# Supplementary material for: Phylogenetic and functional analysis of cyanobacterial Cytochrome c 6-like proteins
Source: Front Plant Sci. 2023 Sep 6;14:1227492. doi: 10.3389/fpls.2023.1227492 (PMC10513939; doi:10.3389/fpls.2023.1227492)
Supplement: Supplementary Table 1 — Sequences used in this study for the analysis and comparison of Cyt c 6-like proteins in cyanobacteria. [file Table_1.xlsx]

## Sheet: Sequences used in the analysis
Cytochrome classification	Species	Accesion link	Nucleotide Sequence	Aminoacid sequence	Aminoacid sequence without transit peptide
Cytochrome c6	Aliterella atlantica CENA595	UH38_21725	ATGAAGAAAATATTATCAGTCCTACTGCTAGTTGCGTTTACTTTTGCCTTCACTTCCCCAGCTACAGCAGCAGACAGCGCCAACGGAGCAAAGATATTTACAGCCAATTGCACTGCTTGTCATTTGGGCGGGCGTAACGTTGTGGCTGCTGCTAAAACTTTAAAGCAAGATGCCTTAGATAAAAATAATATGAATTCTCTTGAGGCAATTATTACGCAGGTGCATAATGGCAAAAATGCCATGCCTGCTTTTAAAAGTCGGTTAAATGACCAACAAATTGAAGATGTAGCTACTTACGTATTAGAGCAAGCAGCAAAAGATTGGAGCTAA	MKKILSVLLLVAFTFAFTSPATAADSANGAKIFTANCTACHLGGRNVVAAAKTLKQDALDKNNMNSLEAIITQVHNGKNAMPAFKSRLNDQQIEDVATYVLEQAAKDWS	ADSANGAKIFTANCTACHLGGRNVVAAAKTLKQDALDKNNMNSLEAIITQVHNGKNAMPAFKSRLNDQQIEDVATYVLEQAAKDWS
Cytochrome c6	Anabaena cylindrica PCC 7122	Anacy_0445	ATGAAAAAGATTATTTCTATATTACTGTTAGGCATCACCATCTTCACCTTTGCCTTCAGTAATCCCGCTTTAGCGGCTGATGCTGCTGCTGGAAAAGTAGTATTTACAGCTAATTGCGCTTCTTGTCACGCGGGTGGTAAGAATCTAGTTCAAGCTGACAAATCCTTGAAAAAGGAAGATTTGGAAAAGTATGGTATTTATTCAGCAGCAGGTATTGTTGCTCAAGTTACCAATGGTAAAAATGCTATGCCTGCCTTCAAAGATCGTTTAAAGGCAGATCAAATTGAAAATGTAGCTGCTTATGTACTTGAACAGGCAGAAGCTGGCTGGTAG	MKKIISILLLGITIFTFAFSNPALAADAAAGKVVFTANCASCHAGGKNLVQADKSLKKEDLEKYGIYSAAGIVAQVTNGKNAMPAFKDRLKADQIENVAAYVLEQAEAGW	ADAAAGKVVFTANCASCHAGGKNLVQADKSLKKEDLEKYGIYSAAGIVAQVTNGKNAMPAFKDRLKADQIENVAAYVLEQAEAGW
Cytochrome c6	Anabaena cylindrica PCC 7122	Anacy_0446	ATGAAAAAGATTATTTCCGTATTACTGTTAGGCATCGCTATATTAACCTTTGCCTTCAGTAGTCCCGCTTTAGCGGCTGATGCTGCTGCTGGAAAAGCAGTGTTTACAGCTAATTGCGCTTCTTGTCATGCGGGTGGTAAAAATTTAGTTAATGCTGCGAAAAGCTTGAAGAAAGCAGATTTGGTAAAGTACGATATGTACTCAGCCGAAGCTATCATTGCTCAAGTTACTAAGGGTAAAGGTGCCATGCCTGCTTTTAAAGGTCGTTTAAAACCAGCCCAGATTGAAAACGTAGCTGCCTATGTACTGGAACAAGCTGATAAAGATTGGAAGTAA	MKKIISVLLLGIAILTFAFSSPALAADAAAGKAVFTANCASCHAGGKNLVNAAKSLKKADLVKYDMYSAEAIIAQVTKGKGAMPAFKGRLKPAQIENVAAYVLEQADKDWK	ADAAAGKAVFTANCASCHAGGKNLVNAAKSLKKADLVKYDMYSAEAIIAQVTKGKGAMPAFKGRLKPAQIENVAAYVLEQADKDWK
Cytochrome c6	Anabaena sp. WA102	AA650_07485	ATGAAAAATATCGTCTCAGTATTATTAATAGGCATAGCCATCTTCACCTTTGCCTTCAGTAGCCCCGCTTTGGCTGCTGACGCTGCTAGTGGCGCTGCATTATTTAAGGCTAATTGCGCTCAGTGTCACGTTGGGGGCGGAAATTTAGTTAATCGAGCTAAAACCTTGAAGAAAGAGGCTTTAGAAAAGTACGGTATGTACTCGGCTGAAAAAATTATTGCTCAAGTTACTAAAGGTCAAGGTGCAATGCCAGCCTTTGGTAATAAATTAAAAGTAGATCAAATAGAAAATGTAGCTGCTTATGTACTAGAACAAGCTGATAATGGCTGGAAAAAGTAA	MKNIVSVLLIGIAIFTFAFSSPALAADAASGAALFKANCAQCHVGGGNLVNRAKTLKKEALEKYGMYSAEKIIAQVTKGQGAMPAFGNKLKVDQIENVAAYVLEQADNGWKK	ADAASGAALFKANCAQCHVGGGNLVNRAKTLKKEALEKYGMYSAEKIIAQVTKGQGAMPAFGNKLKVDQIENVAAYVLEQADNGWKK
Cytochrome c6	Aphanizomenon flos-aquae 2012/KM1/D3	OA07_03535	ATGAAAAAGATCATCTCAGTATTATTAATAGGCATAGCCATCTTCACCTTTGCCTTCAGTAGTCCCGCTTTGGCCGCGGACGCTGCTAGTGGAGCTAAAGTATTTAGTGCTAATTGTGCTTCTTGTCATGCGGGTGGCAGAAATTTAGTTAATGCTGCCAAAACCCTGAAAAAAGCAGATTTGGAAAAGTACGATATGTACTCGGCTGAAGCAATTATTGCTCAAGTTACTAAGGGTAAAGGCGCAATGCCAGCCTTTAAGGGTCGGTTAAAAGCAGAGCAAATAGAAAATGTAGCTGCTTATGTCCTACAACAAGCTGATAACGGCTGGAAGAAGT	MKKIISVLLIGIAIFTFAFSSPALAADAASGAKVFSANCASCHAGGRNLVNAAKTLKKADLEKYDMYSAEAIIAQVTKGKGAMPAFKGRLKAEQIENVAAYVLQQADNGWKK	ADAASGAKVFSANCASCHAGGRNLVNAAKTLKKADLEKYDMYSAEAIIAQVTKGKGAMPAFKGRLKAEQIENVAAYVLQQADNGWKK
Cytochrome c6	Aphanothece hegewaldii CCALA 016	C7H19_16590	TTGAAAAAACTACTATTACTGATCGTTCTATTTTTCTCGGTCACGCTGTTTAGCCTGACTCAGCCTGCCTTTGCGGGTGATGCTGCTAGTGGTGCAAAAGTTTTCACCGCTAACTGTGCCGCTTGCCATCAAGGGGGCAAAAATGTTGTTAACGCAGCTAAAACCCTACAAAAAGCTGATTTAGAAAAAAACAGTATGAACTCTATAGAAGCAATTGTGACTCAAGTTACAAAAGGTAAAAATGCAATGCCCGCTTTTGCTGGACGTATCAGTACAGATGATATCGAAAATGTAGCAGCTTACGTCTTAGCTCAATCTGAAGGCGGCTGGAAATAG	MKKLLLLIVLFFSVTLFSLTQPAFAGDAASGAKVFTANCAACHQGGKNVVNAAKTLQKADLEKNSMNSIEAIVTQVTKGKNAMPAFAGRISTDDIENVAAYVLAQSEGGWK	GDAASGAKVFTANCAACHQGGKNVVNAAKTLQKADLEKNSMNSIEAIVTQVTKGKNAMPAFAGRISTDDIENVAAYVLAQSEGGWK
Cytochrome c6	Aphanothece sacrum FPU1	AsFPU1_1246	ATGAAAAGACTATTATCCGCGATTTTACTCGTTGTTGCTTTCTTTTGTATCAGCTTTACTCCTCCGGCTTTAGCTGATGGAGGAACCATTTTTAGTGCTAAATGCGCCCAATGTCATTTGGGAGGGAAAAATTTAGTTAATCCCGCTAAAACCCTCTCAAAAGCCGATTTAGACAAGTATGGTTATGATCTTAAGGCTATTATCGGTCAAGTAACCAATGGCAAAGGAGCAATGCCAGCTTTTGGCAAACTCTTAAAACCAGAACAAATTGAAGAAGTAGCGGCTTATGTTTTAGCTCAAGCTGATAAAAGCTGGGCTAAATAA	MKRLLSAILLVVAFFCISFTPPALADGGTIFSAKCAQCHLGGKNLVNPAKTLSKADLDKYGYDLKAIIGQVTNGKGAMPAFGKLLKPEQIEEVAAYVLAQADKSWAK	ADGGTIFSAKCAQCHLGGKNLVNPAKTLSKADLDKYGYDLKAIIGQVTNGKGAMPAFGKLLKPEQIEEVAAYVLAQADKSWAK
Cytochrome c6	Brasilonema octagenarum UFV-E1	DP113_17550	ATGAAAAAGATTTTTTCAGTATTGTTGTTGGTGATGGTAATTTTTACCTTTGCCTTCAATTCTCCAGCTCTTGCAGCAGACGCTGCTAAGGGAGCTAAACTCTTCAGTGCCAATTGCGCTCAGTGTCATGCGGGTGGGAAGAACTTAGTTAACGCTGCCAAAACCTTAAAAAAAGAGGCTTTGCAAAAGTTTGATATGTACTCAGAAGAAGCTATTATCACCCAAGTGACAAAAGGTAAAGGTGCCATGCCTGCCTTCAAAGGTCGTTTAAAACCTGAGCAAATTGAAGATGTAGCAGCATATGTGCTCGGACAAGCTGATAATGGTTGGAAGTAA	MKKIFSVLLLVMVIFTFAFNSPALAADAAKGAKLFSANCAQCHAGGKNLVNAAKTLKKEALQKFDMYSEEAIITQVTKGKGAMPAFKGRLKPEQIEDVAAYVLGQADNGWK	ADAAKGAKLFSANCAQCHAGGKNLVNAAKTLKKEALQKFDMYSEEAIITQVTKGKGAMPAFKGRLKPEQIEDVAAYVLGQADNGWK
Cytochrome c6	Brasilonema sennae CENA114	DP114_17615	ATGAAAAAGATTTTTTCAGTATTGTTGTTGGTGATGGTAATTTTTACCTTTGCCTTCAATTCTCCAGCTCTTGCAGCAGACGCTGCTAAGGGAGCTAAACTCTTCAGTGCCAATTGCGCTCAGTGTCATGCGGGTGGGAAGAACTTAGTTAACGCTGCCAAAACCTTAAAAAAAGAGGCTTTGCAAAAGTTTGATATGTACTCAGAAGAAGCTATTATCACCCAAGTGACAAAAGGTAAAGGTGCCATGCCTGCCTTCAAAGGTCGTTTAAAACCTGAGCAAATTGAAGATGTAGCAGCATATGTGCTCGGACAAGCTGATAATGGTTGGAAGTAA	MKKIFSVLLLVMVIFTFAFNSPALAADAAKGAKLFSANCAQCHAGGKNLVNAAKTLKKEALQKFDMYSEEAIITQVTKGKGAMPAFKGRLKPEQIEDVAAYVLGQADNGWK	ADAAKGAKLFSANCAQCHAGGKNLVNAAKTLKKEALQKFDMYSEEAIITQVTKGKGAMPAFKGRLKPEQIEDVAAYVLGQADNGWK
Cytochrome c6	Brasilonema sp. UFV-L1	DP117_17300	ATGAAAAAAATTCTTTCAGTATTGTTGCTGAGCATAGCAATTTTCACGCTCGCCTTCAATTGTCCAGCTCTTGCAGGAGATGCAGCTAAAGGAGCGAAAATCTTCAGTGCCAATTGTGCTCAGTGTCATGCGGGTGGAAAGAACCTAGTTAACGCTGCCAAAACCTTGAAAAAAGAGGCTTTGGAAAAGTATGGCATGTACTCAGAGGAAGCTATTATTGCCCAAGTGACAAAAGGTAAAGGTGCCATGCCCGCTTTCAAAGGTCGTTTGAAACCTGAGCAAATTGAAGATGTCACAGCATACGTGCTGGGAAAAGCTGATAAGGGATGGAAGTAA	MKKILSVLLLSIAIFTLAFNCPALAGDAAKGAKIFSANCAQCHAGGKNLVNAAKTLKKEALEKYGMYSEEAIIAQVTKGKGAMPAFKGRLKPEQIEDVTAYVLGKADKGWK	GDAAKGAKIFSANCAQCHAGGKNLVNAAKTLKKEALEKYGMYSEEAIIAQVTKGKGAMPAFKGRLKPEQIEDVTAYVLGKADKGWK
Cytochrome c6	Brasilonema sp. UFV-L1	DP117_12555	ATGAAAAAAATTCTTTCAGTATTGTTGTTGGGCATAGCAATTTTCACGTTCGCCTTCAATCGTCCAGCGCTTGCAGGAGATGCAGTAAAAGGAGCAAAAATCTTCAGTGCTAATTGCGTTTCTTGTCATGCGGGTGGGAAAAACCTGGTTCAAGCTAACAAAACCTTGAAGAAAGACGCTTTGGAAAAGTATGGCATGTACTCAGAGGAAGCTATTATCACTCAAGTGACAAAAGGTAAAAATGCCATGCCCTCCTTCAAAGGTCGTTTGAAACCTGTACAAATTGAAGATGTCACAGCATACGTACTGGAAAAAGCTGATAAGGGATGGAAATGA	MKKILSVLLLGIAIFTFAFNRPALAGDAVKGAKIFSANCVSCHAGGKNLVQANKTLKKDALEKYGMYSEEAIITQVTKGKNAMPSFKGRLKPVQIEDVTAYVLEKADKGWK	GDAVKGAKIFSANCVSCHAGGKNLVQANKTLKKDALEKYGMYSEEAIITQVTKGKNAMPSFKGRLKPVQIEDVTAYVLEKADKGWK
Cytochrome c6	Brasilonema sp. UFV-L1	DP117_35415	ATGAAAAAAATTTTTTCAGCATTGTTGCTAGTCATGGCAATTTTTACCTTTGCCTTTAATCGTCCAGTTCTAGCCGCAGATGCTGTTAAGGGATCAAAAATCTTCACTGCCAATTGCGTTTCTTGTCACGTCGGTGGAAAGAACCTGGTTCAAGCTAACAAAACCTTGAAAAAAGACGCTTTGGAAAAATATGGGATGTATTCGGCAGATGCTATTATTACTCAAGTGACAAAAGGTAAAAATGCCATGCCTGCTTTCAAAGGTCGTTTGAAACCCGAGCAAATTGAAGATGTCGCAGCATACGTGTTGGAACAAGCTGATAAAGGCTGGAAGTAA	MKKIFSALLLVMAIFTFAFNRPVLAADAVKGSKIFTANCVSCHVGGKNLVQANKTLKKDALEKYGMYSADAIITQVTKGKNAMPAFKGRLKPEQIEDVAAYVLEQADKGWK	ADAVKGSKIFTANCVSCHVGGKNLVQANKTLKKDALEKYGMYSADAIITQVTKGKNAMPAFKGRLKPEQIEDVAAYVLEQADKGWK
Cytochrome c6	Calothrix desertica PCC 7102	CAL7102_03206	ATGAAAAGAATTGTATCAGTATTGCTGTTAGGTGTAGCACTTTTCACCTTTGCTTTCAGTCGTCCTGCATTAGCTGATGGAGATGCTGTGGCTGGAGGAAAAATCTTCAGTGCGAACTGCGCTTCTTGTCACGCAGGTGGTAAAAACTTGGTTAACGCACAAAAAACTCTACAAAAAGATGCTTTAGAAAAGTACAATATGTACTCAGAAGAAGCAATTATTACCCAAGTTACAAAGGGTAAAAATGCTATGCCTGCCTTTGGTGGTCGCTTGAAACCAGAGCAAATTGCTAACGTCGCAAGTTATGTGTTGTCGCAAGCAGATAAAGGCTGGAAGTAG	MKRIVSVLLLGVALFTFAFSRPALADGDAVAGGKIFSANCASCHAGGKNLVNAQKTLQKDALEKYNMYSEEAIITQVTKGKNAMPAFGGRLKPEQIANVASYVLSQADKGWK	GDAVAGGKIFSANCASCHAGGKNLVNAQKTLQKDALEKYNMYSEEAIITQVTKGKNAMPAFGGRLKPEQIANVASYVLSQADKGWK
Cytochrome c6	Calothrix elsteri CCALA 953	CK510_17455	ATGAAGAGAATTGTTTCAGTATTGCTGCTAGGCATGGCAATTTTCACTTTTGCATTTAGCCGTCCTGCTTTTGCTGCTGGTGACGCAGCGAGTGGAGCAAAAATCTTCAGCGCTAATTGTGCTTCATGCCATGCTGGTGGTAAAAACCTAGTTCAAGCCAACAAGACTTTGAAAAAAGACGCTTTAGAAAAGTACGGCATGTACTCAGAAGAAGCGATTATTGCCCAAGTCGCTGGTGGTAAAAATGCAATGCCTGCTTTTACAGGACGTTTGAATGACGCGCAAAAGGCAGATGTAGCAGCTTACGTACTTTCGCAAGCTGATAAAGGCTGGTAA	MKRIVSVLLLGMAIFTFAFSRPAFAAGDAASGAKIFSANCASCHAGGKNLVQANKTLKKDALEKYGMYSEEAIIAQVAGGKNAMPAFTGRLNDAQKADVAAYVLSQADKGW	GDAASGAKIFSANCASCHAGGKNLVQANKTLKKDALEKYGMYSEEAIIAQVAGGKNAMPAFTGRLNDAQKADVAAYVLSQADKGW
Cytochrome c6	Calothrix sp. 336/3	IJ00_04465	ATGAGAAGAATTCTTTCAGTATTAGTTTTAGGTCTAGCTATCTTTACCTTTGCTTTTAGCAGTCCTGCCCTCGCTGGAGACGCTGCAAGCGGAGCCAAAGTTTTCAGTGCCAACTGTGCTGCTTGTCACGCTGGTGGTAAAAACTTAGTGCAAGCTGACAAAAACCTGGGCAAACCTGCTTTAGAAAAATACGGTATGTATTCCGCAGAAGCCATTATTACCCAAGTTACCAAGGGCAAAAATGCTATGCCCGCGTTTGCTGGTCGTTTGACTGCTACACAAATCGAGGATGTTGCAGCATACGTCCTATCTGAAGCAGACAAAGACTGGAAATAG	MRRILSVLVLGLAIFTFAFSSPALAGDAASGAKVFSANCAACHAGGKNLVQADKNLGKPALEKYGMYSAEAIITQVTKGKNAMPAFAGRLTATQIEDVAAYVLSEADKDWK	GDAASGAKVFSANCAACHAGGKNLVQADKNLGKPALEKYGMYSAEAIITQVTKGKNAMPAFAGRLTATQIEDVAAYVLSEADKDWK
Cytochrome c6	Calothrix sp. HK-06	NIES2101_21080	ATGAAAAGAATTGTATCAGTATTGCTGCTAGGAGTAGCAATTTTCACCTTTGCCTTCAGTCGCCCTGCATTGGCTGATGGAGATGCTGTGGCTGGAGGAAAAATCTTCAATGCGAATTGCGCTTCTTGTCACGCAGGTGGTAAAAACTTGGTTAACGCACAAAAAACTCTACAAAAAGATGCTTTAGAAAAGTACAATATGTACTCTGAAGAAGCAATTATTACCCAAGTTACAAAGGGTAAAAATGCTATGCCTGCCTTTGGTGGTCGCTTGAAACCAGAGCAAATTGCTAACGTCGCAAGTTATGTGTTGTCGCAAGCAGATAAAGGCTGGAAATAG	MKRIVSVLLLGVAIFTFAFSRPALADGDAVAGGKIFNANCASCHAGGKNLVNAQKTLQKDALEKYNMYSEEAIITQVTKGKNAMPAFGGRLKPEQIANVASYVLSQADKGWK	GDAVAGGKIFNANCASCHAGGKNLVNAQKTLQKDALEKYNMYSEEAIITQVTKGKNAMPAFGGRLKPEQIANVASYVLSQADKGWK
Cytochrome c6	Calothrix sp. NIES-4071	NIES4071_31500	ATGAAAAAAATTGTATCAGTATTGCTCTTAGGCGTAGCAATTTTTACACTAGCCTTCAGTCGTCCTGCATTAGCTGATGGAGATGCTGTGGCTGGAGGAAAAGTCTTCAGTACGAACTGCGCTTCCTGTCACGCAGGTGGTAAAAACTTGGTTAATGCTCAAAAAACTCTACAGAAAAGTGCTTTAGAAAAGTACAATATGTACTCAGAAGAAGCAATCGTCACCCAAGTTACCAAGGGTAAAAATGCTATGCCCGCTTTTGGTGGTCGCTTAAAACCAGAACAAATTGCTAACGTAGCAAGTTATGTTTTGTCGCAAGCAGATAAAGGTTGGAAATAG	MKKIVSVLLLGVAIFTLAFSRPALADGDAVAGGKVFSTNCASCHAGGKNLVNAQKTLQKSALEKYNMYSEEAIVTQVTKGKNAMPAFGGRLKPEQIANVASYVLSQADKGWK	GDAVAGGKVFSTNCASCHAGGKNLVNAQKTLQKSALEKYNMYSEEAIVTQVTKGKNAMPAFGGRLKPEQIANVASYVLSQADKGWK
Cytochrome c6	Calothrix sp. PCC 6303	Cal6303_1039	ATGAAAAGAATTGTATCTGTATTGCTGTTGGGCATTACCATCTTCACATTTGCCTTTAACCGTCCTGCGTTAGCTGATGCTACCCTTGGCGCAAAGGTTTTCAGCGCCAACTGTGCTCAATGTCATGCAGGTGGTAAGAACTTGGTTAACGCTGCTAAGACTTTGAAGAAAGAAGATTTGGAAAAGTACTCTATGTACTCTGCTGAAGCTATTATCACCCAAGTTACTAAAGGCAAAGGCGCAATGCCTGCTTTTGGCGGACGTTTGAATGCTACTCAAATTGAAGATGTAGCATCTTATGTATTAGAACAGGCTGATAAAGGTTGGAGCTAG	MKRIVSVLLLGITIFTFAFNRPALADATLGAKVFSANCAQCHAGGKNLVNAAKTLKKEDLEKYSMYSAEAIITQVTKGKGAMPAFGGRLNATQIEDVASYVLEQADKGWS	ADATLGAKVFSANCAQCHAGGKNLVNAAKTLKKEDLEKYSMYSAEAIITQVTKGKGAMPAFGGRLNATQIEDVASYVLEQADKGWS
Cytochrome c6	Calothrix sp. PCC 7507	Cal7507_2718	ATGAAAAAAATTATTTCAGTAATACTGTTAGCTGTAGCAGTCTTCACTTTTGCTTTCAGTAGTCCAGCTTTAGCAGCAGATCCGGTCAGTGGAGCCAAAGTATTTAGTGCTAACTGTGCCCAGTGTCATGCAGGTGGTAAAAATTTAGTCAACGCTGCCAAAACCCTGAAAAAGTCAGATTTGGTAAAGTATGGTCTTGATACACCGGAAGCTATTATCGCTCAAGTCACAAAAGGTAAAGGCGCTATGCCTGCCTTCAAGGGTCGTTTAAAGCCAGGACAAATTGAAGATGTAGCTGCCTACGTGCTTGACAAAGCCGATAAAAACTGGAAGTAG	MKKIISVILLAVAVFTFAFSSPALAADPVSGAKVFSANCAQCHAGGKNLVNAAKTLKKSDLVKYGLDTPEAIIAQVTKGKGAMPAFKGRLKPGQIEDVAAYVLDKADKNWK	ADPVSGAKVFSANCAQCHAGGKNLVNAAKTLKKSDLVKYGLDTPEAIIAQVTKGKGAMPAFKGRLKPGQIEDVAAYVLDKADKNWK
Cytochrome c6	Chamaesiphon polymorphus CCALA 037	C7B77_10650	TTGAAAAAGCTGATTTCGATTTTAACCGTAGCGTTCGCGCTGTTTACAATGACATTTAGCAGTCCAGCTTTGGCTGGCGACGCAGCTAGCGGCAGCAAAATCTTTAGTGCTAATTGTGCAGCTTGTCACGCTGGTGGCAACAATGTCATCATGGCCAACAAGAATCTCAAAAAAGAAGCTTTGGCAGAATACGGGATGAATTCGGTTGCAGCAATTACTACCCAAGTCACTAATGGGAAGAATGCTATGCCTGCTTTTGGTGGCAGACTCAGTGCCGCTCAAATCGAAGATGTAGCTACTTATGTTTTGGCTCAATCGGAAAAAGGTTGGTAG	MKKLISILTVAFALFTMTFSSPALAGDAASGSKIFSANCAACHAGGNNVIMANKNLKKEALAEYGMNSVAAITTQVTNGKNAMPAFGGRLSAAQIEDVATYVLAQSEKGW	GDAASGSKIFSANCAACHAGGNNVIMANKNLKKEALAEYGMNSVAAITTQVTNGKNAMPAFGGRLSAAQIEDVATYVLAQSEKGW
Cytochrome c6	Chlorogloeopsis fritschii PCC 6912	PCC6912_04590	ATGAAAAAGTTCTTTACAGTGTTGTTACTTGGGATCGCAATTTTAACTTTTACTTTTAGTCACTCTGCTTTGGCAGCAGATGCCGCTAGCGGTGCTAAAGTTTTTAGTGCTAATTGTGCAGCTTGTCATGCTGGTGGGAAAAATTTGGTTCAAGCAGAAAAAAGCCTGAAAAAAGAAGCATTGGACAAGTATGGTATGTACTCAAAAGATGCAATTATTGCCCAAGTAACGAATGGTAAAAATGCGATGCCTGCCTTTAAGGGGCGTTTGAAAACAGAACAAATTGAAGATGTAGCAACATATGTTTTAGAACAAGCCGAGCAAGGCTGGAAGTAA	MKKFFTVLLLGIAILTFTFSHSALAADAASGAKVFSANCAACHAGGKNLVQAEKSLKKEALDKYGMYSKDAIIAQVTNGKNAMPAFKGRLKTEQIEDVATYVLEQAEQGWK	ADAASGAKVFSANCAACHAGGKNLVQAEKSLKKEALDKYGMYSKDAIIAQVTNGKNAMPAFKGRLKTEQIEDVATYVLEQAEQGWK
Cytochrome c6	Chondrocystis sp. NIES-4102	NIES4102_13800	ATGATTGCCCGCAATGGGGTTTTTGACTGGATTTTAAGAATTCTGAGAGGAGAAACCATGTTATCTAAATTATTATCAACATTTTTGATCTTTATAACTGCTGCGATGTTTGTTTTAGCTACTCCTGCTTTGGCTGGGGATGCTGCTAATGGAGCTAAAATTTTTAGTGCTAACTGTGCTGCTTGTCATGCTGGCGGTAACAATGTAGTTAATGCTGCAAAAACTCTTAAACAAGAAGCTTTGGAAAAATATGAGATGAATTCCATCGAGGCAATTACTACTCAAGTTACTAATGGTAAAAATGCTATGCCAGCTTTTAAAGGTCGTTTAACTGATGCACAGATTGAGGATGTGGCGACTTATGTTTTATCTCAAGCTGAGAAAGGATGGTAA	MIARNGVFDWILRILRGETMLSKLLSTFLIFITAAMFVLATPALAGDAANGAKIFSANCAACHAGGNNVVNAAKTLKQEALEKYEMNSIEAITTQVTNGKNAMPAFKGRLTDAQIEDVATYVLSQAEKGW	GDAANGAKIFSANCAACHAGGNNVVNAAKTLKQEALEKYEMNSIEAITTQVTNGKNAMPAFKGRLTDAQIEDVATYVLSQAEKGW
Cytochrome c6	Chroococcidiopsis cubana CCALA 043	C7B79_28775	ATGCGAACGATCGCGTTAGCTTTGCTATTGGCTGTTGCTATTTGGACTCTAACTTTTCCCAATGCAGCCTTAGCAGCAGACATAGCCAACGGAGCCAAAGTGTTTAATAGCAACTGTGCTGCTTGTCATATGGGAGGAAAAAATGTGGTGATGGCGACAAAAACACTACAGAAAGATGCTTTAGAAAAATATAGTATGAATTCTCTAGAAGCAATTATCAACCAAGTCACAAATGGTAAAAATGCTATGCCTGCCTTCAAAGGAAAATTAAATGTCCAGCAGATTGAGGATGTCGCCTCTTACGTGCTGGACAAATCCGAAAAAGGATGGAGCTGA	MRTIALALLLAVAIWTLTFPNAALAADIANGAKVFNSNCAACHMGGKNVVMATKTLQKDALEKYSMNSLEAIINQVTNGKNAMPAFKGKLNVQQIEDVASYVLDKSEKGWS	ADIANGAKVFNSNCAACHMGGKNVVMATKTLQKDALEKYSMNSLEAIINQVTNGKNAMPAFKGKLNVQQIEDVASYVLDKSEKGWS
Cytochrome c6	Chroococcidiopsis sp. CCALA 051	C7Y66_16635	ATGCGAACGATCGCGTTAGCTTTGCTATTGGCTGTTGCTATTTGGACTCTAACTTTTCCCAATGCAGCCTTAGCAGCAGACATAGCCAACGGAGCCAAAGTGTTTAATAGCAACTGTGCTGCTTGTCATATGGGAGGAAAAAATGTGGTGATGGCGACAAAAACACTACAGAAAGATGCTTTAGAAAAATATAGTATGAATTCTCTAGAAGCAATTATCAACCAAGTCACAAATGGTAAAAATGCTATGCCTGCCTTCAAAGGAAAATTAAATGTCCAGCAGATTGAGGATGTCGCCTCTTACGTACTGGAAAAATCCGAAAAAGGATGGAGCTGA	MRTIALALLLAVAIWTLTFPNAALAADIANGAKVFNSNCAACHMGGKNVVMATKTLQKDALEKYSMNSLEAIINQVTNGKNAMPAFKGKLNVQQIEDVASYVLEKSEKGWS	ADIANGAKVFNSNCAACHMGGKNVVMATKTLQKDALEKYSMNSLEAIINQVTNGKNAMPAFKGKLNVQQIEDVASYVLEKSEKGWS
Cytochrome c6	Chroococcidiopsis sp. PCC 6712	Chr6712_002123	ATGTTAAAAAAATTTTTGGCAGTAGTGTTTGCGATTGTTACTGTCGTTAGCTTAGGCTTTGCTCATCCTGCTTTAGCTGGTGATGCTGCTAATGGTGGTAAAGTTTTTGGTGCTAACTGTGCTGCTTGCCATGCGGGTGGTAATAATGTAGTTAATGGTGCTAAAACTTTAAAACAAGACGCTCTAAAACAATACGATAAATATTCTGTAGAAGCTATTGTGACTCAAGTAACTAAAGGTGCTGGTGCAATGCCTGCTTTTGGAAGTAAGTTATCTGCTGCGGAAATTGAAGATGTAGCTACTTACGTACTTTCTCAAGCTGATGCTGGCTGGTAA	MLKKFLAVVFAIVTVVSLGFAHPALAGDAANGGKVFGANCAACHAGGNNVVNGAKTLKQDALKQYDKYSVEAIVTQVTKGAGAMPAFGSKLSAAEIEDVATYVLSQADAGW	GDAANGGKVFGANCAACHAGGNNVVNGAKTLKQDALKQYDKYSVEAIVTQVTKGAGAMPAFGSKLSAAEIEDVATYVLSQADAGW
Cytochrome c6	Chroococcidiopsis sp. TS-821	B1A85_10710	GTGAAAAAAGTTTTATCAATAATTTTACTCAGTTTAATTCTTGTCACTTTAGCATTTGTCCCTCCAGTATTAGCAGCTGACGCTGCCAGTGGAGCAAAAATCTTTAGTACTAACTGTGCTGCTTGTCACATGGGCGGGAGAAACGTTGTCGCAGCACAAAAAACATTGAAAAAGGAAGATCTAGAAAAGTACAACATGAATTCGCTGGAGGCAATTATCCACCAGGTACAAAATGGTAAAAATGCTATGCCAGCCTTTAAAGGACGTTTAAGCGAGCAGCAAATTGAAGATGTTGCCGCGTATGTGTTAGAACAAGCAGCTAAAGGTTGGACATAA	MKKVLSIILLSLILVTLAFVPPVLAADAASGAKIFSTNCAACHMGGRNVVAAQKTLKKEDLEKYNMNSLEAIIHQVQNGKNAMPAFKGRLSEQQIEDVAAYVLEQAAKGWT	ADAASGAKIFSTNCAACHMGGRNVVAAQKTLKKEDLEKYNMNSLEAIIHQVQNGKNAMPAFKGRLSEQQIEDVAAYVLEQAAKGWT
Cytochrome c6	Chroococcus sp. FPU101	CFPU101_45720	TTGAGAAAACTACTATTACTGATCGTTCTATTTTTCTCGGTCACGCTGTTTAGCTTGACTCAGCCTGCTTTCGCGGGTGATGCTGCTAGTGGTGCTAAAGTTTTTACAGCTAACTGTGCAGCTTGCCATCAAGGTGGCAAAAATGTTGTTAATGCAGCTAAAACTCTACAAAAAGCTGATTTAGAAAAAAACAGCATGAATTCTATTGAGGCAATTGTAACCCAAGTCACCAAGGGTAAAAATGCGATGCCTGCTTTTGCTGGACGTATCAGTACAGATGATATCGAAAATGTAGCAGCCTACGTTTTAGCTCAATCTGAAGGCGGCTGGAAATAG	MRKLLLLIVLFFSVTLFSLTQPAFAGDAASGAKVFTANCAACHQGGKNVVNAAKTLQKADLEKNSMNSIEAIVTQVTKGKNAMPAFAGRISTDDIENVAAYVLAQSEGGWK	GDAASGAKVFTANCAACHQGGKNVVNAAKTLQKADLEKNSMNSIEAIVTQVTKGKNAMPAFAGRISTDDIENVAAYVLAQSEGGWK
Cytochrome c6	Chroogloeocystis siderophila 5.2 s.c.1	NIES1031_02415	ATGAAAAAAACTTTAACAGCAATCTTACTTAGCTTGGCAATCGCCTGTCTAGCTTTTGTCCGTCCAGTGTTAGCCGCTGATGCTGCAAGTGGTGCAAAAATTTTTAGTACGAATTGTGCTGCTTGTCATATGGGTGGGCGTAACGTTGTCGTTGCCCAAAAAACCTTAAAGCAAGATGCCTTAGAAAAGTACAGTATGAACTCGATGGAAGCAATTATTCATCAAGTGCAAAATGGTAAAAATGCCATGCCAGCATTTAAAGGACGTCTTAGTGATCAGCAAATTGAAGATGTGGCAGCATATGTGTTAGAACAGGCAGCTAAAGGTTGGACATAA	MKKTLTAILLSLAIACLAFVRPVLAADAASGAKIFSTNCAACHMGGRNVVVAQKTLKQDALEKYSMNSMEAIIHQVQNGKNAMPAFKGRLSDQQIEDVAAYVLEQAAKGWT	ADAASGAKIFSTNCAACHMGGRNVVVAQKTLKQDALEKYSMNSMEAIIHQVQNGKNAMPAFKGRLSDQQIEDVAAYVLEQAAKGWT
Cytochrome c6	Crinalium epipsammum PCC 9333	Cri9333_4278	TTGAAGAAATTGATATCTATTGCCTTGTTAGCTTTAGCTATTGTGACTGTTGCCTTCACTAATCCCGCTTTTGCTGAGGGTGACGCAGCTAGTGGTGCAAAAATCTTCAGTGCTAACTGTGCTGCTTGCCACGCGGGCGGTAACAACGTGATTATGGCTAACAAAAATTTAAAGAAAGAGACCCTTGAAAAGTACGGCATGAACTCCCTTGAGGCGATCGTCAAACAAGTTACTAAGGGTAAAAATGCTATGCCAGCTTTCGCGGGTCGTCTTAACGATCAACAGATTCAAGACGTAGCTACCTATGTTTTAGGACAATCTGAAAAAGGTTGGTAA	MKKLISIALLALAIVTVAFTNPAFAEGDAASGAKIFSANCAACHAGGNNVIMANKNLKKETLEKYGMNSLEAIVKQVTKGKNAMPAFAGRLNDQQIQDVATYVLGQSEKGW	GDAASGAKIFSANCAACHAGGNNVIMANKNLKKETLEKYGMNSLEAIVKQVTKGKNAMPAFAGRLNDQQIQDVATYVLGQSEKGW
Cytochrome c6	Crocosphaera subtropica ATCC 51142	cce_0589	ATGAAAAGATTATTGTCCCTTATTTTGCTTCTTTTTGCCTTTTTTTGTTTCAGTTTTGTGTCCCCTGCCTTAGCTGGTGATGCTGCTGCAGGTAAAGGCATTTTCACCGCTAACTGCGCCTCTTGTCATATGGGAGGCGGTAATGTGGTAGCTGGAGCGAGTAAAGGCTTAACCAAAGATGCTTTAGAGAACAATAAAATGTTGAGTGAAGAAGCCATCATTGCTCAGGTGACTAAGGGGAAAGCTGCAATGCCGGCTTTTTTGGGACGTTTAACAGACACACAAATTGAAGATGTGGCAGCTTATGTCTTAAGTCAAGCAGAAGCGGGATGGTAA	MKRLLSLILLLFAFFCFSFVSPALAGDAAAGKGIFTANCASCHMGGGNVVAGASKGLTKDALENNKMLSEEAIIAQVTKGKAAMPAFLGRLTDTQIEDVAAYVLSQAEAGW	GDAAAGKGIFTANCASCHMGGGNVVAGASKGLTKDALENNKMLSEEAIIAQVTKGKAAMPAFLGRLTDTQIEDVAAYVLSQAEAGW
Cytochrome c6	Cuspidothrix issatschenkoi CHARLIE-1	CUN59_06860	ATGAAAAAGATTATCTCAGTATTATTGTTAGGCATTGCTATCTTAACCTTTGCCTTCAGTGATATGGCTTTAGCAGTAGATGGAGCAGCATTATTTAGTGCTAATTGCGCTCAATGTCATGCTAGGGGTAAAAATTTAGTCAACCCTTCTAAAAGCTTGAAAAAAACAGATTTGGAAAAGTACGAGATGTACTCATCTGAAGCCATTATTGCTCAAATTACTAAAGGTAAAGGTGCGATGCCGGCTTTTGGTAAGAAGTTGAAGGCAGATGAAATACAAGGTATCGCTGCTTATGTACTAGAACAAGCTGAGAAGGGCTGGAAGAAGTAA	MKKIISVLLLGIAILTFAFSDMALAVDGAALFSANCAQCHARGKNLVNPSKSLKKTDLEKYEMYSSEAIIAQITKGKGAMPAFGKKLKADEIQGIAAYVLEQAEKGWKK	ALAVDGAALFSANCAQCHARGKNLVNPSKSLKKTDLEKYEMYSSEAIIAQITKGKGAMPAFGKKLKADEIQGIAAYVLEQAEKGWKK
Cytochrome c6	Cyanobacterium aponinum IPPAS B-1201	CSQ80_00785	ATGAAAAAACTTTTAGGCTTAATTTTGTTATTAATCACAGCAGTTAACTTTTTCTTTGCAACTCCCGCTTTAGCCGGTGATGTAACTAAGGGGGCGGCTATTTTCAGTGCTAATTGTGCATCCTGTCATATGGGGGGTAAAAACGTAGTTAACCCTGCAAAAACTCTACAAAAAGAGGACTTAGAAAAATACGGAATGTATGATATTGAGCAAATAAAAACTCAAGTCATGAATGGAAAGGCGGCGATGCCTTCCTTTTTAAGTCGTTTAACTGATGAAGACATTGACAATGTGGCTTCTTATGTTTTAGCACAAGCTGATAACGGCTGGAAATAA	MKKLLGLILLLITAVNFFFATPALAGDVTKGAAIFSANCASCHMGGKNVVNPAKTLQKEDLEKYGMYDIEQIKTQVMNGKAAMPSFLSRLTDEDIDNVASYVLAQADNGWK	GDVTKGAAIFSANCASCHMGGKNVVNPAKTLQKEDLEKYGMYDIEQIKTQVMNGKAAMPSFLSRLTDEDIDNVASYVLAQADNGWK
Cytochrome c6	Cyanobacterium sp. IPPAS B-1200	A5482_05835	ATGAAGAAAATTATTAGCCTAATCTTATTATTAACAACCTTCCTTAGCTTTTCCTTCACCAGCCCAGCCCTTGCTGGAGATGTTGGCAACGGTGCTGCCATTTTTAGTGCTAACTGTGCCGCTTGTCACATGGGTGGCAGAAATGTAGTAAATGCAGCCAAAACCTTACAAAAAGAAGACCTAGAAAAATATGATATGTATTCCCTCGAAAAAATTATATATCAAGTAAATAAAGGAAAAGCAGCTATGCCGGCATTCCTAGGACGTTTAGATGAGCAACAAATCGAAGATGTAGCCAGTTACGTTTTAGCCCAAGCCGAAAAAGGCTGGAAATAA	MKKIISLILLLTTFLSFSFTSPALAGDVGNGAAIFSANCAACHMGGRNVVNAAKTLQKEDLEKYDMYSLEKIIYQVNKGKAAMPAFLGRLDEQQIEDVASYVLAQAEKGWK	GDVGNGAAIFSANCAACHMGGRNVVNAAKTLQKEDLEKYDMYSLEKIIYQVNKGKAAMPAFLGRLDEQQIEDVASYVLAQAEKGWK
Cytochrome c6	Cyanosarcina cf. burmensis CCALA 770	C7B80_27685	ATGCGAACGATCGCGTTAGCTTTGCTATTGGCTGTTGCTATTTGGACTCTAACTTTTCCCAATGCAGCCTTAGCAGCAGACATAGCCAACGGAGCCAAAGTGTTTAATAGCAACTGTGCTGCTTGTCATATGGGAGGAAAAAATGTGGTGATGGCGACAAAAACACTACAGAAAGATGCTTTAGAAAAATATAGTATGAATTCTCTAGAAGCAATTATCAACCAAGTCACAAATGGTAAAAATGCTATGCCTGCCTTCAAAGGAAAATTAAATGTCCAGCAGATTGAGGATGTCGCCTCTTACGTGCTGGACAAATCCGAAAAAGGATGGAGCTGA	MRTIALALLLAVAIWTLTFPNAALAADIANGAKVFNSNCAACHMGGKNVVMATKTLQKDALEKYSMNSLEAIINQVTNGKNAMPAFKGKLNVQQIEDVASYVLDKSEKGWS	ADIANGAKVFNSNCAACHMGGKNVVMATKTLQKDALEKYSMNSLEAIINQVTNGKNAMPAFKGKLNVQQIEDVASYVLDKSEKGWS
Cytochrome c6	Cyanothece sp. PCC 7425	CYAN7425_RS17925	TTGAGAAAATTGCTTTCCCTTCTGCTGGTCATGATGACAGCATTTACCCTTTTGTCCGCCCGTCCTGCCCTGGCCGATGCCGCTGCTGGAGCTAAGGTTTTCAGCGCCAACTGTGCTGCCTGCCACATGGGGGGCAATAACGTCATTATGGCTAACAAAACCTTGAAGAAAGAAGCTCTGGAACAGTTTGGCATGAACTCTGCTGATGCGATTATCTACCAGGTGCAGCACGGTAAAAATGCCATGCCTGCTTTTGGTGGTCGTCTTAGCGATGAGCAAATTCAGGATGTTGCCGCCTATGTGCTGGAACAGTCTGAAAAAGGCTGGAAAGGCTAA	MRKLLSLLLVMMTAFTLLSARPALADAAAGAKVFSANCAACHMGGNNVIMANKTLKKEALEQFGMNSADAIIYQVQHGKNAMPAFGGRLSDEQIQDVAAYVLEQSEKGWKG	ADAAAGAKVFSANCAACHMGGNNVIMANKTLKKEALEQFGMNSADAIIYQVQHGKNAMPAFGGRLSDEQIQDVAAYVLEQSEKGWKG
Cytochrome c6	Cylindrospermopsis raciborskii C03	CEP13_05935	ATGAAGAAAATTATTTCCGTATTATTGCTGGGTATTGCAATTTTTACACTTACCTTCAGCAATTCAGCTTTAGCAGCGGATGCAGCAGCTGGAGCAAGTGTATTTAAAGCTAATTGTGCCCAATGTCATCTTGGTGGTAAAAACTTAGTCAATGCGGCTAAGACCCTCAAAAAAGAGGCTTTAGAAGAGTATGATATGTACTCCCAGGAAGCCATTATTACGCAGGTACGGAGGGGCAAAGGTGCTATGCCAGCATTCGGTAAGAGACTAAACCCTGCTCAAATTGAGAATGTGGCAGCCTATGTACTAGAACAAGCGGATGAAGGCTGGAAGAAGTAA	MKKIISVLLLGIAIFTLTFSNSALAADAAAGASVFKANCAQCHLGGKNLVNAAKTLKKEALEEYDMYSQEAIITQVRRGKGAMPAFGKRLNPAQIENVAAYVLEQADEGWKK	ADAAAGASVFKANCAQCHLGGKNLVNAAKTLKKEALEEYDMYSQEAIITQVRRGKGAMPAFGKRLNPAQIENVAAYVLEQADEGWKK
Cytochrome c6	Cylindrospermopsis raciborskii C03	CEP13_16655	ATGAAAAAGATTATTGCCGTATTGATGTTATCCATTGCCATCTTGACCCTTGCTTTCGGTAGTCCTGCTATAGCAGCAGATACAGCAGCTGGAGCAGCGGTATTTCAAGCTAATTGTGCCCAGTGTCATGCTGGTGGTAAAAACCTAGCTAATGCTGCTAAAACCTTGAGCAAAGCAGATCTAGAAGAGTACAATTTGTATTCCCAAGATGCTATTATTGCTCAAGTTACAAACGGTAAAAACAGTATGCCTAAGTTCAAAGGTAAATTAAGCGCTGAACAAATTGCCGATGTAGCAGCTTATGTTATGGAGCAAGCTGAAGCTGGTTGGTAA	MKKIIAVLMLSIAILTLAFGSPAIAADTAAGAAVFQANCAQCHAGGKNLANAAKTLSKADLEEYNLYSQDAIIAQVTNGKNSMPKFKGKLSAEQIADVAAYVMEQAEAGW	ADTAAGAAVFQANCAQCHAGGKNLANAAKTLSKADLEEYNLYSQDAIIAQVTNGKNSMPKFKGKLSAEQIADVAAYVMEQAEAGW
Cytochrome c6	Cylindrospermopsis raciborskii C07	CEP15_02910	ATGAAGAAAATTATTTCCGTATTATTGCTGGGTATTGCAATTTTTACACTTACCTTCAGCAATTCAGCTTTAGCAGCGGATGCAGCAGCTGGAGCAAGTGTATTTAAAGCTAATTGTGCCCAATGTCATCTTGGTGGTAAAAACTTAGTCAATGCGGCTAAGACCCTCAAAAAAGAGGCTTTAGAAGAGTATGATATGTACTCCCAGGAAGCCATTATTACGCAGGTACGGAGGGGCAAAGGTGCTATGCCAGCATTCGGTAAGAGACTAAACCCTGCTCAAATTGAGAATGTGGCAGCCTATGTACTAGAACAAGCGGATGAAGGCTGGAAGAAGTAA	MKKIISVLLLGIAIFTLTFSNSALAADAAAGASVFKANCAQCHLGGKNLVNAAKTLKKEALEEYDMYSQEAIITQVRRGKGAMPAFGKRLNPAQIENVAAYVLEQADEGWKK	ADAAAGASVFKANCAQCHLGGKNLVNAAKTLKKEALEEYDMYSQEAIITQVRRGKGAMPAFGKRLNPAQIENVAAYVLEQADEGWKK
Cytochrome c6	Cylindrospermopsis raciborskii C07	CEP15_18125	ATGAAAAAGATTATTGCCGTATTGATGTTATCCATTGCCATCTTGACCCTTGCTTTCGGTAGTCCTGCTATAGCAGCAGATACAGCAGCTGGAGCAGCGGTATTTCAAGCTAATTGTGCCCAGTGTCATGCTGGTGGTAAAAACCTAGCTAATGCTGCTAAAACCTTGAGCAAAGCAGATCTAGAAGAGTACAATTTGTATTCCCAAGATGCTATTATTGCTCAAGTTACAAACGGTAAAAACAGTATGCCTAAGTTCAAAGGTAAATTAAGCGCTGAACAAATTGCCGATGTAGCAGCTTATGTTATGGAGCAAGCTGAAGCTGGTTGGTAA	MKKIIAVLMLSIAILTLAFGSPAIAADTAAGAAVFQANCAQCHAGGKNLANAAKTLSKADLEEYNLYSQDAIIAQVTNGKNSMPKFKGKLSAEQIADVAAYVMEQAEAGW	ADTAAGAAVFQANCAQCHAGGKNLANAAKTLSKADLEEYNLYSQDAIIAQVTNGKNSMPKFKGKLSAEQIADVAAYVMEQAEAGW
Cytochrome c6	Cylindrospermopsis raciborskii CENA302	CENA302_03100	ATGAAGAGAATTATTTCCGTATTGCTACTGGGTATTGCAATTTTCACACTTACCTTCACCAATTCAGCTTTAGCAGTAGATGCAGCAGCTGGGTCACGTGTATTTAAAGCTAATTGTAACGCATGTCACATTGGTGGTAAGAATTTAGTTAATGCAGCCAAGACCCTCAAAAAAGAGGCTTTAGAAAAGTATGGTATGTACTCCCAAGAAGCCATTGTTACACAAGTTACAAAAGGTAAAGGTGCTATGCCCGCATTTGGTAAGAGACTGAAAGAGGATCAAATTGAAAACGTGGCAGCTTATGTACTAGAACAAGCGGGTAAAGGCTGGAAGAAGTAG	MKRIISVLLLGIAIFTLTFTNSALAVDAAAGSRVFKANCNACHIGGKNLVNAAKTLKKEALEKYGMYSQEAIVTQVTKGKGAMPAFGKRLKEDQIENVAAYVLEQAGKGWKK	VDAAAGSRVFKANCNACHIGGKNLVNAAKTLKKEALEKYGMYSQEAIVTQVTKGKGAMPAFGKRLKEDQIENVAAYVLEQAGKGWKK
Cytochrome c6	Cylindrospermopsis raciborskii CENA302	CENA302_14115	ATGAAAAAGATTATTGCCGTATTGATGTTATCCATTGCCATCTTGACTCTTGCTTTCGGTAGTCCTGCTATAGCAGCAGATACAGCAGCTGGAGCAGAGGTATTTAAAGCTAATTGTGCCCAGTGTCATGCTGGTGGTAAAAACCTAGCTAATGCTGCTAAAACCTTGAGCAAAGCAGATCTAGAAGAGTACAATTTGTATTCACAAGATGCTATTATTGCTCAAGTTACAAACGGTAAAAACAGTATGCCTAAGTTCAAAGGTAAATTAAGTGCTGAACAAATTGCCGATGTAGCAGCTTATGTTATGGAGCAAGCTGAAGCCGGTTGGTAA	MKKIIAVLMLSIAILTLAFGSPAIAADTAAGAEVFKANCAQCHAGGKNLANAAKTLSKADLEEYNLYSQDAIIAQVTNGKNSMPKFKGKLSAEQIADVAAYVMEQAEAGW	ADTAAGAEVFKANCAQCHAGGKNLANAAKTLSKADLEEYNLYSQDAIIAQVTNGKNSMPKFKGKLSAEQIADVAAYVMEQAEAGW
Cytochrome c6	Cylindrospermopsis raciborskii CENA303	B7O87_08715	ATGAAGAGAATTATTTCCGTATTGCTACTGGGTATTGCAATTTTCACACTTACCTTCACCAATTCAGCTTTAGCAGTAGATGCAACAATTGGGGCAAGTGTATTTAAAGCTAATTGTGCCCAATGTCACATTGGTGGTAAGAATTTGGTTAATGCAGCTAAGACTCTCAAGAAAGAGGCTTTAGAAAAGTATGGTATGTACTCCCAAGAAGCCATTGTTACACAAGTTACAAAGGGTAAAGGTGCTATGCCCGCATTCGGTAAGAGACTGAAACAGAATCAAATTGAGAATGTGGCAGCTTATGTACTAGAACAAGCGGGTAAAGGCTGGAAGAATTAG	MKRIISVLLLGIAIFTLTFTNSALAVDATIGASVFKANCAQCHIGGKNLVNAAKTLKKEALEKYGMYSQEAIVTQVTKGKGAMPAFGKRLKQNQIENVAAYVLEQAGKGWKN	VDATIGASVFKANCAQCHIGGKNLVNAAKTLKKEALEKYGMYSQEAIVTQVTKGKGAMPAFGKRLKQNQIENVAAYVLEQAGKGWKN
Cytochrome c6	Cylindrospermopsis raciborskii Cr2010	C6N34_15575	ATGAAGAGAATTATTTCCGTATTACTACTGGGTATTGCAATTTTCACACTTGCCTTCAGCAATTCAGCTTTAGCAGTGGATGCAGCAGCTGGAGCAAGTGTATTTAAAGCTAATTGTGCCCAATGTCATCTTGGTGGTAAAAACTTAGTCAATGCAGCTAAGACACTCAAAAAAGAGGCTTTAGAAAAGTATGGCATGTACTCCCAGGAAGCCATTGTTTCTCAGGTTACAAAGGGTAAAGGTGCTATGCCAGCATTCGGTAAGAGACTAAAATCTGCTCAAATTGAGAATGTGGCAGCCTATGTACTAGAACAAGCGGATAAAGGCTGGAAGAAGTAA	MKRIISVLLLGIAIFTLAFSNSALAVDAAAGASVFKANCAQCHLGGKNLVNAAKTLKKEALEKYGMYSQEAIVSQVTKGKGAMPAFGKRLKSAQIENVAAYVLEQADKGWKK	VDAAAGASVFKANCAQCHLGGKNLVNAAKTLKKEALEKYGMYSQEAIVSQVTKGKGAMPAFGKRLKSAQIENVAAYVLEQADKGWKK
Cytochrome c6	Cylindrospermopsis raciborskii Cr2010	C6N34_13695	ATGAAAAAGATTATTGCCGTATTGATGTTATCCATTGCCATCTTGACCCTTGCTTTCGGTAGTCCTGCTATAGCAGCAGATACAGCAGCTGGAGCAGCGGTATTTCAAGCTAATTGTGCCCAGTGTCATGCTGGTGGTAAAAACCTAGCTAATGCTGCTAAAACCTTGAGCAAAGCAGATCTAGAAGAGTACAATTTGTATTCCCAAGATGCTATTATTGCTCAAGTTACAAACGGTAAAAACAGTATGCCTAAGTTCAAAGGTAAATTAAGCGCTGAACAAATTGCCGATGTAGCAGCTTATGTTATGGAGCAAGCTGAAGCTGGTTGGTAA	MKKIIAVLMLSIAILTLAFGSPAIAADTAAGAAVFQANCAQCHAGGKNLANAAKTLSKADLEEYNLYSQDAIIAQVTNGKNSMPKFKGKLSAEQIADVAAYVMEQAEAGW	ADTAAGAAVFQANCAQCHAGGKNLANAAKTLSKADLEEYNLYSQDAIIAQVTNGKNSMPKFKGKLSAEQIADVAAYVMEQAEAGW
Cytochrome c6	Cylindrospermopsis raciborskii CS-505	A9P98_00875	ATGAAAAAAATTATTTCCGTATTATTGCTGGGTATTGCAATTTTTACACTTACCTTCAGCAATTCAGCTTTAGCAGCGGATGCAGCAGCTGGAGCAAGTGTATTTAAAGCTAATTGTGCCCAATGTCATCTTGGTGGTAAAAACTTAGTCAATGCGGCTAAGACCCTCAAAAAAGAGGCTTTAGAAAAGTATGATATGTACTCCCAGGAAGCCATTATTACGCAGGTTACAAAGGGCAAAGGTGCTATGCCAGCATTCGGTAAGAGACTAAAACCTGCTCAAATTGAGAATGTGGCAGCCTATGTACTAGAACAAGCGGATAAAGGCTGGAAGAAGTAA	MKKIISVLLLGIAIFTLTFSNSALAADAAAGASVFKANCAQCHLGGKNLVNAAKTLKKEALEKYDMYSQEAIITQVTKGKGAMPAFGKRLKPAQIENVAAYVLEQADKGWKK	ADAAAGASVFKANCAQCHLGGKNLVNAAKTLKKEALEKYDMYSQEAIITQVTKGKGAMPAFGKRLKPAQIENVAAYVLEQADKGWKK
Cytochrome c6	Cylindrospermopsis raciborskii CS-505	A9P98_02375	ATGAAAAAGATTATTGCCGTATTGATGTTATCCATTGCCATCTTGACCCTTGCTTTCGGTAGTCCTGCTATAGCAGCAGATACAGCAGCTGGAGCAGCGGTATTTCAAGCTAATTGTGCCCAGTGTCATGCTGGTGGTAAAAACCTAGCTAATGCTGCTAAAACCTTGAGCAAAGCAGATCTAGAAGAGTACAATTTGTATTCCCAAGATGCTATTATTGCTCAAGTTACAAACGGTAAAAACAGTATGCCTAAGTTCAAAGGTAAATTAAGCGCTGAACAAATTGCCGATGTAGCAGCTTATGTTATGGAGCAAGCTGAAGCTGGTTGGTAA	MKKIIAVLMLSIAILTLAFGSPAIAADTAAGAAVFQANCAQCHAGGKNLANAAKTLSKADLEEYNLYSQDAIIAQVTNGKNSMPKFKGKLSAEQIADVAAYVMEQAEAGW	ADTAAGAAVFQANCAQCHAGGKNLANAAKTLSKADLEEYNLYSQDAIIAQVTNGKNSMPKFKGKLSAEQIADVAAYVMEQAEAGW
Cytochrome c6	Cylindrospermopsis raciborskii CS-508	BCV63_07665	ATGAAGAAAATTATTTCCGTATTATTGCTGGGTATTGCAATTTTTACACTTACCTTCAGCAATTCAGCTTTAGCAGCGGATGCAGCAGCTGGAGCAAGTGTATTTAAAGCTAATTGTGCCCAATGTCATCTTGGTGGTAAAAACTTAGTCAATGCGGCTAAGACCCTCAAAAAAGAGGCTTTAGAAAAGTATGATATGTACTCCCAGGAAGCCATTATTACGCAGGTTACAAAGGGCAAAGGTGCTATGCCAGCATTCGGTAAGAGACTAAAACCTGCTCAAATTGAGAATGTGGCAGCCTATGTACTAGAACAAGCGGATAAAGGCTGGAAGAAGTAA	MKKIISVLLLGIAIFTLTFSNSALAADAAAGASVFKANCAQCHLGGKNLVNAAKTLKKEALEKYDMYSQEAIITQVTKGKGAMPAFGKRLKPAQIENVAAYVLEQADKGWKK	ADAAAGASVFKANCAQCHLGGKNLVNAAKTLKKEALEKYDMYSQEAIITQVTKGKGAMPAFGKRLKPAQIENVAAYVLEQADKGWKK
Cytochrome c6	Cylindrospermopsis raciborskii CS-508	BCV63_12445	ATGAAAAAGATTATTGCCGTATTGATGTTATCCATTGCCATCTTGACCCTTGCTTTCGGTAGTCCTGCTATAGCAGCAGATACAGCAGCTGGAGCAGCGGTATTTCAAGCTAATTGTGCCCAGTGTCATGCTGGTGGTAAAAACCTAGCTAATGCTGCTAAAACCTTGAGCAAAGCAGATCTAGAAGAGTACAATTTGTATTCCCAAGATGCTATTATTGCTCAAGTTACAAACGGTAAAAACAGTATGCCTAAGTTTAAAGGTAAATTAAGCGCTGAACAAATTGCCGATGTAGCAGCTTATGTTATGGAGCAAGCTGAAGCTGGTTGGTAA	MKKIIAVLMLSIAILTLAFGSPAIAADTAAGAAVFQANCAQCHAGGKNLANAAKTLSKADLEEYNLYSQDAIIAQVTNGKNSMPKFKGKLSAEQIADVAAYVMEQAEAGW	ADTAAGAAVFQANCAQCHAGGKNLANAAKTLSKADLEEYNLYSQDAIIAQVTNGKNSMPKFKGKLSAEQIADVAAYVMEQAEAGW
Cytochrome c6	Cylindrospermopsis raciborskii MVCC14	BCV64_13820	ATGAAGAGAATTATTTCCGTATTGCTACTGGGTATTGCAATTTTCACACTTACCTTCACCAATTCAGCTTTAGCAGTAGATGCAGCAGCTGGGTCACGTGTATTTAAAGCTAATTGTAACGCATGTCACATTGGTGGTAAGAATTTAGTTAATGCAGCCAAGACCCTCAAAAAAGAGGCTTTAGAAAAGTATGGTATGTACTCCCAAGAAGCCATTGTTACACAAGTTACAAAAGGTAAAGGTGCTATGCCCGCATTTGGTAAGAGACTGAAAGAGGATCAAATTGAAAACGTGGCAGCTTATGTACTAGAACAAGCGGGTAAAGGCTGGAAGAAGTAG	MKRIISVLLLGIAIFTLTFTNSALAVDAAAGSRVFKANCNACHIGGKNLVNAAKTLKKEALEKYGMYSQEAIVTQVTKGKGAMPAFGKRLKEDQIENVAAYVLEQAGKGWKK	VDAAAGSRVFKANCNACHIGGKNLVNAAKTLKKEALEKYGMYSQEAIVTQVTKGKGAMPAFGKRLKEDQIENVAAYVLEQAGKGWKK
Cytochrome c6	Cylindrospermopsis raciborskii MVCC14	BCV64_13220	ATGAAAAAGATTATTGCCGTATTGATGTTATCCATTGCCATCTTGACTCTTGCTTTCGGTAGTCCTGCTATAGCAGCAGATACAGCAGCTGGAGCAGAGGTATTTAAAGCTAATTGTGCCCAGTGTCATGCTGGTGGTAAAAACCTAGCTAATGCTGCTAAAACCTTGAGCAAAGCAGATCTAGAAGAGTACAATTTGTATTCACAAGATGCTATTATTGCTCAAGTTACAAACGGTAAAAACAGTATGCCTAAGTTCAAAGGTAAATTAAGTGCTGAACAAATTGCCGATGTAGCAGCTTATGTTATGGAGCAAGCTGAAGCCGGTTGGTAA	MKKIIAVLMLSIAILTLAFGSPAIAADTAAGAEVFKANCAQCHAGGKNLANAAKTLSKADLEEYNLYSQDAIIAQVTNGKNSMPKFKGKLSAEQIADVAAYVMEQAEAGW	ADTAAGAEVFKANCAQCHAGGKNLANAAKTLSKADLEEYNLYSQDAIIAQVTNGKNSMPKFKGKLSAEQIADVAAYVMEQAEAGW
Cytochrome c6	Cylindrospermopsis raciborskii S01	CEP07_00980	ATGAAGAAAATTATTTCCGTATTATTGCTGGGTATTGCAATTTTTACACTTACCTTCAGCAATTCAGCTTTAGCAGCGGATGCAGCAGCTGGAGCAAGTGTATTTAAAGCTAATTGTGCCCAATGTCATCTTGGTGGTAAAAACTTAGTCAATGCGGCTAAGACCCTCAAAAAAGAGGCTTTAGAAAAGTATGATATGTACTCCCAGGAAGCCATTATTACGCAGGTTACAAAGGGCAAAGGTGCTATGCCAGCATTCGGTAAGAGACTAAAACCTGCTCAAATTGAGAATGTGGCAGCCTATGTACTAGAACAAGCGGATAAAGGCTGGAAGAAGTAA	MKKIISVLLLGIAIFTLTFSNSALAADAAAGASVFKANCAQCHLGGKNLVNAAKTLKKEALEKYDMYSQEAIITQVTKGKGAMPAFGKRLKPAQIENVAAYVLEQADKGWKK	ADAAAGASVFKANCAQCHLGGKNLVNAAKTLKKEALEKYDMYSQEAIITQVTKGKGAMPAFGKRLKPAQIENVAAYVLEQADKGWKK
Cytochrome c6	Cylindrospermopsis raciborskii S05	CEP08_08815	ATGAAGAAAATTATTTCCGTATTATTGCTGGGTATTGCAATTTTTACACTTACCTTCAGCAATTCAGCTTTAGCAGCGGATGCAGCAGCTGGAGCAAGTGTATTTAAAGCTAATTGTGCCCAATGTCATCTTGGTGGTAAAAACTTAGTCAATGCGGCTAAGACCCTCAAAAAAGAGGCTTTAGAAAAGTATGATATGTACTCCCAGGAAGCCATTATTACGCAGGTTACAAAGGGCAAAGGTGCTATGCCAGCATTCGGTAAGAGACTAAAACCTGCTCAAATTGAGAATGTGGCAGCCTATGTACTAGAACAAGCGGATAAAGGCTGGAAGAAGTAA	MKKIISVLLLGIAIFTLTFSNSALAADAAAGASVFKANCAQCHLGGKNLVNAAKTLKKEALEKYDMYSQEAIITQVTKGKGAMPAFGKRLKPAQIENVAAYVLEQADKGWKK	ADAAAGASVFKANCAQCHLGGKNLVNAAKTLKKEALEKYDMYSQEAIITQVTKGKGAMPAFGKRLKPAQIENVAAYVLEQADKGWKK
Cytochrome c6	Cylindrospermopsis raciborskii S05	CEP08_16675	ATGAAAAAGATTATTGCCGTATTGATGTTATCCATTGCCATCTTGACCCTTGCTTTCGGTAGTCCTGCTATAGCAGCAGATACAGCAGCTGGAGCAGCGGTATTTCAAGCTAATTGTGCCCAGTGTCATGCTGGTGGTAAAAACCTAGCTAATGCTGCTAAAACCTTGAGCAAAGCAGATCTAGAAGAGTACAATTTGTATTCCCAAGATGCTATTATTGCTCAAGTTACAAACGGTAAAAACAGTATGCCTAAGTTCAAAGGTAAATTAAGCGCTGAACAAATTGCCGATGTAGCAGCTTATGTTATGGAGCAAGCTGAAGCTGGTTGGTAA	MKKIIAVLMLSIAILTLAFGSPAIAADTAAGAAVFQANCAQCHAGGKNLANAAKTLSKADLEEYNLYSQDAIIAQVTNGKNSMPKFKGKLSAEQIADVAAYVMEQAEAGW	ADTAAGAAVFQANCAQCHAGGKNLANAAKTLSKADLEEYNLYSQDAIIAQVTNGKNSMPKFKGKLSAEQIADVAAYVMEQAEAGW
Cytochrome c6	Cylindrospermopsis raciborskii S06	CEP09_06750	ATGAAGAAAATTATTTCCGTATTATTGCTGGGTATTGCAATTTTTACACTTACCTTCAGCAATTCAGCTTTAGCAGCGGATGCAGCAGCTGGAGCAAGTGTATTTAAAGCTAATTGTGCCCAATGTCATCTTGGTGGTAAAAACTTAGTCAATGCGGCTAAGACCCTCAAAAAAGAGGCTTTAGAAAAGTATGATATGTACTCCCAGGAAGCCATTATTACGCAGGTTACAAAGGGCAAAGGTGCTATGCCAGCATTCGGTAAGAGACTAAAACCTGCTCAAATTGAGAATGTGGCAGCCTATGTACTAGAACAAGCGGATAAAGGCTGGAAGAAGTAA	MKKIISVLLLGIAIFTLTFSNSALAADAAAGASVFKANCAQCHLGGKNLVNAAKTLKKEALEKYDMYSQEAIITQVTKGKGAMPAFGKRLKPAQIENVAAYVLEQADKGWKK	ADAAAGASVFKANCAQCHLGGKNLVNAAKTLKKEALEKYDMYSQEAIITQVTKGKGAMPAFGKRLKPAQIENVAAYVLEQADKGWKK
Cytochrome c6	Cylindrospermopsis raciborskii S06	CEP09_08860	ATGAAAAAGATTATTGCCGTATTGATGTTATCCATTGCCATCTTGACCCTTGCTTTCGGTAGTCCTGCTATAGCAGCAGATACAGCAGCTGGAGCAGCGGTATTTCAAGCTAATTGTGCCCAGTGTCATGCTGGTGGTAAAAACCTAGCTAATGCTGCTAAAACCTTGAGCAAAGCAGATCTAGAAGAGTACAATTTGTATTCCCAAGATGCTATTATTGCTCAAGTTACAAACGGTAAAAACAGTATGCCTAAGTTCAAAGGTAAATTAAGCGCTGAACAAATTGCCGATGTAGCAGCTTATGTTATGGAGCAAGCTGAAGCTGGTTGGTAA	MKKIIAVLMLSIAILTLAFGSPAIAADTAAGAAVFQANCAQCHAGGKNLANAAKTLSKADLEEYNLYSQDAIIAQVTNGKNSMPKFKGKLSAEQIADVAAYVMEQAEAGW	ADTAAGAAVFQANCAQCHAGGKNLANAAKTLSKADLEEYNLYSQDAIIAQVTNGKNSMPKFKGKLSAEQIADVAAYVMEQAEAGW
Cytochrome c6	Cylindrospermopsis raciborskii S07	CEP10_05395	ATGAAGAAAATTATTTCCGTATTATTGCTGGGTATTGCAATTTTTACACTTACCTTCAGCAATTCAGCTTTAGCAGCGGATGCAGCAGCTGGAGCAAGTGTATTTAAAGCTAATTGTGCCCAATGTCATCTTGGTGGTAAAAACTTAGTCAATGCGGCTAAGACCCTCAAAAAAGAGGCTTTAGAAAAGTATGATATGTACTCCCAGGAAGCCATTATTACGCAGGTTACAAAGGGCAAAGGTGCTATGCCAGCATTCGGTAAGAGACTAAAACCTGCTCAAATTGAGAATGTGGCAGCCTATGTACTAGAACAAGCGGATAAAGGCTGGAAGAAGTAA	MKKIISVLLLGIAIFTLTFSNSALAADAAAGASVFKANCAQCHLGGKNLVNAAKTLKKEALEKYDMYSQEAIITQVTKGKGAMPAFGKRLKPAQIENVAAYVLEQADKGWKK	ADAAAGASVFKANCAQCHLGGKNLVNAAKTLKKEALEKYDMYSQEAIITQVTKGKGAMPAFGKRLKPAQIENVAAYVLEQADKGWKK
Cytochrome c6	Cylindrospermopsis raciborskii S07	CEP10_18580	ATGAAAAAGATTATTGCCGTATTGATGTTATCCATTGCCATCTTGACCCTTGCTTTCGGTAGTCCTGCTATAGCAGCAGATACAGCAGCTGGAGCAGCGGTATTTCAAGCTAATTGTGCCCAGTGTCATGCTGGTGGTAAAAACCTAGCTAATGCTGCTAAAACCTTGAGCAAAGCAGATCTAGAAGAGTACAATTTGTATTCCCAAGATGCTATTATTGCTCAAGTTACAAACGGTAAAAACAGTATGCCTAAGTTCAAAGGTAAATTAAGCGCTGAACAAATTGCCGATGTAGCAGCTTATGTTATGGAGCAAGCTGAAGCTGGTTGGTA	MKKIIAVLMLSIAILTLAFGSPAIAADTAAGAAVFQANCAQCHAGGKNLANAAKTLSKADLEEYNLYSQDAIIAQVTNGKNSMPKFKGKLSAEQIADVAAYVMEQAEAGW	ADTAAGAAVFQANCAQCHAGGKNLANAAKTLSKADLEEYNLYSQDAIIAQVTNGKNSMPKFKGKLSAEQIADVAAYVMEQAEAGW
Cytochrome c6	Cylindrospermopsis raciborskii S10	CEP11_02320	ATGAAGAAAATTATTTCCGTATTATTGCTGGGTATTGCAATTTTTACACTTACCTTCAGCAATTCAGCTTTAGCAGCGGATGCAGCAGCTGGAGCAAGTGTATTTAAAGCTAATTGTGCCCAATGTCATCTTGGTGGTAAAAACTTAGTCAATGCGGCTAAGACCCTCAAAAAAGAGGCTTTAGAAAAGTATGATATGTACTCCCAGGAAGCCATTATTACGCAGGTTACAAAGGGCAAAGGTGCTATGCCAGCATTCGGTAAGAGACTAAAACCTGCTCAAATTGAGAATGTGGCAGCCTATGTACTAGAACAAGCGGATAAAGGCTGGAAGAAGTAA	MKKIISVLLLGIAIFTLTFSNSALAADAAAGASVFKANCAQCHLGGKNLVNAAKTLKKEALEKYDMYSQEAIITQVTKGKGAMPAFGKRLKPAQIENVAAYVLEQADKGWKK	ADAAAGASVFKANCAQCHLGGKNLVNAAKTLKKEALEKYDMYSQEAIITQVTKGKGAMPAFGKRLKPAQIENVAAYVLEQADKGWKK
Cytochrome c6	Cylindrospermopsis raciborskii S10	CEP11_07975	ATGAAAAAGATTATTGCCGTATTGATGTTATCCATTGCCATCTTGACCCTTGCTTTCGGTAGTCCTGCTATAGCAGCAGATACAGCAGCTGGAGCAGCGGTATTTCAAGCTAATTGTGCCCAGTGTCATGCTGGTGGTAAAAACCTAGCTAATGCTGCTAAAACCTTGAGCAAAGCAGATCTAGAAGAGTACAATTTGTATTCCCAAGATGCTATTATTGCTCAAGTTACAAACGGTAAAAACAGTATGCCTAAGTTCAAAGGTAAATTAAGCGCTGAACAAATTGCCGATGTAGCAGCTTATGTTATGGAGCAAGCTGAAGCTGGTTGGTAA	MKKIIAVLMLSIAILTLAFGSPAIAADTAAGAAVFQANCAQCHAGGKNLANAAKTLSKADLEEYNLYSQDAIIAQVTNGKNSMPKFKGKLSAEQIADVAAYVMEQAEAGW	ADTAAGAAVFQANCAQCHAGGKNLANAAKTLSKADLEEYNLYSQDAIIAQVTNGKNSMPKFKGKLSAEQIADVAAYVMEQAEAGW
Cytochrome c6	Cylindrospermopsis raciborskii S14	CEP12_01285	ATGAAGAAAATTATTTCCGTATTATTGCTGGGTATTGCAATTTTTACACTTACCTTCAGCAATTCAGCTTTAGCAGCGGATGCAGCAGCTGGAGCAAGTGTATTTAAAGCTAATTGTGCCCAATGTCATCTTGGTGGTAAAAACTTAGTCAATGCGGCTAAGACCCTCAAAAAAGAGGCTTTAGAAAAGTATGATATGTACTCCCAGGAAGCCATTATTACGCAGGTTACAAAGGGCAAAGGTGCTATGCCAGCATTCGGTAAGAGACTAAAACCTGCTCAAATTGAGAATGTGGCAGCCTATGTACTAGAACAAGCGGATAAAGGCTGGAAGAAGTAA	MKKIISVLLLGIAIFTLTFSNSALAADAAAGASVFKANCAQCHLGGKNLVNAAKTLKKEALEKYDMYSQEAIITQVTKGKGAMPAFGKRLKPAQIENVAAYVLEQADKGWKK	ADAAAGASVFKANCAQCHLGGKNLVNAAKTLKKEALEKYDMYSQEAIITQVTKGKGAMPAFGKRLKPAQIENVAAYVLEQADKGWKK
Cytochrome c6	Cylindrospermopsis raciborskii S14	CEP12_06420	ATGAAAAAGATTATTGCCGTATTGATGTTATCCATTGCCATCTTGACCCTTGCTTTCGGTAGTCCTGCTATAGCAGCAGATACAGCAGCTGGAGCAGCGGTATTTCAAGCTAATTGTGCCCAGTGTCATGCTGGTGGTAAAAACCTAGCTAATGCTGCTAAAACCTTGAGCAAAGCAGATCTAGAAGAGTACAATTTGTATTCCCAAGATGCTATTATTGCTCAAGTTACAAACGGTAAAAACAGTATGCCTAAGTTCAAAGGTAAATTAAGCGCTGAACAAATTGCCGATGTAGCAGCTTATGTTATGGAGCAAGCTGAAGCTGGTTGGTAA	MKKIIAVLMLSIAILTLAFGSPAIAADTAAGAAVFQANCAQCHAGGKNLANAAKTLSKADLEEYNLYSQDAIIAQVTNGKNSMPKFKGKLSAEQIADVAAYVMEQAEAGW	ADTAAGAAVFQANCAQCHAGGKNLANAAKTLSKADLEEYNLYSQDAIIAQVTNGKNSMPKFKGKLSAEQIADVAAYVMEQAEAGW
Cytochrome c6	Cylindrospermopsis sp. CR12	ASL19_14610	ATGAAGAGAATTATTTCCGTATTACTACTGGGTATTGCAATTTTCACACTTGCCTTCAGCAATTCAGCTTTAGCAGTGGATGCAGAAGCTGGAGCAAGTGTATTTAAAGCTAATTGTGCCCAATGTCATCTTGGTGGTAAAAACTTAGTCAATGCAGCTAAGACACTCAAAAAAGAGGCTTTAGAAAAGTATGACATGTACTCCCAGGAAGCCATTGTTTCTCAGGTTACAAAGGGTAAAGGTGCTATGCCAGCATTCGGTAAGAGACTAAAATCTGCTCAAATTGAGAATGTGGCAGCCTATGTACTAGAACAAGCGGATGAAGGCTGGAAGAAGTAA	MKRIISVLLLGIAIFTLAFSNSALAVDAEAGASVFKANCAQCHLGGKNLVNAAKTLKKEALEKYDMYSQEAIVSQVTKGKGAMPAFGKRLKSAQIENVAAYVLEQADEGWKK	VDAEAGASVFKANCAQCHLGGKNLVNAAKTLKKEALEKYDMYSQEAIVSQVTKGKGAMPAFGKRLKSAQIENVAAYVLEQADEGWKK
Cytochrome c6	Cylindrospermopsis sp. CR12	ASL19_08895	ATGAAAAAGATTATTGCCGTATTGATGTTATCCATTGCCATCTTGACCCTTGCTTTCGGTAGTCCTGCTATAGCAGCAGATACAGCAGCTGGAGCAGCGGTATTTCAAGCTAATTGTGCCCAGTGTCATGCTGGTGGTAAAAACCTAGCTAATGCTGCTAAAACCTTGAGCAAAGCAGATCTAGAAGAGTACAATTTGTATTCCCAAGATGCTATTATTGCTCAAGTTACAAACGGTAAAAACAGTATGCCTAAGTTCAAAGGTAAATTAAGCGCTGAACAAATTGCCGATGTAGCAGCTTATGTTATGGAGCAAGCTGAAGCTGGTTGGTAA	MKKIIAVLMLSIAILTLAFGSPAIAADTAAGAAVFQANCAQCHAGGKNLANAAKTLSKADLEEYNLYSQDAIIAQVTNGKNSMPKFKGKLSAEQIADVAAYVMEQAEAGW	ADTAAGAAVFQANCAQCHAGGKNLANAAKTLSKADLEEYNLYSQDAIIAQVTNGKNSMPKFKGKLSAEQIADVAAYVMEQAEAGW
Cytochrome c6	Cylindrospermum sp. NIES-4074	NIES4074_52300	ATGAAAAAGATTCTTTCCGTCATACTGTTAGGCATAACAATCTTCACATTTGCCTTCAGCAGTCCAGCTTTGGCAGCAGATACTGCTAGTGGAGCTAAAGTATTTAGTGCTAATTGTGCCCAATGCCATGCAGGTGGTAGAAATTTAGTTAACGCGGCCAAAAGCTTAAAGAAGGACGCTTTGGAAAAGTACGGTTTGTACTCAGCAGAAGCAATTATTGCCCAAGTTACTAAGGGTAAGGGTGCTATGCCTGCCTTTGGCAAGCGTTTAAAAGCGAATCAAATTGAAGATGTAGCTGCCTACGTGTTGGAACAAGCAGATAAAAGCTGGGCGAAGTAA	MKKILSVILLGITIFTFAFSSPALAADTASGAKVFSANCAQCHAGGRNLVNAAKSLKKDALEKYGLYSAEAIIAQVTKGKGAMPAFGKRLKANQIEDVAAYVLEQADKSWAK	ADTASGAKVFSANCAQCHAGGRNLVNAAKSLKKDALEKYGLYSAEAIIAQVTKGKGAMPAFGKRLKANQIEDVAAYVLEQADKSWAK
Cytochrome c6	Desertifilum sp. IPPAS B-1220	BH720_08235	ATGAAAAGGCTCGTTTTACTATTTTGGGCGGGAATAGCCATTTTAGCCCTATGCTTTCCCCAAGCTGCTTTAGCTGCCGATTTAGCCAATGGGACTAAAGTATTTGATGCTAATTGTGCGGCTTGTCATGCAGGCGGTCGCAATGTGATTATGGCAAATAAGAGCTTAAAAGCAGAAGATTTAAGCAAATATGGCATGGATTCCTTAGACGCGATCAAAACCCAAGTGACTAACGGCAAAAATGCAATGCCAGCCTTCAAAGGACGCCTCAGTGCAGAACAAATTGAAGATGTGGCTAGCTATGTGTTAGATAAATCTGAAAAAGGTTGGTAA	MKRLVLLFWAGIAILALCFPQAALAADLANGTKVFDANCAACHAGGRNVIMANKSLKAEDLSKYGMDSLDAIKTQVTNGKNAMPAFKGRLSAEQIEDVASYVLDKSEKGW	ADLANGTKVFDANCAACHAGGRNVIMANKSLKAEDLSKYGMDSLDAIKTQVTNGKNAMPAFKGRLSAEQIEDVASYVLDKSEKGW
Cytochrome c6	Dolichospermum compactum NIES-806	NIES806_18470	ATGAAAAAAATAATCCCAGTATTATTATTAGGCATAGCTATCTTCACCTTTGCCTTCAGTAGTCCCGCTTTAGCCGCTGACGCTGGTAGTGGCGCGGCAATATTTAAGGCTAATTGTGCTTCTTGTCACGCGGGTGGTAAAAATTTAGTTAATGCTGCCAAAACCCTGAAAAAAGCAGATTTGGAAAAGTACGGTATGTATTCAGCAGAAGCCATTATTGCTCAAGTTACTAAGGGTAAAGGCGCAATGCCAGCTTTTAGTAGGAGGTTAAAACCAGCACAAATAGAAGATGTAGCTGCTTATGTCCTACAACAAGCTGATAATGGCTGGGAAAAGTAA	MKKIIPVLLLGIAIFTFAFSSPALAADAGSGAAIFKANCASCHAGGKNLVNAAKTLKKADLEKYGMYSAEAIIAQVTKGKGAMPAFSRRLKPAQIEDVAAYVLQQADNGWEK	ADAGSGAAIFKANCASCHAGGKNLVNAAKTLKKADLEKYGMYSAEAIIAQVTKGKGAMPAFSRRLKPAQIEDVAAYVLQQADNGWEK
Cytochrome c6	Dolichospermum sp. UHCC 0315A	BMF77_03369	ATGAAAAAGATTGTCTCAGTATTATTATTAGGCATAGCTATCTTCAACTTTGCCTTCAGTAGTCCTGCTTTGGCCGCAGACGCAGCCAGTGGAGCTAAAATATTTAGTGCTAATTGTGCTTCTTGTCATGCGGGTGGCAGAAATTTAGTTAATGCTGCCAAAACCCTGAAAAAAGCAGATTTGGAAAAGTACGGTATGTACTCGGCTGAAGCAATTGTTTATCAAGTTACTAATGGTAAAGGTGCTATGCCAGCCTTTAAGGGTCGGTTAAAAGCAGAGCAAATAGAAAATGTAGCTGCTTATGTCCTACAACAAGCTGATAACGGCTGGAAGAAGTAA	MKKIVSVLLLGIAIFNFAFSSPALAADAASGAKIFSANCASCHAGGRNLVNAAKTLKKADLEKYGMYSAEAIVYQVTNGKGAMPAFKGRLKAEQIENVAAYVLQQADNGWKK	ADAASGAKIFSANCASCHAGGRNLVNAAKTLKKADLEKYGMYSAEAIVYQVTNGKGAMPAFKGRLKAEQIENVAAYVLQQADNGWKK
Cytochrome c6	Fischerella major NIES-592	NIES592_23275	ATGAAAAAGATTTTGTTAGTGTTGTTGCTTGGCATCACAATCTTCACCTTCGCTTTTAATCGTCCTGCTTTAGCCGCAGATGCAGCCAACGGCGCTAAAGTCTTTAGTGCTAACTGTGCTGCTTGTCATGCAGGTGGTAAGAACTTGGTGCAAGCAAATAAAAGCTTGAGTAAAAGCGATTTGGAAAAATATGGCATGAACTCAGCAGAAGCAATTATTGCCCAAGTAACAAATGGGAAAAATGCTATGCCGGCTTTCAAAGCGCGTTTAAAACCAGAACAAATTGAAGATGTTGCTGTTTACGTGTTAGGAGAAGCTGAAAAAGGTTGGAAGTAA	MKKILLVLLLGITIFTFAFNRPALAADAANGAKVFSANCAACHAGGKNLVQANKSLSKSDLEKYGMNSAEAIIAQVTNGKNAMPAFKARLKPEQIEDVAVYVLGEAEKGWK	ADAANGAKVFSANCAACHAGGKNLVQANKSLSKSDLEKYGMNSAEAIIAQVTNGKNAMPAFKARLKPEQIEDVAVYVLGEAEKGWK
Cytochrome c6	Fischerella muscicola CCMEE 5323	CEN44_21025	ATGAAAAAGATTATTTCAGTATTGTTGCTGGGTATGGTAATTTTTACTTTTGCTTTCAATAGTCCAGCTTTAGCAGCAGATGCAACCAGTGGAGCCAAAGTCTTTAGTGCCAATTGTGCTTCTTGTCATGCGGGTGGTAAGAACTTGGTTCAAGCCAACAAAACCTTGAAAAAAGATGCCTTAGAAAAGTTTGGGATGTACTCAGCAGAAGCGATTATCGCCCAAGTTACAAATGGCAAAAATGCTATGCCTGCCTTCAAAGGTCGTTTAAAAACAAATCAAATTGAAGATGTAGCAGCATATGTGCTGGGACAAGCAGACAAGGATTGGAAATAA	MKKIISVLLLGMVIFTFAFNSPALAADATSGAKVFSANCASCHAGGKNLVQANKTLKKDALEKFGMYSAEAIIAQVTNGKNAMPAFKGRLKTNQIEDVAAYVLGQADKDWK	ADATSGAKVFSANCASCHAGGKNLVQANKTLKKDALEKFGMYSAEAIIAQVTNGKNAMPAFKGRLKTNQIEDVAAYVLGQADKDWK
Cytochrome c6	Fischerella muscicola CCMEE 5323	CEN44_02350	ATGAAAAAGATTTTGTTAGTGTTGTTGCTTGGCATCACAATCTTCACCTTCGCTTTTAATCGTCCTGCTTTAGCCGCAGATGCAACCAACGGCGCTAAAGTCTTTAGTGCTAACTGTGCTGCTTGTCATGCGGGTGGTAAGAACTTGGTGCAAGCAAATAAAAGCTTGAATAAAAGCGATTTGGAAAAATATGGCATGAACTCAGCAGAAGCAATTATTGCCCAAGTAACAAATGGGAAAAATGCTATGCCAGCTTTCAAAGCGCGTTTAAAACCAGAACAAATTGAAGATGTTGCTGCTTACGTGTTAAGAGAAGCTGAAAAAGGTTGGAAGTAA	MKKILLVLLLGITIFTFAFNRPALAADATNGAKVFSANCAACHAGGKNLVQANKSLNKSDLEKYGMNSAEAIIAQVTNGKNAMPAFKARLKPEQIEDVAAYVLREAEKGWK	ADATNGAKVFSANCAACHAGGKNLVQANKSLNKSDLEKYGMNSAEAIIAQVTNGKNAMPAFKARLKPEQIEDVAAYVLREAEKGWK
Cytochrome c6	Fischerella sp. NIES-3754	FIS3754_19730	ATGAAAAAGATTTTGTTAGTGTTGTTGCTTGGCATCACAATCTTCACCTTCGCTTTTAATCGTCCTGCTTTAGCCGCAGATGCAACCAACGGCGCTAAAGTCTTTAGTGCTAACTGTGCTGCTTGTCATGCAGGTGGTAAGAACTTGGTGCAAGCAAATAAAAGCTTGAGTAAAAGCGATTTGGAAAAATATGGCATGAACTCAGCAGAAGCAATTATTGCCCAAGTAACAAATGGGAAAAATGCTATGCCGGCTTTCAAAGCGCGTTTAAAACCAGAACAAATTGAAGATGTTGCTGTTTACGTGTTAGGAGAAGCTGAAAAAGGTTGGAAGTAA	MKKILLVLLLGITIFTFAFNRPALAADATNGAKVFSANCAACHAGGKNLVQANKSLSKSDLEKYGMNSAEAIIAQVTNGKNAMPAFKARLKPEQIEDVAVYVLGEAEKGWK	ADATNGAKVFSANCAACHAGGKNLVQANKSLSKSDLEKYGMNSAEAIIAQVTNGKNAMPAFKARLKPEQIEDVAVYVLGEAEKGWK
Cytochrome c6	Fischerella sp. NIES-4106	NIES4106_40020	ATGAAAAAGATTTTGTCAGTGTTGCTGCTTGGCATCACAATCTTCACCTTCGCTTTTAATCGCCCTGCTTTAGCCGCAGATGCAGCTAACGGTGCTAAAATCTTTAGTGCTAATTGTGCTTCTTGTCATGCAGGTGGTAAGAACTTAGTGCAAGCAAATAAAAGCTTGAGCAAAAGTGATTTGGAAAAATATGGCATGAACTCACCAGAGGCTATTATTGCCCAAGTAACAAATGGTAAAAATGCTATGCCGGCTTTTAAAGCTCGTTTAAAACCAGAGCAGATTGAAAATGTTGCTGCTTATGTGTTGGAACAAGCTGACAAAGGTTGGAAGTAA	MKKILSVLLLGITIFTFAFNRPALAADAANGAKIFSANCASCHAGGKNLVQANKSLSKSDLEKYGMNSPEAIIAQVTNGKNAMPAFKARLKPEQIENVAAYVLEQADKGWK	ADAANGAKIFSANCASCHAGGKNLVQANKSLSKSDLEKYGMNSPEAIIAQVTNGKNAMPAFKARLKPEQIENVAAYVLEQADKGWK
Cytochrome c6	Fischerella thermalis	FJSC11DRAFT_0441	ATGAAAAAGATTTTGTTAGTGTTGTTGCTTGGCATCACAATCTTCACCTTCGCTTTTAATCGTCCTGCTTTAGCCGCAGATGCAGCCAACGGCGCTAAAGTCTTTAGTGCTAACTGTGCTGCTTGTCATGCAGGTGGTAAGAACTTGGTGCAAGCAAATAAAAGCTTGAGTAAAAGCGATTTGGAAAAATATGGCATGAACTCAGCAGAAGCAATTATTGCCCAAGTAACAAATGGGAAAAATGCTATGCCGGCTTTCAAAGCGCGTTTAAAACCAGAACAAATTGAAGATGTTGCTGTTTACGTGTTAGGAGAAGCTGAAAAAGGTTGGAAGTAA	MKKILLVLLLGITIFTFAFNRPALAADAANGAKVFSANCAACHAGGKNLVQANKSLSKSDLEKYGMNSAEAIIAQVTNGKNAMPAFKARLKPEQIEDVAVYVLGEAEKGWK	ADAANGAKVFSANCAACHAGGKNLVQANKSLSKSDLEKYGMNSAEAIIAQVTNGKNAMPAFKARLKPEQIEDVAVYVLGEAEKGWK
Cytochrome c6	Fischerella thermalis 111/344/542	CA946_07360	ATGAAAAAGATTTTGTTAGTGTTGTTGCTTGGCATCACAATCTTCACCTTCGCTTTTAATCGTCCTGCTTTAGCCGCAGATGCAGCCAACGGCGCTAAAGTCTTTAGTGCTAACTGTGCTGCTTGTCATGCAGGTGGTAAGAACTTGGTGCAAGCAAATAAAAGCTTGAGTAAAAGCGATTTGGAAAAATATGGCATGAACTCAGCAGAAGCAATTATTGCCCAAGTAACAAATGGGAAAAATGCTATGCCGGCTTTCAAAGCGCGTTTAAAACCAGAACAAATTGAAGATGTTGCTGTTTACGTGTTAGGAGAAGCTGAAAAAGGTTGGAAGTAA	MKKILLVLLLGITIFTFAFNRPALAADAANGAKVFSANCAACHAGGKNLVQANKSLSKSDLEKYGMNSAEAIIAQVTNGKNAMPAFKARLKPEQIEDVAVYVLGEAEKGWK	ADAANGAKVFSANCAACHAGGKNLVQANKSLSKSDLEKYGMNSAEAIIAQVTNGKNAMPAFKARLKPEQIEDVAVYVLGEAEKGWK
Cytochrome c6	Geminocystis sp. NIES-3708	GM3708_920	TTGAAAACTATTCAAACCTTAAAAATGAAAAAAATTATTAGTTTAATATTGTTATTAATCACCGTTGCAACTTTCAGTTTTAGTTCACCAGCATTAGCTGATGCGGCTAATGGGGCTGCCATTTTTAGTGCTAATTGTGCTTCTTGTCACATGGGTGGTAAAAATGTCGTTAATGCAGCTAAAACTCTACAAAAAGCTGATTTAGAAAAATACGAAATGTATAGCTTAGAAAGTATTAAAACTCAAGTAACTAAAGGTAAAGGTGCAATGCCTTCTTTTAGTGGACGTTTAACAGCAGAACAAATTGAAGATGTAGCAACTTATGTTCTTTCTCAAGCTGATAATGGTTGGAAATAA	MKTIQTLKMKKIISLILLLITVATFSFSSPALADAANGAAIFSANCASCHMGGKNVVNAAKTLQKADLEKYEMYSLESIKTQVTKGKGAMPSFSGRLTAEQIEDVATYVLSQADNGWK	ADAANGAAIFSANCASCHMGGKNVVNAAKTLQKADLEKYEMYSLESIKTQVTKGKGAMPSFSGRLTAEQIEDVATYVLSQADNGWK
Cytochrome c6	Gloeocapsa sp. PCC 7428	Glo7428_1383	ATGAAAAAAATTTTAACAGCGATCTTACTGAGCTTAGCGATCGCTAGTCTGGCTTTTGTTCGTCCAGTATTAGCTGCTGATACTGCAAGTGGTGCGAAAATTTTTAGTACGAATTGTGCGGCTTGTCACATGGGTGGGCGTAACGTTGTTGTTGCCCAAAAAACCTTGAAGCAAGATGCTTTAGAAAAGTACAGCATGAACTCGATCGAAGCAATTATTCATCAAGTGCAAAATGGTAAAAATGCTATGCCAGCTTTTAAAGGACGTCTCAGCGATCAGCAAATTGAAGATGTGGCAGCATATGTGTTAGAACAGGCAGCTAAAGGCTGGACATAA	MKKILTAILLSLAIASLAFVRPVLAADTASGAKIFSTNCAACHMGGRNVVVAQKTLKQDALEKYSMNSIEAIIHQVQNGKNAMPAFKGRLSDQQIEDVAAYVLEQAAKGWT	ADTASGAKIFSTNCAACHMGGRNVVVAQKTLKQDALEKYSMNSIEAIIHQVQNGKNAMPAFKGRLSDQQIEDVAAYVLEQAAKGWT
Cytochrome c6	Gloeomargarita lithophora Alchichica-D10	GlitD10_2629	ATGGGTGCTCTAATGACCGTACTGCTAACGATGGTGATGGTGGTGGTGGGTTGGATTCAGCCTGCCCAAGCCGCTGATCTGGCTCACGGGGGCAAAGTGTTTGGTGCCAACTGTGCCGCTTGCCATGCCGGGGGACGGAATGTGGTGGTGGCCAGTAAATCCCTGAAAAAAACCGACCTGGAAAAATACGGCATGGACTTGGCTGGGATTGTCTATCAAGTCACCAACGGCAAAAATGCCATGCCCGCCTTCAAAGGCCGTCTGAGTGCCGCTGATATTGAAGATGTGGCCAACTTTGTGGTGGCGCAGGCGGAAAAAGGCTGGTAG	MGALMTVLLTMVMVVVGWIQPAQAADLAHGGKVFGANCAACHAGGRNVVVASKSLKKTDLEKYGMDLAGIVYQVTNGKNAMPAFKGRLSAADIEDVANFVVAQAEKGW	ADLAHGGKVFGANCAACHAGGRNVVVASKSLKKTDLEKYGMDLAGIVYQVTNGKNAMPAFKGRLSAADIEDVANFVVAQAEKGW
Cytochrome c6	Halomicronema excentricum str. Lakshadweep	DYY88_20015	ATGAAAAACTTTGTTTGGAGTCTCTGTCTCATCTGCCTGGCCTGGTTAATGACAATGGCGCCTGCACTCGCCGGAGATAGCGCCCATGGCGGCCAGATATTTGCTAGCAATTGTGCGGCTTGTCATATTGGTGGCGGCAATGTGGTCAATGCCGCCAAAACCCTGAAGTTGGCAGATTTAGAACAATACGGCATGGCTTCTCTAGAGGCCATCAAAACCCAGGTAACCAATGGCAAGAGTGCCATGCCTGCTTTTGCTGGACGTCTCACCGAGGAAGATATTGAAGATGTCGCTACCTACGTTTTGGCGCAAGCGGAAAAAGGTTGGTAA	MKNFVWSLCLICLAWLMTMAPALAGDSAHGGQIFASNCAACHIGGGNVVNAAKTLKLADLEQYGMASLEAIKTQVTNGKSAMPAFAGRLTEEDIEDVATYVLAQAEKGW	GDSAHGGQIFASNCAACHIGGGNVVNAAKTLKLADLEQYGMASLEAIKTQVTNGKSAMPAFAGRLTEEDIEDVATYVLAQAEKGW
Cytochrome c6	Hapalosiphon sp. MRB220	AMR41_09485	ATGAAAAAGATTTTATCAGTGTTGCTGCTTGGCATCACAATCTTCACCTTCGCTTTTAATCGCCCTGCTTTAGCCGCAGATGCAGCTAACGGTGCTAAAGTCTTTAGCGCTAATTGTGCTTCTTGTCATGCAGGTGGTAAAAACTTAGTGCAAGCAAATAAAAGCTTGAACAAAAGTGACTTGGAAAAATATGGCATGTACTCAGCAGAAGCTATTATTGCCCAAGTGACAAATGGTAAAAATGCTATGCCGGCTTTTAAAGCTCGTTTAAAACCAGAGCAGATTGAAAATGTTGCTGCTTATGTTTTAGAACAAGCTGACAAAGGTTGGAAGTAG	MKKILSVLLLGITIFTFAFNRPALAADAANGAKVFSANCASCHAGGKNLVQANKSLNKSDLEKYGMYSAEAIIAQVTNGKNAMPAFKARLKPEQIENVAAYVLEQADKGWK	ADAANGAKVFSANCASCHAGGKNLVQANKSLNKSDLEKYGMYSAEAIIAQVTNGKNAMPAFKARLKPEQIENVAAYVLEQADKGWK
Cytochrome c6	Hydrococcus rivularis NIES-593	NIES593_17075	ATGAAAAGATTTTTGTCTTTAAGCTTGCTAGTTTTGGCATTGTTTACTTTAACCTTTACTCGTCCTGCCTTAGCTGGAGATTTAGCCAAAGGAGCTAAGTTGTTTTCTGCTAATTGCGCTGCTTGCCATGCCGGTGGCAAGAATGTAGTCAATGCAGCGAAAACGCTGCAAAAAGGCGATTTAGAGAAGTACAGCATGAATTCACTAGAAGCAATTAAGACTCAGATTGCCAAAGGAAAAAATGCTATGCCAGCTTTTGCGGGTCGCTTGAGCGAGCAAGAAATCGATGACGTAGCCAATTATGTCTTGTCTCAAGCAGAAAAAGGTTGGTCTTAA	MKRFLSLSLLVLALFTLTFTRPALAGDLAKGAKLFSANCAACHAGGKNVVNAAKTLQKGDLEKYSMNSLEAIKTQIAKGKNAMPAFAGRLSEQEIDDVANYVLSQAEKGWS	GDLAKGAKLFSANCAACHAGGKNVVNAAKTLQKGDLEKYSMNSLEAIKTQIAKGKNAMPAFAGRLSEQEIDDVANYVLSQAEKGWS
Cytochrome c6	Hydrocoleum sp. CS-953	AFK68_11230	ATGAAAAAATTACTATCCATTGTGCTATTAGCCATAGCGTTTGTTGTTGTTGCAGTACAACCTCCAGCTTTAGCTGCTGATATAGCTCATGGAAAGCAGATATTCACAGGTAACTGTGCAGCTTGCCATATCGGAGGTAAGAATAGCATTAACCCAACAAAGACTTTAAGTAAAGCAGATTTAGAAAAATGGGGTATGTTCAGTGAAGAGAAAATTATCTATCAGGTAACAAATGGTAAAGCTGCTATGCCAGCTTTCAAAAGGCTTGGAGCAACTTCCATTGAAGATGTTACAGCTTATGTTCTAGATCAAGCTGAAAAAGGTTGGTAA	MKKLLSIVLLAIAFVVVAVQPPALAADIAHGKQIFTGNCAACHIGGKNSINPTKTLSKADLEKWGMFSEEKIIYQVTNGKAAMPAFKRLGATSIEDVTAYVLDQAEKGW	ADIAHGKQIFTGNCAACHIGGKNSINPTKTLSKADLEKWGMFSEEKIIYQVTNGKAAMPAFKRLGATSIEDVTAYVLDQAEKGW
Cytochrome c6	Hyella patelloides LEGE 07179	H1P_460005	ATGTTTAAAAGATTATTGGCACTAGCATTTGCCATCGTCACTGTAGTCAGCTTCAGTTTTGCTAGCCCTGCTTTTGCTGGTGATGCTGCTAATGGCGGTAAGATATTTGGTGCTAACTGTGCTGCTTGCCACATGGGAGGAAATAATGTAGTTAACGCTGTTAAAACTTTGAAACAGGATGCTTTAAAGCAGTACGATATGTATTCTTTAGATGCGATTAAGTATCAAGTTACCAACGGAAAGAATGCCATGCCCGCTTTTGGTAGTAAATTAAGTGAGGCACAAATTGAAGACGTGGCTACCTATGTACTTTCCCAGGCTGATAGTGGCTGGTAG	MFKRLLALAFAIVTVVSFSFASPAFAGDAANGGKIFGANCAACHMGGNNVVNAVKTLKQDALKQYDMYSLDAIKYQVTNGKNAMPAFGSKLSEAQIEDVATYVLSQADSGW	GDAANGGKIFGANCAACHMGGNNVVNAVKTLKQDALKQYDMYSLDAIKYQVTNGKNAMPAFGSKLSEAQIEDVATYVLSQADSGW
Cytochrome c6	Kamptonema sp. PCC 6506	OSCI_250010	TTGAAAAGAATCTTATCGATTGTCCTGTTCGCGATCGCAATATTTACCCTCGGTTTTGGTCGCCCTGCATTGGCAGAGGGAAATATCGCTAATGGAGCGAAAGTTTTTGCCGCTAACTGTGCTGCTTGCCATATCGGTGGCGGTAATGTTGTGATGGCTCAAAGAACCTTGAAAAAAGAAGCTTTGGAGAAGTTTGCGATGAACTCTCTAGAAGCCATCACCGCCCAGGTGACAAATGGCAAAAATGCGATGCCAAAATTCAAGGGTCGTTTAAGCGACCAACAAATTGAGGATGTGGCTACCTACGTGCTTTCTCAAGCTGAAAAAGGCTGGAAAGGCTAA	MKRILSIVLFAIAIFTLGFGRPALAEGNIANGAKVFAANCAACHIGGGNVVMAQRTLKKEALEKFAMNSLEAITAQVTNGKNAMPKFKGRLSDQQIEDVATYVLSQAEKGWKG	GNIANGAKVFAANCAACHIGGGNVVMAQRTLKKEALEKFAMNSLEAITAQVTNGKNAMPKFKGRLSDQQIEDVATYVLSQAEKGWKG
Cytochrome c6	Leptolyngbya boryana IAM M-101	LBWT_16630	ATGATTCGCAGAATGAGAACACTGTTGGCTACAATCGTCCTGTCTGTGGTGTTTCTAACCACATTGATCAGCCAACCTGCATTTGCGGCCGACGCAGCAGCAGGCGGAAAAGTCTTTAATGCAAACTGTGCAGCTTGTCATGCAGGCGGCGGTAACGCAATTAACGGCGCAAAAACTTTAAAGAAAGATGCGCTGACCGCAAATGGCAAAGATACAGTTGAAGCGATCGTTGCTCAAGTGACGAATGGCAAAGGTGCAATGCCCGCATTCAAAGGTCGTCTCAGCGATGACCAAATCCAATCCGTTGCACTCTACGTCTTAGATAAAGCAGAGAAAGGTTGGTAA	MIRRMRTLLATIVLSVVFLTTLISQPAFAADAAAGGKVFNANCAACHAGGGNAINGAKTLKKDALTANGKDTVEAIVAQVTNGKGAMPAFKGRLSDDQIQSVALYVLDKAEKGW	ADAAAGGKVFNANCAACHAGGGNAINGAKTLKKDALTANGKDTVEAIVAQVTNGKGAMPAFKGRLSDDQIQSVALYVLDKAEKGW
Cytochrome c6	Leptolyngbya sp. 'hensonii'	BST81_02715	ATGAGAACACGATTGGCTGCAGCCTTTTCCCTGGTCCTGGCCCTGGTAATGTTCATGGTTGCTCGTCCGGCACTGGCAGGTGATGCCGCATCCGGTGCGAAAGTCTTTAGTGCAAATTGTGCCAGCTGCCATGCAGGGGGCAAAAATATTGTAAATCCAGCAAAAACTTTAAAGAAGGCAGATCTGGATCAGTATGGGATGAACACAGCCGCTGCCATTGTGACTCAGGTTACCAATGGTAAAGGGGCGATGCCTTCCTTCAAGGGACGGCTGACGCCAGAACAGATGGAAGATGTAGCTGCTTATGTTTTAGAGCAGTCTAGCCAAGGCTGGTAA	MRTRLAAAFSLVLALVMFMVARPALAGDAASGAKVFSANCASCHAGGKNIVNPAKTLKKADLDQYGMNTAAAIVTQVTNGKGAMPSFKGRLTPEQMEDVAAYVLEQSSQGW	GDAASGAKVFSANCASCHAGGKNIVNPAKTLKKADLDQYGMNTAAAIVTQVTNGKGAMPSFKGRLTPEQMEDVAAYVLEQSSQGW
Cytochrome c6	Leptolyngbya sp. BL0902	GFS31_38610	ATGCGACGGACGGTTTTAACCTTAGCTTTTGCCCTATTGGCTCTAGTAGTGTGGGTGGCCCCCGCCCTAGCGGCAGATTTGGGCCATGGCCAGCAGGTGTTTTCAGCCAACTGCGTGGCCTGTCACATTGGGGGTGGCAATGTGGTGAACGGGGCCAAAACCCTGAAGCAGGCCGACTTGGATCAGTACGACATGGCCTCGGTGGAAGCCATTACGCGCCAAGTCACCAACGGCAAAGCGGCGATGCCCGCCTTCAAGGGTCGCCTCACCGATGAGGATATTGCCGATGTTGCGGCCTATGTGCTGAGCCAAGCCGAGCAGGGCTGGTAG	MRRTVLTLAFALLALVVWVAPALAADLGHGQQVFSANCVACHIGGGNVVNGAKTLKQADLDQYDMASVEAITRQVTNGKAAMPAFKGRLTDEDIADVAAYVLSQAEQGW	ADLGHGQQVFSANCVACHIGGGNVVNGAKTLKQADLDQYDMASVEAITRQVTNGKAAMPAFKGRLTDEDIADVAAYVLSQAEQGW
Cytochrome c6	Leptolyngbya sp. O-77	O77CONTIG1_03654	ATGAAACGGATTTTGCAGGCGCTTTCGATTGTGCTGTCGCTGGTAATTGGGCTAGGGGCGATCGCCCTGCCTGCTCATGCCGATGCTGACCTGGCAACGGGCGCAAAGGTGTTTGGTGCCAACTGTGCCGCCTGCCACGCGGGGGGCATCAATTTGGTCAATGCTGAGAAAACGCTGAAAAAGGAAGCGCTGGAAAAGTTTGGCATGAATTCTATCGCTGCCATTACGACCCAAGTGACCAACGGCAAAGCGGGGATGCCAGCCTTTAAGGGACGGCTGACCGATGACCAGATCGCTGCTGTAGCCGCTTACGTGCTCGATCAAGCTGAAAAGGGCTGGTAG	MKRILQALSIVLSLVIGLGAIALPAHADADLATGAKVFGANCAACHAGGINLVNAEKTLKKEALEKFGMNSIAAITTQVTNGKAGMPAFKGRLTDDQIAAVAAYVLDQAEKGW	ADLATGAKVFGANCAACHAGGINLVNAEKTLKKEALEKFGMNSIAAITTQVTNGKAGMPAFKGRLTDDQIAAVAAYVLDQAEKGW
Cytochrome c6	Leptolyngbya valderiana BDU 20041	AY599_09465	TTGAAAAAGCTCGTTTCGTTTGTCCTGCTCGCCCTGGCAGTGACAGTTTTTGCCTTCGGTCGTCCCGCCTGGGCTGCCGATATCGAACATGGTTCTCAGGTTTTTAGCGCCAACTGCACGGCGTGTCACATGGGAGGAGGCAACGTCGTAAACGCGGCCAAAACCCTCAAAAAAGACGCGCTGGAAAAATACGGAATGGATTCTCTCGAAGCCATTAAAACTCAGGTAACGAACGGGAAAAACGCGATGCCGTCTTTCCTGGGTCGTCTGTCCCCTGACGATATCGAAGACGTAGCCGCCTACGTGCTTTCCCAAGCTGAAAAAGGTTGGTAA	MKKLVSFVLLALAVTVFAFGRPAWAADIEHGSQVFSANCTACHMGGGNVVNAAKTLKKDALEKYGMDSLEAIKTQVTNGKNAMPSFLGRLSPDDIEDVAAYVLSQAEKGW	ADIEHGSQVFSANCTACHMGGGNVVNAAKTLKKDALEKYGMDSLEAIKTQVTNGKNAMPSFLGRLSPDDIEDVAAYVLSQAEKGW
Cytochrome c6	Mastigocoleus testarum BC008	BC008_27810	ATGAAAAAAGTTCTTTCTATTTTGATCGCGGGTATAGCGATTTTAAGTTTTGCATTTTGTCCTCCAGCTTTGGCGGGTGATGCTGCAAGTGGAGCAAAAATTTTCGCAGCTAACTGCAACGCTTGTCATATGGGCGGTAATAATGTAGTTAACGGTGCTAAAACATTAAAATCGGATGCCTTGGAGAAATATGGTATGAACTCTATTGAAAAAATCACATACCAAGTAAACAACGGTAAAAATGCAATGCCAGCATTTAAAGGTCGCTTGACCCCTCAACAAATCGAAGATGTAGCGACCTACGTCTTGGATAAATCAGCTAAAGGCTGGAGCTAA	MKKVLSILIAGIAILSFAFCPPALAGDAASGAKIFAANCNACHMGGNNVVNGAKTLKSDALEKYGMNSIEKITYQVNNGKNAMPAFKGRLTPQQIEDVATYVLDKSAKGWS	GDAASGAKIFAANCNACHMGGNNVVNGAKTLKSDALEKYGMNSIEKITYQVNNGKNAMPAFKGRLTPQQIEDVATYVLDKSAKGWS
Cytochrome c6	Merismopedia glauca CCAP 1448/3	C7B64_08820	GTGAAAAAGTTACTATGGACAGCAGTCATCCTGATGACTACAATGATATTTGGCTTGGCTCAACCAGTGTTAGCCGCAGATTTAGATAATGGTGGTAAATTATTCGCTAATAACTGCGCTGCCTGTCATGCTGGTGGTAAAAATGTAGTTAACCCTCAAAAAACTCTCCAAAAAGCAGATTTAGAGAAGTGGGAAATGTACGATGCTGGTAAAATTACTACCCAAGTAACCAATGGAAAAGGCGCAATGCCCAGCTTCAAAGGACGTTTATCAGATGCAGATATTGCTGATGTAGCTGCTTACGTTTTAGCCCAAGCAGACAAAGGTTGGTAA	MKKLLWTAVILMTTMIFGLAQPVLAADLDNGGKLFANNCAACHAGGKNVVNPQKTLQKADLEKWEMYDAGKITTQVTNGKGAMPSFKGRLSDADIADVAAYVLAQADKGW	ADLDNGGKLFANNCAACHAGGKNVVNPQKTLQKADLEKWEMYDAGKITTQVTNGKGAMPSFKGRLSDADIADVAAYVLAQADKGW
Cytochrome c6	Microcoleus asticus IPMA8	E5S67_00469	TTGAAAAGACTCTTATCGATCGCCCTGTTAGCGTTCGCAATTTTTACCGTCGGCTTTGGCCGCCCTGCTTTGGCAGGAGATGCTGCTAAAGGAGCTAAAATCTTTAGCTCAAACTGTTCTGCTTGTCACATCGGTGGCGGCAACGTGGTTATGGCCATGAAAACCTTGAAATCGGCTGCTCTTGAGAAGTACGGCATGAATTCTATCGAGGCTATTACCACTCAGGTAACTAAGGGCAAAAATGCTATGCCTGCTTTCGGTGCCAAGTTGAAGCCCGAACAAATCGAGGATGTAGCAACCTATGTGCTCGAACAATCTCAGAAAGACTGGAAAGGCTAA	MKRLLSIALLAFAIFTVGFGRPALAGDAAKGAKIFSSNCSACHIGGGNVVMAMKTLKSAALEKYGMNSIEAITTQVTKGKNAMPAFGAKLKPEQIEDVATYVLEQSQKDWKG	GDAAKGAKIFSSNCSACHIGGGNVVMAMKTLKSAALEKYGMNSIEAITTQVTKGKNAMPAFGAKLKPEQIEDVATYVLEQSQKDWKG
Cytochrome c6	Microcoleus vaginatus FGP-2	MicvaDRAFT_2712	TTGAAAAGACTCTTATCGATCGCCCTATTAGCGTTCGCAATTTTTACCGTCGGCTTTGGCCGCCCTGCTTTGGCAGGAGATGCCGCTAACGGAGCTAAAATCTTTAGCTCGAACTGTGCTGCTTGTCACATCGGTGGCGGCAACGTGGTTATGGCCATGAAAACCTTGAAAAAGGAAGCTCTTGAGAAGTACGGTATGAATTCTCTCGAAGCTATTACCACTCAGGTAGCTAAGGGCAAAAATGCTATGCCTGCTTTCGGCGCCAAGTTGAAGCCCCAACAAATTGAGGATGTAGCAACCTACGTGCTCTCGCAATCTGAGAAAGACTGGAAAGGCTAA	MKRLLSIALLAFAIFTVGFGRPALAGDAANGAKIFSSNCAACHIGGGNVVMAMKTLKKEALEKYGMNSLEAITTQVAKGKNAMPAFGAKLKPQQIEDVATYVLSQSEKDWKG	GDAANGAKIFSSNCAACHIGGGNVVMAMKTLKKEALEKYGMNSLEAITTQVAKGKNAMPAFGAKLKPQQIEDVATYVLSQSEKDWKG
Cytochrome c6	Microcystis aeruginosa 11-30S32	MAE30S32_07120	GTGAAAAGATTATTAATTTCCCTGTGCTTGCTCTTGGCTGTGGTTACTTTCGGTATGGCTCGTCCCGCTTTAGCTGATGGGGCTTCGATTTTCAGTGCTAACTGCGCTTCCTGCCACATGGGCGGTAAAAACGTGGTTAATGCCGCTAAAACCCTGAAAAAAGAAGATTTAGTTAAATACGGCAAAGATTCCGTTGAAGCTATCGTTACCCAAGTTACCAAAGGTATGGGTGCGATGCCCGCTTTCGGTGGTCGTCTCAGCGCCGAAGATATCGAAGCTGTAGCTAATTATGTCCTCGCTCAAGCGGAAAAAGGCTGGTAA	MKRLLISLCLLLAVVTFGMARPALADGASIFSANCASCHMGGKNVVNAAKTLKKEDLVKYGKDSVEAIVTQVTKGMGAMPAFGGRLSAEDIEAVANYVLAQAEKGW	PALADGASIFSANCASCHMGGKNVVNAAKTLKKEDLVKYGKDSVEAIVTQVTKGMGAMPAFGGRLSAEDIEAVANYVLAQAEKGW
Cytochrome c6	Microcystis aeruginosa DIANCHI905	C789_4026	GTGAAAAGATTATTAATTTCCCTGTGCTTGCTCTTGGCTGTGGTTACTTTCGGTATGGCTCGTCCCGCTTTAGCTGATGGGGCTTCGATTTTCAGTGCTAACTGCGCTTCCTGCCACATGGGCGGTAAAAACGTGGTTAATGCCGCTAAAACCCTGAAAAAAGAAGATTTAGCTAAATACGGCAAAGATTCCGTTGAAGCTATCGTTGCCCAAGTTACCAAAGGTAACGGTGCGATGCCCGCTTTCGGTGGTCGTCTTAGCGCTGAAGATATCGAAGCTGTAGCTAACTATGTCCTCGCTCAAGCGGAAAAAGGCTGGTAA	MKRLLISLCLLLAVVTFGMARPALADGASIFSANCASCHMGGKNVVNAAKTLKKEDLAKYGKDSVEAIVAQVTKGNGAMPAFGGRLSAEDIEAVANYVLAQAEKGW	PALADGASIFSANCASCHMGGKNVVNAAKTLKKEDLAKYGKDSVEAIVAQVTKGNGAMPAFGGRLSAEDIEAVANYVLAQAEKGW
Cytochrome c6	Microcystis aeruginosa KW	B1L04_02460	GTGAAAAGACTATTAATTTCCCTGTGCTTGCTCTTGGCTGTGGTTACTTTCGGTATGGCTCGTCCCGCTTTAGCTGATGGGGCTTCGATTTTCAGTGCTAACTGTGCTTCCTGCCACATGGGCGGTAAAAACGTGGTTAATGCCGCTAAAACCCTGAAAAAAGAAGATTTAGTTAAATACGGCAAAGATTCCGTTGAAGCTATCGTTACCCAAGTTACCAAAGGTATGGGGGCGATGCCCGCTTTCGGTGGTCGTCTCAGCGCCGAAGATATCGAAGCTGTAGCTAACTATGTCCTCGCTCAAGCGGAAAAAGGCTGGTAA	MKRLLISLCLLLAVVTFGMARPALADGASIFSANCASCHMGGKNVVNAAKTLKKEDLVKYGKDSVEAIVTQVTKGMGAMPAFGGRLSAEDIEAVANYVLAQAEKGW	PALADGASIFSANCASCHMGGKNVVNAAKTLKKEDLVKYGKDSVEAIVTQVTKGMGAMPAFGGRLSAEDIEAVANYVLAQAEKGW
Cytochrome c6	Moorea bouillonii PNG	BJP37_19405	TTGAAAAAAATACTAATTGCGATTCTGCTAGTTTTCGCGTTAATAACCTTCAGCTTCCCTGATTCCGCTTTAGCTGCTGGTGATGCGGCTAAAGGAGAAGCGGTATTTAACGCTAACTGCAATGCTTGTCATCAGGGCGGTGTAAACAGAGTCATACCCATGAAAAATCTGAAGAAGGAGGCCCTGGAGAAATTTGGGATGTATTCTGCTGCAGCTATCATCAAACAAGTCACAAACGGCAAAGGAGCTATGCCTCGCTTTGGTGGTCGTTTAAAACCCGACCAAATTGAAAATGTAGCTGCTTATGTTTTAGACCAGGCTGATAAGTGGTAG	MKKILIAILLVFALITFSFPDSALAAGDAAKGEAVFNANCNACHQGGVNRVIPMKNLKKEALEKFGMYSAAAIIKQVTNGKGAMPRFGGRLKPDQIENVAAYVLDQADKW	GDAAKGEAVFNANCNACHQGGVNRVIPMKNLKKEALEKFGMYSAAAIIKQVTNGKGAMPRFGGRLKPDQIENVAAYVLDQADKW
Cytochrome c6	Moorea producens 3L	BI334_18455	TTGAAAAAAATACTAATTGCGATTCTGCTAGTTTTCGCTTTAATAACCTTGAGCTTCCCTGATTCCGCTTTAGCTGCTGGTGATGCGGCTAAAGGGAAAATGGTATTTAACGCTAACTGCAATGCTTGTCATCAGGGCGGTGTAAACAGAGTCATACCCATGAAAAATCTGAAGAAGGAGGCCCTGGAGAAATTTGGGATGTATTCTGCTGCAGCTATCATCAAACAAGTCACAAACGGCAAAGGAGCTATGCCTCGCTTTGGTGGTCGTTTAAAACCCGACCAAATTGAAGATGTAGCTGCTTATGTTTTACAACAGGCTGATAAAGGCTGGTAG	MKKILIAILLVFALITLSFPDSALAAGDAAKGKMVFNANCNACHQGGVNRVIPMKNLKKEALEKFGMYSAAAIIKQVTNGKGAMPRFGGRLKPDQIEDVAAYVLQQADKGW	GDAAKGKMVFNANCNACHQGGVNRVIPMKNLKKEALEKFGMYSAAAIIKQVTNGKGAMPRFGGRLKPDQIEDVAAYVLQQADKGW
Cytochrome c6	Moorea producens JHB	BJP36_20740	TTGAAAAAAATACTAATTGCGATTCTGCTAGTTTTCGCTTTAATAACCTTCAGCTTCCCTGGTTCCGCTTTAGCTGCTGGTAATCCGGCTAAAGGGAAAATCGTATTTAACGCTAAGTGCAATGTTTGTCATCAGGGCGGTAAAAACAGAGTCATTCCCGTGAAAAATCTGAGCAAGAGCGCCCTGGAGAAATTTGGCATGTATTCTGCTGCAGCTATCATCAAACAAGTAACATACGGCAAAGGAGCTATGCCTCGCTTTGGTAGTAGTTTAAAAACCGCCCAAATTGAAGATGTAGCTGCTTATGTTTTAGAGCAGGCTGATCAAGGCTGGTAG	MKKILIAILLVFALITFSFPGSALAAGNPAKGKIVFNAKCNVCHQGGKNRVIPVKNLSKSALEKFGMYSAAAIIKQVTYGKGAMPRFGSSLKTAQIEDVAAYVLEQADQGW	GNPAKGKIVFNAKCNVCHQGGKNRVIPVKNLSKSALEKFGMYSAAAIIKQVTYGKGAMPRFGSSLKTAQIEDVAAYVLEQADQGW
Cytochrome c6	Moorea producens PAL-8-15-08-1	BJP34_20845	TTGAAAAAAATACTAATTGCGATTCTGCTAGTTTTCGCTTTAATAACTTTCAGCTTCCCTGATTCCGCTTTAGCTGCTGGTGATGCGACTAACGGGGGAAAGTTATTTGCAGCTAACTGCAATGCTTGTCATTGGGGTGGCAACAATGCACTCAATGCCGAGAAGACTCTGGAGAAGGAGGTTCTCGAGAAATATGGGAAGTATTCTGCTGAAGCTATCATCGAACAAGTAACAAACGGCAAACCACCTATGCCTGCCTTTCGTGGTCGTTTAAACACCCAGCAAATTGAAGATGTAGCTGCTTATGTTTTACAACAGGCTGATCAAGGCTGGATTCAGTGA	MKKILIAILLVFALITFSFPDSALAAGDATNGGKLFAANCNACHWGGNNALNAEKTLEKEVLEKYGKYSAEAIIEQVTNGKPPMPAFRGRLNTQQIEDVAAYVLQQADQGWIQ	GDATNGGKLFAANCNACHWGGNNALNAEKTLEKEVLEKYGKYSAEAIIEQVTNGKPPMPAFRGRLNTQQIEDVAAYVLQQADQGWIQ
Cytochrome c6	Nodularia spumigena CENA596	A2T98_00500	ATGAAAAGAATTATTTCCTTGCTACTTTTAGGCATCACTATCTTCACTTTTGCCTTTAGTAGTCCAGCTTTGGCAGCAGATACTGTCAGTGGAGCTAAAATATTTAGTGGTAATTGTGCTTCTTGTCATGCGGGGGGGAAAAATCTGGTTCAAGCTAATAAAAGTTTGAAAAAGGGTGATTTAGAAAAGTACGGTATGTACTCAGCAGAAGCAATTATTAGTCAGGTGACAAATGGTAAAAATGCTATGCCTGCTTTTAAAGGTCGTTTAAAATCAGAGCAGATTGAAAATGTGGCTGCTTACGTACTGGAACAAGCTGATAAAGGTTGGTAG	MKRIISLLLLGITIFTFAFSSPALAADTVSGAKIFSGNCASCHAGGKNLVQANKSLKKGDLEKYGMYSAEAIISQVTNGKNAMPAFKGRLKSEQIENVAAYVLEQADKGW	ADTVSGAKIFSGNCASCHAGGKNLVQANKSLKKGDLEKYGMYSAEAIISQVTNGKNAMPAFKGRLKSEQIENVAAYVLEQADKGW
Cytochrome c6	Nodularia spumigena UHCC 0039	BMF81_00670	ATGAAAAGAATAATTTCCTTGCTACTTTTAGGCATCACTATCTTCACCTTTGCCTTTAGTAGTCCAGCTTTAGCAGCAGATACAGTCAATGGAGCTAAAATATTTGGTGCTAATTGTGCTGCTTGTCATGCTGGTGGTAGAAACCTAGTTCAAGCTCAAAAAACTTTGAAAAAGGACGCTTTAGAAAAGTATGGTTTGTACTCAGCAGAGGCAATTATTAGTCAGGTGACAAAGGGTAAAAATGCTATGCCTGCTTTTAAAGGTCGTTTAAAATCAGAGCAGATTGAAAATGTGGCTGCTTACGTACTCGAACAAGCAGATAAAGGTTGGTAG	MKRIISLLLLGITIFTFAFSSPALAADTVNGAKIFGANCAACHAGGRNLVQAQKTLKKDALEKYGLYSAEAIISQVTKGKNAMPAFKGRLKSEQIENVAAYVLEQADKGW	ADTVNGAKIFGANCAACHAGGRNLVQAQKTLKKDALEKYGLYSAEAIISQVTKGKNAMPAFKGRLKSEQIENVAAYVLEQADKGW
Cytochrome c6	Nostoc calcicola FACHB-389	FACHB389_27075	ATGAAAAAAATTATTACAGTCATGCTGTTAGGCATAGCAATCTTCACCTTTGCCTTCAGTAGTCCAGCTTTAGCCGCAGATACTGCTAGTGGAGCTAAATTATTTAGTGGTAATTGTGCTTCTTGTCATGCGGGTGGCAAGAATTTAGTGAAAGCAGAAAAAAGCCTGAAGAAGGACGCTTTGGAAAAGTATGACATGTACTCAGCAGAGGCGATTATTGCTCAAGTTACAAACGGTAAAGCTGCCATGCCTGCTTTTGGCAAACGTTTAAAGCCTGAGCAGATTGAAAATGTTGCTGCTTATGTACTTGAGCAAGCAGATAAAGGTTGGAAGTAA	MKKIITVMLLGIAIFTFAFSSPALAADTASGAKLFSGNCASCHAGGKNLVKAEKSLKKDALEKYDMYSAEAIIAQVTNGKAAMPAFGKRLKPEQIENVAAYVLEQADKGWK	ADTASGAKLFSGNCASCHAGGKNLVKAEKSLKKDALEKYDMYSAEAIIAQVTNGKAAMPAFGKRLKPEQIENVAAYVLEQADKGWK
Cytochrome c6	Nostoc cycadae WK-1	NCWK1_4028	ATGAAAAAAATCATTTCAGTTATGCTGTTAGGCATTGCTATTTTCACATTTGCCTTCAGCAGCCCAGCATTAGCAGCAGATACCGCCAATGGAGCTAAAGTATTTAGTGCTAATTGTGCTTCTTGTCACGCAGGTGGTAAAAATTTAGTTAATGCTCAAAAGACCTTGAAAAAAGAAGATTTAGAAAAGTATGGCATGAACTCAGCAGAGGCCATTATTGCTCAAGTAACAAATGGTAAAAATGCTATGCCTGCTTTTAAAGGCCGTCTAAAACCTGACCAAATTGAAGATGTAGCTGCTTACGTACTAGAACAAGCAGACAAATCTTGGAAGTAG	MKKIISVMLLGIAIFTFAFSSPALAADTANGAKVFSANCASCHAGGKNLVNAQKTLKKEDLEKYGMNSAEAIIAQVTNGKNAMPAFKGRLKPDQIEDVAAYVLEQADKSWK	ADTANGAKVFSANCASCHAGGKNLVNAQKTLKKEDLEKYGMNSAEAIIAQVTNGKNAMPAFKGRLKPDQIEDVAAYVLEQADKSWK
Cytochrome c6	Nostoc flagelliforme CCNUN1	COO91_07105	ATGAAAAAAATTATTACAGTGATGCTGTTAGGCATAGCAATCTTCATCTTTGCCTTCAGTAGTCCAGCTTTGGCAGCAGATGCTGTTAGTGGAGCTAAAGTATTTAGTGCTAATTGTGCCTCTTGTCATGCGGGAGGTAAAAATCTGGTTCAAGCTCCCAAGAACCTAAAGAAAGAAGCTTTAGAAAAGTATGGTATGTACTCAGCAGAGGCGATTATCGCCCAAGTTACAAAAGGTAAAAATGCCATGCCTGCTTTCGGTAGCCGTTTAAAAGCTAACCAAATTGAAGATGTAACTGCTTATGTGCTTTCACAAGCAGATAAGGACTGGAAGTAG	MKKIITVMLLGIAIFIFAFSSPALAADAVSGAKVFSANCASCHAGGKNLVQAPKNLKKEALEKYGMYSAEAIIAQVTKGKNAMPAFGSRLKANQIEDVTAYVLSQADKDWK	ADAVSGAKVFSANCASCHAGGKNLVQAPKNLKKEALEKYGMYSAEAIIAQVTKGKNAMPAFGSRLKANQIEDVTAYVLSQADKDWK
Cytochrome c6	Nostoc linckia NIES-25	NIES25_58930	ATGAAAAAAATTATTAAAGTCATGCTGCTAGGCATAGCAATCTTCACCTTTGCCTTCAGTAGTCCAGCTTTTGCCGCAGATACTGTTAGTGGAGCTAAAGTATTTAGTGCTAATTGTGCTTCTTGTCATGCAGGCGGCAAGAATTTAGTTAAAGCTGAAAAGAGCTTGAAGAAAGACGCTTTGGAAAAGTATGGTTTGTACTCACAAGAAGCGATTATTGCTCAAGTTACAAACGGTAAAAATGCTATGCCTGCTTTTGGCGGACGTTTAAAAGCTGAGAAAATTGAAGATGTTGCTGCTTATGTGCTTTCACAAGCAGATAAAGACTGGAAGTAG	MKKIIKVMLLGIAIFTFAFSSPAFAADTVSGAKVFSANCASCHAGGKNLVKAEKSLKKDALEKYGLYSQEAIIAQVTNGKNAMPAFGGRLKAEKIEDVAAYVLSQADKDWK	ADTVSGAKVFSANCASCHAGGKNLVKAEKSLKKDALEKYGLYSQEAIIAQVTNGKNAMPAFGGRLKAEKIEDVAAYVLSQADKDWK
Cytochrome c6	Nostoc linckia z1	VF02_34620	ATGAAAAGAATTATTAAAATTATGCTGTTAGGCATAGCAATCTTCACCTTTGCCTTCAGTAGTCCAGCTTTAGCCGGAGATGCTGCTAGCGGAGCTAAAGTATTTAGTGGTAATTGTGCTTCTTGTCATGCAGGCGGTAAAAATTTAGTTAAAGCTGAAAAAAGCTTGAAGAAAGCCGATTTGGAAAAGTATGGTTTGTACTCAGCAGAGGCGATTATTTCTCAAGTTACAAATGGTAAAGGTGCCATGCCTGCTTTTGGCAAACGTTTAAAACCTGAGCAGATTGAAAATGTTGCTGCTTATGTACTTTCACAAGCAGATAAAAGCTGGAAATAG	MKRIIKIMLLGIAIFTFAFSSPALAGDAASGAKVFSGNCASCHAGGKNLVKAEKSLKKADLEKYGLYSAEAIISQVTNGKGAMPAFGKRLKPEQIENVAAYVLSQADKSWK	GDAASGAKVFSGNCASCHAGGKNLVKAEKSLKKADLEKYGLYSAEAIISQVTNGKGAMPAFGKRLKPEQIENVAAYVLSQADKSWK
Cytochrome c6	Nostoc piscinale CENA21	ACX27_09590	ATGAAAAAAGTTATTTCCGTTTTGCTGTTAGGCATTGCCATCTTCACTTTTGCCTTCAGCACCCCAGCTTTAGCAGCTGACACCGACAACGGAGCTAAAGTATTTAGTGCTAATTGTGCTTCTTGTCATGCAGGCGGTAAAAATTTAGTTAACGCTGCCAAGACCTTGAAAAAAGACGATTTAGAAAAGTATGGTATGTACTCAGCAGAAGCCATTATCACTCAAGTCACCAAGGGTAAAAATGCCATGCCTGCTTTTCAAGGTCGTCTAAAACCTAATCAAATTGAAGATGTTGCTGCTTACGTATTAGCACAAGCAGACAAAAGCTGGAAGTAG	MKKVISVLLLGIAIFTFAFSTPALAADTDNGAKVFSANCASCHAGGKNLVNAAKTLKKDDLEKYGMYSAEAIITQVTKGKNAMPAFQGRLKPNQIEDVAAYVLAQADKSWK	ADTDNGAKVFSANCASCHAGGKNLVNAAKTLKKDDLEKYGMYSAEAIITQVTKGKNAMPAFQGRLKPNQIEDVAAYVLAQADKSWK
Cytochrome c6	Nostoc punctiforme PCC 73102	Npun_F1169	ATGAAAAAAATGATTAAAGTCATATTGTTAGGCATAGCAATCTTCACCTTTGCCTTCAGTAGCCCAGCTTTTGCAGGAGATGCCGTTAGTGGAGCTAAAGTATTTAGTGCTAATTGTGCTTCTTGTCATGCGGGAGGTAAGAATCTGGTTCAAGCAGCAAAAAACCTGAAGAAGGAAGCTTTGGAAAAGTATGGTTTGTACTCAGCAGAGGCAATTATTGCCCAAGTTACAAATGGTAAAAATGCTATGCCTGCCTTCGGCAAACGTTTGAAAGCTGACCAAATTGAAAATGTAGCTGCTTACGTGCTTTCACAAGCAGACAAGGGCTGGAAGTAG	MKKMIKVILLGIAIFTFAFSSPAFAGDAVSGAKVFSANCASCHAGGKNLVQAAKNLKKEALEKYGLYSAEAIIAQVTNGKNAMPAFGKRLKADQIENVAAYVLSQADKGWK	GDAVSGAKVFSANCASCHAGGKNLVQAAKNLKKEALEKYGLYSAEAIIAQVTNGKNAMPAFGKRLKADQIENVAAYVLSQADKGWK
Cytochrome c6	Nostoc sp. 'Lobaria pulmonaria (5183) cyanobiont'	NLP_1162	ATGAAAAAAATGATTACAGTCATACTGTTAGGCATAGCAATCTTCACTTTTGCCTTCAGTCGTCCAGCTTTGGCAGTAGATGCTGCTAGTGGAGCTAAAGTATTTAGTGCCAATTGTGCCTCTTGTCACGCGGGAGGAAAGAATCTGGTTCAAGCTGACAAAAACCTGAAGAAAGACGCTTTAGAAAAGTATGGTTTGTACTCAGCAGAGGCGATTATTTCCCAGGTTATAAAAGGTAAAAATGCTATGCCCGCTTTCGGCAAACGTTTGAAGCCTGAACAAATTGAAGATGTAGCGGCTTATGTGCTTTCACAAGCAGATAAAGACTGGAAATAG	MKKMITVILLGIAIFTFAFSRPALAVDAASGAKVFSANCASCHAGGKNLVQADKNLKKDALEKYGLYSAEAIISQVIKGKNAMPAFGKRLKPEQIEDVAAYVLSQADKDWK	VDAASGAKVFSANCASCHAGGKNLVQADKNLKKDALEKYGLYSAEAIISQVIKGKNAMPAFGKRLKPEQIEDVAAYVLSQADKDWK
Cytochrome c6	Nostoc sp. 'Peltigera membranacea cyanobiont' 210A	CDG76_32960	ATGAAAAAAATGATTACAGTCATGCTGTTAGGCATAGCAATCTTCACCTTTGCCTTCAGTCGTCCAGCTTTGGCAGCAGATGCTGCTAGTGGAGCTAAAGTGTTTAGTGCCAATTGTGCCTCTTGTCACGCAGGAGGAAAGAATCTGGTTAAAGCTGAAAAAAGCCTGAAGAAGGAAGCTTTAGAAAAGTATGATTTGTACTCAGCAGAGGCTATTGTTGCCCAGGTTACAAAAGGTAAAGGTGCTATGCCTGCCTTCGGCGCTCGTTTAAAAGCTGACCAAATTGAAAATGTAGCTGCTTATGTTCTTTCACAAGCAGATAAGGCGTGGAAGTAG	MKKMITVMLLGIAIFTFAFSRPALAADAASGAKVFSANCASCHAGGKNLVKAEKSLKKEALEKYDLYSAEAIVAQVTKGKGAMPAFGARLKADQIENVAAYVLSQADKAWK	ADAASGAKVFSANCASCHAGGKNLVKAEKSLKKEALEKYDLYSAEAIVAQVTKGKGAMPAFGARLKADQIENVAAYVLSQADKAWK
Cytochrome c6	Nostoc sp. 'Peltigera membranacea cyanobiont' 213	CDG77_33275	ATGAAAAAGATTATTTCAGTGCTGTTGCTGGGTGTAGCGATTTTCACTTTTGCCTTCAATAATCCAGCTTTCGCAGCAGACGCAGCCAGTGGAGCCAAAGTCTTTAGTGCCAATTGTGCTTCTTGTCATGCAGGTGGTAAAAACTTGGTTCAAGCCAACAAAACTTTGAAAAAGGATGCTTTAGAAAAGTTTGGGATGTACTCAGCAGAAGCGATTATCACTCAAGTTACAAATGGTAAAAACGCTATGCCTGCTTTCAAAAGTCGTTTAAAACCAAATCAAATTGAGGATGTTGCAGCATATGTGCTGGGACAAGCAGACAAGGATTGGAAATAA	MKKIISVLLLGVAIFTFAFNNPAFAADAASGAKVFSANCASCHAGGKNLVQANKTLKKDALEKFGMYSAEAIITQVTNGKNAMPAFKSRLKPNQIEDVAAYVLGQADKDWK	ADAASGAKVFSANCASCHAGGKNLVQANKTLKKDALEKFGMYSAEAIITQVTNGKNAMPAFKSRLKPNQIEDVAAYVLGQADKDWK
Cytochrome c6	Nostoc sp. 'Peltigera membranacea cyanobiont' 213	CDG77_09430	ATGAAAAAATTGATTACAGTCATGCTGTTAGGCATAGCAATCTTCACCTTTGCCTTCAGCAGTCCAGCTTTGGCAGGGGATGCTGTTGGTGGAGCTAAAGTATTTAGTGCTAATTGTGCTTCTTGTCACGCTGGAGGTAAGAATCTGGTTCAAGCTGCCAAAAGTCTGAAGAAAGACGCTTTGGAAAAGTATGATATGTACTCAGCAGAGGCGATTATTGCCCAGGTTACAAAAGGTAAAAATGCCATGCCTGCTTTCGGCAAACGTTTGAAAGATAGCCAGATTGAAGATGTAGCGGCTTATGTGCTTTCACAAGCAGATAAGGACTGGAAGTAG	MKKLITVMLLGIAIFTFAFSSPALAGDAVGGAKVFSANCASCHAGGKNLVQAAKSLKKDALEKYDMYSAEAIIAQVTKGKNAMPAFGKRLKDSQIEDVAAYVLSQADKDWK	GDAVGGAKVFSANCASCHAGGKNLVQAAKSLKKDALEKYDMYSAEAIIAQVTKGKNAMPAFGKRLKDSQIEDVAAYVLSQADKDWK
Cytochrome c6	Nostoc sp. 106C	BV375_31040	ATGAAAAAGTTTTTTTCAATAATACTGTTGGGCATAGCAATCTTCACCTTTGCCTTCAGTAATTCAGCTTTAGCAGCAGACACTGTAAGTGGAGCCAAAGTATTTAGTGCTAATTGTGCTTCTTGTCATGCAGGAGGAAAAAATTTGGTTCAAGCCGACAAGAATCTGAAAAAAGATGCTTTGGAAAAATACAATATGTACTCAGCAGAGGCGATTATCAGCCAAGTAACCAAAGGTAAAAATGCTATGCCTGCTTTTAAAGGACGTTTAAATAGCAGCCAAATTGAAGATGTAGCTGCTTACGTACTTGAACAAGCAGATAAAGGTTGGTAA	MKKFFSIILLGIAIFTFAFSNSALAADTVSGAKVFSANCASCHAGGKNLVQADKNLKKDALEKYNMYSAEAIISQVTKGKNAMPAFKGRLNSSQIEDVAAYVLEQADKGW	ADTVSGAKVFSANCASCHAGGKNLVQADKNLKKDALEKYNMYSAEAIISQVTKGKNAMPAFKGRLNSSQIEDVAAYVLEQADKGW
Cytochrome c6	Nostoc sp. ATCC 53789	A6V25_10930	ATGAAAAAAATGATTACAGTCATACTGTTAGGCATAGCAATCTTCACCTTTGCCTTCAGTAGCCCAGCTTTGGCAGGAGATGCCGTTAGTGGAGCTAAAGTATTTAGTGCTAATTGTGCCTCTTGTCATGCTGGAGGTAAGAATCTGGTTCAAGCAGCAAAAAACCTGAAGAAGGAAGCTTTGGAAAAGTATGGTTTGTACTCAGCAGAGGCAATTATTGCCCAAGTTACAAATGGTAAAAATGCTATGCCTGCCTTCGGCAAACGTTTAAAAGCTGACCAAATTGAAAATGTAGCTGCTTACGTGCTTTCACAAGCAGATAAGGACTGGAAGTAG	MKKMITVILLGIAIFTFAFSSPALAGDAVSGAKVFSANCASCHAGGKNLVQAAKNLKKEALEKYGLYSAEAIIAQVTNGKNAMPAFGKRLKADQIENVAAYVLSQADKDWK	GDAVSGAKVFSANCASCHAGGKNLVQAAKNLKKEALEKYGLYSAEAIIAQVTNGKNAMPAFGKRLKADQIENVAAYVLSQADKDWK
Cytochrome c6	Nostoc sp. CENA543	CLI64_08405	ATGAAGAAAATCTTTTCAATTCTACTGGTAGGCATTGCCATCTTCACTTTTGCCTTCAGTAATTCCGCCTTGGCTGCTGACAGCGCAAATGGAGCAACAATCTTTAATGCTAACTGTGCGGCTTGTCATACAGGTGGTAAAAATTTAGTGCAAGCTAACAAAACCCTGAAGAAAGATGCCTTGGAAGAGTACGGTATGTACTCAGCAGAGGCTATTATCACTCAAGTTACAAATGGTAAAAATGCTATGCCTGCTTTTAAAGGTCGTTTAAACGATTCTCAAATTGAAGATGTAGCAGCTTACGTCCTCGACCAAGCAGATAAATGGTAA	MKKIFSILLVGIAIFTFAFSNSALAADSANGATIFNANCAACHTGGKNLVQANKTLKKDALEEYGMYSAEAIITQVTNGKNAMPAFKGRLNDSQIEDVAAYVLDQADKW	ADSANGATIFNANCAACHTGGKNLVQANKTLKKDALEEYGMYSAEAIITQVTNGKNAMPAFKGRLNDSQIEDVAAYVLDQADKW
Cytochrome c6	Nostoc sp. NIES-3756	NOS3756_05040	ATGAAAAAGATTTTTTCCTTAGTGCTGTTAGGCATAGCACTCTTCACTTTTGCCTTCAGCAGCCCAGCATTGGCGGCAGATAGTGTCAATGGAGCGAAAATATTTAGTGCTAATTGTGCTTCTTGCCATGCCGGCGGCAAGAACTTAGTTCAAGCCAACAAAAATCTCAAGAAAGATGCTTTGGAACAGTTTGGTATGTACTCAGCCCAAGCCATTATTACTCAAGTCACCAATGGTAAAAACGCCATGCCTGCTTTCAAGGGTCGTTTAAAATCTGAACAAATTGAAGATGTAGCTGCTTATGTTCTAGAACAAGCAGACAAGGATTGGAAATAG	MKKIFSLVLLGIALFTFAFSSPALAADSVNGAKIFSANCASCHAGGKNLVQANKNLKKDALEQFGMYSAQAIITQVTNGKNAMPAFKGRLKSEQIEDVAAYVLEQADKDWK	ADSVNGAKIFSANCASCHAGGKNLVQANKNLKKDALEQFGMYSAQAIITQVTNGKNAMPAFKGRLKSEQIEDVAAYVLEQADKDWK
Cytochrome c6	Nostoc sp. NIES-2111	NIES2111_50900	ATGAAAAAGATTTTTTCCTTAGTGCTGTTAGGCATAGCACTCTTCACTTTTGCCTTCAGCAGCCCAGCATTGGCGGCAGATAGTGTCAATGGAGCGAAAATATTTAGTGCTAATTGTGCTTCTTGCCATGCCGGCGGCAAGAACTTAGTTCAAGCCAACAAAAATCTCAAGAAAGATGCTTTGGAACAGTTTGGTATGTACTCAGCCCAAGCCATTATTGCTCAAGTCACCAATGGTAAAAACGCCATGCCTGCTTTCAAGGGTCGTTTAAAACCTGAACAAATTGAAGATGTAGCTGCTTATGTTCTAGAACAAGCAGACAAGGATTGGAAATAG	MKKIFSLVLLGIALFTFAFSSPALAADSVNGAKIFSANCASCHAGGKNLVQANKNLKKDALEQFGMYSAQAIIAQVTNGKNAMPAFKGRLKPEQIEDVAAYVLEQADKDWK	ADSVNGAKIFSANCASCHAGGKNLVQANKNLKKDALEQFGMYSAQAIIAQVTNGKNAMPAFKGRLKPEQIEDVAAYVLEQADKDWK
Cytochrome c6	Nostoc sp. PCC 7107	Nos7107_3943	ATGAAGAAAATCATTTCAGTTATGCTGTTAGGTATTGCTATCTTTACATTTGCCTTCAGCAGCCCAGCTTTAGCAGCCGATACCGTCAATGGAGCTAAAGTATTTAGTGCTAATTGTGCTTCTTGTCACGCAGGTGGTAAGAATTTAGTTAATGCTCAAAAGACCTTGAAGAAAGAAGATTTAGAAAAGTATGGTATGAACTCAGCAGAGGCTATTATTGCCCAAGTAACAAAGGGTAAAAATGCTATGCCTGCTTTCACAGGTCGTCTAAAATCTAACCAAATTGAAGATGTAGCTGCTTACGTACTAGGACAAGCAGACAAAGCTTGGAAGTAG	MKKIISVMLLGIAIFTFAFSSPALAADTVNGAKVFSANCASCHAGGKNLVNAQKTLKKEDLEKYGMNSAEAIIAQVTKGKNAMPAFTGRLKSNQIEDVAAYVLGQADKAWK	ADTVNGAKVFSANCASCHAGGKNLVNAQKTLKKEDLEKYGMNSAEAIIAQVTKGKNAMPAFTGRLKSNQIEDVAAYVLGQADKAWK
Cytochrome c6	Nostoc sp. PCC 7120 = FACHB-418	alr4251	ATGAAAAAGATTTTTTCCCTAGTACTGTTAGGCATAGCACTCTTCACTTTTGCCTTCAGTAGCCCTGCATTAGCAGCAGACAGTGTAAATGGAGCCAAGATATTCAGTGCTAACTGCGCTTCTTGCCATGCAGGTGGCAAGAATTTGGTTCAAGCACAGAAAACTCTGAAGAAAGCCGATTTGGAAAAATATGGGATGTACTCAGCAGAGGCAATCATTGCCCAGGTAACAAACGGTAAGAACGCCATGCCTGCTTTCAAAGGTCGCTTAAAACCTGAACAAATTGAAGATGTAGCTGCTTACGTGCTAGGAAAAGCCGATGCAGATTGGAAGTAA	MKKIFSLVLLGIALFTFAFSSPALAADSVNGAKIFSANCASCHAGGKNLVQAQKTLKKADLEKYGMYSAEAIIAQVTNGKNAMPAFKGRLKPEQIEDVAAYVLGKADADWK	ADSVNGAKIFSANCASCHAGGKNLVQAQKTLKKADLEKYGMYSAEAIIAQVTNGKNAMPAFKGRLKPEQIEDVAAYVLGKADADWK
Cytochrome c6	Nostoc sp. RF31YmG	BV378_24785	ATGAAGAAGTTTTTTTCAATAATACTGTTGGGCATAGCAATCTTCACCTTTGCCTTCAGTAATTCAGCTTTAGCAGCAGACACTGTAAGTGGAGCCAAAGTATTTAGTGCTAATTGTGCTTCTTGTCATGCAGGAGGAAAAAATTTGGTTCAAGCCGACAAGAATCTGAAAAAAGATGCTTTGGAAAAATACAATATGTACTCAGCAGAGGCGATTATCAGCCAAGTAACCAAAGGTAAAAATGCTATGCCTGCTTTTAAAGGACGTTTGAATAGCAGCCAAATTGAAGATGTAGCTGCTTACGTACTTGAACAAGCAGATAAAGGTTGGTAA	MKKFFSIILLGIAIFTFAFSNSALAADTVSGAKVFSANCASCHAGGKNLVQADKNLKKDALEKYNMYSAEAIISQVTKGKNAMPAFKGRLNSSQIEDVAAYVLEQADKGW	ADTVSGAKVFSANCASCHAGGKNLVQADKNLKKDALEKYNMYSAEAIISQVTKGKNAMPAFKGRLNSSQIEDVAAYVLEQADKGW
Cytochrome c6	Nostoc sp. T09	BV372_34635	ATGAAAAGGTTTTTTTCAATAATACTGTTAGGCATAGCCATCTTCACCTTTGCCTTCAGTAATGCAGCTTTAGCAGCAGACACTGTAAGTGGAGCCAAAGTATTTAGTGCTAATTGTGCTTCTTGTCATGCAGGTGGTAAAAATTTGGTTCAAGCTGACAAGAGCCTGAAAAAAGATGCCTTGGAAAAATACAGTATGTATTCAGCAGAGGCGATTATCAGCCAAGTAACAAAGGGTAAAAATGCTATGCCTGCTTTTAAAGGTCGTTTAAATAGCAGCCAAATTGAAGATGTAGCTGCTTACGTACTTGAACAAGCAGATAAAGGTTGGTAA	MKRFFSIILLGIAIFTFAFSNAALAADTVSGAKVFSANCASCHAGGKNLVQADKSLKKDALEKYSMYSAEAIISQVTKGKNAMPAFKGRLNSSQIEDVAAYVLEQADKGW	ADTVSGAKVFSANCASCHAGGKNLVQADKSLKKDALEKYSMYSAEAIISQVTKGKNAMPAFKGRLNSSQIEDVAAYVLEQADKGW
Cytochrome c6	Nostoc sphaeroides CCNUC1	GXM_01753	ATGAAAAAAATTATTACAGTGATGCTGTTAGGCATAGCAATCTTTACTTTTGCCTTCAGTAGTCCAGCTTTGGCAGCAGATGCTGTTAGTGGAGCTAAAGTATTTAGTGCTAATTGTGCCTCTTGTCATGCGGGAGGGAAAAATCTGGTTAATGCTGCCAAAAGCCTGAAGAAAGCGGATTTGGAAAAGTATGGTTTGTACTCAGCAGACAAGATTATTGCTCAGGTTACAAAAGGTAAAGGTGCTATGCCCGCCTTCGGCAACCGTTTGAAGGCTGACAAAATTGAAGATGTAGCTGCTTATGTGCTTTCACAAGCAGATAAGGACTGGAAGTAG	MKKIITVMLLGIAIFTFAFSSPALAADAVSGAKVFSANCASCHAGGKNLVNAAKSLKKADLEKYGLYSADKIIAQVTKGKGAMPAFGNRLKADKIEDVAAYVLSQADKDWK	ADAVSGAKVFSANCASCHAGGKNLVNAAKSLKKADLEKYGLYSADKIIAQVTKGKGAMPAFGNRLKADKIEDVAAYVLSQADKDWK
Cytochrome c6	Oscillatoria nigro-viridis PCC 7112	Osc7112_4834	TTGAAAAGACTCTTATCGATCGCCCTGTTAGCGATCGCAATTTTTACCGTTGGCTTTGGCCGCCCTGCTTTGGCAGGAGATGCCGCTAACGGAGCTAAAATCTTTAGCGCCAACTGTGCTGCTTGTCACATCGGTGGCGGCAACGTGGTTATGGCTATGAAAACCTTGAAAAAGGAAGCTCTTGAAAAGTACGGCATGAATTCTCTGGAAGCTATTACCACTCAGGTAACTAAGGGCAAAAATGCTATGCCTGCTTTCGCCGGCCGCTTGAAGCCCGAACAAATCGAGGATGTAGCAACCTACGTGCTCTCGCAATCTGAGAAAGACTGGAAAGGCTAA	MKRLLSIALLAIAIFTVGFGRPALAGDAANGAKIFSANCAACHIGGGNVVMAMKTLKKEALEKYGMNSLEAITTQVTKGKNAMPAFAGRLKPEQIEDVATYVLSQSEKDWKG	GDAANGAKIFSANCAACHIGGGNVVMAMKTLKKEALEKYGMNSLEAITTQVTKGKNAMPAFAGRLKPEQIEDVATYVLSQSEKDWKG
Cytochrome c6	Phormidesmis priestleyi ULC007	C7B65_18225	ATGAGAACCCTACTCGCAACGGTTTTGATGATGATTGCATCACTGACTTTCATGGTTGCTCAACCTGCTTGGGCAGATGCAGATCTGGTGACAGGTGCGAAAGTTTTTTCTGCAAACTGCGCTTCTTGTCATATTGGTGGCAAAAATGTTATAAACGCTCCCAAAACGCTCAAAAAGGAAGCACTGGCCAAGTACGCAATGAACAGCAGCGAGGCGATCGTCACTCAGGTGACTAATGGCAAAGGTGCCATGCCTAAGTTTAAAGGTCGCTTGACTGATGACCAAATTCAGTCGGTTGCGGCTTATAGCGGTTCCCGCATGAATGAAGTACATCAGATCCTTACTGCACAGGCATTATAG	MRTLLATVLMMIASLTFMVAQPAWADADLVTGAKVFSANCASCHIGGKNVINAPKTLKKEALAKYAMNSSEAIVTQVTNGKGAMPKFKGRLTDDQIQSVAAYSGSRMNEVHQILTAQAL	ADLVTGAKVFSANCASCHIGGKNVINAPKTLKKEALAKYAMNSSEAIVTQVTNGKGAMPKFKGRLTDDQIQSVAAYSGSRMNEVHQILTAQAL
Cytochrome c6	Phormidium ambiguum IAM M-71	NIES2119_03495	GTGAAAAAGATTTTGGCGCTAATTTTGCTGTTGAGTATAGTATTCAATTTTACCTTTGTCCGTCCCGTTTTCGCGGGTGATGCTGCTAAAGGTGCGAAACTTTTTGACGCTAATTGTGCTGCTTGTCATGCGGGAGGGAAAAATTTAGTTAATCCTACAAAGACTTTGGCCAAAGCTGATTTAGATAAGTATGGCATGAATTCTTTAGAAGCAATTGTTACTCAGGTAACAAAAGGTAAAGCTGCTATGCCTGCTTTTCAAGGTAAACTCAACGCTGAACAAATTGAAGATGTCGCTACGTATGTGTTAGAAACTTCCGAAAAAGGTTGGAAATAA	MKKILALILLLSIVFNFTFVRPVFAGDAAKGAKLFDANCAACHAGGKNLVNPTKTLAKADLDKYGMNSLEAIVTQVTKGKAAMPAFQGKLNAEQIEDVATYVLETSEKGWK	GDAAKGAKLFDANCAACHAGGKNLVNPTKTLAKADLDKYGMNSLEAIVTQVTKGKAAMPAFQGKLNAEQIEDVATYVLETSEKGWK
Cytochrome c6	Phormidium tenue NIES-30	NIES30_17925	ATGCGAAAACTTGCTTTAGCAATAGCGGCGGTCGTAACCGTCCTCACCCTGTGGATGGCTCCAGTGGCTCAGGCGGCAGATCTGGATCACGGTGGCCAGCTCTTTGGCAACAACTGTGCGGCTTGCCACATCGGCGGCAGTAACGTGGTCAACGGAGCTAAAACTCTGAAGCAGGCCGACCTAGAAAAGTACGAGATGGCGTCGATAGAAGCCATTACGAGCCAAGTCACCAACGGCAAAAATGCCATGCCTGCCTTTAAGGGGCGGCTCAGCAATGACGATATTGCCGATGTGGCGGCCTACGTGCTCAGTCAGGCGGAGCAGGGTTGGTAG	MRKLALAIAAVVTVLTLWMAPVAQAADLDHGGQLFGNNCAACHIGGSNVVNGAKTLKQADLEKYEMASIEAITSQVTNGKNAMPAFKGRLSNDDIADVAAYVLSQAEQGW	ADLDHGGQLFGNNCAACHIGGSNVVNGAKTLKQADLEKYEMASIEAITSQVTNGKNAMPAFKGRLSNDDIADVAAYVLSQAEQGW
Cytochrome c6	Planktothricoides sp. SR001	AM228_22535	TTGAAGAAACTATTATCAATTTTCTTGGTTGCGATCGCCGTCCTGACTGTGGCGTTCGTTCCTCCAGCCCAAGCTGGAGATGCTGCCGCTGGCGCCAAAATCTTTACCGCCAACTGCACTGCTTGCCACATGAATGGTAACAATGTGGTCATGGCCCCCAAAACCCTGAAAAAAGATGCTTTAGAAACTTACGGAATGTATTCCAAAGAAGCCATCATTACCCAGGTGACAAAAGGTAAAGGTGCTATGCCCGCATTTGGTGGTCGTTTGAGCGATGCTGATATTGAAAACGTCGCTACCTACGTCCTCGAACAAGCTGATAAAGGCTGGTAA	MKKLLSIFLVAIAVLTVAFVPPAQAGDAAAGAKIFTANCTACHMNGNNVVMAPKTLKKDALETYGMYSKEAIITQVTKGKGAMPAFGGRLSDADIENVATYVLEQADKGW	GDAAAGAKIFTANCTACHMNGNNVVMAPKTLKKDALETYGMYSKEAIITQVTKGKGAMPAFGGRLSDADIENVATYVLEQADKGW
Cytochrome c6	Planktothrix agardhii CCAP 1459/11A	PA905_28850	ATGAAAAAAATAATTTCAGTTTTGTTAGTCATGACCGTCGCTATTTTAACTTTTGTTCCCAGTGCCTTCGCCGCCGATTTAGCAAGTGGAGCTAAAATATTTGCGTCAAATTGTGCATCTTGTCACGCCGGGGGGAGAAACTTAATTAATGCGAGCAAAACTTTGAAAAAATCGGATCTGGAAAAATATGGGATGTATGATCTCCAGGCAATTATAACCCAAGTAACAAATGGGAAAGCAGCCATGCCTAGCTTCAAAGGTCGTTTAAAAGACAATCAAATTGCCGATGTTGCCGCTTATGTATTAGCTCAAGCGGATAAAGACTGGAAAAAGTAA	MKKIISVLLVMTVAILTFVPSAFAADLASGAKIFASNCASCHAGGRNLINASKTLKKSDLEKYGMYDLQAIITQVTNGKAAMPSFKGRLKDNQIADVAAYVLAQADKDWKK	ADLASGAKIFASNCASCHAGGRNLINASKTLKKSDLEKYGMYDLQAIITQVTNGKAAMPSFKGRLKDNQIADVAAYVLAQADKDWKK
Cytochrome c6	Planktothrix paucivesiculata PCC 9631	PL9631_970104	ATGAAAAAAATAATCTCAGTTTTGTTAGTCATGACCGTGGCTATTTTAACTTTTGTTCCTAGTGCCTTCGCCGCCGATTTAGCAAGTGGAGCTAAAATATTTTCGTCAAATTGTGCATCTTGTCACGCCGGAGGGAAAAACTTAGTTAATGCGAGAAAAACTTTGAAAAAAGCGGATCTGGAAAAATATGGGATGTATGATCTCCAGGCAATTATAACCCAAGTAACAAATGGGAAAGCAGCCATGCCCGGCTTCAAAGGTCGTTTAAAAGACGATCAAATTGCCGATGTTGCCGCTTATGTATTAGCTCAAGCCGATCAAGATTGGAAAAAGTAA	MKKIISVLLVMTVAILTFVPSAFAADLASGAKIFSSNCASCHAGGKNLVNARKTLKKADLEKYGMYDLQAIITQVTNGKAAMPGFKGRLKDDQIADVAAYVLAQADQDWKK	ADLASGAKIFSSNCASCHAGGKNLVNARKTLKKADLEKYGMYDLQAIITQVTNGKAAMPGFKGRLKDDQIADVAAYVLAQADQDWKK
Cytochrome c6	Planktothrix serta PCC 8927	PL8927_30019	ATGAAAAAGTTAATCTCAGCCTTGTTAATCATGGTAGTGGCCGTTTTGAGTTTTGTCCCGAATGCCTTCGCCGCCGATTTAGCAAATGGGGCTAAAGTATTTTCGGCAAATTGTGCCTCTTGTCATGCGGGTGGAAAAAATCTAGTCAATGCTACGAAAAGCTTAAAAAAAGCAGATCTGGAAAAATATGGGATGTATAGTCTTGAGGCAATCACAGCCCAAGTCACCAAAGGGAAAGCTGCAATGCCGAGTTTCTTGGGCCGTTTAAAACCAGACCAAATTGATGATGTTGCGGCTTATGTGTTAGCTCAAACAGATCAGGATTGGAAAAAGTAA	MKKLISALLIMVVAVLSFVPNAFAADLANGAKVFSANCASCHAGGKNLVNATKSLKKADLEKYGMYSLEAITAQVTKGKAAMPSFLGRLKPDQIDDVAAYVLAQTDQDWKK	ADLANGAKVFSANCASCHAGGKNLVNATKSLKKADLEKYGMYSLEAITAQVTKGKAAMPSFLGRLKPDQIDDVAAYVLAQTDQDWKK
Cytochrome c6	Planktothrix sp. PCC 11201	PL11201_470091	ATGAAAAAGTTAATCTCAGCCTTGTTAATCATTGCTGTAACTGTTTTAAGTTTTGTTCCTAATGCCTTCGCCGCCGATTTAGCAAGTGGGGCTAAAGTATTTTCAGCAAATTGCGCTTCTTGTCATGCTGGGGGTAAAAACCTGATCAATGCTGCGAAAAGTTTGAAAAAAGCCGATCTCGAAAAATATGGGATGTATGATGTCGAGAAAATCAAAACCCAAGTGACAAATGGTAAAGCTGCAATGCCCAGTTTCAAAGGTCGTTTAAAAGACGATCAAATTGCTGATGTTGCAGCTTATGTATTAGCTCAAGCGGATAAAGAATGGAAAAAGTAA	MKKLISALLIIAVTVLSFVPNAFAADLASGAKVFSANCASCHAGGKNLINAAKSLKKADLEKYGMYDVEKIKTQVTNGKAAMPSFKGRLKDDQIADVAAYVLAQADKEWKK	ADLASGAKVFSANCASCHAGGKNLINAAKSLKKADLEKYGMYDVEKIKTQVTNGKAAMPSFKGRLKDDQIADVAAYVLAQADKEWKK
Cytochrome c6	Planktothrix tepida PCC 9214	PL9214490102	ATGAAAAAGAAGTTAATCTCAGCCTTGTTAATGATTGCAGTGGCTGTTTTAATTGTTGTTCCTAGTGCATTGGCTGGAGATGTAGCAAATGGAGGTAAAGTATTTTCAGCAAATTGTGCATCTTGTCATGCTGGTGGAAAAAATCTAGTCAATGCTAAATATACCTTACAAAAAGCAGATCTCGAAAAATATGGAATGTATAGTATTGAGGCAATCACAGCCCAAGTTACAAACGGGAAAAATGCCATGCCAGCTTTCAAAGGTCGTTTAAAACCAGAACAAATTGCTGATGTTGCGACTTATGTGTTGTCTCAAGCCGATCAAGGTTGGCCAAAGTAA	MKKKLISALLMIAVAVLIVVPSALAGDVANGGKVFSANCASCHAGGKNLVNAKYTLQKADLEKYGMYSIEAITAQVTNGKNAMPAFKGRLKPEQIADVATYVLSQADQGWPK	GDVANGGKVFSANCASCHAGGKNLVNAKYTLQKADLEKYGMYSIEAITAQVTNGKNAMPAFKGRLKPEQIADVATYVLSQADQGWPK
Cytochrome c6	Pleurocapsa sp. CCALA 161	C7B62_09685	ATGTTTGCCAAACTTTTATCGACGTTGTTAGTATTGTTGACTGCTGCAATGTTCACCCTCGCTACTCCTGCAATTGCGGGGGATGCTGCTAGCGGAGGTAAAATTTTTAGCGCTAACTGCGCTGCTTGTCATGCAGGGGGAAGAAATGTAATTAACGGAGCTAAAACCCTGCAAAAAGATGCTCTCGATAAGTATGAAATGAATTCCCTTGAGGCCATTACCAATCAAATCATTAATGGAAAAAATGCGATGCCAGCATTTAAAGGTCGTTTGACTGATGCTCAAATTGATGATGTAGCAACCTATGTCTTGTCTCAAGCGGAAAATGGTTGGTAG	MFAKLLSTLLVLLTAAMFTLATPAIAGDAASGGKIFSANCAACHAGGRNVINGAKTLQKDALDKYEMNSLEAITNQIINGKNAMPAFKGRLTDAQIDDVATYVLSQAENGW	GDAASGGKIFSANCAACHAGGRNVINGAKTLQKDALDKYEMNSLEAITNQIINGKNAMPAFKGRLTDAQIDDVATYVLSQAENGW
Cytochrome c6	Pseudanabaena biceps PCC 7429	Pse7429DRAFT_0088	ATGAAACGCATTTTCTCTATTTTAGCGATCGCGCTGACCATGTTTTTGGGGCTATCCTTTAGCCAACCTGCCTTTGCCGAACAGACCTCAGGTCAAAAAGTTTTTAGTTCAAACTGCGCTTCCTGTCATGCAGGCGGCACAAACCGAGTAGTAGCAGCCAAAAACTTGAAAAAAGATGCCTTAGAAAAGTATGGCAAATACTCGGTTGAGGCAATCGTCGCCCAAGTTACGAAGGGGAAAGGTGCAATGCCTGCTTTTGGCAAAAAACTCACTGCTAATGAAATTAATCTAGTCGCAAACTATGTGATCGAGCAAGCTGACAATGGCTGGGCAAAAAGCTAG	MKRIFSILAIALTMFLGLSFSQPAFAEQTSGQKVFSSNCASCHAGGTNRVVAAKNLKKDALEKYGKYSVEAIVAQVTKGKGAMPAFGKKLTANEINLVANYVIEQADNGWAKS	AEQTSGQKVFSSNCASCHAGGTNRVVAAKNLKKDALEKYGKYSVEAIVAQVTKGKGAMPAFGKKLTANEINLVANYVIEQADNGWAKS
Cytochrome c6	Pseudanabaena sp. SR411	B9G53_12535	ATGAAACGCATTTTTTCTATTCTTGCGATCGCCTTAACAATCTTGGTGAGTCTTGCTTTCGGGCAACCAGCTTTTGCTGAAGTGTCCGCAGGCGCAAAAATCTTTAACAATAACTGCGCTCAATGTCATGCAGGTGGCAAAAATAATGTAGTCGCGGCTAAAACCTTGAAAGCGGATGCCTTGGAAAAGTATGGCAAGAACACAGTTGAAGCAATTTCTCTGCAAGTTTCTAAGGGTAAAGGCGCAATGCCTGCCTTTGGGAAAAAACTTAGCGCTGATGAAATTACCCTAGTTGCGAACTATGTACTTGACCAAGCTGAGAAAGGTTGGCCAAAATCATAA	MKRIFSILAIALTILVSLAFGQPAFAEVSAGAKIFNNNCAQCHAGGKNNVVAAKTLKADALEKYGKNTVEAISLQVSKGKGAMPAFGKKLSADEITLVANYVLDQAEKGWPKS	AEVSAGAKIFNNNCAQCHAGGKNNVVAAKTLKADALEKYGKNTVEAISLQVSKGKGAMPAFGKKLSADEITLVANYVLDQAEKGWPKS
Cytochrome c6	Raphidiopsis brookii D9	CRD_02174	ATGAAGAGAATTATTTCCGTATTGCTACTGGGTATTGCAATTTTCACACTTACCTTCACCAATTCAGCTTTAGCAGTAGATGCAACAATTGGGGCAAGTGTATTTAAAGCTAATTGTGCCCAATGTCACATTGGTGGTAAGAATTTGGTTAATGCAGCTAAGACTCTCAAGAAAGAGGCTTTAGAAAAGTATGGTATGTACTCCCAAGAAGCCATTGTTACACAAGTTACAAAGGGTAAAGGTGCTATGCCCGCATTCGGTAAGAGACTGAAACAGAATCAAATTGAGAATGTGGCAGCTTATGTACTAGAACAAGCGGGTAAAGGCTGGAAGAATTAG	MKRIISVLLLGIAIFTLTFTNSALAVDATIGASVFKANCAQCHIGGKNLVNAAKTLKKEALEKYGMYSQEAIVTQVTKGKGAMPAFGKRLKQNQIENVAAYVLEQAGKGWKN	VDATIGASVFKANCAQCHIGGKNLVNAAKTLKKEALEKYGMYSQEAIVTQVTKGKGAMPAFGKRLKQNQIENVAAYVLEQAGKGWKN
Cytochrome c6	Scytonema hofmannii PCC 7110	WA1_48865	ATGAAAAAATTTGTTGCAGTGCTGTTGCTGGCTATAGCAATATTTACTTTTGCTTTCAACCGTCCTGCTTTGGCATCTGATACCGTCAAGGGAGCCAAAATCTTTAACGCCAATTGTGCTTCTTGTCATGCGGGTGGTAAGAACTTAGTTCAAGCTCAGAAAAGCTTGAAGAAAGATGCCTTAGACAAGTACGAGATGAACTCACCTGACGCCATCATTGCCCAAGTCACAAAGGGTAAAAATGCAATGCCTGCCTTCAAAGGTCGTTTGAAACCTGAGGAAATTGAAGATGTAGCAGCATATGTGCTAGACGAAGCTAATAATAAGGAATGGAAGTAA	MKKFVAVLLLAIAIFTFAFNRPALASDTVKGAKIFNANCASCHAGGKNLVQAQKSLKKDALDKYEMNSPDAIIAQVTKGKNAMPAFKGRLKPEEIEDVAAYVLDEANNKEWK	SDTVKGAKIFNANCASCHAGGKNLVQAQKSLKKDALDKYEMNSPDAIIAQVTKGKNAMPAFKGRLKPEEIEDVAAYVLDEANNKEWK
Cytochrome c6	Scytonema sp. HK-05	NIES2130_24275	ATGAAAAAGATTTTTTTAGTATTGTTGCTGGGCATAGCAATTTTTACCTTTGCCTTGAATCGTCCAGCTTTTGCTGCAGATGCTGTTAAGGGAGCCAAAGTCTTCTCTACCAATTGCGCTTCTTGTCATGCGGGTGGAAAGAATTTGGTTCAAGCTAACAAGAACCTGACAAAGGAGGCTTTGGAAAAGTATGGAATGTACTCTGAGGAAGCCATTATCGCTCAAGTGACAAATGGTAAAAATGCCATGCCCGCTTTCAAAGGTCGTTTAAAACCCGAGCAAATTGAAGATGTAGCTGCATATGTGCTGGGAAAAGCCGATAAAAGCTGGAAGTGA	MKKIFLVLLLGIAIFTFALNRPAFAADAVKGAKVFSTNCASCHAGGKNLVQANKNLTKEALEKYGMYSEEAIIAQVTNGKNAMPAFKGRLKPEQIEDVAAYVLGKADKSWK	ADAVKGAKVFSTNCASCHAGGKNLVQANKNLTKEALEKYGMYSEEAIIAQVTNGKNAMPAFKGRLKPEQIEDVAAYVLGKADKSWK
Cytochrome c6	Sphaerospermopsis reniformis	SR1949_28040	ATGAAAAAGATAATTTCCGTATTACTGTTAGGCATAACCATCTTCACTTTTGCCTTCAGTAGTCCCGCTTTAGCAGCAGATACAGTTGCTGGAAAAGCAGTATTTACAGCTAATTGCGCTCAATGTCATGCGGGGGGTAAAAATTTAGTTAATGCTGCTAAAAGCTTGAAAAAAGAAGCTTTGGAAAAGTACGGTATGTACTCTGATGAAGCTATTATTACTCAAATTACAAACGGCAAGGGTGCGATGCCAGCCTTTGGTAAGCGCATAAAAACCGAAAACATTGAAAATGTAGCTGCTTATGTGTTGGAACAAGCAGATAAAAATTGGAAGTAA	MKKIISVLLLGITIFTFAFSSPALAADTVAGKAVFTANCAQCHAGGKNLVNAAKSLKKEALEKYGMYSDEAIITQITNGKGAMPAFGKRIKTENIENVAAYVLEQADKNWK	ADTVAGKAVFTANCAQCHAGGKNLVNAAKSLKKEALEKYGMYSDEAIITQITNGKGAMPAFGKRIKTENIENVAAYVLEQADKNWK
Cytochrome c6	Sphaerospermopsis reniformis	SR1949_28050	ATGAGAAAGATTATTTCTGTATTACTATTAGGCATCACTATCTTCACCTTTGCCTTCATTAATCCTGCTTTCGCTGCTGACACTGGTGCTGGAGAAAAAATATTTACAGCTAATTGTGCTTCTTGTCATGCAGGTGGTAAAAATTTAGTTAATGCTGCTAAAAGTTTGAGTAAGGCAGACTTAGAAGAGTACAATATTTACTCTGAATCTGCTATTATTGCTCAAGTTACAAACGGTAAAAATGCTATGCCAGCTTTCAAAAATAATTTGTCAGCTGATGATATTGCCAATGTAGCTGCTTACGTCATGGAAAAAGCGGAAGCTGGCTGGTAA	MRKIISVLLLGITIFTFAFINPAFAADTGAGEKIFTANCASCHAGGKNLVNAAKSLSKADLEEYNIYSESAIIAQVTNGKNAMPAFKNNLSADDIANVAAYVMEKAEAGW	ADTGAGEKIFTANCASCHAGGKNLVNAAKSLSKADLEEYNIYSESAIIAQVTNGKNAMPAFKNNLSADDIANVAAYVMEKAEAGW
Cytochrome c6	Stanieria cyanosphaera PCC 7437	Sta7437_1575	ATGTTAAAGAGATTACTGTCAATAAGCATCAGCTTGTTGATAACCTTGTTTGCGCTAGCTAATCCTGCTTTAGCTGGAGATGCTGGCAACGGTGCCAAAATTTTTAATGCCAACTGCGCTGCTTGTCATTCGGGAGGCAACAACTTAGTTAACGCTACAAAAACTTTGAAAAAAGACGCTTTAGAAAAATATGGGATGTATTCTGCTGAAGCAGTTATTGCTCAGGTAACTAATGGAAAAAATGCTATGCCATCTTTTAAAGGGCGTTTAAATGACCAACAAATTGAGGATGTTGCTGCTTATGTAATTTCTCAAGCAGATAAAGGTTGGTAA	MLKRLLSISISLLITLFALANPALAGDAGNGAKIFNANCAACHSGGNNLVNATKTLKKDALEKYGMYSAEAVIAQVTNGKNAMPSFKGRLNDQQIEDVAAYVISQADKGW	GDAGNGAKIFNANCAACHSGGNNLVNATKTLKKDALEKYGMYSAEAVIAQVTNGKNAMPSFKGRLNDQQIEDVAAYVISQADKGW
Cytochrome c6	Stanieria sp. NIES-3757	STA3757_05330	ATGTTGAAGAAATTACTGTCAATAAGCATCAGCTTGTTGATAACTTGGTTTGCTGTAGCTAATCCTGCCTTAGCTGGAGATGCCAGCAATGGTGCAAAAATTTTTAATGCCAATTGTGCTGCTTGCCATTCCGGAGGCAACAACCTAGTTAACGCTACAAAAACTTTGAAAAAAGATGCTTTAGAAAAATATGGGATGTATTCTGCTGAAGCAGTTATTACTCAAGTAACTAATGGAAAAAATGCTATGCCATCTTTTAAAGGGCGTTTAAATGATCAACAAATTGAAGATGTTGCTGCTTACGTAATTTCTCAAGCAGACAAAGGTTGGTAA	MLKKLLSISISLLITWFAVANPALAGDASNGAKIFNANCAACHSGGNNLVNATKTLKKDALEKYGMYSAEAVITQVTNGKNAMPSFKGRLNDQQIEDVAAYVISQADKGW	GDASNGAKIFNANCAACHSGGNNLVNATKTLKKDALEKYGMYSAEAVITQVTNGKNAMPSFKGRLNDQQIEDVAAYVISQADKGW
Cytochrome c6	Synechococcus lividus PCC 6715	BRW62_01865	ATGGTGCTGACCCCCGCTGCCGTTGCAGCAGATTTGGCAAATGGCGCAAAAGTCTTTAGTGGGAACTGTGCGGCGTGCCACATGGGTGGTGGCAATGTGGTCATGGCCAACAAAACCCTTAAAAAAGAAGCCCTCGAACAATTTGGCATGAACTCTGAAGATGCCATTATTTACCAAGTGCAACACGGCAAAAACGCTATGCCTGCCTTTGCTGGCCGCTTAACGGACGAGCAAATTCAAGACGTGGCCGCCTACGTGCTGGATCAAGCCGCCAAAGGTTGGGCTGGCTAA	MVLTPAAVAADLANGAKVFSGNCAACHMGGGNVVMANKTLKKEALEQFGMNSEDAIIYQVQHGKNAMPAFAGRLTDEQIQDVAAYVLDQAAKGWAG	ADLANGAKVFSGNCAACHMGGGNVVMANKTLKKEALEQFGMNSEDAIIYQVQHGKNAMPAFAGRLTDEQIQDVAAYVLDQAAKGWAG
Cytochrome c6	Thermosynechococcus elongatus BP-1	tll1283	TTGAAAAAGCGATTCATTAGTGTTTGCGCGATCGCGATCGCGCTATTGGTCAGCCTCACCCCTGCGGCCTTAGCAGCAGATCTCGCCAACGGCGCCAAAGTCTTTAGCGGTAACTGCGCAGCCTGTCACATGGGGGGTGGCAATGTGGTAATGGCCAACAAAACCCTGAAAAAAGAAGCCCTTGAGCAATTTGGCATGTACTCTGAGGATGCCATTATCTACCAAGTGCAGCACGGCAAAAATGCGATGCCCGCTTTTGCTGGTCGTCTCACCGATGAACAGATTCAAGACGTGGCAGCCTATGTGCTCGATCAAGCAGCCAAGGGTTGGGCAGGCTAA	MKKRFISVCAIAIALLVSLTPAALAADLANGAKVFSGNCAACHMGGGNVVMANKTLKKEALEQFGMYSEDAIIYQVQHGKNAMPAFAGRLTDEQIQDVAAYVLDQAAKGWAG	ADLANGAKVFSGNCAACHMGGGNVVMANKTLKKEALEQFGMYSEDAIIYQVQHGKNAMPAFAGRLTDEQIQDVAAYVLDQAAKGWAG
Cytochrome c6	Thermosynechococcus sp. NK55a	NK55_03345	TTGAAAAAGCTATTCATTAGTGTTTGCGCGATTGCAATGGTTCTATTTGTCGGCCTTACCCCTGTGGCCTTTGCGGCAGATTTGGCCAATGGTGCCAAAGTCTTTAGCGGTAACTGCGCAGCCTGTCACATGGGGGGCGGCAATGTGGTAATGGCGAACAAAACCCTGAAAAAAGAAGCCCTTGAGCAATTTGGCATGTACTCTGAGGATGCCATTATCTACCAAGTGCAGCACGGCAAAAATGCAATGCCCGCTTTTGCCGGTCGTCTCACCGATGAACAAATTCAAGATGTGGCCGCCTACGTGCTCGATCAAGCCGCTAAGGGTTGGGCAGGTTAG	MKKLFISVCAIAMVLFVGLTPVAFAADLANGAKVFSGNCAACHMGGGNVVMANKTLKKEALEQFGMYSEDAIIYQVQHGKNAMPAFAGRLTDEQIQDVAAYVLDQAAKGWAG	ADLANGAKVFSGNCAACHMGGGNVVMANKTLKKEALEQFGMYSEDAIIYQVQHGKNAMPAFAGRLTDEQIQDVAAYVLDQAAKGWAG
Cytochrome c6	Thermosynechococcus vulcanus NIES-2134	NIES2134_112740	TTGAAAAAGCGATTCATTAGTGTTTGCGCGATCGCGATCGCGCTATTTGTCAGCCTCACCCCTGCGGCCTTAGCAGCAGATCTCGCCAACGGCGCCAAAGTCTTTAGCGGTAACTGCGCAGCCTGTCACATGGGGGGTGGCAATGTGGTGATGGCCAACAAAACCCTGAAAAAAGAAGCCCTTGAGCAATTTGGCATGTACTCTGAGGATGCCATTATCTACCAAGTGCAGCACGGCAAAAATGCGATGCCCGCTTTTGCTGGTCGTCTCACCGATGAACAGATTCAAGACGTGGCAGCCTATGTGCTCGATCAAGCAGCCAAGGGTTGGGCAGGCTAA	MKKRFISVCAIAIALFVSLTPAALAADLANGAKVFSGNCAACHMGGGNVVMANKTLKKEALEQFGMYSEDAIIYQVQHGKNAMPAFAGRLTDEQIQDVAAYVLDQAAKGWAG	ADLANGAKVFSGNCAACHMGGGNVVMANKTLKKEALEQFGMYSEDAIIYQVQHGKNAMPAFAGRLTDEQIQDVAAYVLDQAAKGWAG
Cytochrome c6	Tolypothrix sp. PCC 7601	FDUTEX481_01762	ATGAAAAAGATTATTTCAGTGCTGTTTCTAGGTGTAGCGATTTTCACTTTTGCCTTCAATAATCCAGCTTTAGCAGCAGACGCAGCTAGTGGAGCTAAAATCTTTAGTGCCAATTGTGCTTCTTGTCACGCAGGTGGTAAGAACTTGGTTCAAGCTAACAAAACTTTGAAAAAAGATGCTTTAGAAAAGTTTGGAATGTACTCGGCAGAAGCGATTATCACTCAAGTTACAAACGGTAAAAACGCTATGCCTGCTTTCAAAGGTCGTTTAAAACCAAATCAAATTGAAGATGTAGCAGCATATGTGTTGGGGCAAGCAGACAAGGATTGGAAATAA	MKKIISVLFLGVAIFTFAFNNPALAADAASGAKIFSANCASCHAGGKNLVQANKTLKKDALEKFGMYSAEAIITQVTNGKNAMPAFKGRLKPNQIEDVAAYVLGQADKDWK	ADAASGAKIFSANCASCHAGGKNLVQANKTLKKDALEKFGMYSAEAIITQVTNGKNAMPAFKGRLKPNQIEDVAAYVLGQADKDWK
Cytochrome c6	Tolypothrix sp. PCC 7601	FDUTEX481_00776	ATGAAGAAGTTTTTTTCAATAGTACTGTTAGGCATAGCAATCTTCACTTTTGCCTTCAGTAAGCCAGCTTTAGCAGCAGATAGTGCTAGTGGAGCCAAGGTATTTAGTGCTAATTGTGCTTCTTGTCATGCAGGTGGAAAAAATTTGGTTCAAGCCAATAAAAACTTGCAGAAAGATGCTTTAGAAAAATACGGTATGTACTCCGCTGATGCCATTATCGCCCAAGTGACAAATGGTAAAAATGCTATGCCTGCTTTCAAAGGACGTTTAAAGCCTAACCAAATTGAAGACGTAGCTGCTTACGTACTTGAAAGTGCAGATAAAGGCTGGAAATAA	MKKFFSIVLLGIAIFTFAFSKPALAADSASGAKVFSANCASCHAGGKNLVQANKNLQKDALEKYGMYSADAIIAQVTNGKNAMPAFKGRLKPNQIEDVAAYVLESADKGWK	ADSASGAKVFSANCASCHAGGKNLVQANKNLQKDALEKYGMYSADAIIAQVTNGKNAMPAFKGRLKPNQIEDVAAYVLESADKGWK
Cytochrome c6	Trichodesmium erythraeum IMS101	Tery_2561	TTGAAAATAATAAAAACGGATTTAACAATAATCTGTGTTCGTACTGACAGAGAAGAACAAATGAAAAAATTACTATCAATTGTGGTCTTAACCATAATGTTTGTTGTTGTTGCGTTACAACCTTCAGCTTTTGCTGCTGATATAGCTAGTGGGAAGGGGGTATTCCAAGGTAACTGTGCAGCTTGCCATATCGGAGGTAAGAATAACATTAACCCTGCAAAGACTTTACAAAAGTCAGATTTAGAAAAATATGGTATGTTTGCAGCGGAGAAAATTATCTACCAGGTGACAAATGGTAAAAATGCAATGCCAGCATTTGGGCGTCGTCTCAAACCTCAACAAATTGAAAATGTTGCAGCTTATGTTATGGCTCAAGCTGAAGGCGGCTGGAAATAA	MKIIKTDLTIICVRTDREEQMKKLLSIVVLTIMFVVVALQPSAFAADIASGKGVFQGNCAACHIGGKNNINPAKTLQKSDLEKYGMFAAEKIIYQVTNGKNAMPAFGRRLKPQQIENVAAYVMAQAEGGWK	ADIASGKGVFQGNCAACHIGGKNNINPAKTLQKSDLEKYGMFAAEKIIYQVTNGKNAMPAFGRRLKPQQIENVAAYVMAQAEGGWK
Cytochrome c6	Trichormus variabilis SAG 1403-4b	DSM107003_09050	ATGAAAAAGATAATTTCAGTATTACTGTTAGGCATAGCTATCTTCACCTTTGCCTTCAGTAGTCCAGCTTTGGCAGATGGAGCTACAGTATTTAGTGCTAACTGTGCTTCTTGTCACGCAGGTGGCAAGAATTTGGTTAACGCTGCTAAAAGCCTCAAGAAGGCAGATTTGGTAAAGTACGAGATGTACTCAGCAGAGGCAATTATTGCCCAAGTTACAAATGGTAAAGCTGCTATGCCTGCTTTTAAGGGTCGTTTAAAACCAGCCCAAATTGACGATGTAGCTGCTTACGTACTGGAACAAGCAGATAAAGATTGGAAGTAA	MKKIISVLLLGIAIFTFAFSSPALADGATVFSANCASCHAGGKNLVNAAKSLKKADLVKYEMYSAEAIIAQVTNGKAAMPAFKGRLKPAQIDDVAAYVLEQADKDWK	PALADGATVFSANCASCHAGGKNLVNAAKSLKKADLVKYEMYSAEAIIAQVTNGKAAMPAFKGRLKPAQIDDVAAYVLEQADKDWK
Cytochrome c6	Tychonema bourrellyi FEM_GT703	CP500_016970	TTGAAAAGACTCTTATCGATCGCTCTGTTAGCGTTGGCAATTTTTACTGTCGGCTTCGGCAGCCCTGCTTTGGCTGGAGACGCTGCTAAAGGAGCTAAACTGTTTCAGAACAACTGCTCTGCTTGTCACGTCGGCGGCGGCAACGTCGTTGTGCGCGCGAAAACCTTGAAAACCGCTGCCCTAGAAAAGTACGGCATGAATTCTCTGGAAGCTATTACCGCTCAGGTAACTAAGGGCAAAAATGCTATGCCTGCTTTCGGGACTCGTTTAAAGCCCAAACAAATTGAGGATGTAGCAACCTACGTGCTCGAACAAGCTGCGAAAAACTGGAAGGGCTAA	MKRLLSIALLALAIFTVGFGSPALAGDAAKGAKLFQNNCSACHVGGGNVVVRAKTLKTAALEKYGMNSLEAITAQVTKGKNAMPAFGTRLKPKQIEDVATYVLEQAAKNWKG	GDAAKGAKLFQNNCSACHVGGGNVVVRAKTLKTAALEKYGMNSLEAITAQVTKGKNAMPAFGTRLKPKQIEDVATYVLEQAAKNWKG
Cytochrome c6	Westiellopsis prolifica IICB1	B4U84_01100	ATGAAAAAGATTTTGTCAGTGTTGCTGCTTGGCATCACAATCTTCACCTTCGCTTTTAATCGCCCTGCTTTAGCCGCAGATGCAGCTAACGGTGCTAAAGTCTTTAGTGCTAATTGTGCTTCTTGTCATGCAGGTGGTAAGAACTTGGTGCAAGCCAATAAAAGCTTGAAAAAAAGCGATTTGGAAAAATATGGCATGAACTCAGCAGAGGCTATCATTGCCCAAGTGACAAATGGTAAAAATGCTATGCCGGCTTTTAAAGCTCGTTTAAAACCTGAGCAGATTGAAAATGTTGCTGCTTATGTGTTAGAAGAAGCTGATAAAGATTGGAAGTAG	MKKILSVLLLGITIFTFAFNRPALAADAANGAKVFSANCASCHAGGKNLVQANKSLKKSDLEKYGMNSAEAIIAQVTNGKNAMPAFKARLKPEQIENVAAYVLEEADKDWK	ADAANGAKVFSANCASCHAGGKNLVQANKSLKKSDLEKYGMNSAEAIIAQVTNGKNAMPAFKARLKPEQIENVAAYVLEEADKDWK
Cytochrome c6BC	Acaryochloris marina	AM1_2756	TTGTTAAAGTTATTCCGTGTCTCGATGGCGTTGAGTCGAAAAGCTGGCTTATGGGTCGGCCTCATACTGATGTGGTTGGGGGTGAATCTTGCCCCGGCCTGGGCTGCCTCTCCTGGGGACGGAGCTGTGCTGTTTGAAACCTACTGTGCAGGCTGTCATCCCAAAGGCGGCAATATTATCCGTCGTCGCAAAACTTTAAAACTGAAATCTTTACAGCGAGACGGCTACGACACCCTAGCCCCCGTCATCAACCTGATTACCCAGGGACAAAACAATATGCCGGGGTTTGCAGACCAGCTCAATGATACGCAAATCGAAACGGTAGCCCAGTTCGTTCTAGAACAAGCGAGCAACAATTGGAAATAA	MLKLFRVSMALSRKAGLWVGLILMWLGVNLAPAWAASPGDGAVLFETYCAGCHPKGGNIIRRRKTLKLKSLQRDGYDTLAPVINLITQGQNNMPGFADQLNDTQIETVAQFVLEQASNNWK	ASPGDGAVLFETYCAGCHPKGGNIIRRRKTLKLKSLQRDGYDTLAPVINLITQGQNNMPGFADQLNDTQIETVAQFVLEQASNNWK
Cytochrome c6BC	Acaryochloris sp. RCC1774	C1752_01038	ATGCGCGGTTTCTTCTCACTGATGTTGATAGTCATCATGGGGCTCACGAGTGCGCCTGCATTGGCGATTTCTAGCTCACCAGGAGGGGCCGAGTTGTTTGAAGTTCACTGCGTAGGCTGCCATCCTCAAGGGAAAAACATCATTCGACGGGGTAAGACGCTGCGGAAAAAGGCGCTGCAAAAAAATAAAGTGGATAGCTTGGATGCGATCGCAACTCTAGTCACCAACGGCAAGGGCAATATGTCCGCCTACGCCGATAAACTGAGCGCACCAGAGATAGAAACGGTCTCAGCCTATGTTCTTGAGCAGGCTGAGCAGGGCTGGCATTAA	MRGFFSLMLIVIMGLTSAPALAISSSPGGAELFEVHCVGCHPQGKNIIRRGKTLRKKALQKNKVDSLDAIATLVTNGKGNMSAYADKLSAPEIETVSAYVLEQAEQGWH	SSSPGGAELFEVHCVGCHPQGKNIIRRGKTLRKKALQKNKVDSLDAIATLVTNGKGNMSAYADKLSAPEIETVSAYVLEQAEQGWH
Cytochrome c6BC	Aliterella atlantica CENA595	UH38_07530	GTGAGTAAGTTAATAGCTATTTTAGTTTTGACGATCGCAATTTTTTGCAGTACGAGTGTTTTTCCTAGTCTGGCTGAACAAAATACTGATGTAGCAACGCTTTTTACTAATAATTGCGCGGGTTGTCATATTAATGGCGGTAATATAGTCAGGCGCGGTAAGAATCTTAAGACAAAAGCGCTGAGAAAATACGGTATGGATTCTGTTGAGGCGATTTCTCAGTTGGTTGCAAATGGTAAAAATGCTATGCCAGCTTATCAAGGTCGGCTAACTGAGCAAGAAATTCTTGATGTGTCTGCCTATGTGTTGGAGCAAGCTGATAAGGGTTGGAAGTAG	MSKLIAILVLTIAIFCSTSVFPSLAEQNTDVATLFTNNCAGCHINGGNIVRRGKNLKTKALRKYGMDSVEAISQLVANGKNAMPAYQGRLTEQEILDVSAYVLEQADKGWK	EQNTDVATLFTNNCAGCHINGGNIVRRGKNLKTKALRKYGMDSVEAISQLVANGKNAMPAYQGRLTEQEILDVSAYVLEQADKGWK
Cytochrome c6BC	Anabaena sp. WA102	AA650_07275	ATGAAAAAACTAATAGTATTGATATTATGCACATTTTGCTTGTGGACTATCAATTTCACCTCACCCGCTAACGCTTTAGATACAGCCAAAGGGGCAGAAATTTTTAGTTTTCATTGTGCTGGTTGTCATATTAATGGGGAAAATATCATTAGACGCGGTAAAAACTTAAAAAAGAATGCACTTAAAAAATATGGCATGGATTCTTTAGAAGCGATTACAGCCATTGTCACTAATGGTAAGAATAATATGTCAGCTTATAAAAAAAGATTGACAACTGAGGAAATTCAGCAAGTTGCAGCTTATGTTTTGGAACAAGCAGAAAAAGACTGGAAATAA	MKKLIVLILCTFCLWTINFTSPANALDTAKGAEIFSFHCAGCHINGENIIRRGKNLKKNALKKYGMDSLEAITAIVTNGKNNMSAYKKRLTTEEIQQVAAYVLEQAEKDWK	LDTAKGAEIFSFHCAGCHINGENIIRRGKNLKKNALKKYGMDSLEAITAIVTNGKNNMSAYKKRLTTEEIQQVAAYVLEQAEKDWK
Cytochrome c6BC	Aphanothece cf. minutissima CCALA 015	C7B81_10490	GTGGAGGTCCCTGAGGCGGAGGTCCCTCTGGCGGAGATCATCGACGGCGGCGTGCTCCAGGTGAGCGTTCTCGATGTGGGCAGCTCCCTGTTCGGGGCCCACTGCGCGGGCTGTCACCTCCAGGGGGGCAACATCATCCGCCGTGGCAAGACCCTCAAGCTGGCGGCCCTGGAGCGCAACGGCGTCGCCTCCCCGGACGCCATCGCCGCGATCGCCGCCGGTGGTATCGGCCAGATGGGTGGCTATGCCCAGTCCCTGGGCGAAGGCGGGCCGGAGGCGGTGGCGGCCTGGGTGTGGCAGCAGGCCCTCGACGGCTGGCCCCGGGCCTGA	MEVPEAEVPLAEIIDGGVLQVSVLDVGSSLFGAHCAGCHLQGGNIIRRGKTLKLAALERNGVASPDAIAAIAAGGIGQMGGYAQSLGEGGPEAVAAWVWQQALDGWPRA	SVLDVGSSLFGAHCAGCHLQGGNIIRRGKTLKLAALERNGVASPDAIAAIAAGGIGQMGGYAQSLGEGGPEAVAAWVWQQALDGWPRA
Cytochrome c6BC	Aphanothece hegewaldii CCALA 016	C7H19_06435	ATGTTTAGATTAATTAAAATTATTTTTATCATTACGCTTGTTGTCTTAGTGAACCTGAATAACTTAGCATTTGCCGATGAACTCAATTCAGCAAAACTATTTGAAATTAATTGCGCGGGATGTCATCCAAAAGGAGGAAATATCATCCGTAGAGGCAAAACACTTAAATTAAAAGACTTAAAAAAATTTAAAATGGATTCACTCTTATCAGTAACAGATATTGTGACAAATGGAAAAGGTATTATGTCAGCATATAAAGAACGTTTAACAGAACAAGAAATTAATGCAGTTGCTAGTTATGTACTTGAACAAGCTAGAGAAAATTGGCAGTAA	MFRLIKIIFIITLVVLVNLNNLAFADELNSAKLFEINCAGCHPKGGNIIRRGKTLKLKDLKKFKMDSLLSVTDIVTNGKGIMSAYKERLTEQEINAVASYVLEQARENWQ	ADELNSAKLFEINCAGCHPKGGNIIRRGKTLKLKDLKKFKMDSLLSVTDIVTNGKGIMSAYKERLTEQEINAVASYVLEQARENWQ
Cytochrome c6BC	Arthrospira platensis C1	SPLC1_S520290	ATGATCATGAGAAATCTGTTAACTATTTTACTGCTGAGTGTTAGTTTATTGTGGGGTTGTTGGACACCAAAGGCGATCGCAGATAATCTGAATATTGAGAAGGGGGGGGAAATTTTTAGCGTCCACTGTGTGGGCTGTCATGCTGGTGGTGGTAACATTATTAGGCGGGGTAAAAATCTGAAACAGCGGGCTCTCCAACGGAATGGCTACGACTCAATAGAGGCGATCGCAGAAATTGTGGCTAATGGTAAAAGCAATATGTCGGCTTATTCTGACCGTCTGAGTGTCTCGGAAATTCAACAGGTCGCCGCCTATGTCTTAGACCAAGCCGAGAAAAATTGGCGTTAA	MIMRNLLTILLLSVSLLWGCWTPKAIADNLNIEKGGEIFSVHCVGCHAGGGNIIRRGKNLKQRALQRNGYDSIEAIAEIVANGKSNMSAYSDRLSVSEIQQVAAYVLDQAEKNWR	LNIEKGGEIFSVHCVGCHAGGGNIIRRGKNLKQRALQRNGYDSIEAIAEIVANGKSNMSAYSDRLSVSEIQQVAAYVLDQAEKNWR
Cytochrome c6BC	Arthrospira platensis NIES	NIES39_C03460	ATGATCATGAGAAATCTATTAAGTATTTTACTGGTGAGTGTTAGCCTATTGTGGGGGTGTTTAACACCTATGGCGATCGCAGATAATCTGAATTTTGATCAGGGGGCTGAGATTTTTAGCGTCCACTGTGTGGGCTGTCATGCTGGGGGTGGTAACATTATTAGGCGGGGTAAAAATTTGAAACAGCGGGCTCTCCAACGCAATGGCTACGACTCCATAGAGGCGATCGCAGAAATTGTGTCTAATGGTAAAAGCAATATGTCGGCTTATTCTGACCGTCTGAGTGTCTCAGAAATCAAACAGGTCGCCGCCTATGTGTTAGACCAGGCTGAGAAAAACTGGCGTTAA	MIMRNLLSILLVSVSLLWGCLTPMAIADNLNFDQGAEIFSVHCVGCHAGGGNIIRRGKNLKQRALQRNGYDSIEAIAEIVSNGKSNMSAYSDRLSVSEIKQVAAYVLDQAEKNWR	LNFDQGAEIFSVHCVGCHAGGGNIIRRGKNLKQRALQRNGYDSIEAIAEIVSNGKSNMSAYSDRLSVSEIKQVAAYVLDQAEKNWR
Cytochrome c6BC	Arthrospira platensis str. Paraca	APPUASWS_008420	ATGATCATGAGAAATCTATTAAGTATTTTACTGGTGAGTGTTAGCCTATTGTGGGGGTGTTTAACACCTATGGCGATCGCAGATAATCTGAATTTTGATCAGGGGGCTGAGATTTTTAGCGTCCACTGTGTGGGCTGTCATGCTGGGGGTGGTAACATTATTAGGCGGGGTAAAAATCTGAAACAGCGGGCTCTCCAACGCAATGGCTACGACTCAATAGAGGCGATCGCAGAAATTGTGTCTAATGGTAAAAGCAATATGTCGGCTTATTCTGACCGTCTGAGTGTCTCAGAAATCAAACAGGTCGCCGCCTATGTGTTAGACCAGGCTGAGAAAAACTGGCGTTAA	MIMRNLLSILLVSVSLLWGCLTPMAIADNLNFDQGAEIFSVHCVGCHAGGGNIIRRGKNLKQRALQRNGYDSIEAIAEIVSNGKSNMSAYSDRLSVSEIKQVAAYVLDQAEKNWR	LNFDQGAEIFSVHCVGCHAGGGNIIRRGKNLKQRALQRNGYDSIEAIAEIVSNGKSNMSAYSDRLSVSEIKQVAAYVLDQAEKNWR
Cytochrome c6BC	Arthrospira platensis YZ	AP285_06090	ATGAGAAATCTATTAAGTATTTTACTGGTGAGTGTTAGCCTATTGTGGGGGTGTTTAACACCTATGGCGATCGCAGATAATCTGAATTTTGATCAGGGGGCTGAGATTTTTAGCGTCCACTGTGTGGGCTGTCATGCTGGGGGTGGTAACATCATTAGGCGGGGTAAAAATTTGAAACAGCGGGCTCTCCAACGCAATGGCTACGACTCCATAGAGGCGATCGCAGAAATTGTGTCTAATGGTAAAAGCAATATGTCGGCTTATTCTGACCGTCTGAGTGTCTCAGAAATCAAACAGGTCGCCGCCTATGTGTTAGACCAGGCTGAGAAAAACTGGCGTTAA	MRNLLSILLVSVSLLWGCLTPMAIADNLNFDQGAEIFSVHCVGCHAGGGNIIRRGKNLKQRALQRNGYDSIEAIAEIVSNGKSNMSAYSDRLSVSEIKQVAAYVLDQAEKNWR	LNFDQGAEIFSVHCVGCHAGGGNIIRRGKNLKQRALQRNGYDSIEAIAEIVSNGKSNMSAYSDRLSVSEIKQVAAYVLDQAEKNWR
Cytochrome c6BC	Arthrospira sp. O9.13F	B9S53_24585	ATGATCATGAGAAATCTGTTAACTATTTTACTGCTGAGTGTTAGTTTATTGTGGGGTTGTTGGACACCAAAGGCGATCGCAGATAATCTGAATATTGAGAAGGGGGGGGAAATTTTTAGCGTCCACTGTGTGGGCTGTCATGCTGGTGGTGGTAACATTATTAGGCGGGGTAAAAATCTGAAACAGCGGGCTCTCSAACGGAATGGCTACGACTCAATAGAGGCGATCGCAGAAATTGTGGCTAATGGTAAAAGCAATATGTCGGCTTATTCTGACCGTCTGAGTGTCTCAGAAATTAAACAGGTCGCCGCCTATGTCTTAGACCAAGCCGAGAAAAATTGGCGTTAA	MIMRNLLTILLLSVSLLWGCWTPKAIADNLNIEKGGEIFSVHCVGCHAGGGNIIRRGKNLKQRALZRNGYDSIEAIAEIVANGKSNMSAYSDRLSVSEIKQVAAYVLDQAEKNWR	LNIEKGGEIFSVHCVGCHAGGGNIIRRGKNLKQRALZRNGYDSIEAIAEIVANGKSNMSAYSDRLSVSEIKQVAAYVLDQAEKNWR
Cytochrome c6BC	Brasilonema octagenarum UFV-E1	DP113_23530	ATGAGTATCAAATTGAAAAAGCTAATCATCATTCTCTTACTGACATTCATTGTCTTAAATCTGAACTTCATTCCTACAGCATTAGCTACAGATACAGTGAACGCCGAAAAAATATTTAGTGTTCAATGTGCTGGTTGTCATATTAACGGTAGCAACATTGTTAGACGAGGCAAGAATTTAAAATTAAAAGCACTAAAAAAATATCATATGGATTCCATTGAGGCAATTTCCTCCATTGTTACTAATGGTAAAAATAATATGCCAGCCTACGAAGATCGCCTTAGCAAACAAGAAATACAAGATTTATCCGCTTATGTGTTAAAGCAAGCTGAAAAAGGCTGGCGTTAG	MSIKLKKLIIILLLTFIVLNLNFIPTALATDTVNAEKIFSVQCAGCHINGSNIVRRGKNLKLKALKKYHMDSIEAISSIVTNGKNNMPAYEDRLSKQEIQDLSAYVLKQAEKGWR	TDTVNAEKIFSVQCAGCHINGSNIVRRGKNLKLKALKKYHMDSIEAISSIVTNGKNNMPAYEDRLSKQEIQDLSAYVLKQAEKGWR
Cytochrome c6BC	Brasilonema sennae CENA114	DP114_23625	ATGAGTATCAAATTGAAAAAGCTAATCATCATTCTCTTACTGACATTCATTGTCTTAAATCTGAACTTCATTCCTACAGCATTAGCTACAGATACAGTGAACGCCGAAAAAATATTTAGTGTTCAATGTGCTGGTTGTCATATTAACGGTAGCAACATTGTTAGACGAGGCAAGAATTTAAAATTAAAAGCACTAAAAAAATATCATATGGATTCCATTGAGGCAATTTCCTCCATTGTTACTAATGGTAAAAATAATATGCCAGCCTACGAAGATCGCCTTAGCAAACAAGAAATACAAGATTTATCCGCTTATGTGTTAAAGCAAGCTGAAAAAGGCTGGCGTTAG	MSIKLKKLIIILLLTFIVLNLNFIPTALATDTVNAEKIFSVQCAGCHINGSNIVRRGKNLKLKALKKYHMDSIEAISSIVTNGKNNMPAYEDRLSKQEIQDLSAYVLKQAEKGWR	TDTVNAEKIFSVQCAGCHINGSNIVRRGKNLKLKALKKYHMDSIEAISSIVTNGKNNMPAYEDRLSKQEIQDLSAYVLKQAEKGWR
Cytochrome c6BC	Brasilonema sp. UFV-L1	DP117_06545	ATGAGTTTCAAACTGAAAAAGCTAATCACAATTCTCTTACCGACATTCATTGTCTTAAATCTGAGCTTCATTCCTACAGCATTAGCTACAGATACAGCTAACGGCGAAAAAATATTTAGTGTTCAATGTGCTGGTTGTCATATTAACGGTAGCAACATTGTTAGGCGAGGCAAGAATTTAAAACTAAAAGCACTTAAAAAATATCATATGGATTCGATTGAAGCAATTTCCTCGATTGTGGCTAACGGTAAAAATAATATGTCAGCATACAAAGACCGTTTGACCATAGAAGAAATACAAGATGTTGCCGCTTATGTTTTAGAACAAGCCCAAAAAGGCTGGCGTTAG	MSFKLKKLITILLPTFIVLNLSFIPTALATDTANGEKIFSVQCAGCHINGSNIVRRGKNLKLKALKKYHMDSIEAISSIVANGKNNMSAYKDRLTIEEIQDVAAYVLEQAQKGWR	TDTANGEKIFSVQCAGCHINGSNIVRRGKNLKLKALKKYHMDSIEAISSIVANGKNNMSAYKDRLTIEEIQDVAAYVLEQAQKGWR
Cytochrome c6BC	Calothrix desertica PCC 7102	CAL7102_01117	TTGAAGAAGTTAGTAGTTCTAGTATTATTATTGATAGTTATTACTATTCAACCCGCATATGCTGAAGATATAGGCGCCGGAAGTAAAATATTTGAAGCCAATTGTGCAGGATGCCATATTAATGGTGGTAATATTGTGCGACGTGGTAAAAATCTGTTTAAGAAGGCTCTGAAACGAAATGGAATCGATTCGATGGAAGCTATTACTGAGCTGGTAACCAATGGTAAGAATAATATGCCTGCTTATAAAGACAAATTGACGGCGCCAGAAATTCAGGATGTTGCGACATATGTACTACAGCAGGCTGAGAATAACTGGCGCCATTAA	MKKLVVLVLLLIVITIQPAYAEDIGAGSKIFEANCAGCHINGGNIVRRGKNLFKKALKRNGIDSMEAITELVTNGKNNMPAYKDKLTAPEIQDVATYVLQQAENNWRH	EDIGAGSKIFEANCAGCHINGGNIVRRGKNLFKKALKRNGIDSMEAITELVTNGKNNMPAYKDKLTAPEIQDVATYVLQQAENNWRH
Cytochrome c6BC	Calothrix elsteri CCALA 953	CK510_18420	ATGAGAATAAAATCGAGAAAAATATTAACTTTACTTTTAACATTATTACTATGTTTGATAGTTATGAATAATCAACCAGCATCTGCTGCTAATTCAGCAAACAATCAAACTAATGCTGTCAAATTATTTGAAAATAATTGTGCAGGTTGTCATCTGAATGGGAATAATATTATCAGACGCGGTAAAAATTTAAAAATTAATGCTTTAAAGAAATATGGGATGAATTCAATAGAAGCGATCGCAGAAATAGTCACTAATGGGAAAAATAATATGTCGGCATACAAAGACAAATTAACCCCACGGGAAATTCAAGATGTAGCCACATACGTTTTACAGCAAGCTGAACATGACTGGCATTTTTGA	MRIKSRKILTLLLTLLLCLIVMNNQPASAANSANNQTNAVKLFENNCAGCHLNGNNIIRRGKNLKINALKKYGMNSIEAIAEIVTNGKNNMSAYKDKLTPREIQDVATYVLQQAEHDWHF	NNQTNAVKLFENNCAGCHLNGNNIIRRGKNLKINALKKYGMNSIEAIAEIVTNGKNNMSAYKDKLTPREIQDVATYVLQQAEHDWHF
Cytochrome c6BC	Calothrix sp. 336/3	IJ00_26000	GTGAAAAAGCTACTCATATTGATAATTATTTCCTTGACTATTTGGACAACTTACCCAGTAAAAGCCGTTTTTGCAATTGATACAGTTAAGGGGGGAGAGCAAATATTTGAGTTTCACTGTGCAGGATGTCATATCAACGGTAGCAATATCATCAGACGTGGTAAAAATCTCAAGTTACCTGCACTGAAAAAATATGGAATGGACTCCATCGCCGCAGTGACAGAAATAGTCACTAATGGTAAAAATAATATGTCAGCCTATAAAGACAAATTAACTGTTGCAGAGATTGAAGATGTCTCTAACTATGTTCTAGAACAAGCAGCAAAAGGATGGAAATAA	MKKLLILIIISLTIWTTYPVKAVFAIDTVKGGEQIFEFHCAGCHINGSNIIRRGKNLKLPALKKYGMDSIAAVTEIVTNGKNNMSAYKDKLTVAEIEDVSNYVLEQAAKGWK	DTVKGGEQIFEFHCAGCHINGSNIIRRGKNLKLPALKKYGMDSIAAVTEIVTNGKNNMSAYKDKLTVAEIEDVSNYVLEQAAKGWK
Cytochrome c6BC	Calothrix sp. HK-06	NIES2101_35980	TTGAAGAAGTTAGTAGTTATAGTATTATTATTGATAGTTATTACTATTCAACCAGTATATGCTGAAGATATAGGCGCGGGAAGTAAGATATTTGAAGCAAATTGTGCAGGATGCCATATTAATGGTGGTAACATTGTTCGACGTGGTAAAAATCTGTTTAAGAAGGCTTTGAAACGAAATGGAATGGATTCGATAGAGGCTATTACTGAGTTGGTCACTAATGGTAAGAATAATATGCCTGCTTATAAAGACAGATTGACGGTGCCGGAAATTCAGGATGTTGCAACTTATGTACTACAACAGGCTGAAAATAACTGGCGCCCTCAATAA	MKKLVVIVLLLIVITIQPVYAEDIGAGSKIFEANCAGCHINGGNIVRRGKNLFKKALKRNGMDSIEAITELVTNGKNNMPAYKDRLTVPEIQDVATYVLQQAENNWRPQ	EDIGAGSKIFEANCAGCHINGGNIVRRGKNLFKKALKRNGMDSIEAITELVTNGKNNMPAYKDRLTVPEIQDVATYVLQQAENNWRPQ
Cytochrome c6BC	Calothrix sp. NIES-4071	NIES4071_27980	ATGCCTATCAAATTCTTACAGGAAAAAAACTTGAGAAAACTACTAGTTATATTATGCACATTATTATATATAGTTATTATTATCCAACCAGCGTATGCTTTAGATAATAGCGGCGCCGCTAGTAAAATATTTGAAGCGAATTGTGCAGGTTGCCATATTAATGGTAGCAATATAGTGCGACGCGGTAAAAACTTGTTTAAGAAAGCTTTGAAAAAAAATGGAATGGATTCAATCGAAGCAATTACTGGTATAGTAACCAATGGTAAAAATAATATGCCAGCCTATAAAGACCGACTGGCGCCCGAACAAATCCAAGACGTAGCAACTTACGTACTACAACAAGCCGAAAACAACTGGCAGTGA	MPIKFLQEKNLRKLLVILCTLLYIVIIIQPAYALDNSGAASKIFEANCAGCHINGSNIVRRGKNLFKKALKKNGMDSIEAITGIVTNGKNNMPAYKDRLAPEQIQDVATYVLQQAENNWQ	DNSGAASKIFEANCAGCHINGSNIVRRGKNLFKKALKKNGMDSIEAITGIVTNGKNNMPAYKDRLAPEQIQDVATYVLQQAENNWQ
Cytochrome c6BC	Calothrix sp. PCC 6303	Cal6303_4070	TTGAAAAAACTCTCACAAGTATTGATTTTAATACTGTTTATGGTGTTATTTACGGTTGTTCAGCCTGTAACAGCCGATACCTTAAACTCAAATGGGGCAAAAATATTTGAGAGCAACTGTGCAGGGTGCCATATAAACGGTGGTAACATTATTCGGCGCGGTAAAAATCTAAAACTCAAGGTATTACGAAAAAATAATATGGATTCTGTGGATGCCATATCAGTAATCGTTGCTAATGGTAAAAATAATATGTCAGCATATCAAGACCGTCTCACAGTTGAAGAAATTCAAGCTGTGTCCACCTATGTCTTACAACAAGCTGAAAATAATTGGAAGTAG	MKKLSQVLILILFMVLFTVVQPVTADTLNSNGAKIFESNCAGCHINGGNIIRRGKNLKLKVLRKNNMDSVDAISVIVANGKNNMSAYQDRLTVEEIQAVSTYVLQQAENNWK	TLNSNGAKIFESNCAGCHINGGNIIRRGKNLKLKVLRKNNMDSVDAISVIVANGKNNMSAYQDRLTVEEIQAVSTYVLQQAENNWK
Cytochrome c6BC	Calothrix sp. PCC 7507	Cal7507_3860	GTGAAAAAACTACTAACCTTGGCATTACTTATTTTCTGTTTATTAACAAGTATTTTTACCCCATCTGCTATTGCCTTAGATACAGTTAACGGCTCACAAATCTTTAGCGTTCAGTGTGCTGGTTGTCATCTCAATGGCGGTAATATTGTCAGGCGAGGTAAAACTCTAAAACAGAAAGCACTCAAGAGATATGGGATGGATTCTCTTGAGGCGATTACAGACATTGTGACTAATGGTAAAAGTAATATGTCAGCCTATAAAGACCGCTTGAATGCACAGCAAATTCAAGATGTCGCTGCTTACGTTTTAGAACAAGCTGAAAAAGACTGGCGTTAA	MKKLLTLALLIFCLLTSIFTPSAIALDTVNGSQIFSVQCAGCHLNGGNIVRRGKTLKQKALKRYGMDSLEAITDIVTNGKSNMSAYKDRLNAQQIQDVAAYVLEQAEKDWR	LDTVNGSQIFSVQCAGCHLNGGNIVRRGKTLKQKALKRYGMDSLEAITDIVTNGKSNMSAYKDRLNAQQIQDVAAYVLEQAEKDWR
Cytochrome c6BC	Chlorogloea sp. CCALA 695	C7B70_07880	ATGAGAAAGTTGATATTTATTTTAGCAAGTGCGATCGCACTTATAATCCTTGTCACTCCTCCAGCTTTGGCGACATCAACAAGGGAGACAGCAACACTTTTTACTAATAACTGTGCGGGTTGCCATATCAACGGTGGTAATATTGTTAGGCGTAATAAGAGTTTAAAGTCAAAAGCATTAAAAAAATTTGGGATGGATTCCACTGATGCGATCGCTCAATTAATCAAAAATGGTCAATATGCTATGCCAGCTTACAAAGGTCGTCTCACACAACAGCAAATTGTTGATGTCTCAGCCTATGTATTAGAGCAAGCCGAGAAAGGCTGGAAGTAA	MRKLIFILASAIALIILVTPPALATSTRETATLFTNNCAGCHINGGNIVRRNKSLKSKALKKFGMDSTDAIAQLIKNGQYAMPAYKGRLTQQQIVDVSAYVLEQAEKGWK	TSTRETATLFTNNCAGCHINGGNIVRRNKSLKSKALKKFGMDSTDAIAQLIKNGQYAMPAYKGRLTQQQIVDVSAYVLEQAEKGWK
Cytochrome c6BC	Chlorogloeopsis fritschii PCC 6912	PCC6912_15310	ATGCAAAAACTATTAATATTAGTATTAACCATGTTCTTGCTGTTAACAAGTATTTTTACCCCAAGTGCTAGTGCAGCAGATACAACTAATGGCGCACAAATTTTTAGTATTCACTGTGCTGGTTGTCATATCAACGGTGGCAATATCATCAGGCGGGGTAAGACATTGAAAGCAAAAGCACTTAAGAAAAATGGTATGGATTCAATTGAGGCGATCGCATCCATTGTTACTAATGGTAAAAATAATATGTCAGCCTACAAAGACCGTCTCACTGCCCAAGAAATTCAAGATGTTTCTGCTTACGTTCTAGAACAAGCTCAAAAAGGCTGGCAGTAA	MQKLLILVLTMFLLLTSIFTPSASAADTTNGAQIFSIHCAGCHINGGNIIRRGKTLKAKALKKNGMDSIEAIASIVTNGKNNMSAYKDRLTAQEIQDVSAYVLEQAQKGW	ADTTNGAQIFSIHCAGCHINGGNIIRRGKTLKAKALKKNGMDSIEAIASIVTNGKNNMSAYKDRLTAQEIQDVSAYVLEQAQKGW
Cytochrome c6BC	Chondrocystis sp. NIES-4102	NIES4102_20320	GTGTTAAAACCCATCACTATCTTTATTGTCACATTGATACTTATTTTAGCTACTTTTACTAGTTCTCCAGTACTGGCAGATACAGATTCTAATTTAATTTCTGGATCGAAAATATTTGAAGCCAATTGTGCAGGCTGTCACGCTAACGGGGGTAACATTATTCGTAGAGGTAAAAATCTTAAAGCTAAAGCTTTAGCTAAAAACAAAGTGGACACAGTTGAAGCGATCGCACTTTTAGTAACTAATGGTAAAAATAATATGTCAGCCTATAAAGATAAATTAACTGCTGAAGAAATAACTGCCGTTAGTACCTATGTATTAGAACAAGCGCAACAAAATTGGAAGTGA	MLKPITIFIVTLILILATFTSSPVLADTDSNLISGSKIFEANCAGCHANGGNIIRRGKNLKAKALAKNKVDTVEAIALLVTNGKNNMSAYKDKLTAEEITAVSTYVLEQAQQNWK	SNLISGSKIFEANCAGCHANGGNIIRRGKNLKAKALAKNKVDTVEAIALLVTNGKNNMSAYKDKLTAEEITAVSTYVLEQAQQNWK
Cytochrome c6BC	Chroococcidiopsis cubana CCALA 043	C7B79_26990	ATGTTATTAAAGCAAATACTTAGTTTAGTACTGGTGATGCTCGTAGGAATGGCGATCGCCTTTTCTACCCCAGCCTTAGCCGCAGAGACACCAATTGGAGCCAAAATCTTTGAAACTCAATGTGCTGGATGTCACATTAATGGTGGCAACATCGTCAGGCGCGGCAAGAACCTGAAACAAAAAGCCTTGAAAAAATATGGCATGGATTCAATAGAGGCGATCGCTAATATTGTCACCAACGGTCAAGGAAATATGTCAGCTTATAAAGATCGCTTGACAGCAGAGGAAATTCAAGCAGTTTCCGCCTATGTCCTCCAGCAAGCAGAAGCAGGCTGGCGTAAACAGTGA	MLLKQILSLVLVMLVGMAIAFSTPALAAETPIGAKIFETQCAGCHINGGNIVRRGKNLKQKALKKYGMDSIEAIANIVTNGQGNMSAYKDRLTAEEIQAVSAYVLQQAEAGWRKQ	AETPIGAKIFETQCAGCHINGGNIVRRGKNLKQKALKKYGMDSIEAIANIVTNGQGNMSAYKDRLTAEEIQAVSAYVLQQAEAGWRKQ
Cytochrome c6BC	Chroococcidiopsis sp. CCALA 051	C7Y66_23525	ATGTTATTAAAGCAAATACTTAGTTTAGTGCTGGTGATGCTCGTAGAAATGGCGATCGCCTTTTCTACCCCAGCCTTAGCCGCAGAGACACCAAATGGAGCCAAAATCTTTGAAACTCAATGTGCTGGATGTCACATTAATGGTGGTAATATCGTCAGGCGCGGCAAGAACCTGAAACAAAAAGCCTTGAAAAAATATGGCATGGATTCAGTAGAGGCGATCGCTAATATTGTCACCAACGGTCAAGGAAATATGTCAGCTTACAAAGATCGCTTGACAGCAGAGGAAATTCAAGCAGTTTCCGCCTATGTCCTCCAGCAAGCAGAAGCAGGCTGGCGTAAACAGTGA	MLLKQILSLVLVMLVEMAIAFSTPALAAETPNGAKIFETQCAGCHINGGNIVRRGKNLKQKALKKYGMDSVEAIANIVTNGQGNMSAYKDRLTAEEIQAVSAYVLQQAEAGWRKQ	AETPNGAKIFETQCAGCHINGGNIVRRGKNLKQKALKKYGMDSVEAIANIVTNGQGNMSAYKDRLTAEEIQAVSAYVLQQAEAGWRKQ
Cytochrome c6BC	Chroococcidiopsis sp. PCC 6712	Chr6712_001549	ATGTGGAAAAAGTTTTTTTGTTTCTGTTTTATTGCGATCGCTGTAATCTTAGTTAATCCTCACCATGTTTTAGCGGATAATGGCGAGGGGACAACACTTTTTACGGCGAATTGTGCTGGTTGTCATCCTCAAGGAGGAAATATCATTAGACGAGGTAAAACCCTCAAAGCTAAGGCATTAAAACGTAACCAAGTCGATTCTTTAGAGGCAGTCATATCTTTAGTTACTGAAGGGAAAGGAAATATGCCAGCTTATGGCGATCGCCTTACTGATGAAGAAATTGTTGCTGTATCTAATTATGTAGTGGAAAAAGCAGCAACTAATTGGCGTTAA	MWKKFFCFCFIAIAVILVNPHHVLADNGEGTTLFTANCAGCHPQGGNIIRRGKTLKAKALKRNQVDSLEAVISLVTEGKGNMPAYGDRLTDEEIVAVSNYVVEKAATNWR	ADNGEGTTLFTANCAGCHPQGGNIIRRGKTLKAKALKRNQVDSLEAVISLVTEGKGNMPAYGDRLTDEEIVAVSNYVVEKAATNWR
Cytochrome c6BC	Chroococcus sp. FPU101	CFPU101_04740	ATGCTCAGACGAATCAAAATAATTTTGATGATAATGCTGATTTTTTTACTAAACCTAAATAATGCCTCATTAGCCGATGTAATTAATACAACAAAATTATTTGAAATTAACTGCGCGGGATGTCATCCCAAAGGAGGAAATATTATCCGTAGAGGCAAAACCCTAAAACTAAAAGACCTAAAAAAATTTAAAATGAATACGCTTTCATCAGTAACCGATATTGTTACCAATGGAAAGGGCAATATGTCAGCTTATAAAGAGCGTTTAACTAAGCCAGAAATTGATGCCGTTTCGAGCTATGTTCTTGAACAAGCCGAAAAAAATTGGCAGTAA	MLRRIKIILMIMLIFLLNLNNASLADVINTTKLFEINCAGCHPKGGNIIRRGKTLKLKDLKKFKMNTLSSVTDIVTNGKGNMSAYKERLTKPEIDAVSSYVLEQAEKNWQ	ADVINTTKLFEINCAGCHPKGGNIIRRGKTLKLKDLKKFKMNTLSSVTDIVTNGKGNMSAYKERLTKPEIDAVSSYVLEQAEKNWQ
Cytochrome c6BC	Crocosphaera subtropica ATCC 51142	cce_1107	ATGCAATTAAAAATTTACTCGATTTTTTTTACAGTAATTTTACTATTGTTTCTGGTAATTTCTCCAACTTCAACATTAGCAGAAGAAGCGACAGACGGGGCTAAAATTTTTACTGTTCATTGCGCTGGATGTCATCCTAATGGTAACAATATTATTAGACGAGGGAAGAATTTAAAAATGAAGGCGTTGAAAAGAAATAAAGTTGATACTTTAGATGCTGTTATTAATATCGTAACTTATGGTAAAAATAATATGTCAGCTTACGAAGAAAGACTGACACAAGATGAAATTAAAATGGTATCTCAATATGTATTAGAACAAGCTAATAATAATTGGCGTAACCCTTAA	MQLKIYSIFFTVILLLFLVISPTSTLAEEATDGAKIFTVHCAGCHPNGNNIIRRGKNLKMKALKRNKVDTLDAVINIVTYGKNNMSAYEERLTQDEIKMVSQYVLEQANNNWRNP	EEATDGAKIFTVHCAGCHPNGNNIIRRGKNLKMKALKRNKVDTLDAVINIVTYGKNNMSAYEERLTQDEIKMVSQYVLEQANNNWRNP
Cytochrome c6BC	Cuspidothrix issatschenkoi CHARLIE-1	CUN59_03180	ATGAAAAAACTAATTATTTTCATAATATGTACATTTTCCTTATGGACAATTAATTTCAACTTACCCGCTAAGGCTTTAGATACAGCCAAAGGTGCAGAAATTTTCAGTTTCCATTGTGCTGGTTGTCATATCAATGGCGGTAATATAATTAGACGAGGTAAAAACTTAAAAAAGAATGCCTTAAAAAAATATAGAATGGATTCTTTAGAAGCAATTACAAATATCGTCACTAACGGTAAAAGTAATATGTCAGCTTATAAAGATCGTTTAACAACAGAGGAAATTCAAACCGTTGCCGCTTATGTTTTGGAACAAGCAGAAAAAGATTGGAAATAA	MKKLIIFIICTFSLWTINFNLPAKALDTAKGAEIFSFHCAGCHINGGNIIRRGKNLKKNALKKYRMDSLEAITNIVTNGKSNMSAYKDRLTTEEIQTVAAYVLEQAEKDWK	LDTAKGAEIFSFHCAGCHINGGNIIRRGKNLKKNALKKYRMDSLEAITNIVTNGKSNMSAYKDRLTTEEIQTVAAYVLEQAEKDWK
Cytochrome c6BC	Cyanobacterium aponinum IPPAS B-1201	CSQ80_13210	ATGACAAAATATTTAACTATTATTATTTCTTTAATTTTGACAATTAATCTTTTATTTATTTTCCCTGTTAATGCAGAAACAGTTATCAATAACCAGCCCCAAAAAATATTCGAGTTAAATTGTGCAGGATGTCATCCCAATGGCAATAATATTATTAGACGGGGAAAAAATTTAAAATTAAAAGCCCTTCATCGTAACGGTTATGATTCAGTAGAAGCTATTACTCAAATAGTAAGTAATGGTAAAAATAATATGTCTGCTTTTTCTAATCGTCTGAGTGAAAGGGAAATTAAGGAAGTTGCCGAGTATGTTTTACAACAAGCTGAGAATAATTGGAAAGGTTAA	MTKYLTIIISLILTINLLFIFPVNAETVINNQPQKIFELNCAGCHPNGNNIIRRGKNLKLKALHRNGYDSVEAITQIVSNGKNNMSAFSNRLSEREIKEVAEYVLQQAENNWKG	VINNQPQKIFELNCAGCHPNGNNIIRRGKNLKLKALHRNGYDSVEAITQIVSNGKNNMSAFSNRLSEREIKEVAEYVLQQAENNWKG
Cytochrome c6BC	Cyanobacterium sp. IPPAS B-1200	A5482_02970	ATGCGAAAATTATCTATTTTTATAGTTACACTAATTACTATTATTTCTTTTAATTTATTTTATATTCCAAGGGCGATCGCCCAAATAAACTTAACAGAAATTAATCAAAATATTAATGAACCTAGTAAACTTTTTGAGATTAATTGTGCAGGGTGTCATCTTAATGGAGGTAACATCATTCGTAGAGGCAAAAACTTAAAATTAAAAGCCCTTCAAAAAAATGGTTATGATACCACTGAATCCATAGCAACTATAATTACTAATGGCAAAAATAATATGTCGGCTTATGGCGATCGCCTTTCTAATCAACAAATAAATGACCTTTCCAACTATGTTCTAAATCAAGCGAAAAATAACTGGAAATAA	MRKLSIFIVTLITIISFNLFYIPRAIAQINLTEINQNINEPSKLFEINCAGCHLNGGNIIRRGKNLKLKALQKNGYDTTESIATIITNGKNNMSAYGDRLSNQQINDLSNYVLNQAKNNWK	QNINEPSKLFEINCAGCHLNGGNIIRRGKNLKLKALQKNGYDTTESIATIITNGKNNMSAYGDRLSNQQINDLSNYVLNQAKNNWK
Cytochrome c6BC	Cyanobium sp. NIES-981	CBM981_0133	ATGCTGCGCGTGATGCATCCCTGGTTCAGGCGCTCGGCGGTCGCGCTGGTGATGATTGGCCTCGTTCTGTTCACCGCGCTGCAGCCCGCTGCAGCGGCGGGCCCATCAGCGGATGGAGCCAGGCTTTTCGAGAATCACTGTGCCGGCTGTCATGTCAACGGCGGCAACATCATCCGTCGCCGCAAGACCCTGCGCCTGGCCGCCCTTGAGCGCCAGGGGGTGGCATCCGAGCAGGCGATCGCTGCCATTGCCGCAGCCGGGATCGGCCAGATGGGCGGGTACGGTGACGTGCTCGGAGAGGAGGGCGTCCGGGCCGTGGCCCGCTGGGTGTGGGATCAGGCCCAGGCGGACTGGCCGCGCACCTGA	MLRVMHPWFRRSAVALVMIGLVLFTALQPAAAAGPSADGARLFENHCAGCHVNGGNIIRRRKTLRLAALERQGVASEQAIAAIAAAGIGQMGGYGDVLGEEGVRAVARWVWDQAQADWPRT	GPSADGARLFENHCAGCHVNGGNIIRRRKTLRLAALERQGVASEQAIAAIAAAGIGQMGGYGDVLGEEGVRAVARWVWDQAQADWPRT
Cytochrome c6BC	Cyanobium sp. PCC 7001	CPCC7001_1051	GTGGTTCTGGAGCTTCGGCCCGTGATGCAGTCCTGGTTCAGACGCGCCGCCGTGGCGCTGCTCATCATCGGTCTGGTTGTGTCGCTTCCGGTGCAGGCCGCTTCAGCAGCGCTGCCTGCGGCCGATGGAGCCAGGCTGTTTGAGAATCATTGCGCCGGTTGTCACCTCAACGGCGGCAACATCATCCGCCGCCGCAAGACTCTCCGGCTGGCTGCCCTGGAGCGCCAGGGGGTGGCTTCGGAGCAGGCGATCGCGGCCATCGCCGCGGCCGGTGTGGGCCAGATGGGTGGCTACGGCGATGTGCTCGGAGACGACGGCGTTGTGGCCGTGGCCCGCTGGGTGTGGGAGCAGGCCCAGGCGGGCTGGCCGCGCAGCTGA	MVLELRPVMQSWFRRAAVALLIIGLVVSLPVQAASAALPAADGARLFENHCAGCHLNGGNIIRRRKTLRLAALERQGVASEQAIAAIAAAGVGQMGGYGDVLGDDGVVAVARWVWEQAQAGWPRS	LPAADGARLFENHCAGCHLNGGNIIRRRKTLRLAALERQGVASEQAIAAIAAAGVGQMGGYGDVLGDDGVVAVARWVWEQAQAGWPRS
Cytochrome c6BC	Cyanobium usitatum str. Tous	C7K55_07815	ATGCTGCAGAAGTTGTTGCGGGGGTTGGGGTTGGCCAGGTTGAGATGGTTTGCCGTTGTGATGGCGGCGCTGGTAATAAGTGCTGGCCCGGTTTGGGCTGCCCCTGCGGCGGATGGGGCTGAGCTGTTTGCCAACCATTGCGCTGGCTGCCACGTAAATGGGGGCAACATCATTCGCCGCGGCAAAAACTTGCACCTGGCTGCCCTGGAGCGAAATGGCATCGATGGTCCGGAGCGGATCGCCGTAATTGCCGCCGCCGGCCAGGGCCAGATGTCTGGTTATGCAGCCGTGCTTGGGGAAGGGGGAGCAGAGGCGGTGGCGGGCTACGTGTGGCAGCAGGCCCAGCTGGATTGGCCCAAGGTCTGA	MLQKLLRGLGLARLRWFAVVMAALVISAGPVWAAPAADGAELFANHCAGCHVNGGNIIRRGKNLHLAALERNGIDGPERIAVIAAAGQGQMSGYAAVLGEGGAEAVAGYVWQQAQLDWPKV	APAADGAELFANHCAGCHVNGGNIIRRGKNLHLAALERNGIDGPERIAVIAAAGQGQMSGYAAVLGEGGAEAVAGYVWQQAQLDWPKV
Cytochrome c6BC	Cyanosarcina cf. burmensis CCALA 770	C7B80_02175	ATGAAAATGTTATTAAAGCAAATACTTAGTTTAGTACTGGTGATGCTCGTAGAAATGGCGATCGCCTTTTCTACCCCAGCCTTAGCCGCAGAGACACCAATTGGAGCCAAAATCTTTGAAACTCAATGTGCTGGATGTCACATTAATGGTGGCAACATCGTCAGGCGCGGCAAGAACCTGAAACAAAAAGCCTTGAAAAAATATGGCATGGATTCAATAGAGGCGATCGCCAAAATTGTCACCAACGGTCAAGGAAATATGTCAGCTTACAAAGATCGCTTGACAGCAGAGGAAATTCAAGCAGTATCTGTTTATGTTTTAAAACAAGCTGAAATCGGTTGGCATTGA	MKMLLKQILSLVLVMLVEMAIAFSTPALAAETPIGAKIFETQCAGCHINGGNIVRRGKNLKQKALKKYGMDSIEAIAKIVTNGQGNMSAYKDRLTAEEIQAVSVYVLKQAEIGWH	AETPIGAKIFETQCAGCHINGGNIVRRGKNLKQKALKKYGMDSIEAIAKIVTNGQGNMSAYKDRLTAEEIQAVSVYVLKQAEIGWH
Cytochrome c6BC	Cylindrospermum sp. NIES-4074	NIES4074_46640	GTGAAAAAATTACTAACATTAATATTAGTGACACTTTTATGGTGGACTAATGCTTTTACTTTATCTGCTAGTGCAGCAGATACAATAAATGGCGCACAAATTTTTAGTGTTCATTGTGCTGGTTGTCATGACAACGGCGGTAACATCATCAGGTGGGGTAAGAACCTGAAAAAAAATGCCCTCAAGAGATATGGTATGGATTCAATAGAGGCTATTACATCTATTGTAGCCAATGGTAAAAGTAATATGTCAGCTTATAAAGACCGTTTGAGCGGACAGCAAATTCAAGATGTTGCTGCTTATGTTCTTGAACAAGCAGAAAAAGATTGGCGTTAA	MKKLLTLILVTLLWWTNAFTLSASAADTINGAQIFSVHCAGCHDNGGNIIRWGKNLKKNALKRYGMDSIEAITSIVANGKSNMSAYKDRLSGQQIQDVAAYVLEQAEKDWR	ADTINGAQIFSVHCAGCHDNGGNIIRWGKNLKKNALKRYGMDSIEAITSIVANGKSNMSAYKDRLSGQQIQDVAAYVLEQAEKDWR
Cytochrome c6BC	Dolichospermum compactum NIES-806	NIES806_20220	ATGAAAAAAGTAATAATATTGATATTATGCACATTTTTTCTGTGGAGTATCAATTTCACCTTACCCGCTAACGCTTTAGAGACAAAGAATGGGGCGGAAATTTTTAGTTTCCATTGTGCCGGTTGTCATATTAATGGAGAAAACATTATTAGACGTGGTAAAAACCTCAAAAAGAATGCACTTAAAAGATATAAAATGGATTCTTTAGAAGCAATTACAGCCATTGTCACTAATGGGAAAAATAATATGTCAGCTTATAAAGATCGTTTAACACCAGAGGAAATTAAAAAAGTCGCGACTTATGTTTTGGAACAAGCAGAAAAAGATTGGAAATA	MKKVIILILCTFFLWSINFTLPANALETKNGAEIFSFHCAGCHINGENIIRRGKNLKKNALKRYKMDSLEAITAIVTNGKNNMSAYKDRLTPEEIKKVATYVLEQAEKDWK	LETKNGAEIFSFHCAGCHINGENIIRRGKNLKKNALKRYKMDSLEAITAIVTNGKNNMSAYKDRLTPEEIKKVATYVLEQAEKDWK
Cytochrome c6BC	Dolichospermum sp. UHCC 0315A	BMF77_01458	ATGAAAAAGGTAATAATATTGATATTATGCACATTTTGCCTGTGGACTATCAATTTTACCTTACCTGCTAATGCTTTAGATACAGGAAATGGTGCGGGTGCGGAAATTTTTAGTTTCCACTGTGCTGGTTGTCATATTCATGGAGAAAACATTATTAGACGGGGTAAAAACCTCAAAAAGAATGCCCTTAAAAAATATGGGATGGATTCTTTAGCAGCGATTACAACCATTGTTACTAATGGTAAAAATAATATGTCAGCTTATAAAGAAAGATTGACGACTGAGGAAATTCAACAAGTTGCAGCTTATGTTTTGGAACAAGCAGAAAAAGACTGGAAATAA	MKKVIILILCTFCLWTINFTLPANALDTGNGAGAEIFSFHCAGCHIHGENIIRRGKNLKKNALKKYGMDSLAAITTIVTNGKNNMSAYKERLTTEEIQQVAAYVLEQAEKDWK	TGNGAGAEIFSFHCAGCHIHGENIIRRGKNLKKNALKKYGMDSLAAITTIVTNGKNNMSAYKERLTTEEIQQVAAYVLEQAEKDWK
Cytochrome c6BC	Fischerella major NIES-592	NIES592_16795	ATGTGTGAGAAAACAGCTCTAAAATTGACACTGTTGATATTTACACTATTGATAATTAGCTTTTATCAACCAGCCTTAGCCGCAGATACAACTAATGGCGCAAAAATCTTTGATGTTCATTGCGCTGGTTGCCATCTCAATGGTAGTAATATTGTCCGGCGAGGTAAAAACCTAAAGCTCAAAGCACTAAAAAAATATAGTATGGATTCAACAGAAGCGATCGCTTCTATAGTTGCCAATGGCAAAAATAATATGTCAGCCTACAAAGACCGTTTAAGTGAGCAAGAAATACAAGATGTAGCCGCCTATGTTTTACAGCAGGCTGAAAAAGGCTGGCGTTAA	MCEKTALKLTLLIFTLLIISFYQPALAADTTNGAKIFDVHCAGCHLNGSNIVRRGKNLKLKALKKYSMDSTEAIASIVANGKNNMSAYKDRLSEQEIQDVAAYVLQQAEKGWR	ADTTNGAKIFDVHCAGCHLNGSNIVRRGKNLKLKALKKYSMDSTEAIASIVANGKNNMSAYKDRLSEQEIQDVAAYVLQQAEKGWR
Cytochrome c6BC	Fischerella muscicola CCMEE 5323	CEN44_07740	ATGTGTGGGAAAATAGCTATAAAATTGGCACTGTTGATATTTACACTATTGATAATTAGCTTTAATCAACCAGCGTTAGCCGCAGATACAACCAATGGTGCAAAAATCTTTGATGTTCATTGTGCTGGTTGTCATCTCAACGGTAGTAATATCGTCAGGCGAGGTAAAAACTTAAAGCTTAAAGCACTAAAAAAATATAGGATGGATTCAACAGAAGCGATCGCTTCTATAGTTGCCAATGGGAAAAATAATATGTCAGCCTACAAAGATCGTCTGAGTGAGCAAGAAATACAAGATGTGGCCGCCTATGTTTTACAACAGGCTGAAAAAGGCTGGCGTTAA	MCGKIAIKLALLIFTLLIISFNQPALAADTTNGAKIFDVHCAGCHLNGSNIVRRGKNLKLKALKKYRMDSTEAIASIVANGKNNMSAYKDRLSEQEIQDVAAYVLQQAEKGWR	ADTTNGAKIFDVHCAGCHLNGSNIVRRGKNLKLKALKKYRMDSTEAIASIVANGKNNMSAYKDRLSEQEIQDVAAYVLQQAEKGWR
Cytochrome c6BC	Fischerella sp. NIES-3754	FIS3754_11490	ATGTGTGAGAAAACAGCTCTAAAATTGACACTGTTGATATTTACACTATTGATAATTAGCTTTTATCAACCAGCCTTAGCCGCAGATACAACTAATGGCGCAAAAATCTTTGATGTTCATTGCGCTGGTTGCCATCTCAATGGTAGTAATATTGTCCGGCGAGGTAAAAACCTAAAGCTCAAAGCACTAAAAAAATATAGTATGGATTCAACAGAAGCGATCGCTTCTATAGTTGCCAATGGCAAAAATAATATGTCAGCCTACAAAGACCGTCTGAGTGAGCAAGAAATACAAGATGTAGCCGCCTATGTTTTACAACAGGCTGAAAAAGGCTGGCGTTAA	MCEKTALKLTLLIFTLLIISFYQPALAADTTNGAKIFDVHCAGCHLNGSNIVRRGKNLKLKALKKYSMDSTEAIASIVANGKNNMSAYKDRLSEQEIQDVAAYVLQQAEKGWR	ADTTNGAKIFDVHCAGCHLNGSNIVRRGKNLKLKALKKYSMDSTEAIASIVANGKNNMSAYKDRLSEQEIQDVAAYVLQQAEKGWR
Cytochrome c6BC	Fischerella sp. NIES-4106	NIES4106_29930	ATGTGTGGGAAAACTACTCTAAAATTTACACTATTGCTCTTCACACTGTTGATAATTAGCTTTAGCCAACCAGCATTAGCCGCAGATACAACCAATGGTGCAAAAATCTTTGATGTTCATTGTGCTGGTTGTCATATCAACGGTAGTAATATCGTCAGGCGAGGTAAAAACTTAAAGCTCAAAGCACTAAAAAAATATGGTATGGATTCAATAGAAGCTATTTCTTCCCTTGTTGCTAATGGTAAAAATAATATGTCAGCCTATAAAGATCTTCTTAGTGAACAAGAAATACAAGATGTCGCCGCCTATGTTTTACAACAAGCCGAAAAAAGCTGGCGTTAA	MCGKTTLKFTLLLFTLLIISFSQPALAADTTNGAKIFDVHCAGCHINGSNIVRRGKNLKLKALKKYGMDSIEAISSLVANGKNNMSAYKDLLSEQEIQDVAAYVLQQAEKSWR	ADTTNGAKIFDVHCAGCHINGSNIVRRGKNLKLKALKKYGMDSIEAISSLVANGKNNMSAYKDLLSEQEIQDVAAYVLQQAEKSWR
Cytochrome c6BC	Fischerella thermalis	FJSC11DRAFT_3535	ATGTGTGAGAAAACAGCTCTAAAATTGACACTGTTGATATTTACACTATTGATAATTAGCTTTAATCAACCAGCCTTAGCCGCAGATACAACTAATGGCGCAAAAATCTTTGATGTTCATTGCGCTGGTTGTCATCTCAATGGTAGTAATATTGTCCGGCGAGGTAAAAACTTAAAGCTCAAGGCACTAAAAAAATATAGTATGGATTCAACAGAAGCGATCGCTTTCATAGTTGCCAATGGCAAAAATAATATGTCAGCCTACAAAGACCGTTTAAGTGAGCAAGAAATACAAGATGTAGCCGCCTATGTTTTACAGCAGGCTGAAAAAGGCTGGCGTTAA	MCEKTALKLTLLIFTLLIISFNQPALAADTTNGAKIFDVHCAGCHLNGSNIVRRGKNLKLKALKKYSMDSTEAIAFIVANGKNNMSAYKDRLSEQEIQDVAAYVLQQAEKGWR	ADTTNGAKIFDVHCAGCHLNGSNIVRRGKNLKLKALKKYSMDSTEAIAFIVANGKNNMSAYKDRLSEQEIQDVAAYVLQQAEKGWR
Cytochrome c6BC	Fischerella thermalis 111/344/542	CA946_10200	ATGTGTGAGAAAACAGCTCTAAAATTGACACTGTTGATATTTACACTATTGATAATTAGCTTTAATCAACCAGCCTTAGCCGCAGATACAACTAATGGCGCAAAAATCTTTGATGTTCATTGCGCTGGTTGTCATCTCAATGGTAGTAATATTGTCCGGCGAGGTAAAAACTTAAAGCTCAAGGCACTAAAAAAATATAGTATGGATTCAACAGAAGCGATCGCTTTCATAGTTGCCAATGGCAAAAATAATATGTCAGCCTACAAAGACCGTTTAAGTGAGCAAGAAATACAAGATGTAGCCGCCTATGTTTTACAGCAGGCTGAAAAAGGCTGGCGTTAA	MCEKTALKLTLLIFTLLIISFNQPALAADTTNGAKIFDVHCAGCHLNGSNIVRRGKNLKLKALKKYSMDSTEAIAFIVANGKNNMSAYKDRLSEQEIQDVAAYVLQQAEKGWR	ADTTNGAKIFDVHCAGCHLNGSNIVRRGKNLKLKALKKYSMDSTEAIAFIVANGKNNMSAYKDRLSEQEIQDVAAYVLQQAEKGWR
Cytochrome c6BC	Geminocystis sp. NIES-3708	GM3708_2482	ATGAATTGTGCTGGATGTCATCCCAATGGTAGTAATATTATTAGAAGAGGTAAAAATTTGCGGTTAAAAACTTTGCAAAAGAATGGTTATGATTCTGTAGATGCGATCACAAATATAATTGCGAATGGTAAAAATAATATGTCAGCATTTAAAGATCGTCTCACAGAAAATGAAATTAATCAAGTAGCACAATATGTTTTTCAACAAGCAGAAAATAACTGGCAATAA	MNCAGCHPNGSNIIRRGKNLRLKTLQKNGYDSVDAITNIIANGKNNMSAFKDRLTENEINQVAQYVFQQAENNWQ	MNCAGCHPNGSNIIRRGKNLRLKTLQKNGYDSVDAITNIIANGKNNMSAFKDRLTENEINQVAQYVFQQAENNWQ
Cytochrome c6BC	Halomicronema excentricum str. Lakshadweep	DYY88_20320	ATGATGGTGCGATCGCTGCTCAAGTTCGGGCTCTGCCTGCTCGCTGTGCTCTGTAGTGGACTGCTCTGGCTCCCGCTGGGGGCGACGGCAGGAGACTTACAAGAGCCAGAGGCGTCGGCACCGGCTTTGTTTGAAACTCACTGTGCAGGCTGTCACGTCGGCGGGGGCAACATCGTGCGACGGCGCAAAACTTTGAAGCAGCGAGCCCTAGAACGCAATGGCGTAGATTCCGTCGCGGCGATCGCTAATCTGATCACTAATGGCAAAGGCATTATGTCGGCCTATCGCGATCGCCTCACCGCAGCAGAAATCGATCAACTCGCCCAGTACGTTTGGCAACAAGCCCAAGACGACTGGCAGTAA	MMVRSLLKFGLCLLAVLCSGLLWLPLGATAGDLQEPEASAPALFETHCAGCHVGGGNIVRRRKTLKQRALERNGVDSVAAIANLITNGKGIMSAYRDRLTAAEIDQLAQYVWQQAQDDWQ	EPEASAPALFETHCAGCHVGGGNIVRRRKTLKQRALERNGVDSVAAIANLITNGKGIMSAYRDRLTAAEIDQLAQYVWQQAQDDWQ
Cytochrome c6BC	Hapalosiphon sp. MRB220	AMR41_13555	ATGTGTGCTACAAATACTCTCAAATTTATACTGTTGATTTTCACACTGTTGATAATTAGCTTCGGTAAACCAGCATTAGCCGCAGATACAACCAATGGCGCAACAATATTCGATGTTCATTGCGCTGGCTGTCATATTAACGGTAGTAATATTGTCAGGCGAGGAAAAAATTTGAAGCTTAAAGCACTAAAAAAATATGGTATGGATTCAATAGAGGCTATTTCTTCTCTTGTTGCTAATGGTAAAAATAATATGTCAGCCTATAAAGACCGCCTTAGTCAACAAGAAATACAAGATGTCGCCGCCTATGTTTTACAACAAGCCGAAAAAGGCTGGCGTTGA	MCATNTLKFILLIFTLLIISFGKPALAADTTNGATIFDVHCAGCHINGSNIVRRGKNLKLKALKKYGMDSIEAISSLVANGKNNMSAYKDRLSQQEIQDVAAYVLQQAEKGWR	ADTTNGATIFDVHCAGCHINGSNIVRRGKNLKLKALKKYGMDSIEAISSLVANGKNNMSAYKDRLSQQEIQDVAAYVLQQAEKGWR
Cytochrome c6BC	Hydrococcus rivularis NIES-593	NIES593_05370	ATGTTAAGGAGATCGATTATCTTGAAGCAACTCCTAATATCCCTTTTAATTTTTCTCATAGTAATGACGAGTGGATTGAACGATCCAGCAATGGCATTAGATACCATAAATGGAGCTAAAATCTTTAATGTTAATTGTGCCGGCTGCCATCTAAATGGCGGCAATATTGTAAGGCGTAATAAAACCCTCAAAATCAAGGCATTGCAGCGCAATAAAATGGACTCTTTAGAAGCTATACAAGATATAGTGGCTAATGGTAAAAATAATATGTCTGCCTATCGCGATCGCTTGACAAAACAAGAAATAGAAGATGTAGCTGCTTATGTTCTGGAAAGAGCTAAAAATGATTGGAAAAGTTAA	MLRRSIILKQLLISLLIFLIVMTSGLNDPAMALDTINGAKIFNVNCAGCHLNGGNIVRRNKTLKIKALQRNKMDSLEAIQDIVANGKNNMSAYRDRLTKQEIEDVAAYVLERAKNDWKS	LDTINGAKIFNVNCAGCHLNGGNIVRRNKTLKIKALQRNKMDSLEAIQDIVANGKNNMSAYRDRLTKQEIEDVAAYVLERAKNDWKS
Cytochrome c6BC	Hydrocoleum sp. CS-953	AFK68_06705	ATGAAAAAAATAATTACAGTTTGCTTATTGATATTTATATCAATCAATATTATGAAAATGCCCACTGTATTAGGAGTGGAAACAACAAAAGGTGGAGAACTTTTTCAGATTCATTGTGCAGGTTGTCATGCTAATGGAGGCAATATTGTTAGAAGGTGGAAAAACTTAAAAATAAGGACTTTGAAAAAAAATAAATTAGATTCTGTCGAGGCGATCGCTTCTCTAGTTAAAAATGGTAAAAACAATATGTCGTCTTATCAAGACCGTTTAACTCCAGCAGAAATTGAAACTGTATCAGCTTATGTATTGCAGCAAGCAGAAAATGGTTGGCATTGA	MKKIITVCLLIFISINIMKMPTVLGVETTKGGELFQIHCAGCHANGGNIVRRWKNLKIRTLKKNKLDSVEAIASLVKNGKNNMSSYQDRLTPAEIETVSAYVLQQAENGWH	VETTKGGELFQIHCAGCHANGGNIVRRWKNLKIRTLKKNKLDSVEAIASLVKNGKNNMSSYQDRLTPAEIETVSAYVLQQAENGWH
Cytochrome c6BC	Hyella patelloides LEGE 07179	H1P_1120003	ATGTTGAAAAATATTTTTTGTGTTTTTTTAATTGCGATCGCTTTATTCTTAGTAAACACTAGCCCAGTATTAGCAGATATTCAAGGAGAACAAATCTTTACTGCTAATTGTGCTGGTTGTCACCCTAAAGGAGGCAATATTATTAGAAGGGGTAAAAATCTCAAGGCTAGGGCTTTAAAACGGAATCAGCTAGATTCTCAAGATGCAATAGTCTCTTTAGTTACTAATGGCAAAGGTATTATGTCAGCTTATGGCGATCGCTTAACTGCCGAAGAGATTGCAGCAGTCTCTAATTATGTCTTAGAACAAGCAGCAAATAATTGGCGTTAA	MLKNIFCVFLIAIALFLVNTSPVLADIQGEQIFTANCAGCHPKGGNIIRRGKNLKARALKRNQLDSQDAIVSLVTNGKGIMSAYGDRLTAEEIAAVSNYVLEQAANNWR	LADIQGEQIFTANCAGCHPKGGNIIRRGKNLKARALKRNQLDSQDAIVSLVTNGKGIMSAYGDRLTAEEIAAVSNYVLEQAANNWR
Cytochrome c6BC	Leptolyngbya boryana IAM M-101	LBWT_5000	ATGCTGAAATTCATTGCCATTCTCTTAAGTGCTGTTTTACTTTTTTCGTCGCCAGCTTGGGCAGATGAGTCACCTGCACAGTTATTTGAGCTTCAGTGTGCGGGCTGTCATGTGAATGGGGGCAACATTGTGCGACGCGGAAAAACACTGAAGCTGAAAGCACTAGAAAAGAATGGATACGCAACCGTCGAAGCGATCGTGGCAATTATTACCAACGGAAAAGGAAATATGTCTGCTTACAAAGATCGCTTGAACGAATCAGAGATTCAATCCGTTGCTGAATATGTTCTCGATCGCGCTCATCAAAACTGGAACTGA	MLKFIAILLSAVLLFSSPAWADESPAQLFELQCAGCHVNGGNIVRRGKTLKLKALEKNGYATVEAIVAIITNGKGNMSAYKDRLNESEIQSVAEYVLDRAHQNWN	WADESPAQLFELQCAGCHVNGGNIVRRGKTLKLKALEKNGYATVEAIVAIITNGKGNMSAYKDRLNESEIQSVAEYVLDRAHQNWN
Cytochrome c6BC	Leptolyngbya sp. Heron Island J	N836_35995	ATGCCGGTACCTACATCTAGCCCCGCGTTAGTTTCTCAACTGCTGCTCACCCTGCCAAAAACACTGCCACCGTTTTGGACTCAACTAAAGCGACTGCTCCTAGGCTATCTAATGTGTTCTTTAATAGTCAGCCTATGGATGAGCAGTATCCCTGTTGCTTGGGCAGATACCTCAGTTGAACTATTTGAGGTAAATTGTGCCGGCTGTCATCCGAATGGAGCCAATATTATCCGTCGCAGCAAAAATTTAAAGCAAAAGGCTCTCAAGCGTTATGGCTATGACTCTGTGGATGAGATCGCAACCCTCATCACTAATGGGAAAGGTCTTATGAGCGCTTACGGTGATCGACTTAGTGAAGATGAAGTTACTCGTCTGGCAAACTATGTCTTAGAGCAAGCG…	MPVPTSSPALVSQLLLTLPKTLPPFWTQLKRLLLGYLMCSLIVSLWMSSIPVAWADTSVELFEVNCAGCHPNGANIIRRSKNLKQKALKRYGYDSVDEIATLITNGKGLMSAYGDRLSEDEVTRLANYVLEQAAVNWKPTK	AWADTSVELFEVNCAGCHPNGANIIRRSKNLKQKALKRYGYDSVDEIATLITNGKGLMSAYGDRLSEDEVTRLANYVLEQAAVNWKPTK
Cytochrome c6BC	Leptolyngbya sp. NIES-3755	LEP3755_31220	ATGTTTAAAATTCTCGCGATCGTACTCAGTGCAATTCTATGGTTTGCACCACCCGCTTGGGCTGAATCTGCCCAGTTGTTTGAATTCCACTGTTCAGGCTGTCACGTCAACGGCGGTAATATTGTACGGCGTGGTAAGACGCTGAAGTTGAAAGCATTAGAGAAGAATGGCTATGGAACGGTCGATGCGATCGCAGAAATTATCACGAACGGGAAAGGGAACATGTCCGCCTACAAAGAGCGATTGAGTGAGACGGAAATTCGTGATTTGGCACAATACGTGCTCGATCGAGCAAATCAGAACTGGAAATAG	MFKILAIVLSAILWFAPPAWAESAQLFEFHCSGCHVNGGNIVRRGKTLKLKALEKNGYGTVDAIAEIITNGKGNMSAYKERLSETEIRDLAQYVLDRANQNWK	PAWAESAQLFEFHCSGCHVNGGNIVRRGKTLKLKALEKNGYGTVDAIAEIITNGKGNMSAYKERLSETEIRDLAQYVLDRANQNWK
Cytochrome c6BC	Leptolyngbya sp. O-77	O77CONTIG1_02937	ATGCGTCTTTTTCTCATCGCACTGCTATCTTTTTTACTGGTTTTTAGCCCGTCACTTCCCGTTCACGCTGCTGATCTAGAGACGGGTGCAGCTGTGTTCGAGGTTCACTGCGCGGGCTGTCACGTCAACGGGGGCAATATCATTCGGCGCGGCAAGAATTTGAGGCAGCCCGCACTGGAGAAGAACGGCTATGCCACGATAGAGGCGATCGCCCAGATTGTCGCCAATGGCAAGGCGAATATGTCTGCCTACAAAGACAAGCTCACGGCCGAAGAAATCGAATCCGTAGCAGCCTACGTCCTCGATCGTGCCGCTGCGGGGTGGAAATCCTGA	MRLFLIALLSFLLVFSPSLPVHAADLETGAAVFEVHCAGCHVNGGNIIRRGKNLRQPALEKNGYATIEAIAQIVANGKANMSAYKDKLTAEEIESVAAYVLDRAAAGWKS	ADLETGAAVFEVHCAGCHVNGGNIIRRGKNLRQPALEKNGYATIEAIAQIVANGKANMSAYKDKLTAEEIESVAAYVLDRAAAGWKS
Cytochrome c6BC	Leptolyngbya sp. PCC 7376	Lepto7376_1764	ATGAGCAAGCAAGTTATCCGCATTATTATCATCGCCATGATTATTCTGTTGGCACTGCCAGTATTGATTGCACCAGCTTTCTCAGCAGAGCTACCCGATGGCGCACAGGTTTTTGAATCCACTTGTGCAGGCTGTCATGTCAATGGTGGCAATATTATTCGTCGTGGTAAAAATCTTAAGCAACGAGCCATGGAAAAGTATGGCTTTACATCTGTCGAAAACATTACAGAGATTATCAATAATGGTAAAGGTAGTATGTCTGCCTATGGCGATCGCCTCACCGCAGAAGAAACCCAAGCTGTTTCCGAATACGTTCTTACCCAATCCCAAAAGAACTGGAAAAACTAG	MSKQVIRIIIIAMIILLALPVLIAPAFSAELPDGAQVFESTCAGCHVNGGNIIRRGKNLKQRAMEKYGFTSVENITEIINNGKGSMSAYGDRLTAEETQAVSEYVLTQSQKNWKN	AELPDGAQVFESTCAGCHVNGGNIIRRGKNLKQRAMEKYGFTSVENITEIINNGKGSMSAYGDRLTAEETQAVSEYVLTQSQKNWKN
Cytochrome c6BC	Leptolyngbya valderiana BDU 20041	AY599_00560	ATGATGAGAGTATTAATACTAATCTTACTTTTAATTTTAGGCTTATCGGGAATGGCGGTCAACGCAGCAGATTTGGACAACGGCGAAGCGATTTTCGATCGGTATTGCGTGGGATGCCACGTTAACGGCGGTAATATTATCCGTCGGGGAAAAACGCTGAAACAACGGGCTTTGCGGCGTTACGGACGGGATACGCCCGAAGCGATCGCCGAACTGGTCAAAAATGGTAAAAACAATATGTCTGCCTACGGCGATCGCCTCAGCGACGAAGAAATTGCAGACGTGACGGCTTACGTCCTCGATCGCGCTGCGAACAACTGGCGATCGAGATAA	MMRVLILILLLILGLSGMAVNAADLDNGEAIFDRYCVGCHVNGGNIIRRGKTLKQRALRRYGRDTPEAIAELVKNGKNNMSAYGDRLSDEEIADVTAYVLDRAANNWRSR	ADLDNGEAIFDRYCVGCHVNGGNIIRRGKTLKQRALRRYGRDTPEAIAELVKNGKNNMSAYGDRLSDEEIADVTAYVLDRAANNWRSR
Cytochrome c6BC	Limnoraphis robusta CS-951	WN50_25025	ATCACCAAAATATTAACCTGTTTTATTCTCATTTTAACCTTTGTGATGTTAACTGTTACTTCTCCCGTGAAGGCGGATGACCTCAGTAACGGTGCTAAAATTTTTAACTTGCAATGTGCGGGTTGTCATGGGGGAGGTGGTAATATTATCAGACGGGGTAAAACGTTAAAGAAAAAGGCATTAGATCGAAATGGATATGATACCCTTGAGGCGATTTCTTACTTAGTTAGTCAGGGTAAAGCGAATATGCCTGCTTATAAAGAACGTTTAACCCCAAAAGAAATTCAAGATGTTTCTGAGTATGTAATCAAGCAAGCTGAAAAAAATTGGCAGTCGTAG	MTKILTCFILILTFVMLTVTSPVKADDLSNGAKIFNLQCAGCHGGGGNIIRRGKTLKKKALDRNGYDTLEAISYLVSQGKANMPAYKERLTPKEIQDVSEYVIKQAEKNWQS	DDLSNGAKIFNLQCAGCHGGGGNIIRRGKTLKKKALDRNGYDTLEAISYLVSQGKANMPAYKERLTPKEIQDVSEYVIKQAEKNWQS
Cytochrome c6BC	Limnospira indica PCC 8005	ARTHRO_1530025	ATGAGAAATCTGTTAACTATTTTACTGCTGAGTGTTAGTTTATTGTGGGGTTGTTGGACACCAAAGGCGATCGCAGATAATCTGAATATTGAGAAGGGGGGGGAAATTTTTAGCGTCCACTGTGTGGGCTGTCATGCTGGTGGTGGTAACATTATTAGGCGGGGTAAAAATCTGAAACAGCGGGCTCTCCAACGGAATGGCTACGACTCAATAGAGGCGATCGCAGAAATTGTGGCTAATGGTAAAAGCAATATGTCGGCTTATTCTGACCGTCTGAGTGTCTCGGAAATTCAACAGGTCGCCGCCTATGTCTTAGACCAAGCCGAGAAAAATTGGCGTTAA	MRNLLTILLLSVSLLWGCWTPKAIADNLNIEKGGEIFSVHCVGCHAGGGNIIRRGKNLKQRALQRNGYDSIEAIAEIVANGKSNMSAYSDRLSVSEIQQVAAYVLDQAEKNWR	LNIEKGGEIFSVHCVGCHAGGGNIIRRGKNLKQRALQRNGYDSIEAIAEIVANGKSNMSAYSDRLSVSEIQQVAAYVLDQAEKNWR
Cytochrome c6BC	Limnothrix rosea IAM M-220	NIES208_16125	ATGAATAAAAAAGTTGTGCAGATTATCGTCATTGCGATGATTATCCTACTGGCATTACCAGTGCTCATTGCCCCGGCCTTGTCTGCTGAGCTACCGAGTGGAGAACAGGTCTTTGAATCAACTTGCGCTGGTTGCCATATCAACGGTGGCAATATTATTCGCCGTGGCAAAAATCTCAAACAACGGGCGATGGAAAAACATGGTTATACTTCCGTCGAAAGCATCGCAGAGATTGTCGCGAACGGTAAAGGTAATATGTCGGCCTACGGCGATCGCCTCACCAGTGAAGAGATCCAAGCCGTTTCAGAATATGTGTTAGCGCAATCCCAGAAAAACTGGAAATCCTAA	MNKKVVQIIVIAMIILLALPVLIAPALSAELPSGEQVFESTCAGCHINGGNIIRRGKNLKQRAMEKHGYTSVESIAEIVANGKGNMSAYGDRLTSEEIQAVSEYVLAQSQKNWKS	AELPSGEQVFESTCAGCHINGGNIIRRGKNLKQRAMEKHGYTSVESIAEIVANGKGNMSAYGDRLTSEEIQAVSEYVLAQSQKNWKS
Cytochrome c6BC	Lyngbya aestuarii BL J	M595_6201	ATGAAAATTCATCAAACCTTCATCCATTTTCTCCTGATTGTTACTTTAGTCTTGTTCACTTTTGCTTCTCCAGTTCAAGCGGCTAACTCCCAAAATGGTGCTAAGATTTTTAACCTGCAATGTGCGGGTTGTCATGTCGGAGGCGGTAATATTATCAGATGGGGGAAAACGCTCAAGAAAAACGCATTAAACCGCAATGGATATGATACGATTGAGGCGATTTCTTACTTAGTTACTCAGGGGAAAGGTAATATGCCTGCTTATAAAGAACGTTTAACCCCCAAAGAAATAGAAGATGTTTCTGATTATGTGATGAAACAAGCGGAAAACAATTGGAAATCTTAG	MKIHQTFIHFLLIVTLVLFTFASPVQAANSQNGAKIFNLQCAGCHVGGGNIIRWGKTLKKNALNRNGYDTIEAISYLVTQGKGNMPAYKERLTPKEIEDVSDYVMKQAENNWKS	ANSQNGAKIFNLQCAGCHVGGGNIIRWGKTLKKNALNRNGYDTIEAISYLVTQGKGNMPAYKERLTPKEIEDVSDYVMKQAENNWKS
Cytochrome c6BC	Lyngbya sp. PCC 8106	L8106_14455	ATGAAAATCCACAAAATCTCAACCTCTTTTATCCTAATTTTTACTTTAGGCTTGCTGACTTTTCTTTCTCCAGTTCAAGCGGCTAACTCCCAAAATGGTGCTAAGGTTTTTAACCAGCAATGTGCGGGTTGTCATGCCGGAGGGGGTAATATTGTCAGATGGGGAAAAACGCTCAAGAAAAACGCATTAAATCGCAATGGATATGATACGATTGAGGCGATTTCTTACTTAGTTACTCAGGGTAAAGGGAATATGCCCGCTTATAAAGAACGTTTAACTCCCAAAGAAATTCAAGATGTTTCTGAGTATGTAATGAAACAAGCCGAAAAAAATTGGAAGTCTTAA	MKIHKISTSFILIFTLGLLTFLSPVQAANSQNGAKVFNQQCAGCHAGGGNIVRWGKTLKKNALNRNGYDTIEAISYLVTQGKGNMPAYKERLTPKEIQDVSEYVMKQAEKNWKS	ANSQNGAKVFNQQCAGCHAGGGNIVRWGKTLKKNALNRNGYDTIEAISYLVTQGKGNMPAYKERLTPKEIQDVSEYVMKQAEKNWKS
Cytochrome c6BC	Mastigocoleus testarum BC008	BC008_12620	ATGTATTCACTCAAGCAATTATGGAAATCGATAAAGCCTTTAAAGTTACTCTATATTTTGTTTTTTCTCCTATTACTTTCCAACACAGTTTTCCTCCCCAGCGCTTCAGCAATGAATATCCCAGCAGATATAACCAATGGCGAGAAGATTTTTAAAGCTAATTGTGCTGGTTGTCATATCAACGGTGGAAACATTATTAGGCGGGGAAAAAATTTAAAATTAAGGGCGTTGAAAAGATACAAAATGGATTCAGTAGAAGCAATTTCTGCGATTGTGGCAAATGGCAAGAATAATATGTCAGCCTACAAAGACCGTTTGAGTGTAACAGAAATTAGAGATGTTGCAGCTTATGTCCTAGGAAAAGCTGAAACTGGATGGAAGTAA	MYSLKQLWKSIKPLKLLYILFFLLLLSNTVFLPSASAMNIPADITNGEKIFKANCAGCHINGGNIIRRGKNLKLRALKRYKMDSVEAISAIVANGKNNMSAYKDRLSVTEIRDVAAYVLGKAETGWK	ADITNGEKIFKANCAGCHINGGNIIRRGKNLKLRALKRYKMDSVEAISAIVANGKNNMSAYKDRLSVTEIRDVAAYVLGKAETGWK
Cytochrome c6BC	Microcoleus asticus IPMA8	E5S67_03994	ATGATTTCGCTAAATAAATTTAAAAAATTTCTCAGCGCTTTTGTATTGATACTGATACTGGCTTTTGTAGAAATCGCCACTAATTGCCAAATCGCCCTCGCAGATACAGCTACAAATCCCGCAACCGCAGCCGAAGTGTTCAGCGCCAACTGTGCAGGTTGTCACATCAACGGTAGCAACATTATCAGGCGCGGCAAAAACTTGAAACAAAAAGCATTAAAAAAATACGGCATGGATTCCATCGCCAATATTTCCAACTTAGTAACCAACGGCAAAGGTATTATGCCCGCTTACAAAGATCGTTTGTCGGAACAACAAATTATCGATGTTTCAGCTTACGTGCTATCCCAAGCCGAAACCGATTGGAAATAA	MISLNKFKKFLSAFVLILILAFVEIATNCQIALADTATNPATAAEVFSANCAGCHINGSNIIRRGKNLKQKALKKYGMDSIANISNLVTNGKGIMPAYKDRLSEQQIIDVSAYVLSQAETDWK	TNPATAAEVFSANCAGCHINGSNIIRRGKNLKQKALKKYGMDSIANISNLVTNGKGIMPAYKDRLSEQQIIDVSAYVLSQAETDWK
Cytochrome c6BC	Microcoleus vaginatus FGP-2	MicvaDRAFT_2326	ATGATTTCGCTAAAGAACTTAAAAAAAATTCTCACCGCCTTTCTATTGATACTGACACTGGCATTTGTAGAAATCGCCACTAATTCCCAAATCGCCCTCGCAGATACAGCTACAAATCCCACAACGGCAGCCGAAGTCTTCAGCGCCAACTGTGCAGGCTGTCACATCAACGGCAGCAACATTATCAGGCGCGGCAAAAACTTGAAACAAAAAGCTTTAAAAAAATACGGTATGGATTCCATCGCCAACATTTCCAACTTAGTAATCAACGGCAAAGGTATTATGCCCGCTTACAAAGATCGTTTATCTGAACAACAAATTATCGATGTTTCAGCTTACGTGCTATCCCAAGCCGAAACCGATTGGAAATAG	MISLKNLKKILTAFLLILTLAFVEIATNSQIALADTATNPTTAAEVFSANCAGCHINGSNIIRRGKNLKQKALKKYGMDSIANISNLVINGKGIMPAYKDRLSEQQIIDVSAYVLSQAETDWK	TNPTTAAEVFSANCAGCHINGSNIIRRGKNLKQKALKKYGMDSIANISNLVINGKGIMPAYKDRLSEQQIIDVSAYVLSQAETDWK
Cytochrome c6BC	Nodularia spumigena CENA596	A2T98_00480	GTGCAAAAATTACTAATATTGTTAACGGTGACAATTTTTTTATTATTCAATAATTTTAGTTCTCCTGCGATGGGCTTTGCCCCGCCTTTGGCGATCGCAGCCGATACAAATCATGGCGCAGAAGTTTTTAGCGTTCATTGTGCAGGTTGTCATATCAATGGCGGTAACATTATCCGTCGGGGGAAAAATTTAAAAGAAAAAGCCCTAAAAAGATATGGTATGGACACCATAGAGGCAGTTACATCTATAATTACTAATGGTAAAAATAATATGTCAGCCTACGCAGACCGTCTGACTCCCCAGGAAATTCAAGAAGTTGCAACTTATGTCCTTGAACAAGCCCAAACAGGTTGGCGTTAA	MQKLLILLTVTIFLLFNNFSSPAMGFAPPLAIAADTNHGAEVFSVHCAGCHINGGNIIRRGKNLKEKALKRYGMDTIEAVTSIITNGKNNMSAYADRLTPQEIQEVATYVLEQAQTGWR	ADTNHGAEVFSVHCAGCHINGGNIIRRGKNLKEKALKRYGMDTIEAVTSIITNGKNNMSAYADRLTPQEIQEVATYVLEQAQTGWR
Cytochrome c6BC	Nodularia spumigena UHCC 0039	BMF81_00668	GTGCAAAAACTACTAATATTGTTATTAGTGACAATTTTCCTATCATTCAATAATTTTACCTTACCTGCGATCGCTGCCGAAACAAATCATGGCGCGGAAGTTTTTAGCGTTCATTGTGCGGGGTGTCATATCAATGGCGGTAACATTATCCGCCGGGGGAAAAACTTAAAAAAGCCAGCCCTAAAAAGATATGGTATGGACACCATAGAGGCAGTTACATCTATAATTACCAATGGTAAAAATAATATGTCAGCCTATCAAGACCGCCTAACTCCCCAGGAAATTCAAGAAGTTGCAACTTATGTCCTCGAACAAGCCCAAACAGGTTGGCGTTAA	MQKLLILLLVTIFLSFNNFTLPAIAAETNHGAEVFSVHCAGCHINGGNIIRRGKNLKKPALKRYGMDTIEAVTSIITNGKNNMSAYQDRLTPQEIQEVATYVLEQAQTGWR	AETNHGAEVFSVHCAGCHINGGNIIRRGKNLKKPALKRYGMDTIEAVTSIITNGKNNMSAYQDRLTPQEIQEVATYVLEQAQTGWR
Cytochrome c6BC	Nostoc calcicola FACHB-389	FACHB389_35425	GTGAAAAAACTCTTAACATTGGTATTAGTAACTTTTCTATTATTGATAAGTACTTTGACGTTCCCAGCTAATGCAGCAGATACAGCCAACGGCGAACAAATATTCAGCGTTCATTGTGCTGGTTGTCATATTAATGGTGGTAACATAGTCAGGCGAGGTAAAAACCTCAAAAAGCAAGCGCTCAAAAAATATGGTATGGATTCAATAGAGGCAGTTACATCGATAGTTACCAATGGTAAAAATAATATGTCAGCCTACAAAGACCGCTTGACTGAACAGCAAATTCAAGATGTTGCTGTTTATGTTATTGAACAAGCTGAAAAAGGCTGGCGTTAA	MKKLLTLVLVTFLLLISTLTFPANAADTANGEQIFSVHCAGCHINGGNIVRRGKNLKKQALKKYGMDSIEAVTSIVTNGKNNMSAYKDRLTEQQIQDVAVYVIEQAEKGWR	ADTANGEQIFSVHCAGCHINGGNIVRRGKNLKKQALKKYGMDSIEAVTSIVTNGKNNMSAYKDRLTEQQIQDVAVYVIEQAEKGWR
Cytochrome c6BC	Nostoc cycadae WK-1	NCWK1_5164	ATGATTAACGCCAAAGCACAAATCAAGCTCATGAGAATTAACTTGCTAAAAATCCTGGCATTAGTATGTTTAATTCTCCTGCTATCTACCACTACATTTACCTTGCCTGCTAGTGCAAGCGACACAGCTAATGGTGCAGAAATATTTAGCGTGCATTGCGCCGGCTGTCATATCAACGGTAGTAACATTATCCGACGAGGCAAGAACTTAAAAAAGCCAGCACTGAAGAAATATAATATGGATTCTATCGAGGCAATTACAGCCATTGTCACTAATGGTAAAAGTAATATGTCTGCCTACAAAGACCGCCTCACAGAACAACAAATTCAAGATGTTGCGGCTTACGTTCTAGAACAAGCTGCAAAAGACTGGCGTTAA	MINAKAQIKLMRINLLKILALVCLILLLSTTTFTLPASASDTANGAEIFSVHCAGCHINGSNIIRRGKNLKKPALKKYNMDSIEAITAIVTNGKSNMSAYKDRLTEQQIQDVAAYVLEQAAKDWR	SDTANGAEIFSVHCAGCHINGSNIIRRGKNLKKPALKKYNMDSIEAITAIVTNGKSNMSAYKDRLTEQQIQDVAAYVLEQAAKDWR
Cytochrome c6BC	Nostoc flagelliforme CCNUN1	COO91_02607	TTGACTTTACCTGCTAGTGCAGCAAATACAGTTAACGGCGAACAAATATTTAGTGTTCATTGTGCTGGTTGTCATATCAACGGCAGCAATATCATCAGGCGAGGTAAAAATCTCAAAAAGCAAGCGCTGAAAAAGTATGGTATGGATTCAATAGAGGCAGTTACATCTATAGTTACCAATGGTAAAAATAATATGTCAGCCTACAAAGAGCGTCTCACTGAAGAGCAAATTCAAGACGTTGCTGCTTACGTTCTCGAACAAGCTGAAAAAGACTGGCGTTAG	MTLPASAANTVNGEQIFSVHCAGCHINGSNIIRRGKNLKKQALKKYGMDSIEAVTSIVTNGKNNMSAYKERLTEEQIQDVAAYVLEQAEKDWR	ANTVNGEQIFSVHCAGCHINGSNIIRRGKNLKKQALKKYGMDSIEAVTSIVTNGKNNMSAYKERLTEEQIQDVAAYVLEQAEKDWR
Cytochrome c6BC	Nostoc linckia NIES-25	NIES25_14350	GTGAAAAAACTCTTAACATTGGTATTAGTAACTTTTCTATTATTGATAAGTACTTTGACGTTCCCAGCTAATGCAGCAGATACAGCCAACGGCGAACAAATATTCAGCGTTCATTGTGCTGGTTGTCATATTAATGGTGGTAACATAGTCAGGCGAGGTAAAAACCTCAAAAAGCAAGCACTTAAGAAATATGGTATGGATTCAATAGAGGCAGTTACATCGATAGTTACCAATGGTAAAAATAATATGTCAGCCTACAAAGACCGCTTGACTGAACAGCAAATTCAAGATGTTGCTGTTTATGTTATTGAACAAGCTGAAAAAGGCTGGCGTTAA	MKKLLTLVLVTFLLLISTLTFPANAADTANGEQIFSVHCAGCHINGGNIVRRGKNLKKQALKKYGMDSIEAVTSIVTNGKNNMSAYKDRLTEQQIQDVAVYVIEQAEKGWR	ADTANGEQIFSVHCAGCHINGGNIVRRGKNLKKQALKKYGMDSIEAVTSIVTNGKNNMSAYKDRLTEQQIQDVAVYVIEQAEKGWR
Cytochrome c6BC	Nostoc linckia z1	VF02_19310	GTGAAAAAACTCCTAACATTGATATTAGTAACTTTTGTATTATTGATAAATACTTTGACGTTACCAGCAAATGCCGCGGATATAGCCAACGGCCAACAAATATTCAGCATTCATTGTGCTGGTTGTCATATTAATGGTGGTAACATAGTCAGGCGAGGTAAAAACCTGAAAAAGCAGACCCTTAAGAAATATGGTATGGATTCAATGGAGGCAGTTATATCGATAGTTACTAATGGTAAAAATAATATGTCAGCCTACAAAGACCGCTTGAGTGAACAGCAAATTCAAGATGTTGCTGCTTATCTTCTCGAACAAGCTGAAAAAGGCTGGCGGTAA	MKKLLTLILVTFVLLINTLTLPANAADIANGQQIFSIHCAGCHINGGNIVRRGKNLKKQTLKKYGMDSMEAVISIVTNGKNNMSAYKDRLSEQQIQDVAAYLLEQAEKGWR	ADIANGQQIFSIHCAGCHINGGNIVRRGKNLKKQTLKKYGMDSMEAVISIVTNGKNNMSAYKDRLSEQQIQDVAAYLLEQAEKGWR
Cytochrome c6BC	Nostoc punctiforme PCC 73102	Npun_F1886	TTGAAAAAACTACTCACATTAGTATTAGTAACATTTCTGCTATTGTTCAGCGCTTTTACTATGCCTGCTATGGCAGCAGATATAGTTAACGGTGAACAAATATTTAGTCTTCATTGTGCTGGTTGTCATATTAACGGCAGCAACATAGTTAGGCGGGGTAAAAATCTCAAAAAGCAAGCACTGAAAAAGTATGGTATGGATTCAATAGAGGCAGTTACATCTATAGTTACCAATGGTAAAAATAATATGTCAGCCTACAAAGATCGCCTTACTGAACAGCAAATTACAGATGTTGCTGCTTACGTTCTCGAACAAGCTGAAAAAGACTGGCGTTAG	MKKLLTLVLVTFLLLFSAFTMPAMAADIVNGEQIFSLHCAGCHINGSNIVRRGKNLKKQALKKYGMDSIEAVTSIVTNGKNNMSAYKDRLTEQQITDVAAYVLEQAEKDWR	ADIVNGEQIFSLHCAGCHINGSNIVRRGKNLKKQALKKYGMDSIEAVTSIVTNGKNNMSAYKDRLTEQQITDVAAYVLEQAEKDWR
Cytochrome c6BC	Nostoc sp. 'Lobaria pulmonaria (5183) cyanobiont'	NLP_3084	TTGAAGAAACTACTTACATTAGTATTAGTAACGTTTTTGTTATTAATCAGTACTTTTACTTTACCTGCTAGTGCAGCAGACACAGTTAACGGTGAACAAATATTTAGCGTTCATTGTGCTGGTTGTCATATCAACGGCAGCAATATAATTCGGCGAGGTAAAAATCTAAAAAAGCCAGCCCTGAAAAAGTATGGTATGGATTCAATAGAGGCAGTTACATCTATAGTTACCAATGGTAAAAATAATATGTCAGCTTACAAAAAGCGTCTCAGCGAACAGCAAATTCAAGACGTTACTGCTTACGTTCTCGAACAAGCTGAAAAAGGCTGGCGTTAA	MKKLLTLVLVTFLLLISTFTLPASAADTVNGEQIFSVHCAGCHINGSNIIRRGKNLKKPALKKYGMDSIEAVTSIVTNGKNNMSAYKKRLSEQQIQDVTAYVLEQAEKGWR	ADTVNGEQIFSVHCAGCHINGSNIIRRGKNLKKPALKKYGMDSIEAVTSIVTNGKNNMSAYKKRLSEQQIQDVTAYVLEQAEKGWR
Cytochrome c6BC	Nostoc sp. 'Peltigera membranacea cyanobiont' 210A	CDG76_33875	TTGAAGAAACTACTTACATTAGTATTAGTAACGTTTTTGTTATTAATCAGTACTTTTACTTTGCCTGCTAGTGCAGCAGACACAGTTAATGGCGAACAAATATTTAGTGTTCATTGTGCTGGTTGTCATATCAACGGTAGCAACATCATCAGGCGAGGTAAAAATCTCAAAAAGCCAGCCCTGAAAAAGTATGGTATGGATTCAATAGAGGCAGTTACATCTATAGTTACCAATGGTAAAAATAATATGTCAGCCTACAAAGAGCGTCTCACTGAACAGCAAATTCAAGACGTTGCTGCTTACGTTCTCGAACAAGCTGAAAAAGGCTGGCATTAA	MKKLLTLVLVTFLLLISTFTLPASAADTVNGEQIFSVHCAGCHINGSNIIRRGKNLKKPALKKYGMDSIEAVTSIVTNGKNNMSAYKERLTEQQIQDVAAYVLEQAEKGWH	ADTVNGEQIFSVHCAGCHINGSNIIRRGKNLKKPALKKYGMDSIEAVTSIVTNGKNNMSAYKERLTEQQIQDVAAYVLEQAEKGWH
Cytochrome c6BC	Nostoc sp. 'Peltigera membranacea cyanobiont' 213	CDG77_07505	TTGAAAAAAATACTCACATTAGTATTAGTAACATTTTTGTTATTGATAAGTACTTTTACTTTCCCTGCTAGTGCGGCAGACACAGTTAACGGCGAACAAATATTTAGTGTTCATTGTGCTGGTTGTCATATTAACGGTAGCAACATAGTCAGGCGTGGAAAAAATCTCAAAAAGCAAGCCCTAAAAAAGTATGGAATGGATTCAATAGAGGCAATTACATCCATAGTTACCAATGGTAAAAATAATATGTCAGCCTACAAAGAGCGTCTCACTGAACAGCAAATTCAAGACGTTAGTGCTTATGTTCTCGAACAAGCTGAAAAAGGCTGGCGTTAG	MKKILTLVLVTFLLLISTFTFPASAADTVNGEQIFSVHCAGCHINGSNIVRRGKNLKKQALKKYGMDSIEAITSIVTNGKNNMSAYKERLTEQQIQDVSAYVLEQAEKGWR	ADTVNGEQIFSVHCAGCHINGSNIVRRGKNLKKQALKKYGMDSIEAITSIVTNGKNNMSAYKERLTEQQIQDVSAYVLEQAEKGWR
Cytochrome c6BC	Nostoc sp. 106C	BV375_29150	GTGATGAAACTAATAAAATTGATATTAGTCGCTTTCTTTATATTGTCAAGTATTCTTACCCCGTCAGCGAAAGCAGAAGATATAGTTAGCGGTGCACAAATCTTTGATATTCATTGTGCTGGTTGCCATGTTAATGGTGGTAATATTGTCAGACGAGGTAAGACCTTGAAGAAAAAAGCCCTCAAGAAATATGGTATGGATTCTTTAGAGGCAATATCATCAATTGTTACTAACGGTAAAAGTAATATGCCAGCGTACAAAGATCGCCTGACTACAGAGCAAATTCAAGCTGTCGCCGCTTACGTTTTAGAACAATCTGAAAAAGATTGGCGTTAA	MMKLIKLILVAFFILSSILTPSAKAEDIVSGAQIFDIHCAGCHVNGGNIVRRGKTLKKKALKKYGMDSLEAISSIVTNGKSNMPAYKDRLTTEQIQAVAAYVLEQSEKDWR	EDIVSGAQIFDIHCAGCHVNGGNIVRRGKTLKKKALKKYGMDSLEAISSIVTNGKSNMPAYKDRLTTEQIQAVAAYVLEQSEKDWR
Cytochrome c6BC	Nostoc sp. ATCC 53789	A6V25_00060	TTGAAAAAACTACTCACATTAGTATTAGTAACATTGCTGCTATTGTTCAGCGCTTTTACTATGCCTGCAATGGCAGCAGACATAGTTAACGGTGAACAAATATTTAGTCTTCATTGTGCTGGTTGTCATATTAACGGCAGCAACATAATTAGGCGGGGTAAAAATCTCAAAAAGCAAGCGCTGAAAAAGTATGGTATGGATTCAATAGAGGCAGTTACATCTATAGTTACCAATGGTAAAAATAATATGTCAGCCTACAAAGAGCGCCTTACTGAACAGCAAATTACAGATGTTTCTGCTTACGTTCTCGAACAAGCTGAAAAAGACTGGCGTTAG	MKKLLTLVLVTLLLLFSAFTMPAMAADIVNGEQIFSLHCAGCHINGSNIIRRGKNLKKQALKKYGMDSIEAVTSIVTNGKNNMSAYKERLTEQQITDVSAYVLEQAEKDWR	ADIVNGEQIFSLHCAGCHINGSNIIRRGKNLKKQALKKYGMDSIEAVTSIVTNGKNNMSAYKERLTEQQITDVSAYVLEQAEKDWR
Cytochrome c6BC	Nostoc sp. CENA543	CLI64_17480	GTGAAAAAAATATTTACATTAGTATTTATCATGTTATTGATTGCCTTTAATTTTCCGTTACCCGTCAATGCAGTAGATACAGCAAATGGTGCGGAAATATTCAGTGTTCATTGCGCTGGTTGTCATATTAATGGGGGTAACATTGTCAGGCGCGGTAAGAACTTACAAAAAAAGGCACTCAAAAAATATGGTATGGACTCCATAGAAGCTGTTACAGATATTGTAACTAATGGTAAAAATAATATGTCAGCTTACAAAGACCGCCTGACTGAGCAAGAAATTCAAAATGTTACTGCTTATGTTTTAGAGCAAGCAGAAAAAGGATGGCGGTAA	MKKIFTLVFIMLLIAFNFPLPVNAVDTANGAEIFSVHCAGCHINGGNIVRRGKNLQKKALKKYGMDSIEAVTDIVTNGKNNMSAYKDRLTEQEIQNVTAYVLEQAEKGWR	VDTANGAEIFSVHCAGCHINGGNIVRRGKNLQKKALKKYGMDSIEAVTDIVTNGKNNMSAYKDRLTEQEIQNVTAYVLEQAEKGWR
Cytochrome c6BC	Nostoc sp. NIES-3756	NOS3756_45460	GTGCAGAAATTACTCAAATTAGTATTAGTAACTATTCTATTTTTCATCAGTACCTTTACCTCACCTGCAAATGCAGCAGACACAGCCAATGGTGAACAACTTTTTAACGTTCACTGCGCTGGTTGTCATATCAACGGTGGGAACATAGTCAGACGCGGTAAGAACTTGCAAAAGAAGGCGTTAAAAAAATATGCTATGGATTCGCTAGAAGCGGTTGAATCTATCATCACTAATGGTAAAAATAATATGTCCGCTTACAAAGACCGTCTCAGCGTACAGGAAATACAAGATGTTGCGGCTTATGTTCTAGAACAAGCAGAAAAAGGCTGGCGGTAG	MQKLLKLVLVTILFFISTFTSPANAADTANGEQLFNVHCAGCHINGGNIVRRGKNLQKKALKKYAMDSLEAVESIITNGKNNMSAYKDRLSVQEIQDVAAYVLEQAEKGWR	ADTANGEQLFNVHCAGCHINGGNIVRRGKNLQKKALKKYAMDSLEAVESIITNGKNNMSAYKDRLSVQEIQDVAAYVLEQAEKGWR
Cytochrome c6BC	Nostoc sp. NIES-2111	NIES2111_10130	GTGCAGAAATTACTCAAATTAGTATTAGTAACTATTCTATTTTTCATCAGTACCTTTACCTCACCTGCAAATGCAGCAGACACAGCCAATGGTAAACAACTTTTTAACGTTCACTGCGTTGGTTGTCATATCAACGGTGGGAACATAGTCAGACGCGGTAAGAACTTGCAAAAAAAGGCGTTAAAAAAATATGGTATGGATTCGCTAGAAGCGGTTGAATCTATCATCACTAATGGTAAAAATAATATGTCCGCTTACAAAGACCGTCTCAGCGTACAGGAAATACAAGATGTTGCGGCTTATGTTCTAGAACAAGCAGAAAAAGGCTGGCGGTAG	MQKLLKLVLVTILFFISTFTSPANAADTANGKQLFNVHCVGCHINGGNIVRRGKNLQKKALKKYGMDSLEAVESIITNGKNNMSAYKDRLSVQEIQDVAAYVLEQAEKGWR	ADTANGKQLFNVHCVGCHINGGNIVRRGKNLQKKALKKYGMDSLEAVESIITNGKNNMSAYKDRLSVQEIQDVAAYVLEQAEKGWR
Cytochrome c6BC	Nostoc sp. PCC 7107	Nos7107_4152	ATGATTAACGCCAAATCACAAATCAAGCTCATGAGAATTAACTTGCTAAAAATCCTGCAATTAGTATGTTTAATTCTCTTGTTATCTACCACTAATTTTACCTTACCTGCTAGTGCCAGTGATACAGCTAATGGTGCAGAAATATTTAGTGTGCATTGTGCTGGCTGTCATATCAATGGTAGTAACATTATCCGACGAGGAAAGAATTTAAAAAAGCCAGCGCTGAAGAAATACAATATGGATTCCATAGAGGCAATTACATCGATTGTCACTAATGGTAAAAGTAATATGTCTGCCTACAAAGACCGCCTCACGGAACAACAAATTCAAGATGTTGCGACTTACGTTCTGGAACAAGCTGCAAAAGACTGGCGTTAA	MINAKSQIKLMRINLLKILQLVCLILLLSTTNFTLPASASDTANGAEIFSVHCAGCHINGSNIIRRGKNLKKPALKKYNMDSIEAITSIVTNGKSNMSAYKDRLTEQQIQDVATYVLEQAAKDWR	SDTANGAEIFSVHCAGCHINGSNIIRRGKNLKKPALKKYNMDSIEAITSIVTNGKSNMSAYKDRLTEQQIQDVATYVLEQAAKDWR
Cytochrome c6BC	Nostoc sp. PCC 7120 = FACHB-418	all0161	GTGCAGAAATTTCTCAAATTAGTATTAGTAACCTTTTTATTCTTGATAAGTACTTTGACTCCGCCTGCAAATGCAGAAAATACAATCAATGGCGAACAAATCTTTAGTGTTCACTGTGCAGGTTGTCATATCAATGGTAGTAATATTATCCGGCGTGGTAAGAACTTGCAAAAGAAGACGCTAAAAAAATATGGGATGGATTCCCTAGAAGCCATTGAAGCGATCGTCACTAATGGTAAAAATAATATGTCAGCCTACAAAGACCGTCTCAGTGAACAAGAAATTCAAGATGTGGCGGCTTACGTTCTAGAACAAGCAGAAAAAGGCTGGCGTTAA	MQKFLKLVLVTFLFLISTLTPPANAENTINGEQIFSVHCAGCHINGSNIIRRGKNLQKKTLKKYGMDSLEAIEAIVTNGKNNMSAYKDRLSEQEIQDVAAYVLEQAEKGWR	ENTINGEQIFSVHCAGCHINGSNIIRRGKNLQKKTLKKYGMDSLEAIEAIVTNGKNNMSAYKDRLSEQEIQDVAAYVLEQAEKGWR
Cytochrome c6BC	Nostoc sp. RF31YmG	BV378_30880	GTGATGAAACTAATAAAATTGATATTAGTCGCTTTCTTTATATTGTCAAGTATTCTTACCCCGTCAGCGAAAGCAGAAGATATAGTTAGCGGTGCACAAATCTTTGATATTCATTGTGCTGGTTGCCATGTTAATGGTGGTAATATTGTCAGACGAGGTAAGACCTTGAAGAAAAAAGCCCTCAAGAAATATGGTATGGATTCTTTAGAGGCAATATCATCAATTGTTACTAACGGTAAAAGTAATATGCCAGCGTACAAAGATCGCCTGACTACAGAGCAAATTCAAGCTGTCGCCGCTTACGTTTTAGAACAATCTGAAAAAGATTGGCGTTAA	MMKLIKLILVAFFILSSILTPSAKAEDIVSGAQIFDIHCAGCHVNGGNIVRRGKTLKKKALKKYGMDSLEAISSIVTNGKSNMPAYKDRLTTEQIQAVAAYVLEQSEKDWR	EDIVSGAQIFDIHCAGCHVNGGNIVRRGKTLKKKALKKYGMDSLEAISSIVTNGKSNMPAYKDRLTTEQIQAVAAYVLEQSEKDWR
Cytochrome c6BC	Nostoc sp. T09	BV372_11270	ATGCAAGTAATGAAACTAATAAAATTGATATTAGTTGCTTTCTTTATATTGACAAGTATTCTTACCCCGTCAGCGAAGGCAGCGGATATAGTTAGTGGTGCACAAATCTTTGATATTCATTGTGCTGGTTGCCATGTTAATGGTGGTAATATTGTCAGGCGAGGTAAGACTTTGAAGAAAAAAGTACTCAAAAAATATGGAATGGATTCTTTAGAGGCAATATCATCAATTGTTACTAATGGTAAAAGTAATATGCCAGCGTACAAAGATCGCCTGACTACAGAGCAAATTCAAGCTGTCGCCGCTTACGTTTTAGAACAATCTGAAAAGGATTGGCGTTAA	MQVMKLIKLILVAFFILTSILTPSAKAADIVSGAQIFDIHCAGCHVNGGNIVRRGKTLKKKVLKKYGMDSLEAISSIVTNGKSNMPAYKDRLTTEQIQAVAAYVLEQSEKDWR	ADIVSGAQIFDIHCAGCHVNGGNIVRRGKTLKKKVLKKYGMDSLEAISSIVTNGKSNMPAYKDRLTTEQIQAVAAYVLEQSEKDWR
Cytochrome c6BC	Nostoc sphaeroides CCNUC1	GXM_00211	TTGAAAAAACTAGTCACATTAGTATTAGTAACATTTTTGTTATCGATAAGCACTTTTATACCTGCTAGTGCAGCAGACACGGTTAACGGTGAACAAATATTTAGTGTTCATTGTGCTGGTTGTCATATCAACGGTAGCAACATCATTAGGCGAGGTAAAAATCTCAAAAAGCAAGCGCTGAAAAAGTATGGCATGGATTCAATAGAGGCAGTTACATCTATAGTTACCAATGGTAAAAATAATATGTCAGCCTACAAAGAACGCCTCAGTGAACAGCAAATTAAAGATGTTGCTGCTTACGTTCTCGAACAAGCTGAAAAAGACTGGCGTTAA	MKKLVTLVLVTFLLSISTFIPASAADTVNGEQIFSVHCAGCHINGSNIIRRGKNLKKQALKKYGMDSIEAVTSIVTNGKNNMSAYKERLSEQQIKDVAAYVLEQAEKDWR	ADTVNGEQIFSVHCAGCHINGSNIIRRGKNLKKQALKKYGMDSIEAVTSIVTNGKNNMSAYKERLSEQQIKDVAAYVLEQAEKDWR
Cytochrome c6BC	Okeania hirsuta	D4Z78_16235	GTGAAAAAAATAATTACAGTTTGCTTATTAATATTCACATTGATAAACTTTATAGAAATACCTCCTGCATTAGCAGCAGAAACAGCGAAAGGAGCAGAAATTTTTCAAATTAATTGTGCTGGATGTCATGCTGGAGGAGGCAATATAGTTAGATGGTGGAAAAACTTAAAAATCAGAACTTTGAAAAGAAATAAACTAGATTCTGTTGAGGCGATCGCTTACTTAGTTAAGAATGGAAAAAATAATATGTCTGCTTACAAAGACCGTTTAACAGAAACAGAGATAGAAACTGTATCAGATTATGTATTGAAGCAGGCAGAAAATGGTTGGCATTAG	MKKIITVCLLIFTLINFIEIPPALAAETAKGAEIFQINCAGCHAGGGNIVRWWKNLKIRTLKRNKLDSVEAIAYLVKNGKNNMSAYKDRLTETEIETVSDYVLKQAENGWH	AETAKGAEIFQINCAGCHAGGGNIVRWWKNLKIRTLKRNKLDSVEAIAYLVKNGKNNMSAYKDRLTETEIETVSDYVLKQAENGWH
Cytochrome c6BC	Oscillatoria nigro-viridis PCC 7112	Osc7112_3243	ATGATTTCGCTAAAAAACTTAAAAAAAAATCTCACCGCCTTTCTATTGATCCTGACACTGGCATTTGTAGAAATCGCCACTAATTCCCAAATTGCGATCGCAGATACAGCTACAAATCCCGCAACCGCAGCCGAAGTCTTCACCGCCAACTGTGCAGGCTGTCACATCAACGGCAGCAACATTATCAGGCGCGGCAAAAACTTGAAACAAAAAGCATTAAAAAAATACGGCATGGATTCCATCGCCAACATTTCCAACTTAGTAACCAACGGCAAAGGTATTATGCCCGCTTACAAAAATCGTTTGTCGGAACAACAAATTATCGATGTTTCAGCTTACGTGCTATCCCAAGCCGAAACCGATTGGAAATAA	MISLKNLKKNLTAFLLILTLAFVEIATNSQIAIADTATNPATAAEVFTANCAGCHINGSNIIRRGKNLKQKALKKYGMDSIANISNLVTNGKGIMPAYKNRLSEQQIIDVSAYVLSQAETDWK	TNPATAAEVFTANCAGCHINGSNIIRRGKNLKQKALKKYGMDSIANISNLVTNGKGIMPAYKNRLSEQQIIDVSAYVLSQAETDWK
Cytochrome c6BC	Phormidesmis priestleyi ULC007	C7B65_16225	ATGATTCAGCGATTATTGATAATTGGATGGAGCGCGATCGTCTTTTTGATCAGTTCATTAACCCTCCCGGCTCTTGCCGCAGACTTGACGAGTGGTGCCAAACTATTTGAGGTGCAGTGTGCGGGATGCCATGCTAACGGCGGTAACATTGTGCGACGCGGCAAAACCCTGAAGCTGAAAGCACTCCAGCAAAACGGCTATGCAACCGAGGCGGCGATCGCTGGCATTGTCACCAACGGCAAAAATAATATGTCTCCTTACAAAGACCGTCTCAACCAGGCTCAGATTCAAGACGTGTCAGCTTATGTACTCGATCGGGCAAAGAAAGGATGGAAGTAG	MIQRLLIIGWSAIVFLISSLTLPALAADLTSGAKLFEVQCAGCHANGGNIVRRGKTLKLKALQQNGYATEAAIAGIVTNGKNNMSPYKDRLNQAQIQDVSAYVLDRAKKGWK	ADLTSGAKLFEVQCAGCHANGGNIVRRGKTLKLKALQQNGYATEAAIAGIVTNGKNNMSPYKDRLNQAQIQDVSAYVLDRAKKGWK
Cytochrome c6BC	Phormidium ambiguum IAM M-71	NIES2119_02930	ATGAAAATTCAAAAATTGTTGTGCTGGTTTAAGAGAACGGGATTGTTTTTAATAATAGTTATTGTCTTCGTTCTCAGTTTTGTAATTGACGCTTGGGCGGCTGATTTGGAAAAAGGGGAAAAAGTATTTCAAGTTAATTGCGTCGGCTGTCATGTGAATGGTGGTAACATAATTCGTCGGGGAAAAAACTTGAAGTTAAAAACTTTGCAGAAAAATGGTTATGGTGATGTAGACGCGATCGCATCTCTAGTCAGCAACGGTAAAGCAAATATGTCAGCCTACAAAGACCGTTTAACCCCAGAACAAATCGAAGATGTCGCAGCTTATGTATTAGCACAAGCTGAAAAAGGCTGGAAGTAA	MKIQKLLCWFKRTGLFLIIVIVFVLSFVIDAWAADLEKGEKVFQVNCVGCHVNGGNIIRRGKNLKLKTLQKNGYGDVDAIASLVSNGKANMSAYKDRLTPEQIEDVAAYVLAQAEKGWK	ADLEKGEKVFQVNCVGCHVNGGNIIRRGKNLKLKTLQKNGYGDVDAIASLVSNGKANMSAYKDRLTPEQIEDVAAYVLAQAEKGWK
Cytochrome c6BC	Planktothricoides sp. SR001	AM228_26490	ATGAAAAAAATCTGCTTCGTTATTTTACTTTGCTTAACCTTAATTAACCTAACCTTTACCGCCCCGGCTTTGGCGATGGATTCTGCCAACGGCGCTCAAATTTTTGCCCAAAATTGTGCCGCTTGTCATGCCAATGGGGGAAATATTATCCGCAGAGGTAAAAATCTGAAAAAGCGGGCATTACAACGACATCAAAAAGATTCGATTGAAGCCATTAGTCTGTTGGTAAAAGAAGGAAAATATGCTATGCCTGCGTATGGAGATCGCCTCTCGGAAGAAGAGATAACAGAGGTAGCGGCTTATGTGTTGGCAAAAGCAGAAAATGACTGGAAATAA	MKKICFVILLCLTLINLTFTAPALAMDSANGAQIFAQNCAACHANGGNIIRRGKNLKKRALQRHQKDSIEAISLLVKEGKYAMPAYGDRLSEEEITEVAAYVLAKAENDWK	MDSANGAQIFAQNCAACHANGGNIIRRGKNLKKRALQRHQKDSIEAISLLVKEGKYAMPAYGDRLSEEEITEVAAYVLAKAENDWK
Cytochrome c6BC	Planktothrix paucivesiculata PCC 9631	PL9631_410066	ATGCTCAACAAATTACTTCTAATATTATTCTTAACCTTAACTTTAGTTCTGGGTTCTGTCCATGCCACGGCCTTAGCTGTTAATATTGATACTGGGGCGAAAATATTTGAAGCGCAATGTGCAGGATGTCATGCTGGGGGAGGAAATATTGTCCGACGGGGAAAAACTTTACAGAAAAAAGCCTTAGAACGTAATCATGTTGATAGTTTAGAAGCAATTTCAAGTTTAGTAACTAATGGTAAAAATAATATGTCTGCGTACAAAGATCGCTTAACAGAAGCCGAAATTCAAGAAGTTTCTGCCTATGTTTTAGAACAGGCCCAAAAGAACTGGAAAAATTAA	MLNKLLLILFLTLTLVLGSVHATALAVNIDTGAKIFEAQCAGCHAGGGNIVRRGKTLQKKALERNHVDSLEAISSLVTNGKNNMSAYKDRLTEAEIQEVSAYVLEQAQKNWKN	VNIDTGAKIFEAQCAGCHAGGGNIVRRGKTLQKKALERNHVDSLEAISSLVTNGKNNMSAYKDRLTEAEIQEVSAYVLEQAQKNWKN
Cytochrome c6BC	Planktothrix tepida PCC 9214	PL9214430039	ATGCTAAAACAATTACTCCTAATATTATTATTAACCTTAACCTTAATTCTAAGTCCTGTTTATTTCCCAGCATTAGCTGTTAATCTGGATACGGGAGCGAAAATATTTGAAGCGCAATGTGTGGGATGTCATGGGGGAGGAGGAAATATTGTCCGACGAGGAAAAACTTTAAAGAAAAAAGCTTTAGAACGCAATCATGTTAATACTTTAGAAGCAATTTCAGCGTTAGTTACTAATGGCAAAAATAATATGTCTGCTTACAAAGATCGTTTAACAGATGCAGAAATTCAAGCGGTTTCTGCTTATGTTTTAGAACAGGCGGAAAAGAATTGGAAAAAATAG	MLKQLLLILLLTLTLILSPVYFPALAVNLDTGAKIFEAQCVGCHGGGGNIVRRGKTLKKKALERNHVNTLEAISALVTNGKNNMSAYKDRLTDAEIQAVSAYVLEQAEKNWKK	VNLDTGAKIFEAQCVGCHGGGGNIVRRGKTLKKKALERNHVNTLEAISALVTNGKNNMSAYKDRLTDAEIQAVSAYVLEQAEKNWKK
Cytochrome c6BC	Pleurocapsa sp. CCALA 161	C7B62_17105	TTGGCTTGGGAGAGTTTTGTTTTGCCAAAGATTATTGCGCTTATTACTTTAATTACTATTATTGCCCTTGGCAGTCCTGCTTTAGCCGATTCTATCTCTACTAACCCAAACAATGGTGCAGCTGTGTTTGAAGCTAACTGTGCTGGCTGCCATGTAAATGGGAGCAACATTGTACGACGGGGTAAAAACTTAAAGTCTAAAGCCCTACACAAAAACAAAGTAGATACCCAAGAAGCGATCGCATCTTTGGTTACTAACGGTAAAGGAATCATGTCAGCTTATGGAGATAAGTTGACTCCCGAACAAATAGCAGATGTCAGTGCTTATGTCTTACAACAGGCTAAACAGGGGTGGAAGTAA	MAWESFVLPKIIALITLITIIALGSPALADSISTNPNNGAAVFEANCAGCHVNGSNIVRRGKNLKSKALHKNKVDTQEAIASLVTNGKGIMSAYGDKLTPEQIADVSAYVLQQAKQGWK	TNPNNGAAVFEANCAGCHVNGSNIVRRGKNLKSKALHKNKVDTQEAIASLVTNGKGIMSAYGDKLTPEQIADVSAYVLQQAKQGWK
Cytochrome c6BC	Prochlorococcus marinus str. MIT 1320	PMIT1320_00291	ATGAACCTACAGATTCGTCTGAGGCGACTTGTACTTGAACTTGGGGGCCAAACTGCAGGATTATTAATCCTGATCTCTACACTCTTGATCCATCCTATTGGCACCATTGCATTGGATACCGATGCTGGAGGATCGTTATTCAAGCAACACTGTTCAGGGTGTCATGTAAATGGTGGCAATATCATTCGACGTAACAAAACCCTTAGGCTCAAAGCACTAGAGCGCAATGGTCTAGATAATCCTCAAGCAATCGCCAGAGTGGCTCGAGAAGGAATCGGGCAAATGTCTGGCTACGAGGATGTTCTCGGCGATAGTGGAGATCAGCTCGTGGCGGGCTGGATATGGGCTCAAGCTCAGAATGCTTGGACCCAAGGGTAA	MNLQIRLRRLVLELGGQTAGLLILISTLLIHPIGTIALDTDAGGSLFKQHCSGCHVNGGNIIRRNKTLRLKALERNGLDNPQAIARVAREGIGQMSGYEDVLGDSGDQLVAGWIWAQAQNAWTQG	LDTDAGGSLFKQHCSGCHVNGGNIIRRNKTLRLKALERNGLDNPQAIARVAREGIGQMSGYEDVLGDSGDQLVAGWIWAQAQNAWTQG
Cytochrome c6BC	Prochlorococcus sp. MIT 1303	PMIT1303_00972	ATGAACCTACAGATTCGTCTGAGGCGATTTGTATTTGAACTTGGGGGCCAAACTGCAGGATTATTAATCCTGATCTCTACACTCTTGATCCATCCTATTGGCACCATTGCATTGGATGCCGATGCTGGAGGATCGTTATTCAAGCAACACTGTTCAGGGTGTCATGTAAATGGTGGCAATATCATTCGACGTAACAAAACCCTTAGGCTCAAAGCACTAGAGCGCAATGGTCTAGATAATCCTCAAGCAATCGCCAGAGTGGCTCGAGAAGGAATCGGGCAAATGTCTGGCTATGAGGATGTTCTCGGCGATAGTGGAGATCAGCTCGTGGCGGCCTGGATATGGGCTCAAGCTCAGAATGCTTGGACCCAAGGGTAA	MNLQIRLRRFVFELGGQTAGLLILISTLLIHPIGTIALDADAGGSLFKQHCSGCHVNGGNIIRRNKTLRLKALERNGLDNPQAIARVAREGIGQMSGYEDVLGDSGDQLVAAWIWAQAQNAWTQG	LDADAGGSLFKQHCSGCHVNGGNIIRRNKTLRLKALERNGLDNPQAIARVAREGIGQMSGYEDVLGDSGDQLVAAWIWAQAQNAWTQG
Cytochrome c6BC	Scytonema hofmannii PCC 7110	WA1_38670	ATGAATATCAAACTTCCAAAGCTCATCACTATTTTATTAGTGATATTCGTGGTTTTAAGTTTCTCTTTCCTTCCTGAAGCAATAGCAGCAGATACAAATAATGGTGCTAAAATTTTTAGCGTAAATTGTGCTGGGTGTCATATCAACGGGAGCAATATTATTAGACGAGGAAAGAACTTAAAATTGAAAGCACTTAAGAAATATGGGATGGATTCTGTAGATGCGATCGCATCTATCGTAACCAACGGGAAAAACAATATGTCAGCCTACAAAGATCGGTTAACCGAGGAAGAAATACAAGATGTCTCTGCTTATGTTTTAGAGCAAGCACAAAAAGACTGGCGATGA	MNIKLPKLITILLVIFVVLSFSFLPEAIAADTNNGAKIFSVNCAGCHINGSNIIRRGKNLKLKALKKYGMDSVDAIASIVTNGKNNMSAYKDRLTEEEIQDVSAYVLEQAQKDWR	ADTNNGAKIFSVNCAGCHINGSNIIRRGKNLKLKALKKYGMDSVDAIASIVTNGKNNMSAYKDRLTEEEIQDVSAYVLEQAQKDWR
Cytochrome c6BC	Scytonema sp. HK-05	NIES2130_00170	ATGCATATAAAATTGAAAAAGCTACTCACAATTATCTTACTGACATTCATTGTCTTAAATCTAAACTTCATTGCCCCAGCATTAGCCGCCGATACAGCTAATGGCGAAAAAATATTTAGCGTTCAATGTGCTGGTTGTCATATTAACGGTAGCAATATTGTTAGGCGAGGCAAGAACTTAAAATTAAAAGCACTCAAAAAATATCAAATGGATTCCATTGAGGCAATTTCCTCGATTGTTGCTAATGGCAAAAGCAACATGTCAGCCTACAAAGACCGCCTGAGCGAACAAGAAATACAAGATGTATCTGCTTATGTTTTAGAGCAAGCTCAAAAAGGCTGGCGTTAG	MHIKLKKLLTIILLTFIVLNLNFIAPALAADTANGEKIFSVQCAGCHINGSNIVRRGKNLKLKALKKYQMDSIEAISSIVANGKSNMSAYKDRLSEQEIQDVSAYVLEQAQKGWR	ADTANGEKIFSVQCAGCHINGSNIVRRGKNLKLKALKKYQMDSIEAISSIVANGKSNMSAYKDRLSEQEIQDVSAYVLEQAQKGWR
Cytochrome c6BC	Sphaerospermopsis reniformis	SR1949_24380	ATGAAAAAACTCATAACTTTGATTTTGTTGACTTTCTGTTTGTGGATAATCAATTTTCCCTTACCAGCTAACGCTTTAGATACCCAAAATGGGGCGGAAGTTTTTAGCGTTCATTGTGTTGGATGTCATATCAATGGTGGTAATATTATTAGAAGAGGCAAGAACTTAAAAAAGAATGCTTTGAAAAGATATGGTATGGATTCTTTAGAGGCGATTACAAATATCATCACTAATGGTAAAAGTAATATGTCAGCCTATAAAGAAAAGTTGACAACGGAAGAAATGAAAAATGTCGCGGCTTATGTTTTGGAACAAGCAGAAAACAACTGGAAATAA	MKKLITLILLTFCLWIINFPLPANALDTQNGAEVFSVHCVGCHINGGNIIRRGKNLKKNALKRYGMDSLEAITNIITNGKSNMSAYKEKLTTEEMKNVAAYVLEQAENNWK	LDTQNGAEVFSVHCVGCHINGGNIIRRGKNLKKNALKRYGMDSLEAITNIITNGKSNMSAYKEKLTTEEMKNVAAYVLEQAENNWK
Cytochrome c6BC	Stanieria cyanosphaera PCC 7437	Sta7437_2312	ATGATGAAAAAAATAATTAGTATTGCTTTAATTTTGCTATTATGTTCAGTTTTATTCTTTTCCAATTCGGTTTCTGCATCAGATTTAGATACAGGAGCCAAAATCTTTGAAGTCAATTGTGCTGGTTGCCATATCCACGGTGGCAATATCGTTCGTAGGGGAAAAAATTTAAAACAGAAAACATTGCAGAAAAATAAACTAGATTCAACAGAAGCGATCGCAACTTTAGTAACTCATGGTAAAAATAATATGCCAGCTTATCAAGACCGTCTTGAGTTAGCAGAAATAGAAGCAGTAGCAAATTATGTTCTTCAACAAGCCCAAGCAGATTGGAAATAA	MMKKIISIALILLLCSVLFFSNSVSASDLDTGAKIFEVNCAGCHIHGGNIVRRGKNLKQKTLQKNKLDSTEAIATLVTHGKNNMPAYQDRLELAEIEAVANYVLQQAQADWK	SDLDTGAKIFEVNCAGCHIHGGNIVRRGKNLKQKTLQKNKLDSTEAIATLVTHGKNNMPAYQDRLELAEIEAVANYVLQQAQADWK
Cytochrome c6BC	Stanieria sp. NIES-3757	STA3757_25600	GTGGACGAACAATCGACCATTAACAAAGAACTTATGAATTTAAGAAGTATGAATGTAAAGAAAATTGTAATTATTGGGATGATTATTTCAATTTATTGGTTAATTTACCCTCATCATTCCGTTTTTGCCTCAGATTTAGATACAGGAGCTAAGATTTTTGAAGTTAATTGTGCTGGTTGTCATCTTCACGGTGGCAATATTGTCCGTAGGGGGAAAAATTTAAAACAGAAGACATTACAAAAAAATAAACTAGATTCAGTAGAAGCGATCGCTTCGCTAGTCACTCATGGTAAAAATAATATGCCAGCCTATCAAGACCGTCTTGAGTTAGCAGAAATAGAAGCAGTAGCAAATTATGTTCTTCAACAAGCTCAAGCTGGCTGGAAATAA	MDEQSTINKELMNLRSMNVKKIVIIGMIISIYWLIYPHHSVFASDLDTGAKIFEVNCAGCHLHGGNIVRRGKNLKQKTLQKNKLDSVEAIASLVTHGKNNMPAYQDRLELAEIEAVANYVLQQAQAGWK	SDLDTGAKIFEVNCAGCHLHGGNIVRRGKNLKQKTLQKNKLDSVEAIASLVTHGKNNMPAYQDRLELAEIEAVANYVLQQAQAGWK
Cytochrome c6BC	Stenomitos frigidus ULC18	C7B82_07310	ATGAAAAAATTACGAACCGTTTTTGCATTGTTGCTCAGTATTGCTCTCTTTCAAGCACTTGTGTTTACGTTGCCATTTCCTAGTTCGCCTGCAATGGCCACCGATTCTCTAAGTGGAGCAAAAGTGTTTAAGAACAACTGCGCCATGTGCCACGTTGGGGGTAAAAACGTCGTAATGCCAGATAAAGCCTTAAACCAAGCTGCCCTTGATAAGTACGGTAAGAATTCGGTAGTAGCCATTACGGCTCAGATCAAGGCTGGAATGAATGCCATGCCAGCCTTTAAGGAAAAGCTAACCGACGCCCAAATCGAAGACGTTGCCGCCTACGTACTCGACCAAGCTAAGAACGGTTGGCAATAA	MKKLRTVFALLLSIALFQALVFTLPFPSSPAMATDSLSGAKVFKNNCAMCHVGGKNVVMPDKALNQAALDKYGKNSVVAITAQIKAGMNAMPAFKEKLTDAQIEDVAAYVLDQAKNGWQ	TDSLSGAKVFKNNCAMCHVGGKNVVMPDKALNQAALDKYGKNSVVAITAQIKAGMNAMPAFKEKLTDAQIEDVAAYVLDQAKNGWQ
Cytochrome c6BC	Synechococcus elongatus PCC 11801	DOP62_03915	ATGAACCGCTTGTTGCGATCGCTCTTCACGGCTCTCTGCCTGCTGCTCTGTGGGCTGACTATCGCCCCAATTCCCACTCAGGCTGCACCGGCAACTGGAGCAGCGCTGTTTGAGGCGCAGTGCGTCGGTTGCCACATTGGCGGCGGCAATATTATTCGCCGGGGCAAAACCCTACAACTCAAAGCCTTGCAAAAAAATGGTTACGACACTGCTGAAGCGATCGCGACGATTGTCAGCCAAGGCAAAAACAACATGTCCGCCTACAGCGATCGCCTCAGCCCCGAGGAAATTGCAGCAGTGTCAGCCTATGTGCTGGAACAAGCCAACGCGGGCTGGCCTCGGTCATAA	MNRLLRSLFTALCLLLCGLTIAPIPTQAAPATGAALFEAQCVGCHIGGGNIIRRGKTLQLKALQKNGYDTAEAIATIVSQGKNNMSAYSDRLSPEEIAAVSAYVLEQANAGWPRS	AAPATGAALFEAQCVGCHIGGGNIIRRGKTLQLKALQKNGYDTAEAIATIVSQGKNNMSAYSDRLSPEEIAAVSAYVLEQANAGWPRS
Cytochrome c6BC	Synechococcus elongatus PCC 6301	syc1568_d	ATGAACCGTCTGTTGCGATCGCTCCTCATGGCTTTTTGCCTGCTGATTTGTGGGCTGACTATCGCTCCAATTTCCACTCAGGCTGCACCGGCAACTGGAGCAGCGCTCTTCGAGGCACAGTGCGTTGGTTGCCATATTGGCGGCGGCAATATTATTCGCCGGGGCAAAACCCTACAACTCAAAGCCCTGAAAAAAAATGGTTACGACACTGCTGAAGCGATCGCGACGATCGTCAGCCAGGGCAAAAACAACATGTCCGCCTACAGCGATCGCCTCAGCCCCGAGGAAATTGCGATCGTTTCCGCCTATGTGCTGGAACAAGCCAACGCGGGCTGGCCTCGGTCATAA	MNRLLRSLLMAFCLLICGLTIAPISTQAAPATGAALFEAQCVGCHIGGGNIIRRGKTLQLKALKKNGYDTAEAIATIVSQGKNNMSAYSDRLSPEEIAIVSAYVLEQANAGWPRS	AAPATGAALFEAQCVGCHIGGGNIIRRGKTLQLKALKKNGYDTAEAIATIVSQGKNNMSAYSDRLSPEEIAIVSAYVLEQANAGWPRS
Cytochrome c6BC	Synechococcus elongatus PCC 7942 = FACHB-805	Synpcc7942_2542	ATGAACCGTCTGTTGCGATCGCTCCTCATGGCTTTTTGCCTGCTGATTTGTGGGCTGACTATCGCTCCAATTTCCACTCAGGCTGCACCGGCAACTGGAGCAGCGCTCTTCGAGGCACAGTGCGTTGGTTGCCATATTGGCGGCGGCAATATTATTCGCCGGGGCAAAACCCTACAACTCAAAGCCCTGAAAAAAAATGGTTACGACACTGCTGAAGCGATCGCGACGATCGTCAGCCAGGGCAAAAACAACATGTCCGCCTACAGCGATCGCCTCAGCCCCGAGGAAATTGCGATCGTTTCCGCCTATGTGCTGGAACAAGCCAACGCGGGCTGGCCTCGGTCATAA	MNRLLRSLLMAFCLLICGLTIAPISTQAAPATGAALFEAQCVGCHIGGGNIIRRGKTLQLKALKKNGYDTAEAIATIVSQGKNNMSAYSDRLSPEEIAIVSAYVLEQANAGWPRS	AAPATGAALFEAQCVGCHIGGGNIIRRGKTLQLKALKKNGYDTAEAIATIVSQGKNNMSAYSDRLSPEEIAIVSAYVLEQANAGWPRS
Cytochrome c6BC	Synechococcus lacustris	C7K08_07760	CTGGTGAACAAATTTTTTTCTTTCCTGCTGAGCTTTCTGCTTCTAATTGCCCCCACCGCCAGCTCCGGCGAGCAATTATTTAACCAATATTGCATCGGCTGCCACATTAATGGTGGCAACATCATTCGCCGCGCTAAAACATTAAAACTGGCAGCATTGCAAAAGAACGGCATTTTGGATGCAACTGCCATAAGCGCCATTGCAACCCAAGGCAAGGGTTCAATGGGTGCCTATGGAGCCCTTCTCGGCCCTGATGGCGCCGATGCTGTGGGCGAATGGGTTTGGCAACAGGCTCTCACTAACTGGCCTTCATAG	MVNKFFSFLLSFLLLIAPTASSGEQLFNQYCIGCHINGGNIIRRAKTLKLAALQKNGILDATAISAIATQGKGSMGAYGALLGPDGADAVGEWVWQQALTNWPS	PTASSGEQLFNQYCIGCHINGGNIIRRAKTLKLAALQKNGILDATAISAIATQGKGSMGAYGALLGPDGADAVGEWVWQQALTNWPS
Cytochrome c6BC	Synechococcus sp. A15-127	SynA15127_01081	TTGAACATTCAACCCAGGATTCATCCCATCGCCAGCAGCCTGAGAAGGACCCTTACCTGTCTGCTGGTGGCGATCCTGGTCATCAGCCTCAGCCCCAACAGCGCCCTTGCCGAAGACATCAGCGGCAGGGGCGCTGTTCTGTTTGAGCAGCACTGCGCCGCCTGCCACATCCATGGAGGCAACATCATCCGGCGGGGCAAAACTCTGCGGATGAACGCTCTGGAGAAACGAGGGATCGCCTCACCGGAAGCGATCGCCGCGATTGCACGCGAGGGGATCGGGCAGATGAGTGGATATGAGCAGGTGCTCGGAACAGGCGGAGATGTTGCCGTGGCGGACTGGATCTGGGAGCAGGCTCAGAACGCCTGGATCCAGGGATAG	MNIQPRIHPIASSLRRTLTCLLVAILVISLSPNSALAEDISGRGAVLFEQHCAACHIHGGNIIRRGKTLRMNALEKRGIASPEAIAAIAREGIGQMSGYEQVLGTGGDVAVADWIWEQAQNAWIQG	DISGRGAVLFEQHCAACHIHGGNIIRRGKTLRMNALEKRGIASPEAIAAIAREGIGQMSGYEQVLGTGGDVAVADWIWEQAQNAWIQG
Cytochrome c6BC	Synechococcus sp. A15-24	SynA1524_01655	GTGAGCCGATTGATCGCCACCGCTGCAGCGGTCCTGATCCTGTTCACATCATTCACAACCAGCGCTCTTGCCGGTGAGACCTCCGGAGAGGGCGCTGTTTTGTTTGGCCAGCACTGTGCAGGCTGTCATATGAATGGCGGCAACATCATTCGGCGCGGCAAAAATCTCAAGCTGGCCACCTTGCAACGCCAAGGCCTGGATTCAACAGAAGCGATTGCACGCATTGCCCGGAACGGCATTGGCCAGATGAGCGGCTATGGCGACAAGCTCGGTGAAGGCGGTGACCAACTGGTGGCAAGCTGGATTCTTGAACAGGCTCAGAATGCCTGGATCCAGGGATAG	MSRLIATAAAVLILFTSFTTSALAGETSGEGAVLFGQHCAGCHMNGGNIIRRGKNLKLATLQRQGLDSTEAIARIARNGIGQMSGYGDKLGEGGDQLVASWILEQAQNAWIQG	ETSGEGAVLFGQHCAGCHMNGGNIIRRGKNLKLATLQRQGLDSTEAIARIARNGIGQMSGYGDKLGEGGDQLVASWILEQAQNAWIQG
Cytochrome c6BC	Synechococcus sp. A15-60	SynA1560_01223	ATGCTCTCGTTGATCATGTCGGTGATGCTGGCGTTGGCACTGCTTTGGCCTACTGAGACCCTTGCGCTTCCCCCATCAGGTGCAGACCTCTTCGATCTCCACTGTGCGGGGTGCCACCCCAATGGCGGAAACATTATCCGTCGGGGAAAGACGTTGAAACTGAAGGCCCTGGAGAAACAAGGCATCAACAATGCGGAGGCAATCGCTGCGATCGCCCGCGCAGGCATCGGTCAAATGAGCGGTTATGCCGAGGCTCTCGGTGAAGGCAATGAAGTCATCGTCGCCGATTGGATCTGGGAACAAGCTCAAAATGCCTGGATCCAGGGATAA	MLSLIMSVMLALALLWPTETLALPPSGADLFDLHCAGCHPNGGNIIRRGKTLKLKALEKQGINNAEAIAAIARAGIGQMSGYAEALGEGNEVIVADWIWEQAQNAWIQG	ALPPSGADLFDLHCAGCHPNGGNIIRRGKTLKLKALEKQGINNAEAIAAIARAGIGQMSGYAEALGEGNEVIVADWIWEQAQNAWIQG
Cytochrome c6BC	Synechococcus sp. A15-62	SynA1562_01006	GTGCTGAGCTCCATCCTTCGCTGCTGCATTGGTGCGTTTCTTGTGCTGCTGCTGAGCCTTGGATCAGGCGGTGCATCGCTGGCCGCCGGACCGGATGCCAGCACCGGCGCCCTGTTGTTCGAACAGCACTGCGCCGGATGCCACATCAACGGCGGCAACATCATTCGCCGAGGGAAAAACTTGAAGCTGAAGACCCTCGAGCGTGAGCAGATCGCAACGGTGGACGCCATCGCAGCCATTGCCCGTGAAGGTCGAGGCCAGATGAGTGGTTACGCCGACGTTCTCGGGAGCGAGGGAGATCAGCTTGTGGCGGAATGGGTGCTCATGCAGGCTCAGAACGCCTGGACCCAGGGATAA	MLSSILRCCIGAFLVLLLSLGSGGASLAAGPDASTGALLFEQHCAGCHINGGNIIRRGKNLKLKTLEREQIATVDAIAAIAREGRGQMSGYADVLGSEGDQLVAEWVLMQAQNAWTQG	PDASTGALLFEQHCAGCHINGGNIIRRGKNLKLKTLEREQIATVDAIAAIAREGRGQMSGYADVLGSEGDQLVAEWVLMQAQNAWTQG
Cytochrome c6BC	Synechococcus sp. A18-40	SynA1840_01650	TTGGTGAACCGATTGATCGCCACCGCTGCAGCGGTTCTGATCCTGTTCACATCATTCACAACCAGCGCTCTTGCCGGTGAGACCTCCGGCGAGGGCGCTGTTTTGTTTGGCCAGCACTGTGCAGGCTGTCACGTGAATGGCGGCAACATCATTCGCCGCGGCAAAAATCTCAAGTTGGCCACGTTGAAACGCCAAGGCCTGGATTCAACAGAAGCGATTGCAAGCATTGCCCGGAACGGCATTGGCCAGATGAGCGGCTATGGCGACAAGCTCGGAGAAGGAGGTGATCAACTGGTGGCAGGCTGGATTCTTGAGCAGGCTCAGAATGCCTGGACCCAGGGATAG	MVNRLIATAAAVLILFTSFTTSALAGETSGEGAVLFGQHCAGCHVNGGNIIRRGKNLKLATLKRQGLDSTEAIASIARNGIGQMSGYGDKLGEGGDQLVAGWILEQAQNAWTQG	ETSGEGAVLFGQHCAGCHVNGGNIIRRGKNLKLATLKRQGLDSTEAIASIARNGIGQMSGYGDKLGEGGDQLVAGWILEQAQNAWTQG
Cytochrome c6BC	Synechococcus sp. A18-46.1	SynA18461_01743	GTGAACCGATTGATCGCCACCGCTGCAGCGGTTCTGATCCTGTTCACATCATTCACAACCAGCGCTCTTGCCGGTGAGACCTCCGGCGAGGGCGCTGTTTTGTTTGGCCAGCACTGTGCAGGCTGTCACGTGAATGGCGGCAACATCATTCGCCGCGGCAAAAATCTCAAGTTGGCCACGTTGAAACGCCAAGGCCTGGATTCAACAGAAGCGATTGCAAGCATTGCCCGGAAAGGCATTGGCCAGATGAGCGGCTATGGCGACAAGCTCGGAGAAGGAGGTGATCAACTGGTGGCAGGCTGGATTCTTGAGCAGGCTCAGAATGCCTGGACCCAGGGATAG	MNRLIATAAAVLILFTSFTTSALAGETSGEGAVLFGQHCAGCHVNGGNIIRRGKNLKLATLKRQGLDSTEAIASIARKGIGQMSGYGDKLGEGGDQLVAGWILEQAQNAWTQG	ETSGEGAVLFGQHCAGCHVNGGNIIRRGKNLKLATLKRQGLDSTEAIASIARKGIGQMSGYGDKLGEGGDQLVAGWILEQAQNAWTQG
Cytochrome c6BC	Synechococcus sp. Ace-Pa	FB106_RS12325	CTGGTCTGGGCGGCCGTGCTGGGACTGTCGCTGCTGATCAGTTGGCCTCGAGCGGCCTATGGCGCCACCACAAAGTCCTTGGCTGGTTCGTTATTTGAGGCCCACTGCGCCGGCTGTCATGTCAATGGCGGTAACATCCTGCGCCGCGGCAAAACGCTGAAGTTGGCGGCGCTGGAGCGCAACGGCGTTGGCGGGCCCGAGGCCATTGCCGCGATTGCTGCCGGAGGAATCGGCCAGATGGGCGGCTATGGAGCCGTCCTCGGCGAGGGTGGAGCGGAGCTTGTCGGCGATTGGGTGTGGCAGCAGGCCCTGAACAACTGGGCCGCCGAGAGCCCAAAGGCTTAA	MVWAAVLGLSLLISWPRAAYGATTKSLAGSLFEAHCAGCHVNGGNILRRGKTLKLAALERNGVGGPEAIAAIAAGGIGQMGGYGAVLGEGGAELVGDWVWQQALNNWAAESPKA	TTKSLAGSLFEAHCAGCHVNGGNILRRGKTLKLAALERNGVGGPEAIAAIAAGGIGQMGGYGAVLGEGGAELVGDWVWQQALNNWAAESPKA
Cytochrome c6BC	Synechococcus sp. BIOS-E4-1	SynBIOSE41_03159	ATGAAGACGCTTCTGGCAGGGGTACTGATGCTGATCACACTGTTCTGGCAGAGTTCAAGCGCCTGGAGCCTGAGCGGATCAGGAGCGCAACTGTTTGATCTGCATTGCGCTGGATGTCACCCCAACGGTGGCAACATCATTCGTCGAGGACGGACATTGAAACTCAAGGCACTCGAGAAACGAGAGCTCAACAATGCGCAAGCGATCGCGCAGATTGCCCGCGATGGAATCGGTCAAATGAGCGGTTATGCCGATGCACTCGGAGCAGGGAATGACATCGTGGTTGCCGACTGGATCTGGCAGCAGGCTCAGAATGCCTGGATCCAGGGATAA	MKTLLAGVLMLITLFWQSSSAWSLSGSGAQLFDLHCAGCHPNGGNIIRRGRTLKLKALEKRELNNAQAIAQIARDGIGQMSGYADALGAGNDIVVADWIWQQAQNAWIQG	SLSGSGAQLFDLHCAGCHPNGGNIIRRGRTLKLKALEKRELNNAQAIAQIARDGIGQMSGYADALGAGNDIVVADWIWQQAQNAWIQG
Cytochrome c6BC	Synechococcus sp. BIOS-U3-1	SynBIOSU31_02359	ATGAGAACTCTGCTGGCAGGTGCACTGATGCTGCTAACACTGTTCTGGCAGAGTTCCAGCGTCTGGGGCTTGAGTGGATCAGGAGCGCAGCTGTTTGATCTGCATTGCGCTGGATGTCATCCCAATGGCGGAAACATCATTCGTCGAGGACGAACACTAAAACTTACGGCCCTCGAGAAACGAGAGCTCAACAATGCTCAAGCGATTGCACAGATTGCCCGTGAAGGCATTGGCCAAATGAGCGGTTATGCCGATGCTCTCGGAGAAGGGAATGACATCGTGGTTGCCGAATGGATCTGGCAGCAGGCTCAGAATGCCTGGACCCATGGATAA	MRTLLAGALMLLTLFWQSSSVWGLSGSGAQLFDLHCAGCHPNGGNIIRRGRTLKLTALEKRELNNAQAIAQIAREGIGQMSGYADALGEGNDIVVAEWIWQQAQNAWTHG	GLSGSGAQLFDLHCAGCHPNGGNIIRRGRTLKLTALEKRELNNAQAIAQIAREGIGQMSGYADALGEGNDIVVAEWIWQQAQNAWTHG
Cytochrome c6BC	Synechococcus sp. BL107	BL107_14485	GTGAATCGATTGATCCAAGGAGTGTTGACCGCTCTCTTGATGCTGCTGATGGCGCCAGGGATCGGAGAGGCTGCAGCATCCAACGAGGGAGCAGCACTGTTTCAGCAGCATTGTGCTGCTTGCCATATCAATGGTGGCAACATCATTCGTCGGGGCAAAACACTCAAGCTGAAGGCATTAGAGCGTCAAGGAATTGCATCTGTAGACGCAATTGCTCAAATTGCTAGGGAAGGCGTCGGGCAGATGAGCGGCTACGGCGATGTTCTTGGTCCTGGTGGTGATCAACTTGTTGCTGAATGGATTTGGGATCAGGCTCAAAATGCTTGGATCCAGGGATAA	MNRLIQGVLTALLMLLMAPGIGEAAASNEGAALFQQHCAACHINGGNIIRRGKTLKLKALERQGIASVDAIAQIAREGVGQMSGYGDVLGPGGDQLVAEWIWDQAQNAWIQG	AASNEGAALFQQHCAACHINGGNIIRRGKTLKLKALERQGIASVDAIAQIAREGVGQMSGYGDVLGPGGDQLVAEWIWDQAQNAWIQG
Cytochrome c6BC	Synechococcus sp. BMK-MC-1	SynBMKMC1_00873	ATGCGAGCACTGTTGATTGTCGCTGGTCTGCTCATCGCGCTTGCCTTGCCCGTCGAAAGCGTCGGCGCCCTCTCGAGCGATGGCGCCCAGCTGTTTGATCTTCACTGTGCTGGTTGTCACCCCAACGGCGGGAACATCATTCGCCGCGGCCGTTCACTGAAATTGAAGGATCTTTCCAAACGAGGCCTGGACAATCCAGAAGCAATTGCAGCGATCGCCAAGGAGGGAATCGGCCAGATGAGTGGTTATGGCGATGCCCTCGGCGAGGGAAACGAGCAGGTTGTTGGCGATTGGGTATGGCTTCAGGCTCAAAACGCCTGGATCCAGGGATAA	MRALLIVAGLLIALALPVESVGALSSDGAQLFDLHCAGCHPNGGNIIRRGRSLKLKDLSKRGLDNPEAIAAIAKEGIGQMSGYGDALGEGNEQVVGDWVWLQAQNAWIQG	ALSSDGAQLFDLHCAGCHPNGGNIIRRGRSLKLKDLSKRGLDNPEAIAAIAKEGIGQMSGYGDALGEGNEQVVGDWVWLQAQNAWIQG
Cytochrome c6BC	Synechococcus sp. BS55D	CWE16_03695	ATGAAGCTTCTGCGCTGGATCGCTGGTTTCTGCATCGCAGCCACCCTCAGCCTGGCCCCGTTCTCCATCAGCGCTCAGGCCGCAGATGGGGAGCAACTGTTTGACCTCCATTGCGCCGGATGCCATCCCCATGGGGGCAACATCATTCGTCGGGGACGCACGCTCCAACTCTCTGCACTCGAGAAGCGAGGACTCGACAACCAAGAGGCGATCGCCAGGGTGGCCCGAGAAGGCATCGGCCAGATGTCTGGCTATGGCGAAGTGCTCGCGGAAAACGGAGACATCGCAGTAGCCGCCTGGGTCTGGGACCAAGCTCAAAAGGCCTGGATCCAAGGGTAA	MKLLRWIAGFCIAATLSLAPFSISAQAADGEQLFDLHCAGCHPHGGNIIRRGRTLQLSALEKRGLDNQEAIARVAREGIGQMSGYGEVLAENGDIAVAAWVWDQAQKAWIQG	AQAADGEQLFDLHCAGCHPHGGNIIRRGRTLQLSALEKRGLDNQEAIARVAREGIGQMSGYGEVLAENGDIAVAAWVWDQAQKAWIQG
Cytochrome c6BC	Synechococcus sp. BSA11S	FPZ61_05225	ATGTCCGCGATTCCCACCTCAGCTTGGTCCGTCAAGGCCTGGCGCCGGCTGCTGGGGTTCCTGGCGCTGCTCGCTCTGGTGCTGCTGATCTGGTGGCCGCGGCCCGTGTGGGGTGAATCCCTGGCAACCGCCAGCGGCCCTTCGGGGGAGAGCCTGTTCGCGAACCATTGCGCCGGATGCCACGTCAACGGCGGAAACATTCTTCGCCGCAGCAAGACCCTCAGGCTCAGAGCCCTGGAGCGCAACGGCATCACAGGTCCCGAGGCCATCGCCACCATCGCGGCCGGCGGACTTGGACAGATGTCCGGCTACGGGGAGGCTCTGGGGCTGGGGGGGCCTGAGGCGGTGGCGGACTGGGTGTGGCAGCAGGCCCAGCAGAACTGGGTAGGAACAGCAGAA…	MSAIPTSAWSVKAWRRLLGFLALLALVLLIWWPRPVWGESLATASGPSGESLFANHCAGCHVNGGNILRRSKTLRLRALERNGITGPEAIATIAAGGLGQMSGYGEALGLGGPEAVADWVWQQAQQNWVGTAEPAT	ASGPSGESLFANHCAGCHVNGGNILRRSKTLRLRALERNGITGPEAIATIAAGGLGQMSGYGEALGLGGPEAVADWVWQQAQQNWVGTAEPAT
Cytochrome c6BC	Synechococcus sp. CC9311	sync_1908	ATGATTCCACTCCTCTCATCAGTTCTGCTTGCCTTGATGCTGTTTTTGCCATCCACTGCACTTGCAGTTGAGACAGGAGCCTCATTATTTCAAAACAATTGCGCTAGCTGCCACCCCAATGGCGAAAACATTATTCGTCGAGGGCGCACACTCAAGATGAAAGCATTGACAAAACGTGGACTCGATAGCAGCGAGGCCATCGCACAAGTTGCCCGAGAAGGAATCGGACAAATGAGTGGTTACGCCGATGCACTTGGTGAAGATGGAGATGTGTTTGTAGCCGAATGGGTTTGGCAACAAGCTCAAAAGGCTTGGACCCAGGGATAA	MIPLLSSVLLALMLFLPSTALAVETGASLFQNNCASCHPNGENIIRRGRTLKMKALTKRGLDSSEAIAQVAREGIGQMSGYADALGEDGDVFVAEWVWQQAQKAWTQG	LAVETGASLFQNNCASCHPNGENIIRRGRTLKMKALTKRGLDSSEAIAQVAREGIGQMSGYADALGEDGDVFVAEWVWQQAQKAWTQG
Cytochrome c6BC	Synechococcus sp. CC9605	Syncc9605_0993	GTGCTGCTGCTGAGCCTTGGATCAGGCGGTGCTTCGCTGGCCGCCGGGCGGGATGCCAGCACCGGCGCTCTGTTGTTCGAACAGCACTGCGCCGGATGCCACATCAACGGCGGCAACATCATTCGCCGAGGGAAAAACCTGAAGCTGAAGACCCTCGAGCGTGAGCAGATCGCAACGGTGGACGCCATCGCAGCCATCGCCCGGGAAGGCCGAGGCCAGATGAGTGGTTACGCCGACGTTCTCGGGAGCGAGGGAGATCAGCTTGTGGCGGAATGGGTGCTCATGCAGGCTCAGAACGCCTGGACCCAGGGATAA	MLLLSLGSGGASLAAGRDASTGALLFEQHCAGCHINGGNIIRRGKNLKLKTLEREQIATVDAIAAIAREGRGQMSGYADVLGSEGDQLVAEWVLMQAQNAWTQG	RDASTGALLFEQHCAGCHINGGNIIRRGKNLKLKTLEREQIATVDAIAAIAREGRGQMSGYADVLGSEGDQLVAEWVLMQAQNAWTQG
Cytochrome c6BC	Synechococcus sp. CC9902	Syncc9902_0899	GTGAAAAGGTTGATCCAAGGAGTGTTGACCGCTCTATTGATGCTGCTGATGGCGCCAGGGCTCGGACAGGCTGCAGCATCGAGCGAAGGAGCAGCACTTTTTCAGCAGCATTGTGCTGCTTGCCATATCAATGGCGGCAACATCATTCGTCGAGGCAAAACACTCAAGCTGAAGGCATTAGAGCGTCAAGGGATTGCGTCAATGGACGCAATCGCTCAAATTGCTAGGGAAGGCGTCGGCCAGATGAGCGGCTACGGCGATGTTCTTGGTCCTGGTGGGGATCAACTCGTTGCGGAATGGATTTGGGAGCAGGCTCAAAATGCTTGGATCCAGGGGTAA	MKRLIQGVLTALLMLLMAPGLGQAAASSEGAALFQQHCAACHINGGNIIRRGKTLKLKALERQGIASMDAIAQIAREGVGQMSGYGDVLGPGGDQLVAEWIWEQAQNAWIQG	AASSEGAALFQQHCAACHINGGNIIRRGKTLKLKALERQGIASMDAIAQIAREGVGQMSGYGDVLGPGGDQLVAEWIWEQAQNAWIQG
Cytochrome c6BC	Synechococcus sp. HB1133	ETE01_04330	CTGCTGCTGCTGAACCTTGGAGCAGCTGAAGCCACAGCCGCTGCTGTTCCACAGATCAGCGATGGAGCTGTGTCATTCGAACAGCACTGCGCGGGATGCCACATCAACGGCGGCAACATCATTCGCCGTGGAAAAAACCTGAAGCTGAAGACCCTCGAGCGTGATGAGATCGCAACGGTGGAAGCCATCGCAGCCATCGCCCGTGAAGGGCGAGGCCAGATGAGCGGTTACGCAGATGTTCTCGGGCCGGATGGTGATCAGCTTGTGGCGGAATGGATCCTGATGCAGGCTCAGAACGCCTGGACCCAGGGATAA	MLLLNLGAAEATAAAVPQISDGAVSFEQHCAGCHINGGNIIRRGKNLKLKTLERDEIATVEAIAAIAREGRGQMSGYADVLGPDGDQLVAEWILMQAQNAWTQG	PQISDGAVSFEQHCAGCHINGGNIIRRGKNLKLKTLERDEIATVEAIAAIAREGRGQMSGYADVLGPDGDQLVAEWILMQAQNAWTQG
Cytochrome c6BC	Synechococcus sp. KORDI-52	KR52_12070	GTGCTGAGCAACATCCTGAGCTGCTCCTTTGGTGCGTTTCTTGGTCTGCTGCTGAGCCTTGGCACTGCCGGGGCTTCGCTTGCTGCTGAGTCGCACACCAGTTCAGGCGCCCTGTTGTTCGAACACCACTGCGCAGGATGCCACATCAACGGCGGCAACATCATTCGCCGGGGGAAAAACCTGAAGTTGAAGACCCTCGAGCGTGATGACATCGCAACGGTGACGGCCATCGCAGCCATCGCCCGAGAGGGGCAAGGCCAGATGAGCGGTTACGCCGGCGTTCTGGGAACAGATGGAGATCAACTCGTGGCTGAATGGGTCCTGATGCAGGCTCAGAACGCCTGGACCCAGGGATAA	MLSNILSCSFGAFLGLLLSLGTAGASLAAESHTSSGALLFEHHCAGCHINGGNIIRRGKNLKLKTLERDDIATVTAIAAIAREGQGQMSGYAGVLGTDGDQLVAEWVLMQAQNAWTQG	SHTSSGALLFEHHCAGCHINGGNIIRRGKNLKLKTLERDDIATVTAIAAIAREGQGQMSGYAGVLGTDGDQLVAEWVLMQAQNAWTQG
Cytochrome c6BC	Synechococcus sp. MEDNS5	SynMEDNS5_00789	ATGCGAGCACTATTGATTGTCGCCGGATTATTGATCGCTCTTGTTTTGCCGGCACAGAGGGTCAGCGCCCTATCCACAGATGGCGCCCAGCTGTTTGATCTCCACTGCGCTGGATGTCATCCCAACGGTGGCAACATCATTCGCCGCGGCCGATCATTGAAATTGAAGGATCTATCGAAACGAGGCCTGGACAATCCAGAAGCGATTGCAACGATCGCCAGAGAGGGAATCGGCCAGATGAGCGGTTATGGCGATGCCCTCGGCGAGGGAAACGAGATCGTCGTGGGTGATTGGGTCTGGCTTCAAGCTCAGAACGCCTGGACCCAGGGATAA	MRALLIVAGLLIALVLPAQRVSALSTDGAQLFDLHCAGCHPNGGNIIRRGRSLKLKDLSKRGLDNPEAIATIAREGIGQMSGYGDALGEGNEIVVGDWVWLQAQNAWTQG	ALSTDGAQLFDLHCAGCHPNGGNIIRRGRSLKLKDLSKRGLDNPEAIATIAREGIGQMSGYGDALGEGNEIVVGDWVWLQAQNAWTQG
Cytochrome c6BC	Synechococcus sp. Minos11	SynMINOS11_01729	ATGAAGTGGCTTGTTGGCTTGCTGCTGATGCTTGGGCTCTGGATGGCTCCAGCGCCAGTCCATGCCGCTGCAGATGGCGCTGCCCTGTTTGAAGCCCATTGCGTGGGTTGCCACCTCAACGGCGGCAACATCATTCGCCGCGGCAAAACGCTGAAGCTCAAAGCCCTCGAGCGCAATGGAATTGAAGGCCCACTAGAGATCGCGATGATCGCGACGGAAGGGCGCGGTCAAATGAGTGGCTATGGCGAAGTGCTTGGCGAGCAAGGCGCTGATGCTGTAGCCGAGTGGATCTGGCAGCAAGCGCAAGAGGGCTGGTCCTAG	MKWLVGLLLMLGLWMAPAPVHAAADGAALFEAHCVGCHLNGGNIIRRGKTLKLKALERNGIEGPLEIAMIATEGRGQMSGYGEVLGEQGADAVAEWIWQQAQEGWS	HAAADGAALFEAHCVGCHLNGGNIIRRGKTLKLKALERNGIEGPLEIAMIATEGRGQMSGYGEVLGEQGADAVAEWIWQQAQEGWS
Cytochrome c6BC	Synechococcus sp. MIT S9220	SynMITS9220_02132	ATGAGAACTCTGCTGGCAGGGGCCCTGATGCTGATCGCACTGCTTTGGCAGAGTTCAAGCGCCTGGGGCCTAAGTGGATCAGGAGCGCAACTCTTTGATCTGCATTGCGCTGGATGTCATCCCAACGGTGGCAACATCATTCGTCGAGGACGAACACTAAAGCTCAAGGCTCTCGAAAAACGAGAGCTCAACAATGCTCAAGCGATCGCGCAGATTGCCCGTGAAGGGATTGGCCAAATGAGCGGTTATGCCGATGTTCTAGGAGAAGGGAATGACGTCGTGGTTGCCGACTGGATCTGGCAGCAGGCTCAGAATGCCTGGATCCAGGGATAA	MRTLLAGALMLIALLWQSSSAWGLSGSGAQLFDLHCAGCHPNGGNIIRRGRTLKLKALEKRELNNAQAIAQIAREGIGQMSGYADVLGEGNDVVVADWIWQQAQNAWIQG	GLSGSGAQLFDLHCAGCHPNGGNIIRRGRTLKLKALEKRELNNAQAIAQIAREGIGQMSGYADVLGEGNDVVVADWIWQQAQNAWIQG
Cytochrome c6BC	Synechococcus sp. MIT S9504	MITS9504_00868	ATGAAGACGCTTCTGGCAGGGGTACTGATGCTGATCACACTGTTCTGGCAGAGTTCAAGCGCCTGGAGCCTGAGCGGATCAGGAGCGCAACTGTTTGATCTGCATTGCGCTGGATGTCACCCCAACGGTGGCAACATCATTCGTCGAGGACGGACATTGAAACTCAAGGCCCTCGAGAAACGAGAGCTCAACAATGCACAAGCGATCGCGCAGATTGCCCGCGAAGGAATCGGTCAAATGAGCGGTTATGCCGATGCACTTGGAGCAGGGAATGACATCGTGGTTGCCGACTGGATCTGGCAGCAGGCTCAGAATGCCTGGATCCAGGGATAA	MKTLLAGVLMLITLFWQSSSAWSLSGSGAQLFDLHCAGCHPNGGNIIRRGRTLKLKALEKRELNNAQAIAQIAREGIGQMSGYADALGAGNDIVVADWIWQQAQNAWIQG	SLSGSGAQLFDLHCAGCHPNGGNIIRRGRTLKLKALEKRELNNAQAIAQIAREGIGQMSGYADALGAGNDIVVADWIWQQAQNAWIQG
Cytochrome c6BC	Synechococcus sp. MVIR-18-1	SynMVIR181_02062	TTGTTTCAAAACAATTGCGCGAGTTGCCACCCCAATGGCGAAAACATTATTCGTCGAGGACGCACTCTCAAGATCAAAGCGCTATCAAAGCGTGGACTCGATAGCAGTGAGGCCATCGCGCAAGTCGCCCGAGAAGGAATCGGACAAATGAGTGGTTACGCCGAAACCCTTGGTGAGGGTGGTGATGTGATTGTGGGTGAATGGGTTTGGCAACAAGCTCAAAAGGCCTGGACCCAGGGATAA	MFQNNCASCHPNGENIIRRGRTLKIKALSKRGLDSSEAIAQVAREGIGQMSGYAETLGEGGDVIVGEWVWQQAQKAWTQG	MFQNNCASCHPNGENIIRRGRTLKIKALSKRGLDSSEAIAQVAREGIGQMSGYAETLGEGGDVIVGEWVWQQAQKAWTQG
Cytochrome c6BC	Synechococcus sp. NIES-970	NIES970_24760	ATGAATAAACGCCTTGTCCAAGTGATCATTTTCGTGATGATTGTGCTGCTACTGGTGCCCCTGCTGGCGACCCCGGCCCTGGGGGCAGAACTGGAGTCAGGGGCTCAACTGTTTGAAGCCCACTGCGCTGGCTGCCATCTCAATGGAGGCAATATTATCCGGCGGGGCAAAAACCTCAAAAAACGGGCCATGACTAAAAATGGCTATACCGACATCGAGGCGATCGCCCAGCTTATTACCCAGGGGAAGGGGAATATGTCTGCCTATGGCGAAAAACTAACCCCTGAAGAAATCCAGGCCGTCTCCCACTATGTCCTTGAACAGTCTCAGATGGATTGGCGCCACTAA	MNKRLVQVIIFVMIVLLLVPLLATPALGAELESGAQLFEAHCAGCHLNGGNIIRRGKNLKKRAMTKNGYTDIEAIAQLITQGKGNMSAYGEKLTPEEIQAVSHYVLEQSQMDWRH	AELESGAQLFEAHCAGCHLNGGNIIRRGKNLKKRAMTKNGYTDIEAIAQLITQGKGNMSAYGEKLTPEEIQAVSHYVLEQSQMDWRH
Cytochrome c6BC	Synechococcus sp. NOUM97013	SynNOUM97013_01962	ATGCCTTCATCCGCGGCAACCAACAGCAAACGACGGACAGGCAGACTGAACACCAGCGAAGGTGGTTGGATGCTCCCGTTGATCCTGTCGATGTTGCTGGCATTGACGCTGCTCTGGCCTGCTGAAACCCTGGCCCTCCCCTCATCAGGTGCAGAGCTGTTTGATCTGCACTGTGCAGGCTGCCACCCCAACGGCGGCAACATCATCCGTCGCGGAAAGACGTTGAAACTGAAGGCCCTTGAACAACAAGGCATCAACAATGCGGAGGCGATCGCAGCGATCGCCCGCACAGGCATCGGTCAAATGAGCGGTTATGCCGAAGCCCTTGGGGAAGGCAATGACGTCATCGTGGCTGATTGGATCTGGGAACAAGCTCAAAAGGCCTGGATCCAGGGATAA	MPSSAATNSKRRTGRLNTSEGGWMLPLILSMLLALTLLWPAETLALPSSGAELFDLHCAGCHPNGGNIIRRGKTLKLKALEQQGINNAEAIAAIARTGIGQMSGYAEALGEGNDVIVADWIWEQAQKAWIQG	ALPSSGAELFDLHCAGCHPNGGNIIRRGKTLKLKALEQQGINNAEAIAAIARTGIGQMSGYAEALGEGNDVIVADWIWEQAQKAWIQG
Cytochrome c6BC	Synechococcus sp. PCC 7002	SYNPCC7002_A2391	ATGAATAAACGCCTTGTCCAAGTCATTGTCTTTGTGATGATCGTTCTGTTGCTGGTGCCCCTCCTGGCAACCCCTGCCTTTGGTGCTGATCTCGACCAGGGAGCCCAGATCTTTGAGGCCCATTGTGCCGGCTGTCATCTCAACGGTGGCAATATCGTCCGGCGCGGCAAAAATCTCAAAAAACGGGCCATGGCGAAAAATGGCTATACCTCCGTAGAGGCGATCGCCAATCTTGTTACCCAGGGGAAAGGCAATATGTCCGCCTACGGTGACAAACTCAGCTCTGAAGAAATCCAGGCCGTCTCCCAATACGTTCTCCAGCAATCCCAAACCGACTGGAAATCTTAA	MNKRLVQVIVFVMIVLLLVPLLATPAFGADLDQGAQIFEAHCAGCHLNGGNIVRRGKNLKKRAMAKNGYTSVEAIANLVTQGKGNMSAYGDKLSSEEIQAVSQYVLQQSQTDWKS	ADLDQGAQIFEAHCAGCHLNGGNIVRRGKNLKKRAMAKNGYTSVEAIANLVTQGKGNMSAYGDKLSSEEIQAVSQYVLQQSQTDWKS
Cytochrome c6BC	Synechococcus sp. PCC 7003	AWQ21_12575	ATGAATAAACGCCTTGTCCAAGTCATTGTCTTTGTGATGATCGTTCTGTTGCTGGTGCCCCTCCTGGCAACCCCTGCCTTTGGTGCCGATCTCGACCAGGGAACCCAGATTTTTGAGGCCCATTGCGCTGGCTGTCATCTCAACGGTGGCAACATTGTCCGGCGCGGCAAAAATCTCAAAAAACGAGCGATGGAGAAAAATGGCTATACCTCTGTAGAGGCGATCGCCAATCTCGTCACCCAGGGCAAAGGCAACATGTCCGCCTACGGTGACAAACTCAGCCCCGAAGAAATTCAGGCCGTCTCCCAGTACGTTCTCCAGCAATCCCAAACCAACTGGAAATCTTAG	MNKRLVQVIVFVMIVLLLVPLLATPAFGADLDQGTQIFEAHCAGCHLNGGNIVRRGKNLKKRAMEKNGYTSVEAIANLVTQGKGNMSAYGDKLSPEEIQAVSQYVLQQSQTNWKS	ADLDQGTQIFEAHCAGCHLNGGNIVRRGKNLKKRAMEKNGYTSVEAIANLVTQGKGNMSAYGDKLSPEEIQAVSQYVLQQSQTNWKS
Cytochrome c6BC	Synechococcus sp. PROS-7-1	SynPROS71_00850	ATGCGAGCACTGTTGATTGTCGCTGGGTTATTGATTGCTCTTGCTTTGCCAGCACAGAGGGGCAGCGCCCTATCCACAGATGGCGCCCAGCTGTTTGACCTCCACTGCGCCGGATGTCACCCCAACGGCGGGAACATCATTCGCCGCGGTCGTTCATTGAAATTGAAGGATCTATCAAAACGAGGCCTGGACAATCCAGAAGCGATTGCAGCGATCGCCAGAGAGGGAATCGGCCAAATGAGTGGTTATGGCGACGCCCTCGGCGAGGGAAACGAACACGTTGTTGGCGAATGGGTCTGGCTTCAAGCTCAGAACGCTTGGACCCAGGGATAA	MRALLIVAGLLIALALPAQRGSALSTDGAQLFDLHCAGCHPNGGNIIRRGRSLKLKDLSKRGLDNPEAIAAIAREGIGQMSGYGDALGEGNEHVVGEWVWLQAQNAWTQG	ALSTDGAQLFDLHCAGCHPNGGNIIRRGRSLKLKDLSKRGLDNPEAIAAIAREGIGQMSGYGDALGEGNEHVVGEWVWLQAQNAWTQG
Cytochrome c6BC	Synechococcus sp. PROS-9-1	SynPROS91_01841	ATGATTCGACTCCTCTCATCAATCCTGCTTGCCGTGATGCTCTTGTGGCCGTCAACAGCACTTGCCGTTGAGTCTGGAGCCTCGTTATTTCAAAACAATTGCGCGAGCTGCCACCCCAATGGCGAAAACATTATTCGTCGAGGCCGCACACTGAAGATCAAAGCTTTGACAAAGCGTGGACTCGATAGCAGTGAGGCCATCGCGCAAGTCGCCCGAGCAGGAATCGGACAAATGAGTGGTTACGCCGATGCCCTTGGTGAGGGAGGGGATGTGATTGTGGCCGAATGGGTTTGGCAACAAGCTCAAAATGCCTGGACCCAGGGATAA	MIRLLSSILLAVMLLWPSTALAVESGASLFQNNCASCHPNGENIIRRGRTLKIKALTKRGLDSSEAIAQVARAGIGQMSGYADALGEGGDVIVAEWVWQQAQNAWTQG	LAVESGASLFQNNCASCHPNGENIIRRGRTLKIKALTKRGLDSSEAIAQVARAGIGQMSGYADALGEGGDVIVAEWVWQQAQNAWTQG
Cytochrome c6BC	Synechococcus sp. PROS-U-1	SynPROSU1_01168	GTGCTGACGAATGTCTTGCGGTACTGCGTTGGTGCGTTTCTGCTGCTGCTGCTGAACCTTGGGACAGCCAAGGCCACACCCGCTGCCCTTGAAGGCTCTAGCCAAGGAGCAGTGTTGTTCGAACAGCACTGCGCGGGATGCCACATCAACGGCGGCAACATCATTCGCCGTGGGAAAAATCTGAAGCTGAAGACCCTCGAGCGTGATGACATCGCAACGGTGGATGCCATCGCAGCCATCGCCCGTGAAGGGCGAGGCCAGATGAGCGGTTATGCAGACGTTCTAGGGGCGGATGGTGATCAGCTTGTGGCCGAATGGATCCTGATGCAGGCTCAAAATGCCTGGACCCATTGA	MLTNVLRYCVGAFLLLLLNLGTAKATPAALEGSSQGAVLFEQHCAGCHINGGNIIRRGKNLKLKTLERDDIATVDAIAAIAREGRGQMSGYADVLGADGDQLVAEWILMQAQNAWTH	EGSSQGAVLFEQHCAGCHINGGNIIRRGKNLKLKTLERDDIATVDAIAAIAREGRGQMSGYADVLGADGDQLVAEWILMQAQNAWTH
Cytochrome c6BC	Synechococcus sp. ROS8604	SynROS8604_02570	ATGATTCGACTCCTCTCATCCATCCTGCTGGCCGTGCTGCTCTTGTGGCCATCGACTGCACTTGCCGTGGAGTCGGGAGCCTCGTTATTTCAAAATAATTGTGCTAGCTGCCACCCCAATGGCGAAAACATTATTCGTCGCGGGCGCACACTCAAGATCAAAGCTTTAACCAAGCGTGGAATTGATAGCAGTGAGGCCATCGCGCAAGTCGCCCGAGAAGGAATCGGACAAATGAGTGGTTACGCCGATGCCCTTGGTGAGGGTGGGGATGTGATTGTGGCCGAATGGGTTTGGCAACAAGCTCAAAATGCCTGGATCCAGGGATAA	MIRLLSSILLAVLLLWPSTALAVESGASLFQNNCASCHPNGENIIRRGRTLKIKALTKRGIDSSEAIAQVAREGIGQMSGYADALGEGGDVIVAEWVWQQAQNAWIQG	LAVESGASLFQNNCASCHPNGENIIRRGRTLKIKALTKRGIDSSEAIAQVAREGIGQMSGYADALGEGGDVIVAEWVWQQAQNAWIQG
Cytochrome c6BC	Synechococcus sp. RS9902	SynRS9902_02051	GTGCTGAGCCACCTCCTGCGCTGCTGCATTGGTGCGTTTCTTGTTCTGCTGCTGAGCCTTGGTTCAGCCGGTGCTTCGCTGGCTGCCGGGTCTGACGCCAGCCCCGGCGCCCTGTTGTTCGAACAGCACTGCGCGGGATGCCACATCAACGGTGGCAACATCATTCGCCGGGGAAAAAACCTGAAGCTGAAGACCCTCGAGCGTGAGCAGATCGCAACTGTGGACGCCATCGCAGCCATCGCCCGGGAAGGGCGAGGCCAGATGAGTGGTTACGCCGATGTTCTCGGGAGCGATGGAGATCAGCTCGTGGCTGAATGGGTGCTCATGCAGGCTCAGAACGCCTGGACCCAGGGATAA	MLSHLLRCCIGAFLVLLLSLGSAGASLAAGSDASPGALLFEQHCAGCHINGGNIIRRGKNLKLKTLEREQIATVDAIAAIAREGRGQMSGYADVLGSDGDQLVAEWVLMQAQNAWTQG	SDASPGALLFEQHCAGCHINGGNIIRRGKNLKLKTLEREQIATVDAIAAIAREGRGQMSGYADVLGSDGDQLVAEWVLMQAQNAWTQG
Cytochrome c6BC	Synechococcus sp. RS9909	SynRS9909_01908	ATGGCACGCATCAACCGGATCGGCGCCCTGATTCTTGCCGTCGCCATCTGGTTGCTGAGTCCTGCTCTGCCGGCGAGCGCTGCCGATGGAGAGCAACTGTTCAACAATCACTGCGCCGGTTGCCACCCCCATGGCGGCAACATCATTCGGCGTGGGCGCACGCTGAAACTCCGCGCCCTGGAGCAACGCCAGCTGAATAATCCCGATGCGATCGCCCGCATCGCCCGGGAAGGGATCGGCCAGATGGGAGGTTATGCCGAAGTGCTGGGCCCCAATGGTGATCAACGCGTGGCCGAGTGGATCTGGGACCAGGCTCAGAAGGCCTGGGTCCAGGGATAA	MARINRIGALILAVAIWLLSPALPASAADGEQLFNNHCAGCHPHGGNIIRRGRTLKLRALEQRQLNNPDAIARIAREGIGQMGGYAEVLGPNGDQRVAEWIWDQAQKAWVQG	ASAADGEQLFNNHCAGCHPHGGNIIRRGRTLKLRALEQRQLNNPDAIARIAREGIGQMGGYAEVLGPNGDQRVAEWIWDQAQKAWVQG
Cytochrome c6BC	Synechococcus sp. RS9916	RS9916_27609	ATGATCCGGAAGGCCAGTCGTTCCATCCAATTGATCACCAAGCTGCTGCACACCATTGCCTCACTTGGGATCGTGCTCGCCACCTTGGCAATCTTTCCCGGAGTGAGTCCCGTGCTGGCCACCAGTGGCCAAGAGTTGTTCAGCAACCATTGCGCCGGATGTCATGTCAATGGCGGCAACATCATTCGCCGCGGCCGCACCCTCAAGCTCGCCGCACTCAAAAAGAATGGCCTCGATGACCCCGACGCCATTGCCCGCGTTGCTCGCGAAGGAATCGGACAAATGTCGGGCTATGGCGATGTGCTTGGGGTGGGCGGCGACGAACTTGTGGCCGCCTGGATCTGGGAACAGGCTCAGAACGCTTGGATCCAGGGGTAA	MIRKASRSIQLITKLLHTIASLGIVLATLAIFPGVSPVLATSGQELFSNHCAGCHVNGGNIIRRGRTLKLAALKKNGLDDPDAIARVAREGIGQMSGYGDVLGVGGDELVAAWIWEQAQNAWIQG	VLATSGQELFSNHCAGCHVNGGNIIRRGRTLKLAALKKNGLDDPDAIARVAREGIGQMSGYGDVLGVGGDELVAAWIWEQAQNAWIQG
Cytochrome c6BC	Synechococcus sp. SYN20	SynSYN20_02344	TTGTTTCAAAACAATTGCGCGAGTTGCCACCCCAATGGCGAAAACATTATTCGTCGAGGACGCACTCTCAAGATCAAAGCGTTAAAAAAGCGTGGACTCGATAGCAGTGAGGCCATCGCGCAAGTCGCCCGAGCAGGAATCGGACAAATGAGTGGTTACGCCGAAACCCTCGGTGAGGGTGGTGATGTGATTGTGGGTGAATGGGTTTGGCAACAAGCTCAAAAGGCCTGGACCCAGGGATAA	MFQNNCASCHPNGENIIRRGRTLKIKALKKRGLDSSEAIAQVARAGIGQMSGYAETLGEGGDVIVGEWVWQQAQKAWTQG	MFQNNCASCHPNGENIIRRGRTLKIKALKKRGLDSSEAIAQVARAGIGQMSGYAETLGEGGDVIVGEWVWQQAQKAWTQG
Cytochrome c6BC	Synechococcus sp. TAK9802	SynTAK9802_01676	GTGCTGAGCCACCTCCTGCGCTGCTGCATTGGTGCGTTTCTTGTTCTGCTGCTGAGCCTTGGTTCAGCCGGCGCTTCGCTGGCCGCCGGGGCTGACGCCAGCCCCGGCGGCCTGTTGTTCGAACAGCACTGCGCGGGATGCCACATCAACGGCGGCAACATCATTCGCCGGGGGAAAAACCTGAAGCTGAAGACCCTCGAGCGTGAACAGATCGCAACTGTGGACGCCATCGCAGCCATCGCCCGGGAAGGGCGAGGCCAGATGAGTGGTTACGCTGATGTTCTCGGGAGCGATGGAGATCAGCTCGTGGCTGAATGGGTGCTCATGCAGGCTCAGAACGCCTGGACCCAGGGATAA	MLSHLLRCCIGAFLVLLLSLGSAGASLAAGADASPGGLLFEQHCAGCHINGGNIIRRGKNLKLKTLEREQIATVDAIAAIAREGRGQMSGYADVLGSDGDQLVAEWVLMQAQNAWTQG	ADASPGGLLFEQHCAGCHINGGNIIRRGKNLKLKTLEREQIATVDAIAAIAREGRGQMSGYADVLGSDGDQLVAEWVLMQAQNAWTQG
Cytochrome c6BC	Synechococcus sp. WH 7805	WH7805_00070	TTGGTGATGCGATCACTGTTGGTTTTTGCTGCGCTGTTGATCGCCCTCATCCTTGCCATCGTTCCGGTTCAGAGCGTGGACGCCCTGGCACCGGACGGGGAGCAACTGTTTGATCTTCATTGCGCCGGGTGTCACCCCAACGGTGGAAACATCATCCGCCGCGGCCGTTCACTGAAATTGAAGGATCTATCCAAACGAGGCTTGGACAATCCAGAAGCGATCGCAGCCATTGCCCGAGAGGGAATCGGCCAAATGAGTGGTTATGGCCATGTCCTCGGCGAGGGCAATGACAACGTTGTGGGCGATTGGGTCTGGCTTCAAGCTCAGAACGCTTGGATCCAGGAATAG	MVMRSLLVFAALLIALILAIVPVQSVDALAPDGEQLFDLHCAGCHPNGGNIIRRGRSLKLKDLSKRGLDNPEAIAAIAREGIGQMSGYGHVLGEGNDNVVGDWVWLQAQNAWIQE	ALAPDGEQLFDLHCAGCHPNGGNIIRRGRSLKLKDLSKRGLDNPEAIAAIAREGIGQMSGYGHVLGEGNDNVVGDWVWLQAQNAWIQE
Cytochrome c6BC	Synechococcus sp. WH 8020	WB44_06485	ATGCTTTCACTCCTCTCATCAGTTCTGCTTGCCGTGATGCTGGTATGGCCATCGACTGCACTTGCAGTTGAGTCGGGAGCCTCCTTATTTCAAAACAATTGCGCTAGCTGCCACCCCAATGGCACAAACATTATTCGTCGAGGGCGCACACTCAAGATCAAAGCATTGCGACAACGTGGACTCGATAGCAGCGAGGCCATCGCACAAGTTGCCCGAGAAGGAATCGGACAAATGAGTGGTTACGCCGATGCCCTTGGAGACGGTGGGGATGTGGTTGTAGCCGAATGGGTTTGGCAACAGGCTCAAAAGGCTTGGACCCAGGGATAA	MLSLLSSVLLAVMLVWPSTALAVESGASLFQNNCASCHPNGTNIIRRGRTLKIKALRQRGLDSSEAIAQVAREGIGQMSGYADALGDGGDVVVAEWVWQQAQKAWTQG	LAVESGASLFQNNCASCHPNGTNIIRRGRTLKIKALRQRGLDSSEAIAQVAREGIGQMSGYADALGDGGDVVVAEWVWQQAQKAWTQG
Cytochrome c6BC	Synechococcus sp. WH 8101	SynRCC2555_01976	TTGGAATGGACGACCTTGATGGCACGCATCAACCGGATCGGCGCCCTGATACTTGCCGTCGCCATCTGGTTGCTGAGTCCTGCTCTGCAGGCCAGCGCTGCCGATGGTGAGCAACTGTTCAACAATCACTGCGCCGGTTGTCACCCCCATGGCGGCAACATCATCCGTCGTGGGCGCACGCTGAAACTCCGCGCCCTGGAGCAACGACAGCTGAACAATCCCGATGCAATTGCACGCATCGCCCGGGAAGGGATCGGCCAGATGGGCGGCTATGCCGAGGTGCTGGGCCCCAATGGTGATCAAGTCGTGGCCCAGTGGATCTGGAACCAGGCTCAGAAGGCTTGGGTCCAGGGATAA	MEWTTLMARINRIGALILAVAIWLLSPALQASAADGEQLFNNHCAGCHPHGGNIIRRGRTLKLRALEQRQLNNPDAIARIAREGIGQMGGYAEVLGPNGDQVVAQWIWNQAQKAWVQG	ASAADGEQLFNNHCAGCHPHGGNIIRRGRTLKLRALEQRQLNNPDAIARIAREGIGQMGGYAEVLGPNGDQVVAQWIWNQAQKAWVQG
Cytochrome c6BC	Tolypothrix sp. PCC 7601	FDUTEX481_06780	ATGAAAAAGCAATTAAACAAACTCATAAAGTTGCTATTGATTACTTGTTTAAGCTTGACAAGTATTTTCACATCTTCTGCTCATGCAGCAGATTTAGTTAATGGCGCACAAATATTCGAGGTTCATTGTGTGGGCTGTCATATTAACGGTGGTAATATTGTCAGGCGTGGTAAGACCTTAAAGAAAAAAGCTCTCAAGAAATATGGTATGGATTCTCTAGAGGCAATATCATCCATTGTCACCAATGGTAAAAATAATATGTCAGCTTATAAAGACCGCCTCACTGCAGAGCAAATACAAGATGTTGCGGCTTATGTTTTAGAGCAATCTGCAAAAGACTGGCGTTAA	MKKQLNKLIKLLLITCLSLTSIFTSSAHAADLVNGAQIFEVHCVGCHINGGNIVRRGKTLKKKALKKYGMDSLEAISSIVTNGKNNMSAYKDRLTAEQIQDVAAYVLEQSAKDWR	ADLVNGAQIFEVHCVGCHINGGNIVRRGKTLKKKALKKYGMDSLEAISSIVTNGKNNMSAYKDRLTAEQIQDVAAYVLEQSAKDWR
Cytochrome c6BC	Trichodesmium erythraeum IMS101	Tery_4618	ATGAAAAAAATAATTACAGTTTGCTTGTTAATATTTATATTAATAAACATTATTAAAATACCCACTGTATTAGCAACAGAAATAACACAAGGCGCAGAAGTTTTTCAGATTCATTGTGCAGGTTGTCATGCCAAAGGAGGCAATATTGTTAAATGGTGGAAGAACTTAAAAATAAGAACTTTGAAAAGAAATAAATTAGATTCTGTTGAGGCGATAGCTTACTTAGTTAAGAATGGGAAAAATAATATGTCAGCTTACAAAGACCGTTTAACAGAAATAGAGATACAAACAGTATCAGCCTATGTATTGAAACAGGCAGAAAACCGTTGGAATTAA	MKKIITVCLLIFILINIIKIPTVLATEITQGAEVFQIHCAGCHAKGGNIVKWWKNLKIRTLKRNKLDSVEAIAYLVKNGKNNMSAYKDRLTEIEIQTVSAYVLKQAENRWN	TEITQGAEVFQIHCAGCHAKGGNIVKWWKNLKIRTLKRNKLDSVEAIAYLVKNGKNNMSAYKDRLTEIEIQTVSAYVLKQAENRWN
Cytochrome c6BC	Trichormus variabilis SAG 1403-4b	DSM107003_10840	GTGAGAAGATTACTAACATTAATATTAGTTACCCTGTCATTATGGACAAGCATTTTGATTTTACCTGCTAATGCAGTAGATACTATAAATGGTGCAGAAGTGTTTAATGTGCATTGTGTTGGTTGTCATATCGATGGCGGTAACATTATTAGATGGGGTAAAAATCTCAAAAAGAATGCACTCAAAAAATATGGGATGGATTCCTTAGAGGCGATTACAAATATCGTCACTAATGGTAAAAATAATATGTCAGCCTACAAAGAAAGATTAACAACAGCGGAAATTGAAAACGTTGCAGCTTATGTTTTGGAACAAGCAGAAAAAAATTGGAAATAA	MRRLLTLILVTLSLWTSILILPANAVDTINGAEVFNVHCVGCHIDGGNIIRWGKNLKKNALKKYGMDSLEAITNIVTNGKNNMSAYKERLTTAEIENVAAYVLEQAEKNWK	VDTINGAEVFNVHCVGCHIDGGNIIRWGKNLKKNALKKYGMDSLEAITNIVTNGKNNMSAYKERLTTAEIENVAAYVLEQAEKNWK
Cytochrome c6BC	Westiellopsis prolifica IICB1	B4U84_25260	ATGTGTGTTAAAACTACTCTAAAATTTATACTGTTGCTCTTCACAGTGTTGATAATTAGCTTCAGCCAACCAGCATTAGCCGCAGATACAACCAATGGCGCAAAAATCTTTGATGTTCATTGCGCTGGTTGCCATATCAACGGTAGTAATATCATCAGGCGAGGTAAAAACTTAAAGCTTAAAGCACTAAAAAAATATGGTATGGATTCAATAGAAGCTATTTCTTCCCTTGTTGCTAACGGTAAAAATAATATGTCAGCCTATAAAGACCGTCTTAGTGAGCAAGAAATACAAGATGTCGCCGTCTATGTTTTACAACAAGCCGAAAAAGGCTGGCGTTAA	MCVKTTLKFILLLFTVLIISFSQPALAADTTNGAKIFDVHCAGCHINGSNIIRRGKNLKLKALKKYGMDSIEAISSLVANGKNNMSAYKDRLSEQEIQDVAVYVLQQAEKGWR	ADTTNGAKIFDVHCAGCHINGSNIIRRGKNLKLKALKKYGMDSIEAISSLVANGKNNMSAYKDRLSEQEIQDVAVYVLQQAEKGWR
Cytochrome c6D	Calothrix desertica PCC 7102	CAL7102_04137	TTGAGATTTATTCATAAACTACTATTAGCAGTAGTAATAATACTGCTTTCTTTCGCATGGACAAGCCCAGTATTTGCCGATAATAACGGAGATAGAATTTTTACAAATAATTGTTCTTCTTGTCACCTTGGTGGTGGGAATATATTGATAGCCAATAAGACTTTACACAAAGAAGCTTTATCTCAGTACTTAGATAATTATAATACTGAATCAATACAGGCAATTATACACCAAATCAAAAATGGCAAAGGCGCCATGCCTGCTTTTAAAAATAAGTTGAACGAGGAAGAAATTCTAGAAGTCGCTGCTTATGTTTTTCAAAAAGCCGAACAAGGATGGTAA	MRFIHKLLLAVVIILLSFAWTSPVFADNNGDRIFTNNCSSCHLGGGNILIANKTLHKEALSQYLDNYNTESIQAIIHQIKNGKGAMPAFKNKLNEEEILEVAAYVFQKAEQGW	FADNNGDRIFTNNCSSCHLGGGNILIANKTLHKEALSQYLDNYNTESIQAIIHQIKNGKGAMPAFKNKLNEEEILEVAAYVFQKAEQGW
Cytochrome c6D	Calothrix sp. 336/3	IJ00_13895	TTGAGAACAATTCTATTGATTTTGGTGACAGCGATCGCCTGTGTATCTCTAACATTTACGAATCCAGCATTTGCAGTAGAACCTGTCAATGGGGCAAAAATTTTTCAGAAAAACTGTGCTGCTTGCCACATTGGGGGTGGTAATATCCTCATCGCGGAAAAAACTTTAAAGCAGGAAGCATTGGAAACATACCTGGAAAACTATAAAATTACAGGCATCCAGGCAATTATCCATCAAGTGAAAAATGGTAAGAATGCTATGCCAGCTTTTAAAAATAAGCTAACAGAGCAGGAAGTTTTAGAAGTAGCAACTTACGTTTTGGAAAATGCTACCAAGGGATGGAAGGGAAGTACAGAACCATAA	MRTILLILVTAIACVSLTFTNPAFAVEPVNGAKIFQKNCAACHIGGGNILIAEKTLKQEALETYLENYKITGIQAIIHQVKNGKNAMPAFKNKLTEQEVLEVATYVLENATKGWKGSTEP	VEPVNGAKIFQKNCAACHIGGGNILIAEKTLKQEALETYLENYKITGIQAIIHQVKNGKNAMPAFKNKLTEQEVLEVATYVLENATKGWKGSTEP
Cytochrome c6D	Calothrix sp. HK-06	NIES2101_15705	TTGAGATTTATTCATAAACTACTATTAGCAGTAGTAATAATACTGCTTTCTTTGGCATGGACAAACCCAGTATTTGCCGAATCTAACGGAGATAGAATTTTTACAAATAATTGCTCTTCTTGTCACCTTGGTGGTGGCAATATATTGATAGCCAATAAGACTTTACACAAAGAAGCTTTATCTCAGTACTTAGACAATTATAATACTGACTCAATACAGGCAATTATACACCAAGTCAAGAACGGCAAAGGCGCCATGCCTGCTTTCAAAAATAAGTTGAACGAGGAAGAAATTCTGGAAGTTGCTGCTTATGTGTTTCAAAAAGCCGAACAAGGATGGTAA	MRFIHKLLLAVVIILLSLAWTNPVFAESNGDRIFTNNCSSCHLGGGNILIANKTLHKEALSQYLDNYNTDSIQAIIHQVKNGKGAMPAFKNKLNEEEILEVAAYVFQKAEQGW	FAESNGDRIFTNNCSSCHLGGGNILIANKTLHKEALSQYLDNYNTDSIQAIIHQVKNGKGAMPAFKNKLNEEEILEVAAYVFQKAEQGW
Cytochrome c6D	Calothrix sp. NIES-4071	NIES4071_66930	GTGCTTGGGTTCGCCTTTCCGTATCCAGCACTAGCCGATATTGATAACGGAGCAAAAATTTTTACAAATAATTGTTCTTCTTGTCATTTGGGTGGTGGCAATATATTAATAGCAAATAAGACTTTATCTAAAGAAGCGTTGTCTCAATACTTGGATAATTATAATACTGATTCAATAGAGGCAATTATTCATCAAGTAAAGAACGGCAAAGGTGCTATGCCAGCTTTTAAAAACAAATTAAGTGAGCAAGAAATTTTAGAAGTTACTGCTTACGTGTTTCAAAAAGCTGAACAAGGATGGCAGGAAAATTCGTAA	MLGFAFPYPALADIDNGAKIFTNNCSSCHLGGGNILIANKTLSKEALSQYLDNYNTDSIEAIIHQVKNGKGAMPAFKNKLSEQEILEVTAYVFQKAEQGWQENS	ADIDNGAKIFTNNCSSCHLGGGNILIANKTLSKEALSQYLDNYNTDSIEAIIHQVKNGKGAMPAFKNKLSEQEILEVTAYVFQKAEQGWQENS
Cytochrome c6D	Calothrix sp. PCC 6303	Cal6303_0740	ATGATCAGACTATCAGCGATCGCGCTATTATTTTTACTATTGCCCTACAATGCTTTAGCTGCGGAAGTGTCAAATGGTGCCAAAATCTTCAATAATAATTGTGCTTCTTGTCATCTAGGTGGTGGTAATATCTTGATTGGTGAGAAAACTCTGCAAAAATCAGCATTATCACAGTATTTAGAGGGTTACAACACGGATGCGATCGCCTCTATCATCCATCAGGTACAAAATGGTAAGGGTGCAATGCCTGCTTTTAAGAGTAAATTGAAGGAACAGGAGATTTTGGAGGTTGCTGCTTATGTCTTCCAACAAGCTGAAGAGGGATGGTAA	MIRLSAIALLFLLLPYNALAAEVSNGAKIFNNNCASCHLGGGNILIGEKTLQKSALSQYLEGYNTDAIASIIHQVQNGKGAMPAFKSKLKEQEILEVAAYVFQQAEEGW	AEVSNGAKIFNNNCASCHLGGGNILIGEKTLQKSALSQYLEGYNTDAIASIIHQVQNGKGAMPAFKSKLKEQEILEVAAYVFQQAEEGW
Cytochrome c6D	Calothrix sp. PCC 7507	Cal7507_4356	TTGAGAATACTTTTATTTATTCTGCTGTTAGCGATCGCTCTATTTAGATTTACATTCATTCTGCCAGCACTAGCCGCCGAAACAGCCAATGGTGCCAAAATCTTCAATGCTAACTGTTCTTCTTGCCATATAGGTGGTGGAAATATATTAATTAGCCAGAAAACCTTGACAAAAGAAGCATTATCAAAATATCTGGAAAATTATGATCAGGATTCTATTCAGGCAATTATCTATCAAGTACAAAACGGTAAAAATGCCATGCCTGCCTTTAAAAACAAGTTAAGCAATCAGGAAATTTTAGAGGTAGCTACTTACATTTTCCAACAAGCAGAACAAGGATGGTGA	MRILLFILLLAIALFRFTFILPALAAETANGAKIFNANCSSCHIGGGNILISQKTLTKEALSKYLENYDQDSIQAIIYQVQNGKNAMPAFKNKLSNQEILEVATYIFQQAEQGW	AETANGAKIFNANCSSCHIGGGNILISQKTLTKEALSKYLENYDQDSIQAIIYQVQNGKNAMPAFKNKLSNQEILEVATYIFQQAEQGW
Cytochrome c6D	Chlorogloeopsis fritschii PCC 6912	PCC6912_03910	ATGACTGGAGATGTTTTTCATCTGCTGGAAGCTTATTGCAAGGAGAATAGCTTGAAAATATTTTTATTCATCCTGTTTTTAGCGATCGCCCTATTCAGTTTTATATTTATTGATCCAGTACTAGCAGCCGAAACATCAAAGGCTGCTAAAATTTTTAACTCTAACTGTGCTTCTTGTCATATAGGTGGTGGCAACATCCTCATTAGCGAGAAAACTTTGAAAAAGGAGGCTTTGCAGAAGTATCTGGAAAATTACGAACTCAATTCAATTGCTGCGATCGTTCACCAGGTACAGAATGGTAAAGGTGCAATGCCTGCTTTTAAAAGCAAGTTAAATGAACAAGAGATTAATGAGGTAGCAGCTTACGTTTTCCAAAAAGCAGAACAAGGATGGTAA	MTGDVFHLLEAYCKENSLKIFLFILFLAIALFSFIFIDPVLAAETSKAAKIFNSNCASCHIGGGNILISEKTLKKEALQKYLENYELNSIAAIVHQVQNGKGAMPAFKSKLNEQEINEVAAYVFQKAEQGW	AETSKAAKIFNSNCASCHIGGGNILISEKTLKKEALQKYLENYELNSIAAIVHQVQNGKGAMPAFKSKLNEQEINEVAAYVFQKAEQGW
Cytochrome c6D	Cylindrospermopsis raciborskii C03	CEP13_00505	TTGTCTAGACCTCTACCGTTATTAGTTTTAATTCTAGCGATCGCCGTATTTTTTAGCTTCACACTTATTATCGAACCAGTCTTATCAGCAGAAATAAGTAGAGGTCATGCTATTTTTAAGACCGAATGTGCTTCCTGCCATGTAGGGGGTGGTAACATACTTGTTGAAAATAAGACTCTGAAAACATCAGCCATGAAAAAATACTTAGAAAACTATGACACTGACCCTATTGGAGCGATTGTGAATCAAATTCAGAATGGGAAAAGTGCCATGCCTGCTTTTAAGAACAAGTTAACCAAGGAAGAAATTTTAGAGGTGGGTCTCTATGTTTTTCAAATGGCAGAAACAGGATGGTAG	MSRPLPLLVLILAIAVFFSFTLIIEPVLSAEISRGHAIFKTECASCHVGGGNILVENKTLKTSAMKKYLENYDTDPIGAIVNQIQNGKSAMPAFKNKLTKEEILEVGLYVFQMAETGW	AEISRGHAIFKTECASCHVGGGNILVENKTLKTSAMKKYLENYDTDPIGAIVNQIQNGKSAMPAFKNKLTKEEILEVGLYVFQMAETGW
Cytochrome c6D	Cylindrospermopsis raciborskii C07	CEP15_03990	TTGTCTAGACCTCTACCGTTATTAGTTTTAATTCTAGCGATCGCCGTATTTTTTAGCTTCACACTTATTATCGAACCAGTCTTATCAGCAGAAATAAGTAGAGGTCATGCTATTTTTAAGACCGAATGTGCTTCCTGCCATGTAGGGGGTGGTAACATACTTGTTGAAAATAAGACTCTGAAAACATCAGCCATGAAAAAATACTTAGAAAACTATGACACTGACCCTATTGGAGCGATTGTGAATCAAATTCAGAATGGGAAAAGTGCCATGCCTGCTTTTAAGAACAAGTTAACCAAGGAAGAAATTTTAGAGGTGGGTCTCTATGTTTTTCAAATGGCAGAAACAGGATGGTAG	MSRPLPLLVLILAIAVFFSFTLIIEPVLSAEISRGHAIFKTECASCHVGGGNILVENKTLKTSAMKKYLENYDTDPIGAIVNQIQNGKSAMPAFKNKLTKEEILEVGLYVFQMAETGW	AEISRGHAIFKTECASCHVGGGNILVENKTLKTSAMKKYLENYDTDPIGAIVNQIQNGKSAMPAFKNKLTKEEILEVGLYVFQMAETGW
Cytochrome c6D	Cylindrospermopsis raciborskii CENA302	CENA302_08535	TTGTCCAGACCTCTACCGTTATTAGTTTTAATTCTAGCGATCGCCCTATTTTTTAGCTTCACACTTATTATCGAACCAGTCTTATCAGCTGAAATAAGTAGAGGTCATGCAATTTTCAATGCCGAATGTGCTTCTTGCCATGTGGGGGGTGGTAACATACTTGTTGAAAATAAAACTCTACAAACATCAGCCATGAAAAAATACTTAGAAAACTATGATACTGACCCTGTTGGAGCAATTGTGAATCAAATCTGGAATGGGAAAAGTGCCATGCCTGCTTTTAAAAACAAATTAACCAAAGAAGAAATTTTAGAAGTGGGTCTCTATGTTTTTCAAATGGCAGAAACAGGATGGTAG	MSRPLPLLVLILAIALFFSFTLIIEPVLSAEISRGHAIFNAECASCHVGGGNILVENKTLQTSAMKKYLENYDTDPVGAIVNQIWNGKSAMPAFKNKLTKEEILEVGLYVFQMAETGW	AEISRGHAIFNAECASCHVGGGNILVENKTLQTSAMKKYLENYDTDPVGAIVNQIWNGKSAMPAFKNKLTKEEILEVGLYVFQMAETGW
Cytochrome c6D	Cylindrospermopsis raciborskii CENA303	B7O87_03620	TTGTCTAGACCTCTACCGTTATTAGTTTTAATTCTAGCGATCGCCCTATTTTTTAGCTTCACACTTATTATCGAACCAGTCTTATCAGCAGAAATAAGTAGAGGTCATGCAATTTTTAATGCCGAATGTGCTTCCTGCCATGTAGGGGGTGGTAACATACTTGTTCAAAATAAGACTCTACAAACATCAGCTATGAAAAAATACTTAGAAAACTATGATACTGACCCTATTGGAGGAATTGTGAATCAAATTCAGAATGGGAAAAGTGCCATGCCTGCTTTTAAAAACAAATTAACCAAAGAAGAAATTCTAGAGGTGGGTCTCTATGTTTTTCAAATGGCAGAAACAGGATGGTAG	MSRPLPLLVLILAIALFFSFTLIIEPVLSAEISRGHAIFNAECASCHVGGGNILVQNKTLQTSAMKKYLENYDTDPIGGIVNQIQNGKSAMPAFKNKLTKEEILEVGLYVFQMAETGW	AEISRGHAIFNAECASCHVGGGNILVQNKTLQTSAMKKYLENYDTDPIGGIVNQIQNGKSAMPAFKNKLTKEEILEVGLYVFQMAETGW
Cytochrome c6D	Cylindrospermopsis raciborskii Cr2010	C6N34_08160	TTGTCTAGACCTCTACCGTTATTAGTTTTAATTCTAGCGATCGTTGTATTTTTTAGCTTCACACTTATTATCGAACCAGTCTTATCAGCAGAAACAAGTAGAGGTCATGCTATTTTTAAGACCGAATGTGCTTCCTGCCATGTAGGGGGTGGTAACATACTTGTTGAAAATAAGACTCTGAAAACATCAGCCATGCAAAAATACTTAGAAAACTATGACACTGACCCTATTGGAGCGATTGTGAATCAAATTCAGAATGGGAAAAGTGCCATGCCTGCTTTTAAGAACAAGTTAACCAAGGAAGAAATTCTAGAGGTGGGTCTCTATGTTTTTCAAATGGCAGAAACAGGATGGTAG	MSRPLPLLVLILAIVVFFSFTLIIEPVLSAETSRGHAIFKTECASCHVGGGNILVENKTLKTSAMQKYLENYDTDPIGAIVNQIQNGKSAMPAFKNKLTKEEILEVGLYVFQMAETGW	AETSRGHAIFKTECASCHVGGGNILVENKTLKTSAMQKYLENYDTDPIGAIVNQIQNGKSAMPAFKNKLTKEEILEVGLYVFQMAETGW
Cytochrome c6D	Cylindrospermopsis raciborskii CS-505	A9P98_09980	TTGTCTAGACCTCTACCGTTATTAGTTTTAATTCTAGCGATCGCCGTATTTTTTAGCTTCACACTTATTATCGAACCAGTCTTATCAGCAGAAATAAGTAGAGGTCATGCTATTTTTAAGACCGAATGTGCTTCCTGCCATGTAGGGGGTGGTAACATACTTGTTGAAAATAAGACTCTGAAAACATCAGCCATGAAAAAATACTTAGAAAACTATGACACTGACCCTATTGGAGCGATTGTGAATCAAATTCAGAATGGGAAAAGTGCCATGCCTGCTTTTAAGAACAAGTTAACCAAGGAAGAAATTTTAGAGGTGGGTCTCTATGTTTTTCAAATGGCAGAAACAGGATGGTAG	MSRPLPLLVLILAIAVFFSFTLIIEPVLSAEISRGHAIFKTECASCHVGGGNILVENKTLKTSAMKKYLENYDTDPIGAIVNQIQNGKSAMPAFKNKLTKEEILEVGLYVFQMAETGW	AEISRGHAIFKTECASCHVGGGNILVENKTLKTSAMKKYLENYDTDPIGAIVNQIQNGKSAMPAFKNKLTKEEILEVGLYVFQMAETGW
Cytochrome c6D	Cylindrospermopsis raciborskii CS-508	BCV63_07215	TTGTCTAGACCTCTACCGTTATTAGTTTTAATTCTAGCGATCGCCGTATTTTTTAGCTTCACACTTATTATCGAACCAGTCTTATCAGCAGAAATAAGTAGAGGTCATGCTATTTTTAAGACCGAATGTGCTTCCTGCCATGTAGGGGGTGGTAACATACTTGTTGAAAATAAGACTCTGAAAACATCAGCCATGAAAAAATACTTAGAAAACTATGACACTGACCCTATTGGAGCGATTGTGAATCAAATTCAGAATGGGAAAAGTGCCATGCCTGCTTTTAAGAACAAGTTAACCAAGGAAGAAATTTTAGAGGTGGGTCTCTATGTTTTTCAAATGGCAGAAACAGGATGGTAG	MSRPLPLLVLILAIAVFFSFTLIIEPVLSAEISRGHAIFKTECASCHVGGGNILVENKTLKTSAMKKYLENYDTDPIGAIVNQIQNGKSAMPAFKNKLTKEEILEVGLYVFQMAETGW	AEISRGHAIFKTECASCHVGGGNILVENKTLKTSAMKKYLENYDTDPIGAIVNQIQNGKSAMPAFKNKLTKEEILEVGLYVFQMAETGW
Cytochrome c6D	Cylindrospermopsis raciborskii MVCC14	BCV64_00690	TTGTCTAGACCTCTACCGTTATTAGTTTTAATTCTAGCGATCGCCCTATTTTTTAGCTTCACACTTATTATCGAACCAGTCTTATCAGCTGAAATAAGTAGAGGTCATGCAATTTTCAATGCCGAATGTGCTTCTTGCCATGTGGGGGGTGGTAACATACTTGTTGAAAATAAAACTCTACAAACATCAGCCATGAAAAAATACTTAGAAAACTATGATACTGACCCTGTTGGAGCAATTGTGAATCAAATCTGGAATGGGAAAAGTGCCATGCCTGCTTTTAAAAACAAATTAACCAAAGAAGAAATTTTAGAAGTGGGTCTCTATGTTTTTCAAATGGCAGAAACAGGATGGTAG	MSRPLPLLVLILAIALFFSFTLIIEPVLSAEISRGHAIFNAECASCHVGGGNILVENKTLQTSAMKKYLENYDTDPVGAIVNQIWNGKSAMPAFKNKLTKEEILEVGLYVFQMAETGW	AEISRGHAIFNAECASCHVGGGNILVENKTLQTSAMKKYLENYDTDPVGAIVNQIWNGKSAMPAFKNKLTKEEILEVGLYVFQMAETGW
Cytochrome c6D	Cylindrospermopsis raciborskii S01	CEP07_00050	TTGTCTAGACCTCTACCGTTATTAGTTTTAATTCTAGCGATCGCCGTATTTTTTAGCTTCACACTTATTATCGAACCAGTCTTATCAGCAGAAATAAGTAGAGGTCATGCTATTTTTAAGACCGAATGTGCTTCCTGCCATGTAGGGGGTGGTAACATACTTGTTGAAAATAAGACTCTGAAAACATCAGCCATGAAAAAATACTTAGAAAACTATGACACTGACCCTATTGGAGCGATTGTGAATCAAATTCAGAATGGGAAAAGTGCCATGCCTGCTTTTAAGAACAAGTTAACCAAGGAAGAAATTTTAGAGGTGGGTCTCTATGTTTTTCAAATGGCAGAAACAGGATGGTAG	MSRPLPLLVLILAIAVFFSFTLIIEPVLSAEISRGHAIFKTECASCHVGGGNILVENKTLKTSAMKKYLENYDTDPIGAIVNQIQNGKSAMPAFKNKLTKEEILEVGLYVFQMAETGW	AEISRGHAIFKTECASCHVGGGNILVENKTLKTSAMKKYLENYDTDPIGAIVNQIQNGKSAMPAFKNKLTKEEILEVGLYVFQMAETGW
Cytochrome c6D	Cylindrospermopsis raciborskii S05	CEP08_06615	TTGTCTAGACCTCTACCGTTATTAGTTTTAATTCTAGCGATCGCCGTATTTTTTAGCTTCACACTTATTATCGAACCAGTCTTATCAGCAGAAATAAGTAGAGGTCATGCTATTTTTAAGACCGAATGTGCTTCCTGCCATGTAGGGGGTGGTAACATACTTGTTGAAAATAAGACTCTGAAAACATCAGCCATGAAAAAATACTTAGAAAACTATGACACTGACCCTATTGGAGCGATTGTGAATCAAATTCAGAATGGGAAAAGTGCCATGCCTGCTTTTAAGAACAAGTTAACCAAGGAAGAAATTTTAGAGGTGGGTCTCTATGTTTTTCAAATGGCAGAAACAGGATGGTAG	MSRPLPLLVLILAIAVFFSFTLIIEPVLSAEISRGHAIFKTECASCHVGGGNILVENKTLKTSAMKKYLENYDTDPIGAIVNQIQNGKSAMPAFKNKLTKEEILEVGLYVFQMAETGW	AEISRGHAIFKTECASCHVGGGNILVENKTLKTSAMKKYLENYDTDPIGAIVNQIQNGKSAMPAFKNKLTKEEILEVGLYVFQMAETGW
Cytochrome c6D	Cylindrospermopsis raciborskii S06	CEP09_01200	TTGTCTAGACCTCTACCGTTATTAGTTTTAATTCTAGCGATCGCCGTATTTTTTAGCTTCACACTTATTATCGAACCAGTCTTATCAGCAGAAATAAGTAGAGGTCATGCTATTTTTAAGACCGAATGTGCTTCCTGCCATGTAGGGGGTGGTAACATACTTGTTGAAAATAAGACTCTGAAAACATCAGCCATGAAAAAATACTTAGAAAACTATGACACTGACCCTATTGGAGCGATTGTGAATCAAATTCAGAATGGGAAAAGTGCCATGCCTGCTTTTAAGAACAAGTTAACCAAGGAAGAAATTTTAGAGGTGGGTCTCTATGTTTTTCAAATGGCAGAAACAGGATGGTAG	MSRPLPLLVLILAIAVFFSFTLIIEPVLSAEISRGHAIFKTECASCHVGGGNILVENKTLKTSAMKKYLENYDTDPIGAIVNQIQNGKSAMPAFKNKLTKEEILEVGLYVFQMAETGW	AEISRGHAIFKTECASCHVGGGNILVENKTLKTSAMKKYLENYDTDPIGAIVNQIQNGKSAMPAFKNKLTKEEILEVGLYVFQMAETGW
Cytochrome c6D	Cylindrospermopsis raciborskii S07	CEP10_03165	TTGTCTAGACCTCTACCGTTATTAGTTTTAATTCTAGCGATCGCCGTATTTTTTAGCTTCACACTTATTATCGAACCAGTCTTATCAGCAGAAATAAGTAGAGGTCATGCTATTTTTAAGACCGAATGTGCTTCCTGCCATGTAGGGGGTGGTAACATACTTGTTGAAAATAAGACTCTGAAAACATCAGCCATGAAAAAATACTTAGAAAACTATGACACTGACCCTATTGGAGCGATTGTGAATCAAATTCAGAATGGGAAAAGTGCCATGCCTGCTTTTAAGAACAAGTTAACCAAGGAAGAAATTTTAGAGGTGGGTCTCTATGTTTTTCAAATGGCAGAAACAGGATGGTAG	MSRPLPLLVLILAIAVFFSFTLIIEPVLSAEISRGHAIFKTECASCHVGGGNILVENKTLKTSAMKKYLENYDTDPIGAIVNQIQNGKSAMPAFKNKLTKEEILEVGLYVFQMAETGW	AEISRGHAIFKTECASCHVGGGNILVENKTLKTSAMKKYLENYDTDPIGAIVNQIQNGKSAMPAFKNKLTKEEILEVGLYVFQMAETGW
Cytochrome c6D	Cylindrospermopsis raciborskii S10	CEP11_08325	TTGTCTAGACCTCTACCGTTATTAGTTTTAATTCTAGCGATCGCCGTATTTTTTAGCTTCACACTTATTATCGAACCAGTCTTATCAGCAGAAATAAGTAGAGGTCATGCTATTTTTAAGACCGAATGTGCTTCCTGCCATGTAGGGGGTGGTAACATACTTGTTGAAAATAAGACTCTGAAAACATCAGCCATGAAAAAATACTTAGAAAACTATGACACTGACCCTATTGGAGCGATTGTGAATCAAATTCAGAATGGGAAAAGTGCCATGCCTGCTTTTAAGAACAAGTTAACCAAGGAAGAAATTTTAGAGGTGGGTCTCTATGTTTTTCAAATGGCAGAAACAGGATGGTAG	MSRPLPLLVLILAIAVFFSFTLIIEPVLSAEISRGHAIFKTECASCHVGGGNILVENKTLKTSAMKKYLENYDTDPIGAIVNQIQNGKSAMPAFKNKLTKEEILEVGLYVFQMAETGW	AEISRGHAIFKTECASCHVGGGNILVENKTLKTSAMKKYLENYDTDPIGAIVNQIQNGKSAMPAFKNKLTKEEILEVGLYVFQMAETGW
Cytochrome c6D	Cylindrospermopsis raciborskii S14	CEP12_07210	TTGTCTAGACCTCTACCGTTATTAGTTTTAATTCTAGCGATCGCCGTATTTTTTAGCTTCACACTTATTATCGAACCAGTCTTATCAGCAGAAATAAGTAGAGGTCATGCTATTTTTAAGACCGAATGTGCTTCCTGCCATGTAGGGGGTGGTAACATACTTGTTGAAAATAAGACTCTGAAAACATCAGCCATGAAAAAATACTTAGAAAACTATGACACTGACCCTATTGGAGCGATTGTGAATCAAATTCAGAATGGGAAAAGTGCCATGCCTGCTTTTAAGAACAAGTTAACCAAGGAAGAAATTTTAGAGGTGGGTCTCTATGTTTTTCAAATGGCAGAAACAGGATGGTAG	MSRPLPLLVLILAIAVFFSFTLIIEPVLSAEISRGHAIFKTECASCHVGGGNILVENKTLKTSAMKKYLENYDTDPIGAIVNQIQNGKSAMPAFKNKLTKEEILEVGLYVFQMAETGW	AEISRGHAIFKTECASCHVGGGNILVENKTLKTSAMKKYLENYDTDPIGAIVNQIQNGKSAMPAFKNKLTKEEILEVGLYVFQMAETGW
Cytochrome c6D	Cylindrospermopsis sp. CR12	ASL19_00875	TTGTCTAGACCTCTACCGTTATTAGTTTTAATTCTAGCGATCGCCGTATTTTTTAGCTTCACACTTATTATCGAACCAGTTTTATCAGCAGAAATAAGTAGAGGTCATGCTATTTTTAAGACCGAATGTGCTTCCTGCCATGTAGGGGGTGGTAACATACTCGTTGAAAATAAAACTCTACAAACATCAGCCATGAAAAAATACTTAGAAAACTATGACACTGACCCTATTGGAGCGATTGTGAATCAAATTCAGAATGGGAAAAGTGCCATGCCTGCTTTTAAGAACAAGTTAACCAAGGAAGAAATTCTAGAGGTGGGTCTCTATGTTTTTCAAATGGCAGAAACAGGATGGTAG	MSRPLPLLVLILAIAVFFSFTLIIEPVLSAEISRGHAIFKTECASCHVGGGNILVENKTLQTSAMKKYLENYDTDPIGAIVNQIQNGKSAMPAFKNKLTKEEILEVGLYVFQMAETGW	AEISRGHAIFKTECASCHVGGGNILVENKTLQTSAMKKYLENYDTDPIGAIVNQIQNGKSAMPAFKNKLTKEEILEVGLYVFQMAETGW
Cytochrome c6D	Cylindrospermum sp. NIES-4074	NIES4074_45330	ATGTCAGTGGAGATGGTTTTTCAGTTGCTGGATGCTTGTTGCAAGGAGAATCTTTTGAGAATAGTTTTATTAATTCTGCTGACGGCGATCGCTATATTTAAATTAACTTTTATTTACCCAGCACTAGCTGTCGAAATGCCCAACGGCGCCAAAATCTTTAATTCTAACTGCGCTTCTTGCCATATAGGTGGTGGTAACATCCTCATAGACCACAAAACCTTGAAGAAGGAAGCATTGTCAAAGTACCTGGAAAATTATGACAGCGACTCCATCCAGGCGATTATTTACCAGGTGCAAAACGGCAAAAATGCCATGCCCGCTTTCAAGGACAAGTTGAACCCTCAGGAGATTGTAGAAGTAGCAGCTTACATTTTCCAGAAAGCTGAACAAGGCTGGTGA	MSVEMVFQLLDACCKENLLRIVLLILLTAIAIFKLTFIYPALAVEMPNGAKIFNSNCASCHIGGGNILIDHKTLKKEALSKYLENYDSDSIQAIIYQVQNGKNAMPAFKDKLNPQEIVEVAAYIFQKAEQGW	VEMPNGAKIFNSNCASCHIGGGNILIDHKTLKKEALSKYLENYDSDSIQAIIYQVQNGKNAMPAFKDKLNPQEIVEVAAYIFQKAEQGW
Cytochrome c6D	Fischerella major NIES-592	NIES592_14090	TTGAGAATTCTATTATTAATTTTGCTATTTGCAATCGCGCTGTCATTTTTTATATTTACCAGTCCAGTACAAGCAGCCGAAATATCTGATGCTGCCAAAATATTTAATTCTAACTGTGCTTCTTGTCATATTGGTGGTGGTAATGTTCTCATCGCTGAGAAGACTTTGAAAAAGGAAGCCTTACAACAGTATCTGAAAAATTACGATACTGACTCTATTGCAGCAATTATTCACCAAATACAAAATGGGAAAAACGCCATGCCTGCTTTTAAAAGCAAGTTAAGCAAAGATGAAATTGTCCAAGTAGCTGCTTACGTTTTTCAGAAAGCAGAACAGGGTTGGTAA	MRILLLILLFAIALSFFIFTSPVQAAEISDAAKIFNSNCASCHIGGGNVLIAEKTLKKEALQQYLKNYDTDSIAAIIHQIQNGKNAMPAFKSKLSKDEIVQVAAYVFQKAEQGW	AEISDAAKIFNSNCASCHIGGGNVLIAEKTLKKEALQQYLKNYDTDSIAAIIHQIQNGKNAMPAFKSKLSKDEIVQVAAYVFQKAEQGW
Cytochrome c6D	Fischerella muscicola CCMEE 5323	CEN44_23310	TTGAGAATTCTATTATTTATTTTCCTATTTGCGATCGCTCTGTTAATTTTTATATTTATCAGTCCAGCAGAGGCAGCCGAAATGTCTGATGCTGCCAAAATATTTAATTCTAACTGTGCTTCTTGTCATATTGGTGGTGGTAATATTCTCATCTCTGAGAAAACTTTGAAAAAGGAAGCCTTACAAAAGTATCTGGAAAATTACAACACTAACTCTATTGAAGCGATTATTCATCAAGTACAAAATGGCAAAAACGCTATGCCTGCTTTTAAAAGCAAGTTAAGCGAAGATGAAATTATCCAAGTAGCTGCCTACGTTTTTCAAAAAGCAGAACAGGGTTGGTAA	MRILLFIFLFAIALLIFIFISPAEAAEMSDAAKIFNSNCASCHIGGGNILISEKTLKKEALQKYLENYNTNSIEAIIHQVQNGKNAMPAFKSKLSEDEIIQVAAYVFQKAEQGW	AEMSDAAKIFNSNCASCHIGGGNILISEKTLKKEALQKYLENYNTNSIEAIIHQVQNGKNAMPAFKSKLSEDEIIQVAAYVFQKAEQGW
Cytochrome c6D	Fischerella sp. NIES-3754	FIS3754_10410	TTGAGAATTCTATTATTAATTTTGCTATTTGCAATCGCGCTGTCATTTTTTATATTTACCAGTCCAGTACAAGCAGCCGAAATATCTGATGCTGCCAAAATATTTAATTCTAACTGTGCTTCTTGTCATATTGGTGGTGGTAATGTTCTCATCGCTGAGAAGACTTTGAAAAAGGAAGCCTTACAACAGTATCTGAAAAATTACGATACTGACTCTATTGCAGCAATTATTCACCAAATACAAAATGGGAAAAACGCCATGCCTGCTTTTAAAAGCAAGTTAAGCAAAGATGAAATTGTCCAAGTAGCTGCTTACGTTTTTCAGAAAGCAGAACAGGGTTGGTAA	MRILLLILLFAIALSFFIFTSPVQAAEISDAAKIFNSNCASCHIGGGNVLIAEKTLKKEALQQYLKNYDTDSIAAIIHQIQNGKNAMPAFKSKLSKDEIVQVAAYVFQKAEQGW	AEISDAAKIFNSNCASCHIGGGNVLIAEKTLKKEALQQYLKNYDTDSIAAIIHQIQNGKNAMPAFKSKLSKDEIVQVAAYVFQKAEQGW
Cytochrome c6D	Fischerella sp. NIES-4106	NIES4106_16980	TTGAGACTACTATTATTATTTCTGCTATTTGCGATCGCTCTGTTTATTTTTATATTTACCAGTCCAGCACAGGCGGCCGAAATATCTGGTGCTGCCAAAATATTTGCTTCTAATTGTGCTTCTTGTCATATTGGTGGTGGGAATGTCCTCATCGCTGAGAAAACATTGAGAAAGGAAGCCTTACAAAAGTATCTGGAAAATTATAACGCTGACTCACTTGCAGCAATTATTCACCAGGTGCAAAACGGCAAAAATGCTATGCCTGCTTTTAAAAGCAAGTTAAGCGAAGATGAAATTATCGAAGTAGCTACCTACATTTTTGAAAAAGCAGAACGGGGTTGGTAG	MRLLLLFLLFAIALFIFIFTSPAQAAEISGAAKIFASNCASCHIGGGNVLIAEKTLRKEALQKYLENYNADSLAAIIHQVQNGKNAMPAFKSKLSEDEIIEVATYIFEKAERGW	AEISGAAKIFASNCASCHIGGGNVLIAEKTLRKEALQKYLENYNADSLAAIIHQVQNGKNAMPAFKSKLSEDEIIEVATYIFEKAERGW
Cytochrome c6D	Fischerella thermalis	FJSC11DRAFT_3222	TTGAGAATTCTATTATTAATTTTGCTATTTGCGATCGCGCTGTCATTTTTTATATTTACCAGTCCAGTACAAGCAGCCGAAATATCTGATGCTGCCAAAATATTTAATTCTAACTGTGCTTCTTGTCATATTGGTGGTGGTAATGTTCTCATCGCTGAGAAGACTTTGAAAAAGGAAGCCTTACAACAGTATCTGAAAAATTACGATACTGACTCTATTGCAGCGATTATTCACCAAATACAAAATGGGAAAAACGCCATGCCTGCTTTTAAAAGCAAGTTAAGCGAAGATGAAATTATCCAAGTAGCTGCTTACGTTTTTCAAAAAGCAGAACAGGGTTGGTAA	MRILLLILLFAIALSFFIFTSPVQAAEISDAAKIFNSNCASCHIGGGNVLIAEKTLKKEALQQYLKNYDTDSIAAIIHQIQNGKNAMPAFKSKLSEDEIIQVAAYVFQKAEQGW	AEISDAAKIFNSNCASCHIGGGNVLIAEKTLKKEALQQYLKNYDTDSIAAIIHQIQNGKNAMPAFKSKLSEDEIIQVAAYVFQKAEQGW
Cytochrome c6D	Fischerella thermalis 111/344/542	CA946_11685	TTGAGAATTCTATTATTAATTTTGCTATTTGCGATCGCGCTGTCATTTTTTATATTTACCAGTCCAGTACAAGCAGCCGAAATATCTGATGCTGCCAAAATATTTAATTCTAACTGTGCTTCTTGTCATATTGGTGGTGGTAATGTTCTCATCGCTGAGAAGACTTTGAAAAAGGAAGCCTTACAACAGTATCTGAAAAATTACGATACTGACTCTATTGCAGCGATTATTCACCAAATACAAAATGGGAAAAACGCCATGCCTGCTTTTAAAAGCAAGTTAAGCGAAGATGAAATTATCCAAGTAGCTGCTTACGTTTTTCAAAAAGCAGAACAGGGTTGGTA	MRILLLILLFAIALSFFIFTSPVQAAEISDAAKIFNSNCASCHIGGGNVLIAEKTLKKEALQQYLKNYDTDSIAAIIHQIQNGKNAMPAFKSKLSEDEIIQVAAYVFQKAEQGW	AEISDAAKIFNSNCASCHIGGGNVLIAEKTLKKEALQQYLKNYDTDSIAAIIHQIQNGKNAMPAFKSKLSEDEIIQVAAYVFQKAEQGW
Cytochrome c6D	Hapalosiphon sp. MRB220	AMR41_23275	TTGAGACTACTGTTATTAATTTTGCTATCTGCGATCGCTCTGTTTATTTTTATATTTATCAGTCCAGCACAGGCGGCCGAAATATCTGGTGCTGCCAAAATATTTGCTTCTAACTGTGCTTCTTGTCATATTGGTGGTGGGAATGTCCTCATTGCTGAGAAAACGTTAAGAAAGGAAGCCTTACAAAAGTATCTGGAAGATTATAACGCTAACTCACTTAGAGCAATTATTCACCAAGTACAAAATGGCAAAAATGCTATGCCTGCTTTTAAAAGCAAGTTAAGCGAAGATGAAATTATCGAAGTAGCTACCTACGTTTTTCAGAAAGCAGAACAGGGTTGGTAG	MRLLLLILLSAIALFIFIFISPAQAAEISGAAKIFASNCASCHIGGGNVLIAEKTLRKEALQKYLEDYNANSLRAIIHQVQNGKNAMPAFKSKLSEDEIIEVATYVFQKAEQGW	AEISGAAKIFASNCASCHIGGGNVLIAEKTLRKEALQKYLEDYNANSLRAIIHQVQNGKNAMPAFKSKLSEDEIIEVATYVFQKAEQGW
Cytochrome c6D	Leptolyngbya sp. O-77	O77CONTIG1_01276	ATGAAAAGCGTTAGGTGTGTAGCGGCTGTTATTTTGGCAATTGTTTTGAGCGTCGCCTTTCCCCAGAAGGCTCTTGCGAGTGATTTGGCTCGTGGGGCACAGCTCTTCTCTGCAAACTGTGCTGTATGTCACTTGGGCGGTGGTAACAGCATCATGAGCATTAAAACCCTGAAAAAAGATGCCTTGGAAAAGTTTCTGGCAGGCTACGGCCCGAACCACAACGAGAATGCAATTGTGAAGCAGGTCACCTATGGCAAGGGCATGATGCCAGCTTTCAAAAATCGTCTAACAGAAGATCAAATTGCTGACATTGCAGCTTATGTACAGTCCCAAGCCGAAAAAGACTGGGAGGGATAA	MKSVRCVAAVILAIVLSVAFPQKALASDLARGAQLFSANCAVCHLGGGNSIMSIKTLKKDALEKFLAGYGPNHNENAIVKQVTYGKGMMPAFKNRLTEDQIADIAAYVQSQAEKDWEG	SDLARGAQLFSANCAVCHLGGGNSIMSIKTLKKDALEKFLAGYGPNHNENAIVKQVTYGKGMMPAFKNRLTEDQIADIAAYVQSQAEKDWEG
Cytochrome c6D	Nostoc calcicola FACHB-389	FACHB389_32450	TTGAGAATATTTTTATTAATTTTGCTGTTAGCGATCGCCCTATTCAAATTAACACTCATTAGTCCAGCACTAGCTGCCGAAACGTCCAACGGTGCTAACATTTTCGAGGCTAACTGCGCTTCGTGCCATATCGGTGGCGGTAATATCCTGATTAACCAGAAAACCTTGAAAAAGGAAGCACTGTCAAAGTACCTTGAAAATTATGATAGCGACTCCATTCAGGCAATTATCCACCAAGTGCAAAATGGTAAAAATGCCATGCCTGCCTTTAAAGAAAAGTTAAGTCCTGAGGAAATTCTAGAGGTAGCGGCTTACGTTTTCCAGAATGCAGAACAAGGCTGGTAA	MRIFLLILLLAIALFKLTLISPALAAETSNGANIFEANCASCHIGGGNILINQKTLKKEALSKYLENYDSDSIQAIIHQVQNGKNAMPAFKEKLSPEEILEVAAYVFQNAEQGW	AETSNGANIFEANCASCHIGGGNILINQKTLKKEALSKYLENYDSDSIQAIIHQVQNGKNAMPAFKEKLSPEEILEVAAYVFQNAEQGW
Cytochrome c6D	Nostoc cycadae WK-1	NCWK1_0332	TTGAGAATATTTTTGTTAATGTTATTTCTAGCGATCGCCCTCTTCAAATTAACATTTACTTATCCAGCACTAGCTGCCGAAACATCCAACGGTGCCAAAATCTTCAGCGCCAATTGTTCTTCCTGTCACATAGGCGGCGGTAACATTCTGGTTGCCGAAAAAACTTTAGCCAAAGAAGCATTATCAAAATACTTGGCAGATTATAACACTGACTCCATTCAGGCAATTATTCATCAAGTGCAGAATGGTAAAAATGCCATGCCCCCCTTCAAAAATAAATTAACTTCTGACGAAATTTTGGCTGTAGCTGCTTATGTTTTTCAACAAGCAGAACAAGGTTGGTAG	MRIFLLMLFLAIALFKLTFTYPALAAETSNGAKIFSANCSSCHIGGGNILVAEKTLAKEALSKYLADYNTDSIQAIIHQVQNGKNAMPPFKNKLTSDEILAVAAYVFQQAEQGW	AETSNGAKIFSANCSSCHIGGGNILVAEKTLAKEALSKYLADYNTDSIQAIIHQVQNGKNAMPPFKNKLTSDEILAVAAYVFQQAEQGW
Cytochrome c6D	Nostoc flagelliforme CCNUN1	COO91_04701	TTGAGAATACTTTTATTAATCCTACTGTGGGCGATCGCTCTATTCAAATTAACATTCATTAGTCCAGCACTAGCTGCCGAAATATCCAACGGTGCTAAAATTTTCGAGGCTAACTGCGCTTCTTGCCATATAGGTGGCGGTAATATCCTTATTAGCCAGAAAACCTTGAAAAAGGAAGCATTGTCAAAATACTTAGAAAATTATGATAGCGACTCAATCGAGGCGATTATCCACCAAGTACAAAATGGTAAAAATGCCATGCCTGCCTTTAAAGGCAAATTAAGTTCTGAGGAGATTCTAGAAGTAGCTGCTTACGTTTTTCAGAATGCAGAACAAGGCTGGTAA	MRILLLILLWAIALFKLTFISPALAAEISNGAKIFEANCASCHIGGGNILISQKTLKKEALSKYLENYDSDSIEAIIHQVQNGKNAMPAFKGKLSSEEILEVAAYVFQNAEQGW	AEISNGAKIFEANCASCHIGGGNILISQKTLKKEALSKYLENYDSDSIEAIIHQVQNGKNAMPAFKGKLSSEEILEVAAYVFQNAEQGW
Cytochrome c6D	Nostoc linckia NIES-25	NIES25_16910	GTGGAGGCTTGTTGCGAGGAAATTCTCTTGAGAATACTTTTATTAATTTTGCTGTTAGCGATCGCTTTATTCAACTTAACATTCATCAATCCTGCACTAGCAGCCGAAACATCCGACGGTGCTAAAATTTTCGAGGCTAACTGCGCTTCTTGCCATATCGGTGGCGGTAACATTTTGATCGCAGAGAAAACCTTGAAAAAGGAAGCATTGTCAAAGTACCTAAAAAATTATGATAACGACTCAATCCAAGCGATTATCCACCAAGTACAGAATGGCAAAAATGCCATGCCTGCCTTTAAAGACAAGTTAACTCCTGAGGAAATTTTACAGGTAGCAGCTTACGTTTTTGAGAATGCACAACAAGGCTGGTAA	MEACCEEILLRILLLILLLAIALFNLTFINPALAAETSDGAKIFEANCASCHIGGGNILIAEKTLKKEALSKYLKNYDNDSIQAIIHQVQNGKNAMPAFKDKLTPEEILQVAAYVFENAQQGW	AETSDGAKIFEANCASCHIGGGNILIAEKTLKKEALSKYLKNYDNDSIQAIIHQVQNGKNAMPAFKDKLTPEEILQVAAYVFENAQQGW
Cytochrome c6D	Nostoc linckia z1	VF02_08765	TTGAGAATACTTTCATTAATTTTGCTGTTAGCGATCGCCTTAATCAAACTAACATTCATTAGTCCAGCATTAGCAGCCGAAACATCCAATGGTGCTAAAATCTTCGAGGCAAACTGCGCTTCTTGCCACATCGGTGGTGGTAATGTCCTAATTGCAGAGAAAACCTTGAAAAAAGAAGCATTGTCAAAGTACTTAAAAAATTATGATAACGACTCAATTCAAGCGATTATCCACCAAGTGCACAATGGCAAAAATGCCATGCCTGCCTTTAAAGACAAGTTAAGTTATGAGGAAATTTTACAGGTAGCAGCTTACGTTTTTCAAAATGCCGAACAAGGCTGGTAA	MRILSLILLLAIALIKLTFISPALAAETSNGAKIFEANCASCHIGGGNVLIAEKTLKKEALSKYLKNYDNDSIQAIIHQVHNGKNAMPAFKDKLSYEEILQVAAYVFQNAEQGW	AETSNGAKIFEANCASCHIGGGNVLIAEKTLKKEALSKYLKNYDNDSIQAIIHQVHNGKNAMPAFKDKLSYEEILQVAAYVFQNAEQGW
Cytochrome c6D	Nostoc piscinale CENA21	ACX27_30135	TTGAGAAGATTGTTGTTAATTTTATTTCTAGCGATCGCGCTCTTCCAATTAACATTTACTTATCCAGCACTAGCCGCCGAAACATCCAACGGTGCAAAAATCTTTAGCGCCAATTGCGCTTCTTGTCACATAGGTGGCGGTAACATTCTCGTTGCCGAAAAAACCTTAAACAAAGAAGCATTATCAAAATACTTGGCAGACTATAACACCGACTCCCTTCAAGCAATTATTCATCAAGTCCAAAATGGCAAAAATGCCATGCCCCCCTTCAAAAACAAATTAACCCCTGAAGAAATTTTGGATGTCGCCGCTTACGTTTTTCAAAAAGCCGAACAAGGATGGTAG	MRRLLLILFLAIALFQLTFTYPALAAETSNGAKIFSANCASCHIGGGNILVAEKTLNKEALSKYLADYNTDSLQAIIHQVQNGKNAMPPFKNKLTPEEILDVAAYVFQKAEQGW	AETSNGAKIFSANCASCHIGGGNILVAEKTLNKEALSKYLADYNTDSLQAIIHQVQNGKNAMPPFKNKLTPEEILDVAAYVFQKAEQGW
Cytochrome c6D	Nostoc punctiforme PCC 73102	Npun_R2788	ATGATAGCGATCGCTCTATTCAAATTGACATTCATTAGTCCAGCACTAGCTGCCGAAACATCCAACGGTGCTAAAATTTTCGAGGCTAACTGCGCTTCTTGCCATATAGGTGGCGGTAATATCCTTATTAGCCAGAAAACCTTGAAAAAGGAAGCATTGTCAAAATACCTAGAAAATTATAATAGTGACTCAATCGAGGCGATTATCCACCAAGTGCAAAATGGTAAAAATGCTATGCCTGCCTTTAAAGGAAAGTTAAGTGCTGAAGAGATCCTGGATGTAGCTGCTTACGTTTTTCAGAATGCAGAACAAGGCTGGTAA	MIAIALFKLTFISPALAAETSNGAKIFEANCASCHIGGGNILISQKTLKKEALSKYLENYNSDSIEAIIHQVQNGKNAMPAFKGKLSAEEILDVAAYVFQNAEQGW	AETSNGAKIFEANCASCHIGGGNILISQKTLKKEALSKYLENYNSDSIEAIIHQVQNGKNAMPAFKGKLSAEEILDVAAYVFQNAEQGW
Cytochrome c6D	Nostoc sp. 'Lobaria pulmonaria (5183) cyanobiont'	NLP_4514	TTGTTGAGAATACTTTTATTAATTCTACTGTCGACGATCGCCCTATTCAAATTCACATTCATTAGTCCAGCACTAGCTGCCGAAACATCCAACGGTGCTAAAATTTTCGAGGCTAACTGCGCTTCTTGCCATATAGGTGGCGGTAACATCCTTATCAGCCAGAAAACTTTGAAAAAGGAAGCATTGTCAAAATACCTAGAAAATTACAATCAAGACTCAATCCAGGCGATTATCCACCAAGTGCAAAATGGTAAAAATGCCATGCCTGCCTTTAAAGGCAAGTTAAGTTCTGAGGAGATTCTGGAGGTAGCTGCTTACGTTTTTCACAATGCAGAACAAGGCTGGTAA	MLRILLLILLSTIALFKFTFISPALAAETSNGAKIFEANCASCHIGGGNILISQKTLKKEALSKYLENYNQDSIQAIIHQVQNGKNAMPAFKGKLSSEEILEVAAYVFHNAEQGW	AETSNGAKIFEANCASCHIGGGNILISQKTLKKEALSKYLENYNQDSIQAIIHQVQNGKNAMPAFKGKLSSEEILEVAAYVFHNAEQGW
Cytochrome c6D	Nostoc sp. 'Peltigera membranacea cyanobiont' 210A	CDG76_02195	TTGAGAATACTTTTATTAATTCTACTGTCGGCGATCGTCCTATTCAAATTTACATTCATTAGTCCAGCACTAGCTGCCGAAACATCCAACGGTGCGAAAATTTTCGAGGCTAACTGCGCTTCTTGCCATATAGGTGGCGGTAACATCCTTATCAGCCAGAAAACCTTGAAAAAGGAAGCATTGTCAAAGTACCTAGAAAATTACAATCAAGACTCAATCCAGGCGATTATCCACCAAGTGCAAAATGGTAAAAATGCTATGCCTGCTTTTAAAGACAAGTTAAGTTCTGAGGAGATTCTGGAGGTAGCTGCTTACGTTTTTCAAAATGCGGAACAAGGTTGGTAA	MRILLLILLSAIVLFKFTFISPALAAETSNGAKIFEANCASCHIGGGNILISQKTLKKEALSKYLENYNQDSIQAIIHQVQNGKNAMPAFKDKLSSEEILEVAAYVFQNAEQGW	AETSNGAKIFEANCASCHIGGGNILISQKTLKKEALSKYLENYNQDSIQAIIHQVQNGKNAMPAFKDKLSSEEILEVAAYVFQNAEQGW
Cytochrome c6D	Nostoc sp. 'Peltigera membranacea cyanobiont' 213	CDG77_13110	TTGAGAATACTTTTATTAATTTTAATGTTAGCGATCGCTCTATTCAAATTGACATTCATTAGTCCAGCACTAGCTGCCGAAACATCCAACGGGGCTAAAATTTTCGAGGCTAACTGCGCTTCTTGCCATATAGGTGGCGGCAATATCCTTATTAGCCAGAAAACCTTGAAAAAGGAAGCATTGTCAAAGTACCTAGAAAATTATAATCGCGACTCTATCGAGGCGATTATCCACCAAGTGCAAAATGGTAAAAATGCCATGCCTGCCTTTAAAGAAAAGTTAAGTGCTGAAGAGATTCTGGAGGTAGCTGCTTACGTTTTTCAGAATGCAGAACAAGGCTGGTAA	MRILLLILMLAIALFKLTFISPALAAETSNGAKIFEANCASCHIGGGNILISQKTLKKEALSKYLENYNRDSIEAIIHQVQNGKNAMPAFKEKLSAEEILEVAAYVFQNAEQGW	AETSNGAKIFEANCASCHIGGGNILISQKTLKKEALSKYLENYNRDSIEAIIHQVQNGKNAMPAFKEKLSAEEILEVAAYVFQNAEQGW
Cytochrome c6D	Nostoc sp. 106C	BV375_28245	TTGAGAATACTTTTATTTATACTACTGTTAGCGATCGCTCTATTTAGATTCACATTTACTCTTCCAGCACTAGCTGCTGAAACATCCGATGGAGCCAAAATATTTGATGCTAATTGTTCTTCTTGCCATATAGGTGGCGGTAACATTCTAATTAGCCATAAAACTTTGAAAAAAGATGCATTATCGAATTATTTGGAAAATTATAATCAAGACTCTATTAAAGCAATTATCCACCAGGTTCAGAACGGCAAAAATGCTATGCCCGCCTTCAAAAACAAGTTAAGCAGTGAGGAAATTTTAGAGGTAGCAGCTTACGTTTTCCAGAAAGCAGAAACAGGCTGGTAA	MRILLFILLLAIALFRFTFTLPALAAETSDGAKIFDANCSSCHIGGGNILISHKTLKKDALSNYLENYNQDSIKAIIHQVQNGKNAMPAFKNKLSSEEILEVAAYVFQKAETGW	AETSDGAKIFDANCSSCHIGGGNILISHKTLKKDALSNYLENYNQDSIKAIIHQVQNGKNAMPAFKNKLSSEEILEVAAYVFQKAETGW
Cytochrome c6D	Nostoc sp. ATCC 53789	A6V25_22970	TTGAGAATACTTTTATTAATCTTAATGATAGCGATCGCTCTATTCAAATTTACATTCATTAGTCCAGCACTAGCTGCCGAAATATCCAACGGTGCTAAAGTTTTCGAGGCTAACTGCGCTTCTTGCCATATAGGTGGCGGTAATATCCTTATTAGCCAGAAAACCTTGAAAAAGGAAGCATTGTCAAAATACCTAGAAAATTATGATAGCGACTCAATCGAGGCGATTATCCACCAAGTCCAAAATGGTAAAAATGCTATGCCTGCCTTTAAAGGAAAGTTAAGTGCTGAAGAGATTCTAGAGGTAGCTGCCTACGTTTTTCAGAATGCAGAACAAGGCTGGTAA	MRILLLILMIAIALFKFTFISPALAAEISNGAKVFEANCASCHIGGGNILISQKTLKKEALSKYLENYDSDSIEAIIHQVQNGKNAMPAFKGKLSAEEILEVAAYVFQNAEQGW	AEISNGAKVFEANCASCHIGGGNILISQKTLKKEALSKYLENYDSDSIEAIIHQVQNGKNAMPAFKGKLSAEEILEVAAYVFQNAEQGW
Cytochrome c6D	Nostoc sp. CENA543	CLI64_22740	TTGAGAATAATTTTATTTATATTTTTGGCGATCGCTATAATTAAACTTACATTTACCAGTCCAGTTCTAGCGGCAGAAATATCTTCAGGCGCGAAAATTTTCCAGAATAACTGCTCTGCTTGCCATATAGGCGGCGGTAATATTCTAGTTCCTCAAAAAACCCTGCAAAAAGAAGCTCTATCCAAGTACCTCGCCAACTACAACGAAGACGCTATCCAGGCAATTATTTATCAAGTAGAAAACGGTAAAAATGCTATGCCTGCCTTCAAAAACAAGTTAAGCGAACCAGAAATTCTCGAAGTTGCTGCTTACGTCTTCCAAAAATCAGAGCAAGGCTGGTGA	MRIILFIFLAIAIIKLTFTSPVLAAEISSGAKIFQNNCSACHIGGGNILVPQKTLQKEALSKYLANYNEDAIQAIIYQVENGKNAMPAFKNKLSEPEILEVAAYVFQKSEQGW	AEISSGAKIFQNNCSACHIGGGNILVPQKTLQKEALSKYLANYNEDAIQAIIYQVENGKNAMPAFKNKLSEPEILEVAAYVFQKSEQGW
Cytochrome c6D	Nostoc sp. NIES-3756	NOS3756_22920	TTGAGAATAATTTTATTAATATTACTGTTGGCGATCGCTATATTTAAACTTATATTCACTAATCCAGCCCTAGCTGTCGAACTTCCCACAGGGGCAAAAATTTTTAATAACAACTGTGCTTCCTGCCACATAGGTGGCGGAAACATTCTTATAGCTGAAAAAACCCTCAAAAAAGAAGCATTATCAAAGTACCTGGAGAATTATGACACAAATTCCATCCAGGCCATTATCCACCAGGTACAATACGGCAAAAATGCCATGCCTGCCTTCAAAGACAAGCTAACCAACGAAGAAATTCTAGAAGTCGCTGCTTACGTTTTCCAGAAAGCAGAACAAGATTGGCCAAACCCTGAGAAGGAGGGGTAG	MRIILLILLLAIAIFKLIFTNPALAVELPTGAKIFNNNCASCHIGGGNILIAEKTLKKEALSKYLENYDTNSIQAIIHQVQYGKNAMPAFKDKLTNEEILEVAAYVFQKAEQDWPNPEKEG	VELPTGAKIFNNNCASCHIGGGNILIAEKTLKKEALSKYLENYDTNSIQAIIHQVQYGKNAMPAFKDKLTNEEILEVAAYVFQKAEQDWPNPEKEG
Cytochrome c6D	Nostoc sp. NIES-2111	NIES2111_32870	TTGAGAATAATTTTATTAATATTACTGTTGGCGATCGCTATATTTAAACTTATATTCACTAATCCAGCCCTAGCTGCCGAACTTCCCACAGGGGCAAAAATTTTTAATAACAACTGTGCTTCCTGCCACATAGGTGGCGGAAACATTCTTATAGCTGAAAAAACCCTCAAAAAAGAAGCATTATCAAAGTACCTGGAGAATTATGATACAAATTCCATCCAGTCCATTATCCACCAGGTACAATACGGCAAAAATGCCATGCCTGCCTTCAAAGACAAGCTAACCAACGAAGAAATTCTAGAAGTCGCTGCTTACGTTTTCCAGAAAGCAGAACAAGATTGGCCAAACCCTGAGAAGGAGGGGTAG	MRIILLILLLAIAIFKLIFTNPALAAELPTGAKIFNNNCASCHIGGGNILIAEKTLKKEALSKYLENYDTNSIQSIIHQVQYGKNAMPAFKDKLTNEEILEVAAYVFQKAEQDWPNPEKEG	AELPTGAKIFNNNCASCHIGGGNILIAEKTLKKEALSKYLENYDTNSIQSIIHQVQYGKNAMPAFKDKLTNEEILEVAAYVFQKAEQDWPNPEKEG
Cytochrome c6D	Nostoc sp. PCC 7107	Nos7107_5409	TTGGAACTATATTTATTTAGTCGCTGGAGCCTGGAGAATCACTTGAGAATATTTTTGTTCATGTTATTTCTAGCGATCGCTCTCTTCAAATTAACATTTACTGATCCAGCACTAGCTGCCGAAACATCCAACGGTGCCAAAATCTTCAGCGCCAACTGTTCTTCTTGCCACATAGGCGGCGGTAACATTCTGGTTGCCGAAAAAACTTTAACCAAAGAAGCATTATCAAAATACTTGGCGGATTATAACACTGACTCCATTCAGGCAATTATTCATCAAGTGCAGAATGGTAAAAATGCCATGCCTCCCTTCAAAAATAAATTAACTTCTGAAGAAATTTTGGATGTAGCTGCTTATGTTTTTCAACAAGCAGAACATGGTTGGTAG	MELYLFSRWSLENHLRIFLFMLFLAIALFKLTFTDPALAAETSNGAKIFSANCSSCHIGGGNILVAEKTLTKEALSKYLADYNTDSIQAIIHQVQNGKNAMPPFKNKLTSEEILDVAAYVFQQAEHGW	AETSNGAKIFSANCSSCHIGGGNILVAEKTLTKEALSKYLADYNTDSIQAIIHQVQNGKNAMPPFKNKLTSEEILDVAAYVFQQAEHGW
Cytochrome c6D	Nostoc sp. PCC 7120 = FACHB-418	asl0256	TTGAGAATAATTTTATTACTATTATTTTTGGCGATCGCTATATTTAAACTTACATTTATCAGTCCAGCCCTAGCCGCCGAACTACCAACTGGAGCAAAAATTTTTAATAATAACTGCGCTTCCTGCCACATAGGCGGTGGTAATATACTTATTTCTGAAAAAACACTCAAAAAAGAAGCATTATTAAAGTACCTGGAAGATTATGAGACGAACTCAATCCAGGCCATTATCCATCAGATACAGTATGGCAAAAACGCCATGCCTGCTTTTAAAGACAAATTAAGTACTGAAGAAATTCTAGAAGTGGCTGCTTATATTTTTCAAAAAGCAGAAAAAGACTGGTCAAATCTGGAAAAAGAGGGTTAG	MRIILLLLFLAIAIFKLTFISPALAAELPTGAKIFNNNCASCHIGGGNILISEKTLKKEALLKYLEDYETNSIQAIIHQIQYGKNAMPAFKDKLSTEEILEVAAYIFQKAEKDWSNLEKEG	AELPTGAKIFNNNCASCHIGGGNILISEKTLKKEALLKYLEDYETNSIQAIIHQIQYGKNAMPAFKDKLSTEEILEVAAYIFQKAEKDWSNLEKEG
Cytochrome c6D	Nostoc sp. RF31YmG	BV378_22780	TTGAGAATACTTTTATTTATACTACTGTTAGCGATCGCCCTATTTAGATTCACATTTACTCTTCCAGCACTAGCTGCTGAAACATCCGATGGAGCCAAAATATTTGATGCTAATTGTTCTTCTTGCCATATAGGTGGCGGTAACATTCTGATTAGCCATAAAACTTTGAAAAAAGATGCATTATCGAATTATTTGGAAAATTATAATCAAGACTCTATTAAAGCAATTATCCACCAGGTTCAGAACGGCAAAAATGCTATGCCCGCCTTCAAAAACAAGTTAAGCAGTGAGGAAATTTTAGAGGTAGCAGCTTACGTTTTCCAGAAAGCAGAAACAGGCTGGTAA	MRILLFILLLAIALFRFTFTLPALAAETSDGAKIFDANCSSCHIGGGNILISHKTLKKDALSNYLENYNQDSIKAIIHQVQNGKNAMPAFKNKLSSEEILEVAAYVFQKAETGW	AETSDGAKIFDANCSSCHIGGGNILISHKTLKKDALSNYLENYNQDSIKAIIHQVQNGKNAMPAFKNKLSSEEILEVAAYVFQKAETGW
Cytochrome c6D	Nostoc sp. T09	BV372_24390	TTGAGAATAATTTTATTTATCCTACTGTTGGCGATCGCCCTATTTAGATTCACATTCACTCTTCCAGCATTAGCTGCTGAAACATCCGATGGAGCCAAAATATTTGATGCTAATTGTTCTTCTTGCCATATAGGTGGCGGTAACATTCTAATTAGCCATAAAACTTTGAAAAAAGAGGCATTATCAAATTATTTGGAAAATTATAATCAAGACTCTATTAAAGCAATTATCCACCAGGTACAGAACGGTAAAAATGCTATGCCCGCCTTCAAAAACAAGTTAAGCAGTGAGGAAATTTTAGAGGTAGCAGCTTACGTTTTCCAGAAAGCGGAAACAGGCTGGTAA	MRIILFILLLAIALFRFTFTLPALAAETSDGAKIFDANCSSCHIGGGNILISHKTLKKEALSNYLENYNQDSIKAIIHQVQNGKNAMPAFKNKLSSEEILEVAAYVFQKAETGW	AETSDGAKIFDANCSSCHIGGGNILISHKTLKKEALSNYLENYNQDSIKAIIHQVQNGKNAMPAFKNKLSSEEILEVAAYVFQKAETGW
Cytochrome c6D	Nostoc sphaeroides CCNUC1	GXM_04882	TTGACATTCATTAGTCCAGCACTAGCTGCCGAAATATCCAACGGCGCTAAAATTTTCGAGGCTAACTGCGCTTCTTGCCATATAGGTGGCGGTAATATCCTTATTAGCCAGAAAACCTTGAAAAAGGAAGCATTGTCAAAGTACTTAGAAAATTATGATAGCGACTCAATCGAGGCGATTATCCACCAAGTACAAAATGGTAAAAATGCCATGCCTGCCTTTAAAGGCAAGTTAAGTTCTGAGGAGATTCTGGAGGTAGCTGCTTACGTTTTTCAGAATGCAGAACAAGGCTGGTAA	MTFISPALAAEISNGAKIFEANCASCHIGGGNILISQKTLKKEALSKYLENYDSDSIEAIIHQVQNGKNAMPAFKGKLSSEEILEVAAYVFQNAEQGW	AEISNGAKIFEANCASCHIGGGNILISQKTLKKEALSKYLENYDSDSIEAIIHQVQNGKNAMPAFKGKLSSEEILEVAAYVFQNAEQGW
Cytochrome c6D	Planktothrix agardhii CCAP 1459/11A	PA905_25580	TTGAAAAAGCTATTATCAGTCCTTATTTTAAGTTTTCTATTATTAACATTCCTTTTGCGCGAACCCGCATTAGCAGAAGGAGTTTTAAGTGGGTCTACCATTTTTTCTAACTCCTGTGCAGCTTGCCATATTAACGGAAATAACGTTATAGTTGCTAATAAAACTCTAAAAAAAAAAGCGTTAACTAAATACTTAAAAGGATATGAAGAAAATCCTCTGGCTGCAATTATTAATCAAGTTACCAATGGTAAAAATGCCATGCCTAATTTTAAAAGTCGATTAACGGCTAGAGAAATTACCACCGTTGCTGCCTATGTTGCTGAACAAGCTGAAAAGGCATGGTCGCCATTACAATAA	MKKLLSVLILSFLLLTFLLREPALAEGVLSGSTIFSNSCAACHINGNNVIVANKTLKKKALTKYLKGYEENPLAAIINQVTNGKNAMPNFKSRLTAREITTVAAYVAEQAEKAWSPLQ	EGVLSGSTIFSNSCAACHINGNNVIVANKTLKKKALTKYLKGYEENPLAAIINQVTNGKNAMPNFKSRLTAREITTVAAYVAEQAEKAWSPLQ
Cytochrome c6D	Planktothrix paucivesiculata PCC 9631	PL9631_560042	TTGAAAAAGCTATTATCAGTCTTTATTTTAAGTTTTCTATTATTAACATTCCTTTTGTCTAAATCCGCATTAGCAGAAGGAATTTTAAGTGGGTCTACCATTTTTTCCAACTCCTGTGCAGCCTGCCATATTAACGGGAATAACGTAATTGTTGCTAATAAAACCTTGAAAAAAGAAGCGTTGATTAAATACTTAAAAGGATATGAAGAAAACCCTCTAGCTATAATTATTAATCAAGTCACCAATGGTAAAAATGCTATGCCTGCGTTTAAAAGTCGGTTAACGGCTAGGGAAATTACCACCGTTGCCGCCTATGTTGTCGAACAAGCTGAAAAGGCATGGTCGCCATTAGAATAA	MKKLLSVFILSFLLLTFLLSKSALAEGILSGSTIFSNSCAACHINGNNVIVANKTLKKEALIKYLKGYEENPLAIIINQVTNGKNAMPAFKSRLTAREITTVAAYVVEQAEKAWSPLE	EGILSGSTIFSNSCAACHINGNNVIVANKTLKKEALIKYLKGYEENPLAIIINQVTNGKNAMPAFKSRLTAREITTVAAYVVEQAEKAWSPLE
Cytochrome c6D	Planktothrix serta PCC 8927	PL8927_600213	TTGAAAAAACTATTATCAGTCCTTATTTTAGGTTTTGTATTGTTAACACTACAACTTCCTAAACCTGCATTAGCACAAGAGGCTTTAAGTGGATCTCAAATTTTTTCTAACTCCTGTGCAGCCTGTCATATTAATGGAAATAACGTGGTCGTTGCCAATAAAACCTTGAAAAAGGAAGCCTTGATCAAATACTTAAAGGGATATGAAGAAGATGGTCAAGGAGCCATTATCAATCAAGTCACGAAGGGAAAAAATGCAATGCCAGCCTTTAAAAATCGGTTAACGCATGAAGAGATTAAAAGCGTTGCAGCCTATGTTTATAAACAGTCTGAAAAAGGATGGCAGAACTGA	MKKLLSVLILGFVLLTLQLPKPALAQEALSGSQIFSNSCAACHINGNNVVVANKTLKKEALIKYLKGYEEDGQGAIINQVTKGKNAMPAFKNRLTHEEIKSVAAYVYKQSEKGWQN	QEALSGSQIFSNSCAACHINGNNVVVANKTLKKEALIKYLKGYEEDGQGAIINQVTKGKNAMPAFKNRLTHEEIKSVAAYVYKQSEKGWQN
Cytochrome c6D	Planktothrix sp. PCC 11201	PL11201_120003	TTGAAAAAGCTCTTATCAGTCCTTATTTTGAGTTTTCTATTGTTAACAGTCCTTTTGTCCAAACCTGCATTAGCAGAAGGGGTTTTAAGTGGGTCTACCATTTTTTCCAACTCCTGTGCGGCTTGCCATATTAACGGAAATAACGTTATAGTTGCTAACAAAACGCTGAAAAAAGAAGCATTGATTAAATACTTAAAAGGATACGAAGAAAATCCTCTGGCTGCAATTATTAACCAAGTCACCAATGGTAAAAATGCGATGCCAGCTTTTAAAAGTCGGTTAACTTCCAGAGAAATTACCACCGTTGCTGCCTATGTTGCTGAACAGGCTGAAAAGGCATGGTCGCCATTGGAATAA	MKKLLSVLILSFLLLTVLLSKPALAEGVLSGSTIFSNSCAACHINGNNVIVANKTLKKEALIKYLKGYEENPLAAIINQVTNGKNAMPAFKSRLTSREITTVAAYVAEQAEKAWSPLE	EGVLSGSTIFSNSCAACHINGNNVIVANKTLKKEALIKYLKGYEENPLAAIINQVTNGKNAMPAFKSRLTSREITTVAAYVAEQAEKAWSPLE
Cytochrome c6D	Planktothrix tepida PCC 9214	PL9214500504	GTGTTACCAGTTGCCTATTTCGGATTCAAGGAGATTCAATTGAAAAAATTATTATCAGTTTTTATTCTAGGTTTTGTATTGTTAACGTTAATCCTACCTCAACCTGTATTAGCAGAAGAGGCGTTAAATGGATCTCAAATTTTTTCTAATTCCTGTGCTGCCTGCCATATTAATGGAAATAATGTGGTTGTTGCTAATAAAACTTTAAAAAAAGAAGCTTTGGTTAAATACCTAAAAGGATATGAAGAAGATGCTCAAGCCGCAATTGTCAATCAAGTAACCAATGGTAAAAATGCGATGCCTGCCTTTAAAAATCGGTTAACGGCTGAACAAATTAAAACCGTTGCTGATTATGTTGCTACACAAGCAGAAAAGGGATGGTTAAGTTCCCCCTCTCAA…	MLPVAYFGFKEIQLKKLLSVFILGFVLLTLILPQPVLAEEALNGSQIFSNSCAACHINGNNVVVANKTLKKEALVKYLKGYEEDAQAAIVNQVTNGKNAMPAFKNRLTAEQIKTVADYVATQAEKGWLSSPSQTEGRPDVEKSGELN	EEALNGSQIFSNSCAACHINGNNVVVANKTLKKEALVKYLKGYEEDAQAAIVNQVTNGKNAMPAFKNRLTAEQIKTVADYVATQAEKGWLSSPSQTEGRPDVEKSGELN
Cytochrome c6D	Raphidiopsis brookii D9	CRD_02789	TTGTCTAGACCTCTACCGTTATTAGTTTTAATTCTAGCGATCGCCCTATTTTTTAGCTTCACACTTATTATCGAACCAGTCTTATCAGCAGAAATAAGTAGAGGTCATGCAATTTTTAATGCCGAATGTGCTTCCTGCCATGTAGGGGGTGGTAACATACTTGTTCAAAATAAGACTCTACAAACATCAGCTATGAAAAAATACTTAGAAAACTATGATACTGACCCTATTGGAGGAATTGTGAATCAAATTCAGAATGGGAAAAGTGCCATGCCTGCTTTTAAAAACAAATTAACCAAAGAAGAAATTCTAGAGGTGGGTCTCTATGTTTTTCAAATGGCAGAAACAGGATGGTAG	MSRPLPLLVLILAIALFFSFTLIIEPVLSAEISRGHAIFNAECASCHVGGGNILVQNKTLQTSAMKKYLENYDTDPIGGIVNQIQNGKSAMPAFKNKLTKEEILEVGLYVFQMAETGW	AEISRGHAIFNAECASCHVGGGNILVQNKTLQTSAMKKYLENYDTDPIGGIVNQIQNGKSAMPAFKNKLTKEEILEVGLYVFQMAETGW
Cytochrome c6D	Scytonema hofmannii PCC 7110	WA1_39045	TTGAAAAAAGTGTTATTGGTTGTGTTCGCGATCGCCCTATCAGTTATATTTACGTTTACAAGTTCAGTCCTTGCAGCCGAAACGTCCAATGGTGCTCAAATTTTTAAAGATAACTGTGCTTCTTGTCATATAGGTGGAGGAAACATCCTCATTGCCGAAAAAACTCTGAAAAAGGAAGCTTTATTAAGTTATCTGGAAAATTATGAAAGCGATTCCATTCAAGCCATTGTTTATCAGGTACAAAATGGCAAAAATGCTATGCCCGCTTTTAAAGGGAAATTAAGCGAATCAGAAATTTTACAGGTTGCGGCTTACGTTTTCCAAAAAGCCGAACAAGGTTGGTAA	MKKVLLVVFAIALSVIFTFTSSVLAAETSNGAQIFKDNCASCHIGGGNILIAEKTLKKEALLSYLENYESDSIQAIVYQVQNGKNAMPAFKGKLSESEILQVAAYVFQKAEQGW	AETSNGAQIFKDNCASCHIGGGNILIAEKTLKKEALLSYLENYESDSIQAIVYQVQNGKNAMPAFKGKLSESEILQVAAYVFQKAEQGW
Cytochrome c6D	Scytonema sp. HK-05	NIES2130_18950	TTGAGAATAGTTTTATCTGTCGTTTTCTTGGCGATCGCCCTGTTCCAATTTACATTTCTTGATTTAGCATTTGCAGCCGAAGTATCTAATGGTGCCAAAATCTTTAACGCTAACTGCGCTTCTTGTCACATAGGTGGTGGTAACATCCTCATTGCTGAAAAAACTTTGAAAAAGGAAGCTTTATCAAAGTACCTGGAAGATTATGATGCAGACTCGATTCAAGCGATTATCTACCAGGTGCAAAATGGTAAAAATGCTATGCCCTCATACAAGAGTAAGTTAAACGAACAGGAGATTCTAGAAGTCGCTGCTTACGTTTTCCAAAAAGCGGAACAAGGCTGGCAAGATAGCTAA	MRIVLSVVFLAIALFQFTFLDLAFAAEVSNGAKIFNANCASCHIGGGNILIAEKTLKKEALSKYLEDYDADSIQAIIYQVQNGKNAMPSYKSKLNEQEILEVAAYVFQKAEQGWQDS	AEVSNGAKIFNANCASCHIGGGNILIAEKTLKKEALSKYLEDYDADSIQAIIYQVQNGKNAMPSYKSKLNEQEILEVAAYVFQKAEQGWQDS
Cytochrome c6D	Sphaerospermopsis reniformis	SR1949_24960	TTGAGAATACCTTTATTAATTTTACTGTTGGCGATCGCCCTCTTATTTAACTTTCAATTCATTGATCCCGCCTTAGCCGCAGAAGCATCTACAGGCAGCGCCATTTTTAGTAATCACTGTGCTTCTTGCCATATAGGAGGCGCTAATATCCTAGTTGAGCATAAAACTTTACAAAAATCAGCACTATCAAAATATTTAGAAAATTATGATACCGAACCTATTCAAACCATTATCCATCAAATTCAGAACGGTAAAAGTGCCATGCCCGCCTTCAAGAGCAAATTAAGCGAGCAGGAAATTCTAGAAGTGGCCGCTTATGTTTTCCAGAAAGCGGAAACAGGCTGGTAG	MRIPLLILLLAIALLFNFQFIDPALAAEASTGSAIFSNHCASCHIGGANILVEHKTLQKSALSKYLENYDTEPIQTIIHQIQNGKSAMPAFKSKLSEQEILEVAAYVFQKAETGW	AEASTGSAIFSNHCASCHIGGANILVEHKTLQKSALSKYLENYDTEPIQTIIHQIQNGKSAMPAFKSKLSEQEILEVAAYVFQKAETGW
Cytochrome c6D	Synechococcus sp. A15-44	SynA1544_02446	ATGCGTCACCTTTTTTCTCTCGCGCTGGCCGCTTTGATCGCTCTTGTTGCCCCATCCATGGCATCCGCTGCTGATGCAGCGCATGGCGAGCAGATCTTCTCTGCCAACTGCGCTGCATGTCATATGGGTGGAGGCAACGTTGTTAACGGTCAACGCACGCTCCAACAAGACGATCTCAAGGCTTACCTCGCCAACTACAACGAAGGCCATGAAGAGGCCATCACTTACCAGGTGACCAACGGCAAAAACGGCATGCCTGCATTCGGAGCCAAGCTCAGCGCAGATGACATTGCGGATGTAGCCGCCTACGTGGAATCCCAATCGATCAACGGCTGGGCCTGA	MRHLFSLALAALIALVAPSMASAADAAHGEQIFSANCAACHMGGGNVVNGQRTLQQDDLKAYLANYNEGHEEAITYQVTNGKNGMPAFGAKLSADDIADVAAYVESQSINGWA	ADAAHGEQIFSANCAACHMGGGNVVNGQRTLQQDDLKAYLANYNEGHEEAITYQVTNGKNGMPAFGAKLSADDIADVAAYVESQSINGWA
Cytochrome c6D	Synechococcus sp. A15-60	SynA1560_01259	ATGCTGAACCCCTTCCCTGTGTTGGCCTTGATTCTCAGCCTATGCATCGGCTTGATGACGGCCCTTCCAGTGACGGCAGCTCTGGATGCTGACGTCGAGCATGGGGCACAGCTGTTTTCCGCCAACTGCGCGGCTTGCCATATGGGTGGTGGCAATGTGATTCGCGCCAGTCGAACCCTCAGCCAGCAGGACCTCCAAGCCCACCTGGAGTCATACCTGCAGGACCCAATCGAAGCTATCGAGACCCAAATCGAAAATGGCAGAAACGCCATGCCGGCCTTCGAGGGCAAGTTGAGCGCCACCGATATCGATGACGTCGCCGCCTTCGTAGAACGCCAAGCGGAGAAGGGTTGGTCGCGATGA	MLNPFPVLALILSLCIGLMTALPVTAALDADVEHGAQLFSANCAACHMGGGNVIRASRTLSQQDLQAHLESYLQDPIEAIETQIENGRNAMPAFEGKLSATDIDDVAAFVERQAEKGWSR	ADVEHGAQLFSANCAACHMGGGNVIRASRTLSQQDLQAHLESYLQDPIEAIETQIENGRNAMPAFEGKLSATDIDDVAAFVERQAEKGWSR
Cytochrome c6D	Synechococcus sp. A15-62	SynA1562_01035	ATGGCACGCCTATCAGGCCTGATGCTGACGTTGCTGTTGATCGTTGGCGCAACAGGTCTGCTGTCTGCTCCGGTGATGGCGATGGACACGATGGAAAGCTCCGCCTTGGAGCGAGGTGAGCAGATTTTCAACAGCAACTGTGCGGCCTGTCACATGGGGGGCGGCAATGTGATCCGCGCCAACCGAACGCTGAAGATCAGCGACTTGAACGAGCATGTGGAGGCCTACTCCAGCTCCCCGCTGGAAGCCCTGGAACATGAGATCGAGGATGGGCTGAATGCAATGCCCAGCTATGCCGACAAACTGAGTGAGGAGGAGATCATGGCGGTTGCCACCTACGTTGAACAACGGGCCGAATTGGGCTGGTCCAGGCGATGA	MARLSGLMLTLLLIVGATGLLSAPVMAMDTMESSALERGEQIFNSNCAACHMGGGNVIRANRTLKISDLNEHVEAYSSSPLEALEHEIEDGLNAMPSYADKLSEEEIMAVATYVEQRAELGWSRR	SALERGEQIFNSNCAACHMGGGNVIRANRTLKISDLNEHVEAYSSSPLEALEHEIEDGLNAMPSYADKLSEEEIMAVATYVEQRAELGWSRR
Cytochrome c6D	Synechococcus sp. BMK-MC-1	SynBMKMC1_00889	ATGCTGAACCCCACCCCTTTCCTGGCCTTGCTTCTCTGCATGGGCTTGAGCCTGATCGCTGCATGGCCTGCCAGTGCTCTGAGCAGTCCAGATCCCGAGCATGGCGCCCAGCTGTTCTCGGCCAACTGCGCGGCCTGCCATATGGGTGGTGGCAATGTGATCAGCGCAAGCCGAACCTTGAGCCAAACCGATCTGCAAGCCCATCTGGAGTCCTACGGCATGGACCCACTGGAGGCCATCGAGCATCAGATCGAAAACGGCAAAAACGCCATGCCTGCCTACGAAGGCAAGCTCAGTGATCAAGACATTGCTGATGTCGCGGCCTACGTGGAGAGCCAGGCCGAACAGGGCTGGTCCCGATGA	MLNPTPFLALLLCMGLSLIAAWPASALSSPDPEHGAQLFSANCAACHMGGGNVISASRTLSQTDLQAHLESYGMDPLEAIEHQIENGKNAMPAYEGKLSDQDIADVAAYVESQAEQGWSR	PDPEHGAQLFSANCAACHMGGGNVISASRTLSQTDLQAHLESYGMDPLEAIEHQIENGKNAMPAYEGKLSDQDIADVAAYVESQAEQGWSR
Cytochrome c6D	Synechococcus sp. BS55D	CWE16_04215	ATGCGCATTCTTGTTGGTGCTGTTTTCGCCCTGTTGATCGGTCTGCTCTCCCCGATTGCGACCTTCGCAGCTGATGCTGCCCACGGTGCTCAGATCTTCTCCGCCAATTGCGCCGCCTGCCACATCGGTGGTGGCAACGTGGTGAACGGTCAGCGCACTCTTCAACAGGCTGATTTGGATGCCTATCTCGCCAACTACGGCAGTGGCCATGAGAGCGCCATTGCCTATCAGGTGACCAACGGCAAGAACGCCATGCCTGCGTTTGGTGGCAAGCTCAGTGAGACTGATATCGCTGATGTGGCGGCCTACGTCGATCAACAGGCTGGCAACGGCTGGAGCTGA	MRILVGAVFALLIGLLSPIATFAADAAHGAQIFSANCAACHIGGGNVVNGQRTLQQADLDAYLANYGSGHESAIAYQVTNGKNAMPAFGGKLSETDIADVAAYVDQQAGNGWS	ADAAHGAQIFSANCAACHIGGGNVVNGQRTLQQADLDAYLANYGSGHESAIAYQVTNGKNAMPAFGGKLSETDIADVAAYVDQQAGNGWS
Cytochrome c6D	Synechococcus sp. CC9311	sync_1742	ATGGGGCGTCATTTGATCGAAAATAATGCGTCATCAACTCGAGTCATGCGTCACATTATTTCAGTCGCTTTGGTTGCCCTCATTGGCCTCATCATGCCCTCGTTTGCTCTTGCAGCAGATGTTGCCCATGGAGAACAGGTGTTTTCTGCCAATTGCGCTGCATGCCACATGGGCGGAGGCAATGTGGTGAATGGCCAGCGCACCTTGAAGCAGGATGACCTGAAGGCTTACTTGTCTGATTACAACGATGGCCATGAGTCTGCCATCGCTCACCAAGTCACCAACGGTAAAAACGGTATGCCAGCCTTTGGCTCCAAACTTGGCAGTGACGATATCAGTGATGTTGCAGCTTATGTTGAATCTCAATCAGTAAAAGGCTGGGCTTGA	MGRHLIENNASSTRVMRHIISVALVALIGLIMPSFALAADVAHGEQVFSANCAACHMGGGNVVNGQRTLKQDDLKAYLSDYNDGHESAIAHQVTNGKNGMPAFGSKLGSDDISDVAAYVESQSVKGWA	ADVAHGEQVFSANCAACHMGGGNVVNGQRTLKQDDLKAYLSDYNDGHESAIAHQVTNGKNGMPAFGSKLGSDDISDVAAYVESQSVKGWA
Cytochrome c6D	Synechococcus sp. CC9311	sync_1890	ATGCTCACCGGGCTCTTTTTTTGTCGACCGAAATGGATAGGGTTTAAGAAAGAGAAGCTGATGGTGATGCTCAATCCCATTTCCCTGTTCGCCTTGATACTTTGCATCAGCCTCAACCTGTTAGGAGTCTCACCTGCCTCTGCGGCGAGCAGTCCCAGCGGTGACCTTGACCATGGTGGACAACTGTTTTCTGCAAATTGTGCTGCCTGCCATATGGGTGGAGGCAATGTGATCAGCGCATCCAGAACGTTGAGTCAGAGCGATCTGCAAGCACATCTCAACGAGTACGGCGACGACCACCTGGAAGCCATCGAACACCAAATTGAGAAAGGTAAAAATGCAATGCCATCGTTCGTTGGGAAACTCAGCGAGCAAGACATTCTTGATGTCGCCGCTTAC…	MLTGLFFCRPKWIGFKKEKLMVMLNPISLFALILCISLNLLGVSPASAASSPSGDLDHGGQLFSANCAACHMGGGNVISASRTLSQSDLQAHLNEYGDDHLEAIEHQIEKGKNAMPSFVGKLSEQDILDVAAYVELKAEKGWQR	GDLDHGGQLFSANCAACHMGGGNVISASRTLSQSDLQAHLNEYGDDHLEAIEHQIEKGKNAMPSFVGKLSEQDILDVAAYVELKAEKGWQR
Cytochrome c6D	Synechococcus sp. KORDI-52	KR52_11970	ATGGCACGCCTACCAGGGCTGATCCTGACGTTGATGTTGATCATTGGTGCGACAGGGCTGCTTGCGGCTCCGGCCACAGCGGTCGACAGCCCTGCTTTGGAGCGAGGAGAGCAGATTTTCAACAGCAACTGTGCGGCTTGCCACATGGGGGGCGGCAATGTGATTCGCGCCAACCGGACGCTGAAGATCAGCGACCTGAACGACCACTTGGAGGCCTACTCCAAGTCCCCGCTGGAGGCCCTGGAGCAGGAGATCGAGGATGGGCTGAATGCCATGCCCAGCTATGCCGACACACTGAGCGAAGAGGAGATCGTTGCGGTGGCCACCTACGTTGAACAGCGGGCCGAATTGGGCTGGTCCAGGCGATGA	MARLPGLILTLMLIIGATGLLAAPATAVDSPALERGEQIFNSNCAACHMGGGNVIRANRTLKISDLNDHLEAYSKSPLEALEQEIEDGLNAMPSYADTLSEEEIVAVATYVEQRAELGWSRR	PALERGEQIFNSNCAACHMGGGNVIRANRTLKISDLNDHLEAYSKSPLEALEQEIEDGLNAMPSYADTLSEEEIVAVATYVEQRAELGWSRR
Cytochrome c6D	Synechococcus sp. MEDNS5	SynMEDNS5_00806	ATGCTGAACCCCATGTCCTTGCTGGCCTTGCTTCTCAGCATTGGCTTGAGCCTGATGGGCGCACTCCCTGCCAGTGCTCTGAGCAGTCCAGATCCAGAGCATGGCGCCCAGCTGTTCTCTGCCAACTGCGCGGCATGCCATATGGGTGGTGGCAATGTCATCAGCGCAAGCCGCACCCTGAGCCAGACTGACCTGCAAGCCCATCTGGAGTCCTACGGCATGGACCCGCTGGAGGCAATCGAACATCAGATCGAGAACGGCAAGAACGCCATGCCTGCCTACGAAGGCAAGCTCAGTGACAAGGACATCGAGGATGTCGCTGCTTACGTGGAGATCCAGGCCGAACAGGGCTGGTCTCGATGA	MLNPMSLLALLLSIGLSLMGALPASALSSPDPEHGAQLFSANCAACHMGGGNVISASRTLSQTDLQAHLESYGMDPLEAIEHQIENGKNAMPAYEGKLSDKDIEDVAAYVEIQAEQGWSR	PDPEHGAQLFSANCAACHMGGGNVISASRTLSQTDLQAHLESYGMDPLEAIEHQIENGKNAMPAYEGKLSDKDIEDVAAYVEIQAEQGWSR
Cytochrome c6D	Synechococcus sp. MVIR-18-1	SynMVIR181_02040	ATGTCCCTGTTCGCATTGCTGCTTTGCATCGGCCTCAACCTGTTGGGAGTCTCACCTGCAGTTGCGGTGGCCAGCACTTCTGGCGTTGACGTCGAACATGGTGGGCAACTCTTTTCTGCGAATTGCGCTGCATGCCACATGGGTGGTGGCAATGTGATCAGTGCCTCCAGAACATTGAGTCAAAGGGATCTTCAAGCTCATCTCAATGAGTACGGCGACGATCACATTGAGGCCATCGAGCACCAAATTGAAAATGGAAAGAATGCGATGCCCTCGTTTGAAGGAAAATTGAGCGAACAAGACATCATTGATGTAGCCGCCTACGTAGAACTCAAGGCTGAAAAAGGCTGGCAGCGATGA	MSLFALLLCIGLNLLGVSPAVAVASTSGVDVEHGGQLFSANCAACHMGGGNVISASRTLSQRDLQAHLNEYGDDHIEAIEHQIENGKNAMPSFEGKLSEQDIIDVAAYVELKAEKGWQR	VDVEHGGQLFSANCAACHMGGGNVISASRTLSQRDLQAHLNEYGDDHIEAIEHQIENGKNAMPSFEGKLSEQDIIDVAAYVELKAEKGWQR
Cytochrome c6D	Synechococcus sp. NOUM97013	SynNOUM97013_01924	ATGCTGAACCCTTTCCCCGCGTTAGCCGTGATTCTCAGCCTGTGCATCGGCTTGATGACGGCGCTTCCAGCGACGGCAGCGATCGATGCCGACGTGGAGCATGGGGCACAGCTGTTTTCCGCCAACTGCGCGGCCTGCCATATGGGCGGAGGCAATGTGATCCGCGCCAGTCGGACGCTCAGCCAACAGGATCTCCAAGCCCATCTGGAGTCTTACCTGCAAGACCCGATCGAAGCCATCGAGTACCAAATCGAAAATGGCAGAAACGCCATGCCGGCCTTTGAGGGCAAGCTGAGCGCCAGCGATATCGATGACGTCGCAGCATTTGTGGAACGCCAGGCAGAAAAGGGTTGGTCAAGATGA	MLNPFPALAVILSLCIGLMTALPATAAIDADVEHGAQLFSANCAACHMGGGNVIRASRTLSQQDLQAHLESYLQDPIEAIEYQIENGRNAMPAFEGKLSASDIDDVAAFVERQAEKGWSR	ADVEHGAQLFSANCAACHMGGGNVIRASRTLSQQDLQAHLESYLQDPIEAIEYQIENGRNAMPAFEGKLSASDIDDVAAFVERQAEKGWSR
Cytochrome c6D	Synechococcus sp. PROS-7-1	SynPROS71_00867	ATGCTGAACCCCAAGTCCTTGCTGGCCTTGCTTCTCAGCATTGGCTTGAGCCTGATGGGCGCATTCCCTGCCAGTGCACTGAGCAATCCAGATCCCGAGCATGGCGCCCAGCTCTTTTCCGCCAACTGCGCGGCATGCCATATGGGTGGTGGCAATGTGATCAGCGCAAGCCGCACCCTGAGCCAGACTGACCTCCAAGCCCATCTGGAGTCCTACGGCATGGACCCGCTGGAGGCGATCGAACATCAGATCGAGAACGGCAAGAACGCCATGCCTGCCTACGAAGGCAAGCTCAGTGACCAAGACATCGCAGATGTCGCGGCTTACGTGGAGAGCCAGGCGGAACAGGGCTGGTCCCGATGA	MLNPKSLLALLLSIGLSLMGAFPASALSNPDPEHGAQLFSANCAACHMGGGNVISASRTLSQTDLQAHLESYGMDPLEAIEHQIENGKNAMPAYEGKLSDQDIADVAAYVESQAEQGWSR	PDPEHGAQLFSANCAACHMGGGNVISASRTLSQTDLQAHLESYGMDPLEAIEHQIENGKNAMPAYEGKLSDQDIADVAAYVESQAEQGWSR
Cytochrome c6D	Synechococcus sp. PROS-9-1	SynPROS91_01821	ATGCCCAAGTCCATTTCCGTGTTCGCATTGGTGCTCAGCATCAGCCTCAATCTGTTGGGAGTTTCAGCTGCATTTGCGGCCAGCACTCCTGCCGTTGACCTCGAACATGGAGGCCAGCTCTTTTCTGCGAATTGTGCGGCATGTCATATGGGTGGTGGCAACGTGATCAGTGCATCCAGAACGTTGAGTCAAAGCGATCTGCAAGCTCATCTCAATGAGTACGGCGACGATCACATTGAAGCCATCGAGCACCAAATTGAAAATGGAAAAAATGCGATGCCCTCGTTTGTAGGAAAGTTGAGCGAGCAAGATATTATTGATGTAGCCGCCTACGTAGAACTGAAGGCTGAGAAAGGCTGGCAGCGATGA	MPKSISVFALVLSISLNLLGVSAAFAASTPAVDLEHGGQLFSANCAACHMGGGNVISASRTLSQSDLQAHLNEYGDDHIEAIEHQIENGKNAMPSFVGKLSEQDIIDVAAYVELKAEKGWQR	VDLEHGGQLFSANCAACHMGGGNVISASRTLSQSDLQAHLNEYGDDHIEAIEHQIENGKNAMPSFVGKLSEQDIIDVAAYVELKAEKGWQR
Cytochrome c6D	Synechococcus sp. PROS-U-1	SynPROSU1_01193	ATGGCACGCGCTGCAGGCCTGATCCTGACGCTTTTGTTGCTCGTCGGTTCGAGTGAACTGCTGTCAGCACCGGCGATGGCGTTTGAAAGCTCAGCCTTGGAGCAGGGAGAGCAGATTTTCAACAGCAACTGTGCGGCTTGTCACATGGGTGGCGGCAATGTGATTCGCGCCAACCGAACGCTCAAGATCAGCGATCTGAACGCCCATGTCGATGCCTACGCGAACACCCCTTTGGAAGCTCTTGAGCATGAAATCGAGGACGGCCTCAATGCAATGCCCGGATATGCCGACAAACTGAGTGAAGAGGAGATCATTGCGGTGGCCACCTACGTCGAACAACGGGCCGAATTGGGCTGGTAA	MARAAGLILTLLLLVGSSELLSAPAMAFESSALEQGEQIFNSNCAACHMGGGNVIRANRTLKISDLNAHVDAYANTPLEALEHEIEDGLNAMPGYADKLSEEEIIAVATYVEQRAELGW	SALEQGEQIFNSNCAACHMGGGNVIRANRTLKISDLNAHVDAYANTPLEALEHEIEDGLNAMPGYADKLSEEEIIAVATYVEQRAELGW
Cytochrome c6D	Synechococcus sp. ROS8604	SynROS8604_02551	ATGCTCCATCCCATGTCTCTGTTCGCATTGCTGCTTTGCATTGGCCTCAACCTGTTGGGAGTCTCACCTGCAATTGCGGCCAGCACTTCTGGCGTTGACGTCGAACATGGTGGGCAACTCTTTTCTGCGAATTGCGCTGCATGTCACATGGGTGGTGGCAATGTGATCAGTGCGTCCAGAACATTGAGTCAAAGCGATCTTCAAGCGCATCTCAATGAGTACGGCGACGATCACATTGAGGCCATCGAGCACCAAATTGAAAATGGGAAGAATGCGATGCCTTCGTTTGAAGGAAAATTAAGCGAACAAGACATCATTGATGTAGCCGCCTACGTAGAACTCAAGGCTGAAAAAGGCTGGCAGCGATGA	MLHPMSLFALLLCIGLNLLGVSPAIAASTSGVDVEHGGQLFSANCAACHMGGGNVISASRTLSQSDLQAHLNEYGDDHIEAIEHQIENGKNAMPSFEGKLSEQDIIDVAAYVELKAEKGWQR	VDVEHGGQLFSANCAACHMGGGNVISASRTLSQSDLQAHLNEYGDDHIEAIEHQIENGKNAMPSFEGKLSEQDIIDVAAYVELKAEKGWQR
Cytochrome c6D	Synechococcus sp. RS9902	SynRS9902_02023	ATGGCACGCCTATCAGGCCTGATGCTGACGTTGCTGTTGATCGTTGGCGCAACAGGTCTGCTGTCTGCTCCGGTGATAGCGATGGACACGATCGAAAGCTCCGCCTTGGAGCGAGGTGAGCAGATTTTCAACAGCAACTGTGCGGCCTGTCACATGGGGGGCGGCAATGTGATCCGCGCCAACCGAACGCTGAAGATCAGCGACTTGAACGAGCATGTGGAGGCCTACTCCAGCTCCCCGCTGGAAGCCCTGGAACATGAGATCGAGGATGGGCTGAATGCCATGCCCAGCTATGCCGACAAACTGAGTGAGGAGGAGATCATGGCGGTTGCCACCTACGTTGAACAACGGGCCGAATTGGGCTGGTCCAGGCGATGA	MARLSGLMLTLLLIVGATGLLSAPVIAMDTIESSALERGEQIFNSNCAACHMGGGNVIRANRTLKISDLNEHVEAYSSSPLEALEHEIEDGLNAMPSYADKLSEEEIMAVATYVEQRAELGWSRR	SALERGEQIFNSNCAACHMGGGNVIRANRTLKISDLNEHVEAYSSSPLEALEHEIEDGLNAMPSYADKLSEEEIMAVATYVEQRAELGWSRR
Cytochrome c6D	Synechococcus sp. RS9909	SynRS9909_01895	TTGGTTCAGCCGCGACGCAACGCCTTGCCCCTGCCCGGCCTGACTCTTGCTGTGCTGCTGTTCCTGTGTTGGAGCTTGCTAGGCGGCAGCCCAGCCCAGGCCCTCAGGCCGACAGACCCGGTGCCGGCCAATCTCGAGAACGGCAGTCAGGTCTTCTCAGCCCAGTGCGCCGCCTGCCACATGGGCGGCGGCAACGTGATTCGGGCCAGCCGCACCCTGTGCCAGAGCGACCTGCAAGCCCACCTTGCGGCTTACCGCAGCGATCACCTCGAAGCGATCGAAGACCAGGTCGAACACGGCAAAAATGCGATGCCGGCCTTTGCCAGCAAGCTGAGTGAGCGAGACATCGCGGACGTGGCGGCCTTCGTGGAGGAGCAAGCGGAGCGGGGCTGGGGCCGA…	MVQPRRNALPLPGLTLAVLLFLCWSLLGGSPAQALRPTDPVPANLENGSQVFSAQCAACHMGGGNVIRASRTLCQSDLQAHLAAYRSDHLEAIEDQVEHGKNAMPAFASKLSERDIADVAAFVEEQAERGWGR	ANLENGSQVFSAQCAACHMGGGNVIRASRTLCQSDLQAHLAAYRSDHLEAIEDQVEHGKNAMPAFASKLSERDIADVAAFVEEQAERGWGR
Cytochrome c6D	Synechococcus sp. RS9916	RS9916_27744	ATGCCGCGACCGGAACGGATCTTTCCTTTGGTACTCGTGCTGGTCATCGGTCTGATCGGCGCGCTACCAGCCACTGCATCACTGGCTAACCCTGATTCAGGGAATGGCAGTCAGATCTTTTCCACCAACTGCGCGGCTTGCCACATGGGCGGTGGCAACGTGATCCGGGCAAGCCGCACCTTGAGCGAAGCCGATCTTCAGGCCCATCTCGATTCCTACAGCCAAGATCACCTCGAAGCCATCGAACATCAGATCGAAGCCGGGAAAAATGCCATGCCCCCTTATCAGGGCAAGCTCAGCGATGACGACATTGCTGATGTCGCGGCCTATGTGGAAGAGCAGGCCGAGCGGGGTTGGCAGCGATGA	MPRPERIFPLVLVLVIGLIGALPATASLANPDSGNGSQIFSTNCAACHMGGGNVIRASRTLSEADLQAHLDSYSQDHLEAIEHQIEAGKNAMPPYQGKLSDDDIADVAAYVEEQAERGWQR	PDSGNGSQIFSTNCAACHMGGGNVIRASRTLSEADLQAHLDSYSQDHLEAIEHQIEAGKNAMPPYQGKLSDDDIADVAAYVEEQAERGWQR
Cytochrome c6D	Synechococcus sp. SYN20	SynSYN20_02322	ATGCTCCATCCCATGTCCGTGTTCGCATTGCTGCTTTGCATCGGCCTCAACCTGCTGGGAGTCTCACCTGCAATTGCGGCAAGCACTTCTGGCGTTGACGTCGAACATGGTGGGCAACTCTTTTCTGCGAATTGCGCTGCATGTCACATGGGCGGTGGCAATGTGATCAGTGCGTCCAGAACATTGAGTCAAAGCGATCTTCAAGCTCATCTCAATGAGTACGGCGAGGATCACATTGAGGCCATCGAGCACCAAATTGAAAATGGAAAGAATGCGATGCCGTCGTTTGAAGGAAAATTGAGCGAACAAGACATCATTGATGTAGCCGCCTACGTAGAACTCAAGGCTGAAAAAGGCTGGCAGCGATGA	MLHPMSVFALLLCIGLNLLGVSPAIAASTSGVDVEHGGQLFSANCAACHMGGGNVISASRTLSQSDLQAHLNEYGEDHIEAIEHQIENGKNAMPSFEGKLSEQDIIDVAAYVELKAEKGWQR	VDVEHGGQLFSANCAACHMGGGNVISASRTLSQSDLQAHLNEYGEDHIEAIEHQIENGKNAMPSFEGKLSEQDIIDVAAYVELKAEKGWQR
Cytochrome c6D	Synechococcus sp. TAK9802	SynTAK9802_01658	ATGGCACGCCTATCAGGCCTGATCCTGACGTTGCTGTTGATCGTTGGCGCAACAGGCCTGCTGTCTGCTCCGGCGATGGCGATGGACACGATGGAAAGCTCCGCCCTGGAGCGAGGTGAGCAGATTTTCAACAGCAACTGTGCGGCTTGTCACATGGGGGGCGGCAATGTGATCCGCGCCAACAGAACACTGAAGATCAGCGACTTGAACGACCATGTGGAGGCCTACTCCAGCTCCCCGCTGGAGGCTCTGGAGCATGAGATCGAGGATGGGCTGAATGCCATGCCCAGCTATGCCGACAAACTGAGTGAAGAGGAGATCATGGCGGTGGCCACCTACGTGGAACAACGGGCCGAATTGGGCTGGTCCAGGCGATGA	MARLSGLILTLLLIVGATGLLSAPAMAMDTMESSALERGEQIFNSNCAACHMGGGNVIRANRTLKISDLNDHVEAYSSSPLEALEHEIEDGLNAMPSYADKLSEEEIMAVATYVEQRAELGWSRR	SALERGEQIFNSNCAACHMGGGNVIRANRTLKISDLNDHVEAYSSSPLEALEHEIEDGLNAMPSYADKLSEEEIMAVATYVEQRAELGWSRR
Cytochrome c6D	Synechococcus sp. WH 7805	WH7805_00160	ATGCTGAACCCCACCTCCTTCCTGGCCTTGCTGCTCAGCATTGGCCTGGGGCTGATGAGTGCAATGCCTGCCTCTGCTCTGAGCAGTCCGGACCCAGAGCATGGAGCCCAGCTGTTCTCCGCGAACTGTGCGGCTTGTCATATGGGTGGAGGCAATGTCATCAGCGCAAGCCGCACCCTGAGCCAGACTGATCTCCAAGCCCATCTGGAGTCTTATGGCATGGACCCGCTCGAGGCGATCGAACATCAGATCGAAAACGGCAAGAACGCCATGCCTGCCTATGAAGGCAAGCTCAGCGATCAGGACATTGCGGATGTCGCGGCCTATGTGGAACGCCAAGCTGAACATGGCTGGTCCCGATGA	MLNPTSFLALLLSIGLGLMSAMPASALSSPDPEHGAQLFSANCAACHMGGGNVISASRTLSQTDLQAHLESYGMDPLEAIEHQIENGKNAMPAYEGKLSDQDIADVAAYVERQAEHGWSR	PDPEHGAQLFSANCAACHMGGGNVISASRTLSQTDLQAHLESYGMDPLEAIEHQIENGKNAMPAYEGKLSDQDIADVAAYVERQAEHGWSR
Cytochrome c6D	Synechococcus sp. WH 8020	WB44_06405	ATGCTCAATCTCATTTCCCTGTTCGCCTTGATCCTCTGCATCAGCCTCAACCTGTTGGGAGCGACACCTGCATCTGCAGCCAGTGCTCCTGGCGTTGACCTCGAGCACGGTGGACAACTCTTTTCTTCAAACTGTGCGGCATGCCATATGGGTGGTGGCAACGTGATCAGTGCGTCCAGAACTTTGAGTCAGAGCGATCTGCAAGCTCATCTCAATGAGTACGGCGACGATCACATCGAGGCCATCGAACACCAAATTGAAAACGGAAAAAATGCAATGCCCTCGTTCGTGGGGAAATTAACTGAGCAAGACATCATTGATGTGGCCGCCTACGTTGAGCTGAAGGCTGAAAAAGGCTGGCAGCGATGA	MLNLISLFALILCISLNLLGATPASAASAPGVDLEHGGQLFSSNCAACHMGGGNVISASRTLSQSDLQAHLNEYGDDHIEAIEHQIENGKNAMPSFVGKLTEQDIIDVAAYVELKAEKGWQR	VDLEHGGQLFSSNCAACHMGGGNVISASRTLSQSDLQAHLNEYGDDHIEAIEHQIENGKNAMPSFVGKLTEQDIIDVAAYVELKAEKGWQR
Cytochrome c6D	Synechococcus sp. WH 8101	SynRCC2555_01963	TTGCCCCTGCCCGGCCTGTCTCTTGGTGTGCTGCTGTTGCTGTGGTTGAGCTTGCTTAGCGGCAGCCCGACCCTGGCCCTCAACCCCACGGACGCGGTGCCGGCCAATCTCGAGAATGGCAGTCAGGTCTTCTCAGCCCAATGCGCCGCCTGCCACATGGGCGGCGGCAACGTGATTCGGGCCAACCGCACCCTCAGCCAGACCGACCTGCAAGCCCACCTTGCGGCCTACCGCAGCGATCACCTCGAAGCGATCGAAGAGCAGGTGGAACACGGCAACAATGCGATGCCGGCCTTTGCCGGCAAGCTGAGCGAGCAAGACATTGCTGACGTGGCGGCCTTCGTGGAAGAGCAGGCGGAGCGGGGCTGGGGCCGATGA	MPLPGLSLGVLLLLWLSLLSGSPTLALNPTDAVPANLENGSQVFSAQCAACHMGGGNVIRANRTLSQTDLQAHLAAYRSDHLEAIEEQVEHGNNAMPAFAGKLSEQDIADVAAFVEEQAERGWGR	ANLENGSQVFSAQCAACHMGGGNVIRANRTLSQTDLQAHLAAYRSDHLEAIEEQVEHGNNAMPAFAGKLSEQDIADVAAFVEEQAERGWGR
Cytochrome c6D	Tolypothrix sp. PCC 7601	FDUTEX481_08195	TTGCCGAATGGTTGTTGCAAGGAGAATCTCTTGAGAATATTTTTATTTATCCTGCTGTTGGCGATCGCATTATTTAGATTTACATTCATTCTGCCAGCATTAGCTGCCGAAACATCCGATGGCGCGAAAATCTTTGATGCTAATTGTTCTTCTTGCCATATTGGGGGCGGTAATATCTTAATTAGCCATAAAACCTTGAAAAAAGAAGCATTATCAAGTTATTTGGAAAATTACGACCAAGACCCCATTCAAGCAATTATCCACCAGGTACAGAATGGCAAAAATGCCATGCCTCCCTTTAAAAACAAGTTAAGCACTCAAGAAATTTTAGAGGTAGCTGCTTACGTCTTCCAGAAAGCGGAAACAGGTTGGCAAAGTACCTCATCTGCTGCTACACCT…	MPNGCCKENLLRIFLFILLLAIALFRFTFILPALAAETSDGAKIFDANCSSCHIGGGNILISHKTLKKEALSSYLENYDQDPIQAIIHQVQNGKNAMPPFKNKLSTQEILEVAAYVFQKAETGWQSTSSAATP	AETSDGAKIFDANCSSCHIGGGNILISHKTLKKEALSSYLENYDQDPIQAIIHQVQNGKNAMPPFKNKLSTQEILEVAAYVFQKAETGWQSTSSAATP
Cytochrome c6D	Trichormus variabilis SAG 1403-4b	DSM107003_23900	ATGCTGGATGCTTGTTACGAGGAAAATCTCTTGAGAATACTGTTATTAACTCTAGTTTTAGCGATCGCTCTACTTAACTTAACCGGCATTCATCCAGCCTTAGCCGCAGAAACATTCAACGGAGGCAAAATTTTTAATGATAACTGTTCTGCCTGCCATATCGGAGGTGCTAATATCCTCATTGAGCATAAAACTTTACAAAAAGCAGCATTATCAAAATATTTGGAAAATTATGATATTGAACCGATCCAGGCTATTATTTACCAAATACAGAATGGTAAAGGTGCCATGCCCGCCTTCAAGAACAGGTTAAGCTATCAGGAAATACTGGAGGTAGCCGCTTATGTTTTCCAGAAAGCGGAAACAAGCTGGTAA	MLDACYEENLLRILLLTLVLAIALLNLTGIHPALAAETFNGGKIFNDNCSACHIGGANILIEHKTLQKAALSKYLENYDIEPIQAIIYQIQNGKGAMPAFKNRLSYQEILEVAAYVFQKAETSW	AETFNGGKIFNDNCSACHIGGANILIEHKTLQKAALSKYLENYDIEPIQAIIYQIQNGKGAMPAFKNRLSYQEILEVAAYVFQKAETSW
Cytochrome c6D	Westiellopsis prolifica IICB1	B4U84_18075	TTGAGATTAGTATTATTAATTTTGCTATTGTTTATTTTTATATTTATCAGTCCAGCACAGGCGGCCGAAATTTCTCCTGCTGCCAAAATATTTGCTTCTAACTGTGCCTCTTGTCATATTGGTGGTGGGAATGTCCTCATCGCTGAGAAAACCTTGAGAAAAGAAGCCTTGCAAAAGTATTTGGAAAATTACGATGTTAACTCACTAACAGCAATTATTCACCAAGTCAAAAACGGCAAAAATGCTATGCCTGCTTTTAAAAGCAAATTAAGCGAAGATGAAATTATCGAAGTAGCTAGTTACGTTTTTCAAAAAGCAGAACAGGGTTGGTAA	MRLVLLILLLFIFIFISPAQAAEISPAAKIFASNCASCHIGGGNVLIAEKTLRKEALQKYLENYDVNSLTAIIHQVKNGKNAMPAFKSKLSEDEIIEVASYVFQKAEQGW	AEISPAAKIFASNCASCHIGGGNVLIAEKTLRKEALQKYLENYDVNSLTAIIHQVKNGKNAMPAFKSKLSEDEIIEVASYVFQKAEQGW

## Sheet: Sequences used for genome loc
Cytochrome classification	Species	Accesion link	Presence of the conserved localisation within genome?
Cytochrome c6D	Calothrix desertica PCC 7102	CAL7102_04137	Yes
Cytochrome c6D	Calothrix sp. 336/3	IJ00_13895	No
Cytochrome c6D	Calothrix sp. HK-06	NIES2101_15705	yes
Cytochrome c6D	Calothrix sp. NIES-4071	NIES4071_66930	yes
Cytochrome c6D	Calothrix sp. PCC 6303	Cal6303_0740	No
Cytochrome c6D	Calothrix sp. PCC 7507	Cal7507_4356	No
Cytochrome c6D	Chlorogloeopsis fritschii PCC 6912	PCC6912_03910	yes
Cytochrome c6D	Cylindrospermopsis raciborskii C03	CEP13_00505	yes
Cytochrome c6D	Cylindrospermopsis raciborskii C07	CEP15_03990	yes
Cytochrome c6D	Cylindrospermopsis raciborskii CENA302	CENA302_08535	yes
Cytochrome c6D	Cylindrospermopsis raciborskii CENA303	B7O87_03620	yes
Cytochrome c6D	Cylindrospermopsis raciborskii Cr2010	C6N34_08160	yes
Cytochrome c6D	Cylindrospermopsis raciborskii CS-505	A9P98_09980	yes
Cytochrome c6D	Cylindrospermopsis raciborskii CS-508	BCV63_07215	yes
Cytochrome c6D	Cylindrospermopsis raciborskii MVCC14	BCV64_00690	yes
Cytochrome c6D	Cylindrospermopsis raciborskii S01	CEP07_00050	yes
Cytochrome c6D	Cylindrospermopsis raciborskii S05	CEP08_06615	yes
Cytochrome c6D	Cylindrospermopsis raciborskii S06	CEP09_01200	yes
Cytochrome c6D	Cylindrospermopsis raciborskii S07	CEP10_03165	yes
Cytochrome c6D	Cylindrospermopsis raciborskii S10	CEP11_08325	yes
Cytochrome c6D	Cylindrospermopsis raciborskii S14	CEP12_07210	yes
Cytochrome c6D	Cylindrospermopsis sp. CR12	ASL19_00875	yes
Cytochrome c6D	Cylindrospermum sp. NIES-4074	NIES4074_45330	yes
Cytochrome c6D	Fischerella major NIES-592	NIES592_14090	yes
Cytochrome c6D	Fischerella muscicola CCMEE 5323	CEN44_23310	yes
Cytochrome c6D	Fischerella sp. NIES-3754	FIS3754_10410	yes
Cytochrome c6D	Fischerella sp. NIES-4106	NIES4106_16980	yes
Cytochrome c6D	Fischerella thermalis	FJSC11DRAFT_3222	yes
Cytochrome c6D	Fischerella thermalis 111/344/542	CA946_11685	yes
Cytochrome c6D	Hapalosiphon sp. MRB220	AMR41_23275	yes
Cytochrome c6D	Leptolyngbya sp. O-77	O77CONTIG1_01276	No
Cytochrome c6D	Nostoc calcicola FACHB-389	FACHB389_32450	yes
Cytochrome c6D	Nostoc cycadae WK-1	NCWK1_0332	yes
Cytochrome c6D	Nostoc flagelliforme CCNUN1	COO91_04701	yes
Cytochrome c6D	Nostoc linckia NIES-25	NIES25_16910	yes
Cytochrome c6D	Nostoc linckia z1	VF02_08765	yes
Cytochrome c6D	Nostoc piscinale CENA21	ACX27_30135	yes
Cytochrome c6D	Nostoc punctiforme PCC 73102	Npun_R2788	yes
Cytochrome c6D	Nostoc sp. 'Lobaria pulmonaria (5183) cyanobiont'	NLP_4514	yes
Cytochrome c6D	Nostoc sp. 'Peltigera membranacea cyanobiont' 210A	CDG76_02195	yes
Cytochrome c6D	Nostoc sp. 'Peltigera membranacea cyanobiont' 213	CDG77_13110	yes
Cytochrome c6D	Nostoc sp. 106C	BV375_28245	yes
Cytochrome c6D	Nostoc sp. ATCC 53789	A6V25_22970	yes
Cytochrome c6D	Nostoc sp. CENA543	CLI64_22740	yes
Cytochrome c6D	Nostoc sp. NIES-3756	NOS3756_22920	yes
Cytochrome c6D	Nostoc sp. NIES-2111	NIES2111_32870	yes
Cytochrome c6D	Nostoc sp. PCC 7107	Nos7107_5409	yes
Cytochrome c6D	Nostoc sp. PCC 7120 = FACHB-418	asl0256	yes
Cytochrome c6D	Nostoc sp. RF31YmG	BV378_22780	yes
Cytochrome c6D	Nostoc sp. T09	BV372_24390	yes
Cytochrome c6D	Nostoc sphaeroides CCNUC1	GXM_04882	yes
Cytochrome c6D	Planktothrix agardhii CCAP 1459/11A	PA905_25580	No
Cytochrome c6D	Planktothrix paucivesiculata PCC 9631	PL9631_560042	No
Cytochrome c6D	Planktothrix serta PCC 8927	PL8927_600213	No
Cytochrome c6D	Planktothrix sp. PCC 11201	PL11201_120003	No
Cytochrome c6D	Planktothrix tepida PCC 9214	PL9214500504	No
Cytochrome c6D	Raphidiopsis brookii D9	CRD_02789	yes
Cytochrome c6D	Scytonema hofmannii PCC 7110	WA1_39045	yes
Cytochrome c6D	Scytonema sp. HK-05	NIES2130_18950	yes
Cytochrome c6D	Sphaerospermopsis reniformis	SR1949_24960	yes
Cytochrome c6D	Synechococcus sp. A15-44	SynA1544_02446	No
Cytochrome c6D	Synechococcus sp. A15-60	SynA1560_01259	No
Cytochrome c6D	Synechococcus sp. A15-62	SynA1562_01035	yes
Cytochrome c6D	Synechococcus sp. BMK-MC-1	SynBMKMC1_00889	yes
Cytochrome c6D	Synechococcus sp. BS55D	CWE16_04215	No
Cytochrome c6D	Synechococcus sp. CC9311	sync_1742	No
Cytochrome c6D	Synechococcus sp. CC9311	sync_1890	yes
Cytochrome c6D	Synechococcus sp. KORDI-52	KR52_11970	No
Cytochrome c6D	Synechococcus sp. MEDNS5	SynMEDNS5_00806	yes
Cytochrome c6D	Synechococcus sp. MVIR-18-1	SynMVIR181_02040	yes
Cytochrome c6D	Synechococcus sp. NOUM97013	SynNOUM97013_01924	yes
Cytochrome c6D	Synechococcus sp. PROS-7-1	SynPROS71_00867	yes
Cytochrome c6D	Synechococcus sp. PROS-9-1	SynPROS91_01821	yes
Cytochrome c6D	Synechococcus sp. PROS-U-1	SynPROSU1_01193	yes
Cytochrome c6D	Synechococcus sp. ROS8604	SynROS8604_02551	yes
Cytochrome c6D	Synechococcus sp. RS9902	SynRS9902_02023	yes
Cytochrome c6D	Synechococcus sp. RS9909	SynRS9909_01895	yes
Cytochrome c6D	Synechococcus sp. RS9916	RS9916_27744	yes
Cytochrome c6D	Synechococcus sp. SYN20	SynSYN20_02322	yes
Cytochrome c6D	Synechococcus sp. TAK9802	SynTAK9802_01658	yes
Cytochrome c6D	Synechococcus sp. WH 7805	WH7805_00160	yes
Cytochrome c6D	Synechococcus sp. WH 8020	WB44_06405	yes
Cytochrome c6D	Synechococcus sp. WH 8101	SynRCC2555_01963	yes
Cytochrome c6D	Tolypothrix sp. PCC 7601	FDUTEX481_08195	No
Cytochrome c6D	Trichormus variabilis SAG 1403-4b	DSM107003_23900	yes
Cytochrome c6D	Westiellopsis prolifica IICB1	B4U84_18075	yes
